# Supplementary material for: Analyzing moisture-heat coupling in a wheat-soil system using data-driven vector autoregression model
Source: PeerJ. 2019 Jun 11;7:e7101. doi: 10.7717/peerj.7101 (PMC6568251; doi:10.7717/peerj.7101)
Supplement: Supplemental Information 1 — These data are raw data used during the training stage for building the vector autoregression model and impulse response functions, as well as conducting Granger causality tests. [file peerj-07-7101-s001.xlsx]

## Sheet: 工作表1
Time		10 cm		30 cm		90 cm
		soil moisture	soil temperature	soil moisture	soil temperature	soil moisture	soil temperature
2017-12-19 00:02:43		-2.76	0.25	-0.57	-0.375	0.14	-0.313
2017-12-19 01:02:47		-2.6	0.25	-0.53	-0.375	0.16	-0.375
2017-12-19 02:02:50		-2.47	0.125	-0.49	-0.375	0.17	-0.313
2017-12-19 03:02:44		-2.35	0.063	-0.47	-0.375	0.19	-0.313
2017-12-19 04:02:45		-2.26	0	-0.46	-0.313	0.18	-0.25
2017-12-19 05:02:44		-2.23	0.063	-0.43	-0.313	0.19	-0.313
2017-12-19 06:02:44		-2.09	0.125	-0.41	-0.313	0.19	-0.25
2017-12-19 07:02:46		-1.92	0.125	-0.38	-0.313	0.21	-0.313
2017-12-19 08:02:50		-1.61	0.25	-0.37	-0.313	0.2	-0.25
2017-12-19 09:02:41		-1.2	0	-0.36	-0.313	0.2	-0.25
2017-12-19 10:04:03		-1.01	0.063	-0.32	-0.375	0.21	-0.25
2017-12-19 11:02:35		-0.86	0.125	-0.3	-0.375	0.2	-0.25
2017-12-19 12:04:18		-0.57	0.25	-0.31	-0.313	0.22	-0.25
2017-12-19 13:03:27		-0.41	2	-0.29	-0.313	0.22	-0.313
2017-12-19 14:02:55		-0.56	2.125	-0.3	-0.25	0.21	-0.313
2017-12-19 15:02:47		-1.07	2.625	-0.29	-0.313	0.21	-0.25
2017-12-19 16:02:45		-1.11	2.5	-0.27	-0.25	0.2	-0.25
2017-12-19 17:02:53		-1.09	2	-0.26	-0.25	0.18	-0.25
2017-12-19 18:03:59		-1.13	1.375	-0.26	-0.25	0.19	-0.188
2017-12-19 19:04:54		-1.18	0.875	-0.25	-0.188	0.17	-0.25
2017-12-19 20:02:57		-1.16	0.563	-0.25	-0.188	0.17	-0.25
2017-12-19 21:02:45		-1.18	0.063	-0.24	-0.188	0.17	-0.25
2017-12-19 22:02:46		-1.19	-0.188	-0.23	-0.188	0.19	-0.188
2017-12-19 23:02:45		-1.21	-0.438	-0.21	-0.188	0.17	-0.188
2017-12-20 00:02:46		-1.25	-0.5	-0.22	-0.125	0.18	-0.25
2017-12-20 01:02:43		-1.36	-0.563	-0.21	-0.125	0.18	-0.188
2017-12-20 02:02:51		-1.5	-0.438	-0.2	-0.125	0.16	-0.25
2017-12-20 03:02:43		-1.68	-0.313	-0.19	-0.125	0.16	-0.25
2017-12-20 04:02:46		-1.76	0.25	-0.18	-0.125	0.18	-0.188
2017-12-20 05:02:46		-1.58	0.375	-0.17	-0.125	0.16	-0.188
2017-12-20 06:02:46		-1.3	0.438	-0.18	-0.063	0.16	-0.25
2017-12-20 07:02:49		-0.81	0.625	-0.18	-0.063	0.16	-0.188
2017-12-20 08:02:52		-0.13	0.438	-0.18	-0.063	0.17	-0.188
2017-12-20 09:02:46		0.24	0.313	-0.16	-0.063	0.15	-0.188
2017-12-20 10:03:54		0.35	0.25	-0.16	0	0.15	-0.188
2017-12-20 11:03:08		0.49	0.25	-0.15	-0.063	0.15	-0.25
2017-12-20 12:03:15		0.61	1.563	-0.14	-0.063	0.15	-0.25
2017-12-20 13:03:05		0.34	1.813	-0.16	-0.063	0.14	-0.125
2017-12-20 14:03:23		-0.46	1.875	-0.14	-0.125	0.15	-0.188
2017-12-20 15:03:27		-0.59	1.375	-0.14	-0.063	0.14	-0.188
2017-12-20 16:02:47		-0.61	1.188	-0.14	-0.063	0.14	-0.188
2017-12-20 17:02:46		-0.59	1.313	-0.14	-0.063	0.14	-0.125
2017-12-20 18:02:42		-0.57	1.688	-0.13	0	0.14	-0.188
2017-12-20 19:02:45		-0.53	2.125	-0.13	-0.063	0.15	-0.125
2017-12-20 20:02:55		-0.52	2.375	-0.11	-0.063	0.15	-0.125
2017-12-20 21:02:44		-0.43	3	-0.12	0	0.15	-0.125
2017-12-20 22:02:45		-0.35	3.25	-0.12	0	0.13	-0.188
2017-12-20 23:02:44		-0.28	3.375	-0.11	0	0.13	-0.125
2017-12-21 00:02:45		-0.18	3.313	-0.11	0	0.12	-0.188
2017-12-21 01:02:46		0.01	3.375	-0.11	0	0.12	-0.188
2017-12-21 02:02:50		0.3	3.313	-0.11	0.063	0.13	-0.125
2017-12-21 03:02:42		0.72	3.188	-0.1	0.063	0.13	-0.125
2017-12-21 04:02:46		1.16	2.375	-0.1	0.063	0.11	-0.188
2017-12-21 05:02:46		1.5	1.75	-0.1	0.125	0.13	-0.188
2017-12-21 06:02:46		1.84	1.25	-0.09	0.125	0.11	-0.125
2017-12-21 07:02:47		2.04	0.875	-0.08	0.125	0.11	-0.125
2017-12-21 08:02:48		2.06	0.75	-0.07	0.125	0.1	-0.188
2017-12-21 09:02:43		1.97	0.938	-0.07	0.125	0.11	-0.125
2017-12-21 10:02:47		1.83	1.5	-0.08	0.188	0.11	-0.188
2017-12-21 11:02:43		1.3	2.375	-0.08	0.188	0.13	-0.125
2017-12-21 12:04:07		0.27	1.875	-0.06	0.188	0.11	-0.125
2017-12-21 13:03:26		-0.58	0.938	-0.05	0.188	0.13	-0.188
2017-12-21 14:03:18		-0.56	0.813	-0.07	0.313	0.11	-0.125
2017-12-21 15:03:02		-0.51	0.938	-0.05	0.25	0.12	-0.125
2017-12-21 16:03:01		-0.48	0.875	-0.06	0.25	0.11	-0.125
2017-12-21 17:02:47		-0.48	0.688	-0.05	0.313	0.11	-0.125
2017-12-21 18:03:14		-0.46	0.563	-0.05	0.25	0.11	-0.125
2017-12-21 19:02:45		-0.45	0.375	-0.04	0.313	0.11	-0.125
2017-12-21 20:02:50		-0.43	0.438	-0.05	0.313	0.12	-0.125
2017-12-21 21:02:43		-0.42	0.438	-0.03	0.25	0.11	-0.125
2017-12-21 22:02:43		-0.39	0.625	-0.04	0.313	0.12	-0.063
2017-12-21 23:02:44		-0.34	0.813	-0.04	0.313	0.12	-0.125
2017-12-22 00:02:51		-0.3	1	-0.04	0.313	0.12	-0.063
2017-12-22 01:02:43		-0.28	1.125	-0.03	0.313	0.11	-0.063
2017-12-22 02:02:47		-0.27	1.25	-0.03	0.25	0.12	-0.063
2017-12-22 03:02:46		-0.25	1.438	-0.04	0.313	0.11	-0.063
2017-12-22 04:02:43		-0.19	1.875	-0.03	0.375	0.12	-0.063
2017-12-22 05:02:49		-0.13	2.5	-0.02	0.313	0.12	0
2017-12-22 06:02:44		-0.09	2.813	-0.02	0.313	0.13	-0.063
2017-12-22 07:02:45		0	3.125	-0.03	0.313	0.11	-0.125
2017-12-22 08:03:45		0.12	3.25	-0.02	0.313	0.11	0
2017-12-22 09:02:44		0.12	3	-0.03	0.375	0.11	-0.063
2017-12-22 10:02:44		-0.05	2.625	-0.02	0.313	0.11	0
2017-12-22 11:02:52		-0.17	2.188	-0.02	0.375	0.1	0
2017-12-22 12:02:42		-0.21	1.938	-0.03	0.375	0.09	0
2017-12-22 13:02:44		-0.36	1.063	-0.03	0.438	0.08	0
2017-12-22 14:02:58		-0.53	-0.375	-0.01	0.375	0.1	0
2017-12-22 15:02:46		-0.57	-1.063	-0.03	0.438	0.09	0
2017-12-22 16:04:26		-0.58	-1.125	-0.01	0.438	0.1	0
2017-12-22 17:02:45		-0.49	-0.625	-0.01	0.375	0.11	0
2017-12-22 18:02:48		-0.44	-0.188	0	0.5	0.11	0
2017-12-22 19:02:51		-0.46	-0.125	-0.01	0.438	0.1	0
2017-12-22 20:02:51		-0.49	-0.313	0.01	0.438	0.09	0
2017-12-22 21:02:45		-0.48	-0.313	-0.01	0.5	0.1	0
2017-12-22 22:02:46		-0.49	-0.5	0.01	0.438	0.09	0
2017-12-22 23:02:45		-0.52	-0.625	0	0.438	0.1	0
2017-12-23 00:02:45		-0.6	-1.375	0.01	0.438	0.1	0
2017-12-23 01:02:45		-0.66	-2	0.01	0.438	0.1	0.063
2017-12-23 02:02:49		-0.69	-2.438	0.01	0.438	0.1	0
2017-12-23 03:02:46		-0.73	-2.688	0.01	0.438	0.1	0
2017-12-23 04:02:42		-0.78	-3	0	0.375	0.1	0
2017-12-23 05:02:42		-0.84	-3.313	-0.01	0.375	0.11	0
2017-12-23 06:02:45		-0.96	-3.25	-0.01	0.375	0.11	0
2017-12-23 07:02:45		-1.09	-3.313	0	0.375	0.12	0.063
2017-12-23 08:02:49		-1.25	-3.313	-0.02	0.375	0.11	0.063
2017-12-23 09:02:47		-1.2	-3.125	0	0.313	0.11	0.063
2017-12-23 10:02:42		-0.83	-2.688	-0.01	0.313	0.12	0
2017-12-23 11:04:07		-0.52	-1.25	0	0.25	0.11	0.063
2017-12-23 12:04:29		-0.39	-0.063	0	0.25	0.12	0.063
2017-12-23 13:05:06		-0.29	0.875	-0.01	0.188	0.12	0.063
2017-12-23 14:05:46		-0.22	1.438	-0.02	0.188	0.11	0.063
2017-12-23 15:04:07		-0.25	1.563	-0.01	0.188	0.12	0.063
2017-12-23 16:03:24		-0.27	1.375	-0.02	0.125	0.12	0.063
2017-12-23 17:02:46		-0.36	0.625	-0.02	0.125	0.1	0.063
2017-12-23 18:02:46		-0.45	-0.25	-0.04	0.063	0.11	0.063
2017-12-23 19:04:31		-0.51	-0.688	-0.03	0.063	0.11	0.063
2017-12-23 20:02:57		-0.54	-1.125	-0.05	0.063	0.11	0.063
2017-12-23 21:02:45		-0.62	-1.875	-0.04	0	0.1	0.063
2017-12-23 22:02:44		-0.67	-2.375	-0.05	0.063	0.11	0.063
2017-12-23 23:02:43		-0.74	-2.688	-0.05	0.063	0.1	0.063
2017-12-24 00:02:44		-0.81	-2.25	-0.05	0	0.11	0.063
2017-12-24 01:02:45		-0.96	-1.813	-0.07	0	0.09	0.063
2017-12-24 02:02:47		-1.18	-1.5	-0.08	0	0.1	0.063
2017-12-24 03:02:44		-1.43	-1.375	-0.08	0	0.1	0.063
2017-12-24 04:02:44		-1.73	-1.188	-0.08	-0.063	0.1	0.063
2017-12-24 05:02:44		-2.03	-0.813	-0.09	-0.063	0.08	0.063
2017-12-24 06:02:47		-2.25	-0.813	-0.1	-0.063	0.09	0.063
2017-12-24 07:02:44		-2.53	-0.813	-0.11	-0.063	0.08	0.063
2017-12-24 08:02:49		-2.83	-0.938	-0.1	-0.125	0.09	0.063
2017-12-24 09:02:42		-2.96	-1.063	-0.1	-0.125	0.09	0.063
2017-12-24 10:02:48		-1.76	-1.063	-0.09	-0.125	0.1	0.063
2017-12-24 11:02:45		-0.87	-1.375	-0.1	-0.125	0.09	0.063
2017-12-24 12:02:49		-0.52	-1.125	-0.11	-0.125	0.11	0
2017-12-24 13:02:51		-0.5	-0.938	-0.1	-0.188	0.08	0.063
2017-12-24 14:03:01		-0.55	-1.125	-0.1	-0.188	0.09	0.063
2017-12-24 15:02:45		-0.76	-2.375	-0.09	-0.25	0.08	0.063
2017-12-24 16:04:01		-0.89	-3.625	-0.1	-0.188	0.07	0.063
2017-12-24 17:02:37		-0.9	-3.688	-0.1	-0.25	0.08	0.063
2017-12-24 18:02:48		-0.8	-2.625	-0.09	-0.25	0.08	0
2017-12-24 19:03:13		-0.66	-1.563	-0.09	-0.25	0.08	0.063
2017-12-24 20:02:49		-0.54	-0.438	-0.08	-0.25	0.08	0.063
2017-12-24 21:02:48		-0.52	-0.063	-0.08	-0.188	0.09	0.063
2017-12-24 22:02:45		-0.51	0.125	-0.09	-0.25	0.08	0.063
2017-12-24 23:02:46		-0.49	0	-0.08	-0.25	0.08	0.063
2017-12-25 00:02:45		-0.43	-0.063	-0.09	-0.25	0.08	0
2017-12-25 01:02:45		-0.33	-0.438	-0.08	-0.25	0.1	-0.063
2017-12-25 02:02:49		-0.28	-0.438	-0.07	-0.25	0.07	0.063
2017-12-25 03:02:47		-0.24	-0.313	-0.06	-0.313	0.07	0.063
2017-12-25 04:02:43		-0.19	-0.375	-0.07	-0.25	0.08	0
2017-12-25 05:02:46		-0.15	-0.438	-0.06	-0.25	0.09	0
2017-12-25 06:02:48		-0.11	-0.25	-0.05	-0.25	0.08	0
2017-12-25 07:02:44		0.3	0.375	-0.03	-0.313	0.07	0
2017-12-25 08:02:49		1.17	0.813	-0.04	-0.25	0.08	-0.063
2017-12-25 09:02:48		2.02	1.438	-0.04	-0.25	0.08	-0.063
2017-12-25 11:02:49		1.1	2.875	-0.05	-0.25	0.05	0
2017-12-25 12:03:12		0.06	2.938	-0.05	-0.25	0.06	-0.063
2017-12-25 13:02:45		-0.4	1.875	-0.05	-0.25	0.04	0
2017-12-25 14:02:51		-0.5	0.813	-0.04	-0.188	0.07	-0.063
2017-12-25 15:02:45		-0.61	-0.063	-0.04	-0.25	0.05	-0.063
2017-12-25 17:02:45		-0.54	-0.188	-0.05	-0.188	0.05	-0.063
2017-12-25 18:02:44		-0.68	-1.438	-0.04	-0.188	0.05	-0.063
2017-12-25 19:02:45		-0.63	-1.313	-0.05	-0.125	0.05	-0.063
2017-12-25 20:03:12		-0.62	-1.625	-0.04	-0.125	0.05	0
2017-12-25 21:02:45		-0.64	-2.125	-0.04	-0.125	0.05	-0.063
2017-12-25 22:02:44		-0.71	-2.688	-0.04	-0.125	0.05	-0.063
2017-12-25 23:02:45		-0.77	-2.375	-0.04	-0.188	0.05	-0.063
2017-12-26 00:02:45		-0.91	-2	-0.03	-0.125	0.05	-0.063
2017-12-26 01:02:45		-1.08	-1.625	-0.04	-0.125	0.06	-0.125
2017-12-26 02:02:48		-1.28	-1.25	-0.03	-0.125	0.04	-0.063
2017-12-26 03:02:44		-1.42	-0.25	-0.04	-0.125	0.05	-0.063
2017-12-26 04:02:48		-1.32	-0.063	-0.03	-0.188	0.05	-0.125
2017-12-26 05:02:45		-1.18	0.063	-0.04	-0.125	0.06	-0.125
2017-12-26 06:02:45		-1	0.125	-0.04	-0.188	0.05	-0.063
2017-12-26 07:02:45		-0.82	0.25	-0.04	-0.188	0.04	-0.063
2017-12-26 08:03:21		-0.43	0.375	-0.04	-0.188	0.05	-0.063
2017-12-26 09:02:46		-0.01	0.188	-0.06	-0.125	0.05	-0.063
2017-12-26 10:03:05		0.37	0.375	-0.05	-0.188	0.04	-0.063
2017-12-26 11:03:20		0.35	1.688	-0.05	-0.188	0.03	-0.063
2017-12-26 12:02:43		-0.12	1.313	-0.05	-0.25	0.04	-0.063
2017-12-26 13:03:00		-0.27	0.313	-0.06	-0.188	0.04	-0.063
2017-12-26 14:02:53		-0.36	-0.5	-0.04	-0.25	0.04	-0.063
2017-12-26 15:04:12		-0.41	-0.75	-0.05	-0.25	0.02	-0.063
2017-12-26 16:03:26		-0.42	-1.188	-0.05	-0.188	0.04	-0.063
2017-12-26 17:02:44		-0.39	-0.938	-0.05	-0.188	0.03	-0.125
2017-12-26 19:03:14		-0.14	1.188	-0.04	-0.188	0.05	-0.125
2017-12-26 20:02:52		-0.11	1.688	-0.04	-0.188	0.04	-0.063
2017-12-26 21:02:50		-0.07	2.188	-0.05	-0.188	0.04	-0.125
2017-12-26 22:02:46		-0.06	2.625	-0.05	-0.188	0.04	-0.125
2017-12-26 23:02:49		-0.04	2.75	-0.05	-0.188	0.04	-0.125
2017-12-27 00:02:46		0.06	2.563	-0.05	-0.125	0.03	-0.125
2017-12-27 01:02:50		0.22	2.375	-0.04	-0.188	0.02	-0.063
2017-12-27 02:02:47		0.44	2.313	-0.05	-0.188	0.02	-0.063
2017-12-27 03:02:43		0.7	2.063	-0.04	-0.188	0.03	-0.063
2017-12-27 04:02:43		0.97	1.75	-0.03	-0.188	0.02	-0.063
2017-12-27 05:02:44		1.12	2	-0.04	-0.125	0.03	-0.063
2017-12-27 06:02:46		1.26	2.125	-0.03	-0.188	0.02	-0.063
2017-12-27 07:02:44		1.4	2.313	-0.02	-0.063	0.02	-0.063
2017-12-27 08:02:49		1.57	2.438	-0.02	-0.063	0.02	-0.125
2017-12-27 09:02:41		1.54	2.5	-0.02	-0.063	0.02	-0.063
2017-12-27 10:02:51		1.22	2.938	-0.02	-0.063	0.02	-0.063
2017-12-27 11:02:54		0.59	3.688	-0.01	-0.063	0.03	-0.063
2017-12-27 12:03:20		0	3.125	-0.01	0	0.03	-0.063
2017-12-27 13:02:50		-0.06	2.75	-0.01	0.063	0.04	-0.125
2017-12-27 14:03:37		-0.04	2.938	-0.01	0	0.03	-0.125
2017-12-27 15:02:42		-0.05	2.938	-0.02	0.125	0.02	-0.063
2017-12-27 16:02:52		-0.13	2.313	-0.01	0.063	0.04	-0.125
2017-12-27 17:02:42		-0.18	1.938	0	0.125	0.01	-0.125
2017-12-27 18:02:45		-0.25	1.25	0	0.125	0.01	-0.063
2017-12-27 19:02:45		-0.32	0.625	-0.01	0.125	0	-0.063
2017-12-27 20:02:50		-0.33	0.438	0.01	0.125	0.01	-0.125
2017-12-27 21:02:41		-0.36	0.188	0	0.188	0.01	0
2017-12-27 22:02:42		-0.36	-0.125	0	0.25	0.01	-0.063
2017-12-27 23:02:45		-0.35	-0.188	0	0.25	0.02	-0.063
2017-12-28 00:02:46		-0.36	-0.375	0.01	0.188	0.01	-0.063
2017-12-28 01:02:45		-0.36	-0.438	0	0.25	0.02	-0.125
2017-12-28 02:02:53		-0.36	-0.5	0.02	0.25	0.01	-0.063
2017-12-28 03:02:42		-0.36	-0.688	0.01	0.25	0.02	-0.063
2017-12-28 04:02:46		-0.41	-1.063	0.01	0.313	0.02	-0.063
2017-12-28 05:02:42		-0.45	-1.563	0.01	0.313	0.01	-0.063
2017-12-28 06:02:45		-0.49	-1.875	0.02	0.313	0.02	-0.063
2017-12-28 07:02:46		-0.61	-2.063	0.01	0.25	0.03	-0.063
2017-12-28 08:03:04		-0.79	-2.188	0.01	0.25	0.03	0
2017-12-28 09:02:46		-0.84	-2.063	0.01	0.25	0.03	-0.063
2017-12-28 10:02:47		-0.68	-2.438	0.02	0.25	0.04	-0.063
2017-12-28 11:02:46		-0.5	-2.125	0	0.25	0.03	-0.063
2017-12-28 12:02:44		-0.42	-1.813	0	0.188	0.03	-0.063
2017-12-28 13:02:44		-0.41	-1.75	-0.01	0.188	0.02	0
2017-12-28 14:02:51		-0.39	-1.688	0	0.25	0.03	0
2017-12-28 16:02:57		-0.37	-1.563	0	0.125	0.04	-0.063
2017-12-28 16:02:57		-0.37	-1.625	0	0.188	0.02	0
2017-12-28 17:02:50		-0.34	-1.375	-0.01	0.125	0.04	0
2017-12-28 18:02:45		-0.26	-0.875	-0.01	0.125	0.04	0
2017-12-28 19:02:51		-0.19	-0.313	-0.01	0.125	0.05	0
2017-12-28 20:02:50		-0.17	-0.063	-0.02	0.125	0.04	0
2017-12-28 21:02:43		-0.12	0.313	-0.01	0.063	0.05	-0.063
2017-12-28 22:02:44		-0.07	0.875	0	0	0.05	0
2017-12-28 23:02:43		-0.04	1.25	0	0.063	0.04	0
2017-12-29 00:02:45		0	1.625	-0.01	0.063	0.05	0
2017-12-29 01:02:44		0	1.75	-0.01	0	0.05	0
2017-12-29 02:02:54		0.02	1.875	-0.02	0	0.05	0
2017-12-29 03:02:44		0.05	2.313	-0.02	0.063	0.05	0
2017-12-29 04:02:44		0.09	2.625	-0.01	0	0.05	0
2017-12-29 05:02:44		0.11	2.813	-0.01	0	0.05	0
2017-12-29 06:02:44		0.13	2.875	-0.02	0	0.05	0
2017-12-29 07:02:44		0.21	2.875	-0.01	0	0.03	0
2017-12-29 08:02:48		0.34	2.5	0	0	0.03	0
2017-12-29 09:02:56		0.36	2	0	0	0.03	0
2017-12-29 10:02:40		0.16	2.063	-0.01	0.063	0.03	0
2017-12-29 11:02:48		-0.06	1.375	0	0.063	0.03	0
2017-12-29 12:03:58		0.02	2.375	0	0.063	0.04	0
2017-12-29 13:02:30		-0.03	2.125	0.01	0.063	0.03	0
2017-12-29 14:02:49		-0.11	1.563	0.01	0.063	0.02	0
2017-12-29 15:02:52		-0.19	0.875	0	0.125	0.02	0
2017-12-29 16:04:43		-0.23	0.438	0.01	0.125	0.03	0
2017-12-29 17:04:00		-0.31	-0.25	0.02	0.125	0.02	0
2017-12-29 18:02:46		-0.38	-0.813	0	0.188	0.03	0
2017-12-29 19:03:21		-0.41	-1.375	0.01	0.188	0.02	0
2017-12-29 20:02:52		-0.43	-1.625	0.01	0.188	0.03	0
2017-12-29 21:02:51		-0.48	-2.25	0	0.25	0.02	0
2017-12-29 22:02:46		-0.52	-2.938	0	0.25	0.03	0
2017-12-29 23:02:45		-0.55	-3.5	0.01	0.188	0.02	0
2017-12-30 00:02:50		-0.59	-3.75	0	0.25	0.03	0
2017-12-30 01:02:46		-0.7	-3.75	0.01	0.25	0.02	0
2017-12-30 02:02:49		-0.89	-3.813	0	0.25	0.03	0
2017-12-30 03:02:42		-1.14	-3.938	0.01	0.188	0.02	0
2017-12-30 04:02:45		-1.43	-4.125	-0.01	0.188	0.02	0
2017-12-30 05:02:46		-1.74	-4.25	-0.01	0.188	0.03	0
2017-12-30 06:02:46		-2.06	-4.188	-0.02	0.188	0.03	0
2017-12-30 07:02:46		-2.38	-3.938	-0.03	0.125	0.03	0
2017-12-30 08:02:50		-2.4	-2.875	-0.04	0.125	0.04	0
2017-12-30 09:02:44		-1.82	-2.313	-0.04	0.125	0.03	0
2017-12-30 10:03:01		-0.81	-2.188	-0.03	0	0.03	0
2017-12-30 11:04:39		-0.23	-0.875	-0.03	0.063	0.03	0
2017-12-30 13:02:27		-0.32	-1.688	-0.03	0	0.02	0
2017-12-30 14:03:03		-0.34	-1.688	-0.05	0	0.02	0
2017-12-30 15:02:52		-0.32	-1.563	-0.05	0	0.03	0
2017-12-30 16:03:22		-0.31	-1.313	-0.04	-0.063	0.03	0
2017-12-30 17:03:28		-0.32	-1.25	-0.06	-0.063	0.03	0
2017-12-30 18:02:27		-0.32	-1.188	-0.07	-0.063	0.03	0
2017-12-30 19:02:43		-0.34	-1.188	-0.04	-0.188	0.02	0
2017-12-30 20:02:48		-0.34	-1.25	-0.06	-0.188	0.03	0
2017-12-30 21:02:44		-0.35	-1.313	-0.05	-0.188	0.03	0
2017-12-30 22:02:44		-0.35	-1.063	-0.05	-0.25	0.03	0
2017-12-30 23:02:48		-0.35	-0.813	-0.05	-0.25	0.02	0
2017-12-31 00:02:44		-0.34	-0.438	-0.06	-0.25	0.03	0
2017-12-31 01:02:45		-0.32	-0.313	-0.05	-0.313	0.02	0
2017-12-31 02:02:48		-0.24	-0.125	-0.06	-0.313	0.03	0
2017-12-31 03:02:44		-0.13	0.438	-0.05	-0.313	0.02	0
2017-12-31 04:02:46		0	0.688	-0.06	-0.313	0.02	0
2017-12-31 05:02:42		0.16	0.625	-0.06	-0.313	0.03	0
2017-12-31 06:02:45		0.32	1	-0.07	-0.313	0.02	0
2017-12-31 07:02:44		0.51	0.938	-0.06	-0.375	0.02	0
2017-12-31 08:02:49		0.7	0.813	-0.05	-0.313	0.02	0
2017-12-31 09:02:42		0.8	0.375	-0.06	-0.313	0.01	0
2017-12-31 10:02:45		0.67	0.375	-0.06	-0.313	0.02	0
2017-12-31 11:03:33		0.25	1.375	-0.06	-0.313	0.02	0
2017-12-31 12:02:54		-0.14	1.5	-0.07	-0.313	0.02	0
2017-12-31 14:02:50		-0.18	1.25	-0.08	-0.25	0.02	0
2017-12-31 14:02:50		-0.15	1.313	-0.06	-0.313	0.02	0
2017-12-31 15:03:07		-0.18	1.063	-0.06	-0.313	0.02	0
2017-12-31 16:03:14		-0.17	1.063	-0.06	-0.313	0.02	0
2017-12-31 17:02:44		-0.14	1.125	-0.05	-0.313	0.01	0
2017-12-31 18:02:47		-0.11	1.5	-0.05	-0.313	0.02	-0.063
2017-12-31 19:02:49		0	2.25	-0.06	-0.25	0.02	0
2017-12-31 20:02:47		0.05	3.125	-0.04	-0.25	0.01	-0.063
2017-12-31 21:02:43		-0.01	2.688	-0.06	-0.188	0.01	-0.063
2017-12-31 22:02:44		-0.02	2.625	-0.04	-0.188	0.01	-0.063
2017-12-31 23:02:47		-0.02	2.75	-0.05	-0.188	0.01	-0.063
2018-01-01 00:02:43		-0.04	2.563	-0.05	-0.125	0.01	-0.063
2018-01-01 01:02:48		-0.01	2.75	-0.05	-0.125	0.01	-0.063
2018-01-01 02:02:47		0.08	2.938	-0.05	-0.125	0.01	-0.063
2018-01-01 03:02:46		0.2	2.813	-0.04	-0.063	0.02	-0.125
2018-01-01 04:02:48		0.33	2.813	-0.03	-0.063	0.01	-0.063
2018-01-01 05:02:46		0.47	3.125	-0.02	-0.063	0	-0.063
2018-01-01 06:02:47		0.62	2.938	-0.03	0	0.01	-0.063
2018-01-01 07:02:44		0.77	3	-0.02	0.063	0.01	-0.063
2018-01-01 08:02:49		0.93	3.125	-0.02	0.063	0.02	-0.125
2018-01-01 09:02:46		0.93	3.125	-0.01	0.063	0.02	-0.125
2018-01-01 10:02:43		0.56	3.25	0	0	0.01	-0.125
2018-01-01 11:02:45		-0.02	2.25	-0.01	0.063	0	-0.125
2018-01-01 12:04:33		-0.27	0.5	0	0.125	0	-0.125
2018-01-01 13:02:43		-0.45	-1.063	0	0.125	0	-0.125
2018-01-01 14:02:50		-0.63	-2.625	0.02	0.125	0	-0.125
2018-01-01 15:03:47		-0.69	-3.375	0.01	0.188	-0.01	-0.063
2018-01-01 16:02:52		-0.71	-3.813	0	0.25	0	-0.125
2018-01-01 17:02:42		-0.65	-3.5	0	0.25	0	-0.125
2018-01-01 18:02:59		-0.53	-2.813	0.02	0.25	0	-0.063
2018-01-01 19:03:21		-0.48	-2.313	0.02	0.25	0.02	-0.125
2018-01-01 20:02:50		-0.43	-2.125	0.01	0.25	0.02	-0.063
2018-01-01 22:02:46		-0.29	-1.063	0.03	0.188	0.02	-0.063
2018-01-01 23:02:42		-0.22	-0.5	0.01	0.188	0.02	-0.063
2018-01-02 00:02:47		-0.18	-0.188	0.02	0.188	0.02	-0.063
2018-01-02 01:02:42		-0.12	0.188	0	0.188	0.02	-0.063
2018-01-02 02:02:55		-0.13	0.25	0.01	0.188	0.02	-0.063
2018-01-02 03:02:43		-0.16	0.063	0.01	0.188	0.02	-0.063
2018-01-02 04:02:43		-0.2	-0.125	0.01	0.063	0.01	0
2018-01-02 05:02:46		-0.2	-0.25	-0.01	0.125	0.02	-0.063
2018-01-02 06:02:42		-0.21	-0.375	0	0.063	0.03	-0.063
2018-01-02 07:02:45		-0.21	-0.375	0	0.063	0.02	-0.063
2018-01-02 08:02:49		-0.22	-0.438	0	0.063	0.02	-0.063
2018-01-02 09:02:45		-0.22	-0.563	0	0.063	0.01	0
2018-01-02 10:02:48		-0.25	-0.688	-0.01	0.063	0.02	0
2018-01-02 11:02:47		-0.3	-1.063	-0.01	0.063	0.02	0
2018-01-02 12:02:44		-0.33	-1.375	-0.01	0.125	0.01	0
2018-01-02 13:05:21		-0.38	-1.813	0	0	0.01	0
2018-01-02 14:02:59		-0.38	-2	0	0	0.02	0
2018-01-02 15:03:29		-0.35	-1.875	-0.02	0.063	0.01	0
2018-01-02 16:02:46		-0.33	-1.688	-0.02	0	0.03	-0.063
2018-01-02 17:02:43		-0.3	-1.5	-0.01	0	0.02	0
2018-01-02 18:03:47		-0.3	-1.5	-0.01	0	0.02	0
2018-01-02 19:02:33		-0.31	-1.5	-0.02	0	0.02	0
2018-01-02 20:03:19		-0.31	-1.688	-0.01	-0.063	0.01	0
2018-01-02 21:02:50		-0.32	-1.688	-0.01	-0.063	0.01	0
2018-01-02 22:02:49		-0.32	-1.688	-0.03	-0.063	0.01	0
2018-01-02 23:02:43		-0.32	-1.688	-0.03	0	0.01	0
2018-01-03 00:02:43		-0.3	-1.688	-0.03	-0.063	0.01	0
2018-01-03 01:02:44		-0.32	-1.813	-0.02	-0.125	0.01	0
2018-01-03 02:02:49		-0.31	-1.938	-0.03	-0.125	0.01	0
2018-01-03 03:02:44		-0.3	-1.938	-0.03	-0.125	0.01	0
2018-01-03 04:02:45		-0.28	-1.938	-0.03	-0.125	0.01	0
2018-01-03 05:02:44		-0.26	-1.813	-0.03	-0.188	0.01	0
2018-01-03 06:02:45		-0.24	-1.688	-0.04	-0.125	0	0
2018-01-03 07:03:16		-0.23	-1.688	-0.02	-0.188	0.01	0
2018-01-03 08:02:52		-0.22	-1.563	-0.04	-0.188	0.02	-0.063
2018-01-03 09:03:11		-0.2	-1.375	-0.04	-0.25	0.01	0
2018-01-03 10:02:47		-0.19	-1.313	-0.03	-0.25	0	0
2018-01-03 11:03:19		-0.2	-1.375	-0.05	-0.188	0	0
2018-01-03 12:02:55		-0.2	-1.563	-0.04	-0.25	0.03	-0.063
2018-01-03 13:02:47		-0.19	-1.625	-0.06	-0.25	0.01	0
2018-01-03 14:02:49		-0.19	-1.688	-0.05	-0.25	0.01	-0.063
2018-01-03 15:02:45		-0.17	-1.625	-0.06	-0.25	0.02	-0.063
2018-01-03 16:03:03		-0.14	-1.563	-0.05	-0.25	0.01	-0.063
2018-01-03 17:02:45		-0.12	-1.5	-0.05	-0.313	0.01	-0.063
2018-01-03 18:02:46		-0.09	-1.25	-0.05	-0.313	0	0
2018-01-03 19:02:45		-0.06	-1.125	-0.05	-0.313	0	-0.063
2018-01-03 20:04:04		-0.03	-0.938	-0.07	-0.25	0	-0.063
2018-01-03 21:02:44		-0.02	-0.813	-0.07	-0.25	-0.01	-0.063
2018-01-03 22:02:42		0.01	-0.813	-0.06	-0.313	0	-0.063
2018-01-03 23:02:45		0.04	-1.25	-0.05	-0.375	-0.01	-0.063
2018-01-04 00:02:47		0.02	-0.625	-0.06	-0.313	-0.01	-0.063
2018-01-04 01:02:43		0.06	-0.313	-0.06	-0.313	0	-0.063
2018-01-04 02:02:50		0.08	-0.063	-0.06	-0.313	-0.01	-0.063
2018-01-04 03:02:46		0.13	-0.625	-0.06	-0.375	-0.01	-0.063
2018-01-04 04:02:43		0.15	-1.25	-0.06	-0.313	-0.01	-0.063
2018-01-04 05:02:43		0.15	-1.438	-0.05	-0.313	-0.01	-0.125
2018-01-04 06:02:44		0.14	-1.5	-0.06	-0.313	-0.01	-0.125
2018-01-04 07:02:44		0.15	-1.563	-0.05	-0.375	-0.02	-0.063
2018-01-04 08:02:47		0.15	-1.75	-0.05	-0.375	-0.02	-0.063
2018-01-04 10:04:10		0.09	-0.813	-0.06	-0.313	-0.01	-0.125
2018-01-04 10:04:10		0.09	-0.5	-0.06	-0.313	0	-0.125
2018-01-04 11:02:28		0.08	-0.25	-0.05	-0.313	0	-0.125
2018-01-04 12:03:23		0.1	0	-0.06	-0.375	-0.02	-0.063
2018-01-04 13:02:55		0.15	0.188	-0.04	-0.25	0	-0.125
2018-01-04 14:02:51		0.26	0.375	-0.05	-0.313	-0.02	-0.063
2018-01-04 15:02:46		0.39	0.438	-0.04	-0.313	-0.02	-0.063
2018-01-04 16:02:44		0.49	0.375	-0.04	-0.313	-0.02	-0.063
2018-01-04 17:02:44		0.55	-0.063	-0.04	-0.25	-0.01	-0.125
2018-01-04 18:02:50		0.58	-0.813	-0.05	-0.313	-0.01	-0.188
2018-01-04 19:02:46		0.59	-1.188	-0.05	-0.313	-0.03	-0.063
2018-01-04 20:02:48		0.58	-1.375	-0.04	-0.313	-0.02	-0.125
2018-01-04 21:02:45		0.58	-1.688	-0.04	-0.313	0	-0.125
2018-01-04 22:02:44		0.53	-1.75	-0.05	-0.25	-0.02	-0.125
2018-01-04 23:02:44		0.43	-1.25	-0.05	-0.25	-0.01	-0.125
2018-01-05 00:02:45		0.35	-1.938	-0.05	-0.313	-0.01	-0.125
2018-01-05 01:02:47		0.22	-1.563	-0.04	-0.313	-0.02	-0.125
2018-01-05 02:02:47		0.15	-1.313	-0.04	-0.313	-0.01	-0.125
2018-01-05 03:02:42		0.09	-0.688	-0.04	-0.25	-0.01	-0.125
2018-01-05 04:02:45		0.04	0.063	-0.07	-0.25	-0.01	-0.188
2018-01-05 05:02:45		0.01	0.438	-0.06	-0.313	-0.01	-0.125
2018-01-05 06:02:46		0.04	0.563	-0.05	-0.313	-0.01	-0.125
2018-01-05 07:02:43		0.04	0.75	-0.06	-0.25	0	-0.188
2018-01-05 08:02:56		0.06	1	-0.06	-0.25	-0.01	-0.125
2018-01-05 09:02:44		0.13	0.125	-0.05	-0.25	-0.02	-0.125
2018-01-05 10:02:43		0.19	-0.313	-0.04	-0.313	-0.02	-0.125
2018-01-05 11:03:17		0.28	-0.563	-0.04	-0.313	-0.02	-0.125
2018-01-05 12:02:57		0.33	-0.75	-0.04	-0.25	-0.02	-0.188
2018-01-05 13:03:09		0.37	-0.813	-0.05	-0.375	-0.02	-0.188
2018-01-05 14:02:52		0.33	-0.875	-0.04	-0.313	-0.02	-0.188
2018-01-05 15:02:45		0.26	-0.875	-0.04	-0.313	-0.02	-0.188
2018-01-05 16:04:14		0.19	-0.75	-0.05	-0.375	-0.02	-0.188
2018-01-05 17:02:51		0.16	-0.25	-0.05	-0.375	-0.03	-0.125
2018-01-05 18:02:45		0.15	0.438	-0.04	-0.313	-0.02	-0.125
2018-01-05 19:02:45		0.15	0.875	-0.04	-0.313	0	-0.188
2018-01-05 20:02:49		0.16	1.125	-0.05	-0.313	0	-0.188
2018-01-05 21:02:42		0.19	1.375	-0.05	-0.313	-0.01	-0.188
2018-01-05 22:02:44		0.24	1.563	-0.04	-0.313	-0.01	-0.188
2018-01-05 23:02:45		0.32	1.688	-0.03	-0.375	-0.01	-0.188
2018-01-06 00:02:45		0.44	1.813	-0.04	-0.313	-0.01	-0.188
2018-01-06 01:02:45		0.57	1.375	-0.05	-0.313	-0.01	-0.188
2018-01-06 02:02:49		0.63	1.125	-0.05	-0.313	-0.02	-0.188
2018-01-06 03:02:46		0.65	1.25	-0.05	-0.313	-0.02	-0.188
2018-01-06 04:02:45		0.71	1.188	-0.03	-0.313	-0.02	-0.125
2018-01-06 05:02:45		0.73	1.063	-0.04	-0.25	-0.02	-0.188
2018-01-06 06:02:48		0.72	1	-0.04	-0.313	-0.03	-0.188
2018-01-06 07:02:46		0.72	0.875	-0.04	-0.313	-0.03	-0.188
2018-01-06 08:02:49		0.71	0.813	-0.03	-0.313	-0.04	-0.188
2018-01-06 09:02:42		0.7	0.75	-0.03	-0.313	-0.03	-0.188
2018-01-06 10:02:50		0.66	0.75	-0.03	-0.313	-0.03	-0.188
2018-01-06 11:02:43		0.63	0.75	-0.05	-0.25	-0.04	-0.188
2018-01-06 12:02:44		0.59	0.813	-0.04	-0.25	-0.04	-0.125
2018-01-06 13:02:53		0.58	0.75	-0.04	-0.188	-0.04	-0.125
2018-01-06 14:03:33		0.61	0.75	-0.04	-0.25	-0.03	-0.188
2018-01-06 15:02:28		0.68	0.563	-0.04	-0.25	-0.03	-0.188
2018-01-06 16:02:58		0.78	0.563	-0.03	-0.188	-0.03	-0.188
2018-01-06 17:02:43		0.87	0.438	-0.03	-0.188	-0.03	-0.188
2018-01-06 18:02:46		0.95	0.313	-0.03	-0.188	-0.02	-0.25
2018-01-06 19:02:43		1.03	0.125	-0.03	-0.188	-0.04	-0.188
2018-01-06 20:02:48		1.08	0.063	-0.03	-0.188	-0.05	-0.125
2018-01-06 21:02:44		1.1	0.125	-0.02	-0.188	-0.04	-0.188
2018-01-06 22:02:43		1.13	0.063	-0.03	-0.188	-0.03	-0.188
2018-01-06 23:02:46		1.16	-0.063	-0.04	-0.188	-0.03	-0.188
2018-01-07 00:02:44		1.14	-0.125	-0.03	-0.188	-0.04	-0.188
2018-01-07 01:02:44		1.12	-0.25	-0.02	-0.125	-0.04	-0.188
2018-01-07 02:02:48		1.11	-0.313	-0.02	-0.125	-0.03	-0.188
2018-01-07 03:02:44		1.09	-0.438	-0.02	-0.188	-0.04	-0.188
2018-01-07 04:02:44		1.04	-0.563	-0.03	-0.188	-0.03	-0.25
2018-01-07 05:02:44		1	-0.688	-0.03	-0.188	-0.03	-0.188
2018-01-07 06:02:44		0.94	-0.75	-0.03	-0.125	-0.04	-0.188
2018-01-07 07:02:44		0.87	-0.688	-0.03	-0.188	-0.03	-0.188
2018-01-07 08:02:48		0.8	-0.75	-0.03	-0.125	-0.03	-0.188
2018-01-07 09:02:52		0.72	-0.875	-0.04	-0.188	-0.02	-0.188
2018-01-07 10:02:55		0.68	-0.875	-0.05	-0.125	-0.03	-0.25
2018-01-07 11:02:45		0.68	-0.813	-0.03	-0.188	-0.01	-0.25
2018-01-07 12:02:45		0.78	-0.625	-0.04	-0.188	-0.02	-0.188
2018-01-07 13:02:46		0.9	-0.063	-0.03	-0.188	-0.02	-0.25
2018-01-07 14:02:55		0.96	0.563	-0.04	-0.125	-0.02	-0.188
2018-01-07 15:02:51		0.94	1.125	-0.03	-0.188	-0.02	-0.188
2018-01-07 16:02:46		0.83	1.125	-0.04	-0.188	-0.02	-0.188
2018-01-07 17:03:45		0.67	0.688	-0.04	-0.188	-0.03	-0.188
2018-01-07 18:03:22		0.5	0.125	-0.05	-0.188	-0.04	-0.125
2018-01-07 19:03:06		0.35	-0.188	-0.04	-0.25	-0.03	-0.188
2018-01-07 20:02:49		0.24	-0.375	-0.04	-0.188	-0.02	-0.188
2018-01-07 21:02:43		0.13	-0.625	-0.04	-0.25	-0.04	-0.125
2018-01-07 22:02:45		-0.03	-0.813	-0.03	-0.25	-0.03	-0.188
2018-01-07 23:02:45		-0.22	-1	-0.04	-0.188	-0.03	-0.188
2018-01-08 00:02:46		-0.48	-1.063	-0.04	-0.188	-0.04	-0.188
2018-01-08 01:02:47		-0.82	-1.25	-0.04	-0.25	-0.04	-0.188
2018-01-08 02:02:47		-1.32	-1.438	-0.04	-0.25	-0.04	-0.188
2018-01-08 03:02:43		-1.88	-1.625	-0.05	-0.188	-0.04	-0.188
2018-01-08 04:02:45		-2.43	-1.688	-0.03	-0.25	-0.05	-0.125
2018-01-08 05:02:43		-3	-1.938	-0.05	-0.188	-0.05	-0.125
2018-01-08 06:02:43		-3.62	-1.938	-0.04	-0.25	-0.02	-0.188
2018-01-08 07:02:46		-4.15	-1.938	-0.05	-0.188	-0.02	-0.188
2018-01-08 08:02:48		-4.53	-1.813	-0.05	-0.25	-0.02	-0.188
2018-01-08 09:02:44		-4.5	-1.25	-0.04	-0.188	-0.03	-0.188
2018-01-08 10:02:51		-4.2	-1	-0.04	-0.25	-0.03	-0.125
2018-01-08 11:02:52		-3.85	-0.938	-0.05	-0.188	-0.03	-0.125
2018-01-08 13:02:55		-3.39	-1	-0.03	-0.25	-0.03	-0.188
2018-01-08 13:02:55		-2.74	-1.5	-0.04	-0.313	-0.01	-0.188
2018-01-08 14:02:48		-1.78	-1.938	-0.04	-0.25	-0.02	-0.188
2018-01-08 15:03:38		-0.82	-1.438	-0.05	-0.25	-0.02	-0.188
2018-01-08 16:02:28		-0.03	-0.938	-0.04	-0.25	-0.03	-0.188
2018-01-08 17:02:49		0.35	-0.563	-0.05	-0.313	-0.02	-0.188
2018-01-08 18:02:47		0.37	-0.438	-0.04	-0.25	-0.03	-0.188
2018-01-08 19:02:46		0.39	-0.375	-0.05	-0.25	-0.01	-0.188
2018-01-08 20:02:49		0.4	-0.313	-0.04	-0.313	-0.03	-0.188
2018-01-08 21:02:45		0.42	-0.125	-0.06	-0.25	-0.02	-0.188
2018-01-08 22:02:48		0.48	0	-0.05	-0.313	-0.02	-0.188
2018-01-08 23:02:45		0.56	0.063	-0.05	-0.313	-0.04	-0.188
2018-01-09 00:02:45		0.66	0	-0.05	-0.313	-0.02	-0.188
2018-01-09 01:02:49		0.69	-0.063	-0.06	-0.313	-0.02	-0.188
2018-01-09 02:02:49		0.67	0	-0.05	-0.375	-0.03	-0.188
2018-01-09 03:02:46		0.51	0.063	-0.05	-0.375	-0.03	-0.188
2018-01-09 04:02:42		0.28	0.125	-0.06	-0.313	-0.01	-0.25
2018-01-09 05:02:45		0.03	0.25	-0.05	-0.375	-0.03	-0.188
2018-01-09 06:02:46		-0.1	0.188	-0.06	-0.313	-0.03	-0.188
2018-01-09 07:02:48		-0.12	-0.063	-0.05	-0.375	-0.03	-0.188
2018-01-09 08:02:52		-0.15	0	-0.05	-0.375	-0.03	-0.188
2018-01-09 09:02:45		-0.11	0	-0.06	-0.375	-0.03	-0.188
2018-01-09 10:02:43		-0.09	0.125	-0.06	-0.313	-0.01	-0.25
2018-01-09 11:03:45		-0.03	0.125	-0.05	-0.375	-0.03	-0.188
2018-01-09 12:02:44		0.13	0.125	-0.05	-0.375	-0.01	-0.25
2018-01-09 13:02:44		0.35	0.188	-0.05	-0.313	-0.05	-0.125
2018-01-09 14:02:51		0.45	0.813	-0.05	-0.375	-0.04	-0.125
2018-01-09 15:02:43		0.44	0.938	-0.05	-0.375	-0.03	-0.188
2018-01-09 16:02:43		0.29	0.813	-0.06	-0.375	-0.02	-0.188
2018-01-09 17:02:43		0.07	0.563	-0.04	-0.313	-0.03	-0.188
2018-01-09 18:02:46		0.02	0.063	-0.05	-0.375	-0.03	-0.25
2018-01-09 19:02:44		-0.02	-0.25	-0.06	-0.313	-0.05	-0.25
2018-01-09 20:02:48		-0.08	-0.375	-0.06	-0.313	-0.04	-0.25
2018-01-09 21:02:44		-0.2	-0.688	-0.04	-0.375	-0.04	-0.25
2018-01-09 22:02:45		-0.42	-0.438	-0.06	-0.313	-0.05	-0.188
2018-01-09 23:02:45		-0.72	-0.375	-0.05	-0.313	-0.03	-0.188
2018-01-10 00:02:46		-1.1	-0.188	-0.06	-0.313	-0.04	-0.188
2018-01-10 01:02:46		-1.36	0.063	-0.05	-0.313	-0.04	-0.188
2018-01-10 02:02:48		-1.44	0.125	-0.07	-0.25	-0.03	-0.188
2018-01-10 03:02:44		-1.41	-0.063	-0.06	-0.25	-0.02	-0.188
2018-01-10 04:02:45		-1.29	0.125	-0.06	-0.25	-0.03	-0.188
2018-01-10 05:02:46		-0.96	0.125	-0.05	-0.25	-0.02	-0.25
2018-01-10 06:02:45		-0.6	0.125	-0.05	-0.313	-0.03	-0.188
2018-01-10 07:02:45		-0.37	0.25	-0.05	-0.25	-0.04	-0.188
2018-01-10 08:02:49		-0.22	0.125	-0.05	-0.25	-0.02	-0.25
2018-01-10 09:02:51		-0.31	-0.125	-0.05	-0.25	-0.03	-0.188
2018-01-10 10:02:53		-0.46	-0.313	-0.04	-0.25	-0.04	-0.188
2018-01-10 11:02:48		-0.63	-0.313	-0.04	-0.313	-0.03	-0.25
2018-01-10 12:02:45		-0.89	-0.313	-0.05	-0.25	-0.04	-0.188
2018-01-10 13:02:43		-1.26	-0.375	-0.06	-0.25	-0.03	-0.25
2018-01-10 14:03:45		-1.61	-1.063	-0.04	-0.25	-0.01	-0.313
2018-01-10 15:03:00		-1.82	-1.75	-0.04	-0.188	-0.05	-0.188
2018-01-10 16:03:04		-1.81	-1.875	-0.03	-0.188	-0.05	-0.188
2018-01-10 17:02:46		-1.67	-1.813	-0.05	-0.188	-0.05	-0.25
2018-01-10 18:02:44		-1.59	-1.375	-0.04	-0.25	-0.04	-0.188
2018-01-10 19:02:49		-1.75	-1	-0.03	-0.25	-0.03	-0.125
2018-01-10 20:02:50		-2.15	-1.063	-0.03	-0.25	-0.03	-0.188
2018-01-10 21:02:47		-2.86	-0.938	-0.05	-0.188	-0.04	-0.188
2018-01-10 22:02:43		-3.55	-1.313	-0.04	-0.25	-0.05	-0.188
2018-01-10 23:02:43		-4.03	-1.438	-0.04	-0.25	-0.04	-0.188
2018-01-11 00:02:43		-4.14	-1.625	-0.03	-0.25	-0.02	-0.25
2018-01-11 01:02:45		-4.08	-1.75	-0.03	-0.25	-0.03	-0.25
2018-01-11 02:02:48		-3.98	-1.938	-0.03	-0.25	-0.02	-0.25
2018-01-11 03:02:44		-3.78	-1.813	-0.03	-0.25	-0.02	-0.25
2018-01-11 04:02:44		-3.55	-2.063	-0.04	-0.313	-0.04	-0.188
2018-01-11 05:02:44		-3.43	-2.063	-0.04	-0.313	-0.03	-0.188
2018-01-11 06:02:47		-3.36	-2.188	-0.04	-0.25	-0.03	-0.188
2018-01-11 07:02:47		-3.3	-2.25	-0.04	-0.25	-0.03	-0.188
2018-01-11 08:02:58		-3.24	-2.188	-0.05	-0.313	-0.04	-0.188
2018-01-11 09:02:42		-3.1	-1.5	-0.05	-0.313	-0.02	-0.25
2018-01-11 10:02:51		-2.85	-1	-0.07	-0.313	-0.04	-0.125
2018-01-11 11:02:54		-2.63	-0.688	-0.06	-0.25	-0.03	-0.188
2018-01-11 12:04:05		-2.48	-0.563	-0.05	-0.25	-0.03	-0.188
2018-01-11 13:02:26		-2.42	-0.375	-0.05	-0.25	-0.02	-0.188
2018-01-11 14:02:47		-2.47	-0.375	-0.05	-0.313	-0.05	-0.188
2018-01-11 15:03:21		-2.48	-0.563	-0.05	-0.313	-0.01	-0.188
2018-01-11 16:02:46		-2.37	-0.75	-0.05	-0.313	-0.02	-0.188
2018-01-11 17:02:45		-2.27	-0.563	-0.05	-0.313	-0.02	-0.125
2018-01-11 18:02:50		-2.35	-0.125	-0.05	-0.25	-0.02	-0.188
2018-01-11 19:02:42		-2.3	0.125	-0.05	-0.313	-0.03	-0.25
2018-01-11 20:02:50		-2.05	0.438	-0.05	-0.313	-0.03	-0.188
2018-01-11 21:02:49		-1.59	0.563	-0.05	-0.313	-0.03	-0.188
2018-01-11 22:02:46		-1.22	0.563	-0.05	-0.25	-0.01	-0.188
2018-01-11 23:02:46		-0.92	0.813	-0.04	-0.313	-0.01	-0.25
2018-01-12 00:02:46		-0.65	1	-0.05	-0.313	-0.03	-0.188
2018-01-12 01:02:47		-0.44	1.125	-0.06	-0.313	-0.04	-0.125
2018-01-12 02:02:47		-0.26	1.313	-0.05	-0.313	-0.04	-0.188
2018-01-12 03:02:43		-0.03	1.375	-0.05	-0.313	-0.04	-0.188
2018-01-12 04:02:44		0.16	1.438	-0.05	-0.25	-0.03	-0.188
2018-01-12 05:02:44		0.3	1.5	-0.05	-0.313	-0.03	-0.188
2018-01-12 06:02:44		0.44	1.563	-0.05	-0.313	-0.03	-0.188
2018-01-12 07:02:45		0.52	1.5	-0.06	-0.313	-0.02	-0.25
2018-01-12 08:02:48		0.5	1.25	-0.06	-0.25	-0.05	-0.125
2018-01-12 09:02:52		0.52	0.625	-0.05	-0.313	-0.04	-0.188
2018-01-12 10:02:46		0.5	0.438	-0.04	-0.313	-0.02	-0.25
2018-01-12 11:04:57		0.49	0.375	-0.05	-0.313	-0.04	-0.188
2018-01-12 12:03:04		0.45	0.25	-0.06	-0.313	-0.04	-0.188
2018-01-12 13:02:49		0.55	0.313	-0.05	-0.313	-0.04	-0.188
2018-01-12 14:02:54		0.94	0.438	-0.06	-0.25	-0.03	-0.188
2018-01-12 16:02:45		1.35	0.5	-0.06	-0.313	-0.04	-0.25
2018-01-12 16:02:45		1.51	0.438	-0.06	-0.25	-0.04	-0.188
2018-01-12 17:02:52		1.77	0.438	-0.05	-0.313	-0.04	-0.25
2018-01-12 18:02:46		2.06	0.313	-0.06	-0.313	-0.04	-0.188
2018-01-12 19:03:16		2.14	0.188	-0.06	-0.25	-0.04	-0.188
2018-01-12 20:03:00		2.24	0.25	-0.06	-0.25	-0.04	-0.188
2018-01-12 21:02:46		2.49	0.375	-0.04	-0.313	-0.03	-0.188
2018-01-12 22:02:42		2.97	0.688	-0.05	-0.313	-0.03	-0.25
2018-01-12 23:02:46		3.5	0.625	-0.06	-0.25	-0.05	-0.188
2018-01-13 00:02:44		3.85	0.75	-0.05	-0.25	-0.04	-0.188
2018-01-13 01:02:43		4.15	0.813	-0.05	-0.25	-0.02	-0.25
2018-01-13 02:02:50		4.4	0.938	-0.05	-0.25	-0.04	-0.188
2018-01-13 03:03:02		4.67	1.125	-0.04	-0.313	-0.04	-0.25
2018-01-13 04:02:43		4.85	1.25	-0.04	-0.25	-0.04	-0.25
2018-01-13 05:02:46		5.02	1.438	-0.03	-0.25	-0.05	-0.188
2018-01-13 06:02:46		5.13	1.563	-0.03	-0.25	-0.05	-0.188
2018-01-13 07:02:46		5.21	1.75	-0.03	-0.25	-0.05	-0.188
2018-01-13 08:02:51		5.29	1.938	-0.02	-0.25	-0.04	-0.25
2018-01-13 09:02:44		5.1	1.688	-0.02	-0.188	-0.05	-0.188
2018-01-13 10:02:49		4.87	1.25	-0.02	-0.188	-0.05	-0.25
2018-01-13 11:02:45		5.08	1.063	-0.02	-0.188	-0.05	-0.25
2018-01-13 12:03:42		5.8	1.875	-0.03	-0.188	-0.05	-0.25
2018-01-13 13:03:00		6.17	2.938	-0.03	-0.188	-0.04	-0.25
2018-01-13 14:03:58		5.52	3.813	-0.03	-0.188	-0.05	-0.188
2018-01-13 15:02:55		4.38	4.5	-0.03	-0.188	-0.06	-0.188
2018-01-13 16:02:56		3.43	4.75	-0.04	-0.188	-0.05	-0.25
2018-01-13 17:02:46		2.7	4.438	-0.03	-0.125	-0.05	-0.188
2018-01-13 21:02:44		2.33	3.75	-0.02	-0.125	-0.06	-0.188
2018-01-13 21:02:45		2.26	2.875	-0.03	-0.125	-0.05	-0.188
2018-01-13 21:02:49		2.28	2.063	-0.02	-0.188	-0.04	-0.25
2018-01-13 21:02:49		2.35	1.25	-0.04	-0.063	-0.05	-0.25
2018-01-13 22:02:44		2.37	0.5	-0.03	-0.063	-0.06	-0.188
2018-01-14 00:02:45		2.29	0.25	-0.03	-0.063	-0.05	-0.188
2018-01-14 00:02:45		2.12	0.063	-0.04	0	-0.05	-0.188
2018-01-14 03:02:45		1.85	-0.063	-0.02	0	-0.06	-0.25
2018-01-14 03:02:45		1.59	-0.125	-0.01	0	-0.04	-0.25
2018-01-14 03:02:49		1.2	-0.188	-0.03	0.063	-0.05	-0.125
2018-01-14 04:02:46		0.82	-0.25	-0.01	0	-0.05	-0.125
2018-01-14 08:02:51		0.44	-0.313	-0.02	0.063	-0.04	-0.25
2018-01-14 08:02:51		0.06	-0.313	-0.02	0.125	-0.05	-0.25
2018-01-14 08:02:56		-0.3	-0.313	-0.01	0.063	-0.05	-0.188
2018-01-14 08:02:56		-0.57	-0.313	-0.01	0.125	-0.04	-0.188
2018-01-14 09:02:43		-0.6	-0.188	-0.01	0.125	-0.05	-0.188
2018-01-14 11:02:43		-0.5	0	-0.01	0.063	-0.06	-0.125
2018-01-14 11:02:43		-0.49	0	-0.01	0.125	-0.05	-0.125
2018-01-14 20:02:49		-0.48	-0.813	0	0.125	-0.04	-0.188
2018-01-14 20:02:49		-0.27	-0.5	0	0.125	-0.04	-0.188
2018-01-14 20:02:53		-0.28	-0.125	0	0.125	-0.04	-0.188
2018-01-14 20:02:53		-0.22	0.563	0	0.125	-0.03	-0.125
2018-01-14 20:02:57		-0.21	0.688	0.01	0.063	-0.04	-0.188
2018-01-14 20:02:57		-0.17	1	0	0.063	-0.03	-0.188
2018-01-14 20:03:02		-0.12	1.25	0	0.125	-0.02	-0.188
2018-01-14 20:03:02		-0.11	1.188	0.01	0.125	-0.03	-0.188
2018-01-14 20:03:06		-0.11	1.188	0	0.188	-0.03	-0.125
2018-01-14 21:02:43		-0.05	1.813	0.01	0.188	-0.01	-0.188
2018-01-14 22:02:43		0.03	2.438	0.01	0.188	-0.03	-0.125
2018-01-14 23:02:43		0.13	2.75	0.02	0.188	-0.03	-0.125
2018-01-15 00:02:43		0.31	2.875	0.03	0.188	-0.03	-0.125
2018-01-15 02:02:48		0.57	3.063	0.03	0.188	-0.03	-0.063
2018-01-15 02:02:48		0.9	3.063	0.01	0.25	-0.03	-0.063
2018-01-15 03:02:45		1.27	3.125	0.03	0.25	-0.03	-0.125
2018-01-15 04:02:44		1.71	3.188	0.02	0.25	-0.02	-0.125
2018-01-15 05:02:44		2.17	3.063	0.02	0.313	-0.01	-0.125
2018-01-15 06:02:45		2.65	3.125	0.03	0.25	-0.01	-0.125
2018-01-15 15:02:45		3.16	3.125	0.03	0.375	-0.02	-0.125
2018-01-15 15:02:45		3.61	3.125	0.03	0.313	-0.01	-0.125
2018-01-15 15:02:50		3.77	2.938	0.04	0.313	0	-0.125
2018-01-15 15:02:50		3.55	2.938	0.04	0.375	0	-0.125
2018-01-15 15:02:54		2.82	2.813	0.03	0.375	0	-0.125
2018-01-15 15:02:54		1.48	2.688	0.04	0.375	-0.02	-0.063
2018-01-15 15:02:58		0.12	1.5	0.04	0.375	-0.02	-0.063
2018-01-15 15:02:58		-0.31	1	0.04	0.438	-0.01	-0.063
2018-01-15 15:03:03		-0.43	0	0.04	0.5	-0.02	-0.063
2018-01-15 16:02:49		-0.44	-0.313	0.05	0.5	-0.01	-0.063
2018-01-15 17:02:57		-0.45	-0.5	0.04	0.563	-0.01	-0.063
2018-01-15 18:02:54		-0.45	-0.563	0.05	0.5	-0.01	-0.063
2018-01-15 19:02:48		-0.43	-0.5	0.05	0.563	0	-0.063
2018-01-15 20:02:54		-0.42	-0.563	0.05	0.563	-0.02	0
2018-01-15 21:02:45		-0.48	-1	0.06	0.5	-0.02	0
2018-01-15 22:02:46		-0.52	-1.688	0.07	0.563	-0.01	0
2018-01-15 23:02:42		-0.58	-1.938	0.06	0.563	0	-0.063
2018-01-16 00:02:45		-0.64	-2.25	0.05	0.563	-0.01	0
2018-01-16 01:02:45		-0.75	-2.5	0.06	0.563	0.01	-0.063
2018-01-16 02:02:49		-0.91	-2.563	0.07	0.5	0	-0.063
2018-01-16 03:02:42		-1.1	-2.688	0.05	0.563	0.01	-0.063
2018-01-16 04:02:46		-1.24	-2.438	0.06	0.563	0.01	-0.063
2018-01-16 05:02:46		-1.22	-2.25	0.06	0.5	0	0
2018-01-16 06:02:46		-1.13	-2.25	0.06	0.5	0.01	0
2018-01-16 07:02:46		-1.04	-2.125	0.06	0.438	0.01	0.063
2018-01-16 08:02:50		-0.89	-2.063	0.05	0.438	0.01	0
2018-01-16 09:02:43		-0.73	-1.938	0.04	0.438	0	0.063
2018-01-16 10:02:43		-0.51	-1.875	0.04	0.438	0	0.063
2018-01-16 11:02:44		-0.35	-1.25	0.04	0.375	0	0.063
2018-01-16 12:02:43		-0.27	-0.875	0.03	0.375	0.01	0.063
2018-01-16 13:02:43		-0.29	-0.813	0.04	0.313	0.01	0.063
2018-01-16 14:02:48		-0.34	-1.313	0.04	0.25	0.01	0.063
2018-01-16 15:02:44		-0.36	-1.438	0.03	0.313	0.01	0.063
2018-01-16 16:02:43		-0.36	-1.438	0.02	0.25	0.02	0.063
2018-01-16 17:02:43		-0.31	-1.125	0.04	0.188	0.02	0.063
2018-01-16 18:02:46		-0.21	-0.5	0.02	0.188	0.02	0.063
2018-01-16 19:02:43		-0.11	0.313	0.02	0.125	0.03	0.063
2018-01-16 20:02:48		-0.02	1	0.01	0.188	0.03	0
2018-01-16 21:02:44		0.02	1.313	0.01	0.188	0.01	0.125
2018-01-16 22:02:45		-0.02	1.313	0	0.125	0.02	0.063
2018-01-16 23:02:44		0	1.125	0	0.125	0.02	0.125
2018-01-17 00:02:44		0.05	1.25	0.02	0.063	0.04	0
2018-01-17 01:02:44		0.14	1.188	-0.01	0.125	0.02	0.125
2018-01-17 02:02:48		0.31	1.313	-0.01	0.125	0.02	0.125
2018-01-17 03:02:45		0.55	1.563	0.01	0.063	0.03	0.125
2018-01-17 04:02:44		0.74	1.563	0	0.063	0.01	0.125
2018-01-17 05:02:45		0.74	1.625	0.01	0.063	0.02	0.125
2018-01-17 06:02:45		0.68	1.688	0	0.125	0.01	0.125
2018-01-17 07:02:45		0.6	1.688	0	0.125	0.02	0.063
2018-01-17 08:02:50		0.46	1.563	0.01	0.125	0.02	0.125
2018-01-17 09:02:48		0.3	1.438	0.01	0.125	0.02	0.063
2018-01-17 10:02:48		0.09	1.438	0.01	0.125	0.02	0.063
2018-01-17 11:03:22		0.02	1.375	0.02	0.125	0.02	0.063
2018-01-17 12:03:05		0.05	1.75	0.01	0.125	0.03	0.063
2018-01-17 13:02:56		0.08	2	0	0.188	0.02	0.063
2018-01-17 14:02:59		0.1	2.188	0.01	0.188	0.02	0.063
2018-01-17 15:02:59		0.1	2.125	0.01	0.125	0.03	0
2018-01-17 16:02:42		0.09	2.063	0.02	0.188	0.02	0.125
2018-01-17 17:02:49		0.06	1.813	0	0.25	0.02	0.063
2018-01-17 18:02:44		0.02	1.563	0.01	0.25	0.02	0.063
2018-01-17 19:02:58		0.01	1.5	0.02	0.25	0.01	0.125
2018-01-17 20:02:47		-0.01	1.313	0.03	0.25	0.02	0.125
2018-01-17 21:02:43		-0.04	1	0.02	0.25	0.03	0.063
2018-01-17 22:02:46		0	1.313	0.03	0.25	0.03	0.063
2018-01-17 23:02:42		0.06	1.75	0.03	0.25	0.02	0.063
2018-01-18 00:02:44		0.08	1.938	0.02	0.313	0.02	0.125
2018-01-18 01:02:43		0.13	2.25	0.03	0.313	0.03	0.063
2018-01-18 02:02:50		0.11	2.125	0.03	0.313	0.02	0.063
2018-01-18 03:02:43		0.02	1.688	0.03	0.375	0.02	0.063
2018-01-18 04:02:43		-0.06	0.938	0.04	0.313	0.03	0.063
2018-01-18 05:02:44		-0.13	0.313	0.02	0.375	0.02	0.063
2018-01-18 06:02:44		-0.18	0.063	0.03	0.313	0.03	0.063
2018-01-18 07:02:45		-0.19	-0.188	0.03	0.313	0.03	0.063
2018-01-18 08:02:48		-0.2	-0.188	0.03	0.375	0.02	0.063
2018-01-18 09:02:44		-0.18	-0.063	0.03	0.375	0.01	0.125
2018-01-18 10:02:48		-0.13	0.313	0.03	0.375	0.03	0.063
2018-01-18 11:02:51		-0.08	0.625	0.03	0.375	0.03	0.063
2018-01-18 12:02:44		-0.05	0.875	0.03	0.438	0.03	0.063
2018-01-18 13:03:14		0.04	1.438	0.04	0.375	0.03	0.063
2018-01-18 14:03:26		0.09	2	0.04	0.375	0.02	0.125
2018-01-18 15:02:44		0.13	2.313	0.04	0.375	0.03	0.125
2018-01-18 16:02:46		0.12	2.375	0.02	0.375	0.02	0.063
2018-01-18 17:02:45		0.06	2.063	0.04	0.313	0.02	0.125
2018-01-18 18:03:01		-0.06	1.313	0.03	0.375	0.02	0.125
2018-01-18 19:02:41		-0.17	0.438	0.02	0.375	0.01	0.063
2018-01-18 20:02:48		-0.26	-0.375	0.02	0.375	0.02	0.063
2018-01-18 21:02:44		-0.3	-0.688	0.02	0.375	0.01	0.063
2018-01-18 22:02:44		-0.33	-1.063	0.02	0.375	0.02	0.063
2018-01-18 23:02:44		-0.4	-1.75	0.03	0.438	0.02	0.063
2018-01-19 00:02:42		-0.46	-2.188	0.03	0.438	0.01	0.063
2018-01-19 01:02:45		-0.52	-2.563	0.03	0.375	0.01	0.063
2018-01-19 02:02:49		-0.54	-2.875	0.04	0.375	0.02	0.125
2018-01-19 03:02:47		-0.54	-2.688	0.03	0.313	0.01	0.125
2018-01-19 04:02:45		-0.6	-2.438	0.02	0.438	0.01	0.125
2018-01-19 05:02:48		-0.71	-2.063	0.03	0.375	0.02	0.125
2018-01-19 06:02:46		-0.86	-1.813	0.02	0.375	0.01	0.125
2018-01-19 07:02:45		-0.88	-1.5	0.02	0.375	0	0.125
2018-01-19 08:02:53		-0.82	-1.313	0.02	0.313	0.04	0.125
2018-01-19 09:02:42		-0.72	-1.438	0.02	0.313	0.04	0.063
2018-01-19 10:03:04		-0.54	-1.75	0.02	0.313	0.02	0.188
2018-01-19 11:02:57		-0.41	-2	0.03	0.25	0.02	0.188
2018-01-19 12:02:45		-0.42	-2.125	0.03	0.188	0.02	0.188
2018-01-19 13:02:34		-0.36	-1.75	0.02	0.25	0.02	0.188
2018-01-19 14:04:10		-0.34	-1.688	-0.01	0.25	0.03	0.125
2018-01-19 15:03:20		-0.33	-1.625	0.01	0.188	0.03	0.125
2018-01-19 17:02:29		-0.31	-1.563	0.02	0.188	0.04	0.125
2018-01-19 17:02:29		-0.25	-1.25	0	0.188	0.03	0.125
2018-01-19 18:02:49		-0.18	-0.688	0.02	0.125	0.04	0.125
2018-01-19 19:03:04		-0.11	-0.188	0.01	0.125	0.03	0.188
2018-01-19 20:02:57		-0.03	0.625	0.01	0.063	0.04	0.125
2018-01-19 21:02:52		0.06	1.25	0.01	0.063	0.04	0.188
2018-01-19 22:02:46		0.1	1.75	0	0.125	0.04	0.125
2018-01-19 23:02:48		0.13	2.188	0.01	0	0.03	0.188
2018-01-20 00:02:43		0.16	2.313	0	0	0.05	0.125
2018-01-20 01:02:46		0.16	2.375	0	0	0.05	0.125
2018-01-20 02:02:51		0.17	2.563	-0.01	0.063	0.03	0.125
2018-01-20 03:02:44		0.23	2.625	-0.01	0.063	0.04	0.125
2018-01-20 04:02:43		0.33	2.813	0	0	0.04	0.125
2018-01-20 05:02:44		0.49	2.813	0	0	0.03	0.125
2018-01-20 06:02:44		0.68	2.688	-0.01	0.063	0.04	0.125
2018-01-20 07:02:44		0.7	2.625	-0.01	0.063	0.04	0.125
2018-01-20 08:02:48		0.67	2.5	-0.01	0.063	0.01	0.125
2018-01-20 09:02:41		0.55	2.563	0	0.063	0.02	0.125
2018-01-20 10:02:45		0.3	2.375	0	0.063	0.03	0.125
2018-01-20 11:02:44		0.05	1.813	-0.01	0.125	0.03	0.063
2018-01-20 12:02:51		-0.07	0.938	0	0.125	0.02	0.125
2018-01-20 13:03:22		-0.3	-0.688	0	0.125	0.02	0.063
2018-01-20 14:03:15		-0.44	-2	0.02	0.125	0.02	0.063
2018-01-20 15:04:06		-0.53	-2.75	0.01	0.188	0.01	0.125
2018-01-20 16:02:52		-0.53	-2.875	0.01	0.188	0.01	0.125
2018-01-20 17:02:41		-0.5	-2.688	0.02	0.188	0.02	0.125
2018-01-20 18:02:46		-0.41	-2.25	0.01	0.188	0.02	0.125
2018-01-20 19:02:46		-0.34	-1.75	0.02	0.25	0.03	0.063
2018-01-20 22:02:45		-0.3	-1.563	0.03	0.188	0.02	0.125
2018-01-20 22:02:45		-0.28	-1.313	0.02	0.25	0.04	0.063
2018-01-20 22:02:50		-0.24	-1.125	0.03	0.188	0.03	0.125
2018-01-20 23:02:45		-0.21	-0.938	0	0.25	0.03	0.063
2018-01-21 01:02:45		-0.18	-0.625	0.02	0.188	0.01	0.125
2018-01-21 01:02:45		-0.14	-0.375	0.01	0.188	0.02	0.125
2018-01-21 04:02:45		-0.13	-0.188	0.02	0.125	0.04	0.063
2018-01-21 04:02:45		-0.14	-0.25	0.02	0.125	0.02	0.125
2018-01-21 04:02:49		-0.14	-0.25	0.01	0.125	0.02	0.125
2018-01-21 05:02:45		-0.13	-0.25	0.01	0.125	0.02	0.125
2018-01-21 06:02:48		-0.14	-0.25	0.02	0.063	0.03	0.063
2018-01-21 07:02:48		-0.15	-0.438	0.02	0.063	0.03	0.063
2018-01-21 11:02:52		-0.18	-0.5	0.02	0.063	0.03	0.125
2018-01-21 11:02:52		-0.19	-0.688	0	0.125	0.03	0.125
2018-01-21 11:02:56		-0.19	-0.75	0.01	0.063	0.02	0.063
2018-01-21 11:02:56		-0.13	-0.313	0.01	0.063	0.03	0.125
2018-01-21 13:02:49		-0.02	0.5	0.01	0.063	0.03	0.063
2018-01-21 13:02:49		0.07	1.25	0	0.063	0.03	0.125
2018-01-21 15:02:49		0.1	1.688	0.01	0.063	0.03	0.125
2018-01-21 15:02:49		0.15	2.125	0	0.063	0.03	0.063
2018-01-21 21:02:49		0.09	1.75	0.01	0.063	0.02	0.063
2018-01-21 21:02:50		0.03	1.25	0	0.063	0.03	0.063
2018-01-21 21:02:54		-0.04	0.875	0	0.063	0.01	0.063
2018-01-21 21:02:54		-0.08	0.438	0.01	0	0.03	0.063
2018-01-21 21:02:58		-0.13	0.188	-0.01	0.125	0.02	0.063
2018-01-21 21:02:58		-0.17	-0.25	0	0.063	0	0.125
2018-01-21 22:02:50		-0.2	-0.5	0	0.063	0	0.125
2018-01-22 00:02:51		-0.24	-0.688	0.01	0.063	0.01	0.125
2018-01-22 00:02:51		-0.26	-1	0.01	0.063	0.01	0.125
2018-01-22 01:02:51		-0.3	-1.188	0.01	0.125	0	0.125
2018-01-22 02:02:55		-0.3	-1.375	0	0.125	0.01	0.125
2018-01-22 03:02:44		-0.32	-1.5	0	0.125	0.02	0.063
2018-01-22 05:02:44		-0.32	-1.563	0.01	0.125	0.02	0.063
2018-01-22 05:02:44		-0.34	-1.625	0.01	0.125	0.02	0.063
2018-01-22 06:02:44		-0.35	-1.688	0.01	0.125	0.01	0.125
2018-01-22 07:02:44		-0.35	-1.75	0	0.125	0.01	0.125
2018-01-22 09:02:44		-0.35	-1.813	0	0.125	0.01	0.063
2018-01-22 09:02:44		-0.36	-1.813	0.01	0.063	0.03	0.063
2018-01-22 13:02:45		-0.38	-1.938	0	0.125	0.03	0.063
2018-01-22 13:02:45		-0.44	-2.375	0	0.063	0.02	0.063
2018-01-22 13:02:49		-0.52	-3.125	-0.01	0.063	0.03	0.063
2018-01-22 13:02:49		-0.61	-3.813	0	0.063	0.01	0.125
2018-01-22 17:02:50		-0.64	-4.063	-0.02	0.063	0.03	0.063
2018-01-22 17:02:50		-0.66	-4.25	0	0	0.02	0.063
2018-01-22 17:02:54		-0.56	-3.563	-0.02	0	0.03	0.125
2018-01-22 17:02:54		-0.49	-3	-0.01	0	0.02	0.063
2018-01-22 22:02:49		-0.45	-2.813	-0.01	-0.063	0.04	0.063
2018-01-22 22:02:50		-0.47	-2.875	-0.02	-0.063	0.03	0.063
2018-01-22 22:02:53		-0.46	-2.875	-0.02	-0.125	0.02	0.125
2018-01-22 22:02:53		-0.45	-2.688	-0.01	-0.125	0.02	0.063
2018-01-22 22:02:57		-0.52	-2.813	-0.03	-0.125	0.03	0.063
2018-01-22 23:02:48		-0.7	-2.75	-0.04	-0.188	0.03	0.063
2018-01-23 00:02:49		-0.98	-2.625	-0.04	-0.188	0.03	0.063
2018-01-23 01:02:48		-1.31	-2.625	-0.04	-0.25	0.03	0.063
2018-01-23 02:02:53		-1.75	-2.375	-0.05	-0.25	0.02	0.063
2018-01-23 03:02:43		-1.98	-1.875	-0.04	-0.313	0.02	0.063
2018-01-23 04:02:47		-2.12	-1.625	-0.05	-0.313	0.03	0.063
2018-01-23 21:02:47		-2.24	-1.5	-0.06	-0.313	0.02	0.063
2018-01-23 21:02:48		-2.44	-1.438	-0.06	-0.313	0.03	0.063
2018-01-23 21:02:51		-2.61	-1.25	-0.05	-0.375	0.03	0.063
2018-01-23 21:02:52		-2.75	-1.125	-0.06	-0.375	0.02	0.063
2018-01-23 21:02:55		-2.79	-0.938	-0.06	-0.375	0.01	0.063
2018-01-23 21:02:56		-2.63	-0.813	-0.06	-0.438	0.01	0.063
2018-01-23 21:03:00		-2.23	-0.938	-0.06	-0.375	0.01	0.063
2018-01-23 21:03:00		-1.63	-1.063	-0.05	-0.438	0	0.063
2018-01-23 21:03:05		-0.97	-1.25	-0.05	-0.438	0.03	-0.063
2018-01-23 21:03:05		-0.14	-0.688	-0.05	-0.438	0	0.063
2018-01-23 21:03:10		0.07	-0.375	-0.07	-0.438	0.01	0.063
2018-01-23 21:03:10		0.04	-0.5	-0.07	-0.438	0.01	0
2018-01-23 21:03:13		0	-0.625	-0.07	-0.438	0	0.063
2018-01-23 21:03:14		-0.01	-0.563	-0.07	-0.438	-0.01	0.063
2018-01-23 21:03:17		0.02	-0.188	-0.07	-0.438	-0.01	0.063
2018-01-23 21:03:17		0.03	0	-0.06	-0.438	0	0
2018-01-23 21:03:22		0.04	0.125	-0.07	-0.5	0.01	0
2018-01-23 22:02:47		0.12	0.438	-0.06	-0.5	0	0
2018-01-23 23:02:50		0.31	0.438	-0.05	-0.438	0.01	-0.063
2018-01-24 00:02:51		0.55	0.5	-0.05	-0.5	-0.01	-0.063
2018-01-24 01:02:52		0.82	0.75	-0.05	-0.438	-0.01	-0.063
2018-01-24 02:02:52		1.17	0.688	-0.05	-0.438	-0.01	-0.063
2018-01-24 03:02:42		1.31	0.375	-0.06	-0.438	-0.01	-0.063
2018-01-24 06:02:45		1.35	0.313	-0.06	-0.438	-0.02	-0.063
2018-01-24 06:02:45		1.35	0.313	-0.05	-0.438	-0.01	-0.063
2018-01-24 06:02:49		1.42	0.375	-0.05	-0.438	-0.02	-0.063
2018-01-24 07:02:43		1.46	0.313	-0.05	-0.438	-0.02	-0.063
2018-01-24 17:02:46		1.49	0.313	-0.04	-0.438	0	-0.063
2018-01-24 17:02:47		1.46	0.188	-0.04	-0.438	-0.03	-0.063
2018-01-24 17:02:51		1.28	0.063	-0.04	-0.375	-0.02	-0.125
2018-01-24 17:02:51		0.98	0.063	-0.05	-0.375	-0.02	-0.125
2018-01-24 17:02:55		0.69	0.125	-0.06	-0.375	-0.01	-0.125
2018-01-24 17:02:55		0.78	1.313	-0.06	-0.375	-0.03	-0.063
2018-01-24 17:03:00		0.02	1.25	-0.05	-0.375	-0.02	-0.125
2018-01-24 17:03:00		-0.21	0.688	-0.04	-0.375	-0.02	-0.125
2018-01-24 17:03:05		-0.22	0.625	-0.03	-0.375	-0.03	-0.125
2018-01-24 17:03:05		-0.22	0.5	-0.04	-0.375	-0.02	-0.125
2018-01-24 18:02:47		-0.23	0.375	-0.04	-0.313	-0.01	-0.188
2018-01-24 21:02:48		-0.24	0.188	-0.05	-0.313	-0.02	-0.125
2018-01-24 21:02:48		-0.25	0	-0.04	-0.313	-0.03	-0.125
2018-01-24 21:02:52		-0.29	-0.375	-0.05	-0.25	-0.03	-0.125
2018-01-24 22:02:48		-0.43	-0.5	-0.04	-0.25	-0.03	-0.188
2018-01-24 23:02:47		-0.61	-0.375	-0.04	-0.25	-0.04	-0.125
2018-01-25 00:02:50		-0.84	-0.5	-0.06	-0.188	-0.02	-0.125
2018-01-25 03:02:47		-1.13	-0.75	-0.05	-0.25	-0.02	-0.125
2018-01-25 03:02:47		-1.55	-1.063	-0.04	-0.25	-0.03	-0.125
2018-01-25 03:02:52		-2.09	-1.25	-0.04	-0.25	-0.03	-0.125
2018-01-25 05:02:47		-2.69	-1.5	-0.04	-0.25	-0.03	-0.125
2018-01-25 05:02:47		-3.22	-1.75	-0.04	-0.25	-0.03	-0.125
2018-01-25 06:02:47		-3.62	-1.813	-0.05	-0.25	-0.03	-0.125
2018-01-25 07:02:52		-3.88	-1.75	-0.06	-0.188	-0.02	-0.188
2018-01-25 09:02:51		-4.08	-1.625	-0.06	-0.188	-0.04	-0.188
2018-01-25 09:02:51		-4.06	-1	-0.06	-0.25	-0.02	-0.188
2018-01-25 10:02:35		-3.79	-0.688	-0.06	-0.25	-0.03	-0.125
2018-01-25 11:02:35		-3.57	-0.563	-0.05	-0.25	-0.03	-0.125
2018-01-25 12:02:36		-3.27	-0.438	-0.04	-0.188	-0.04	-0.125
2018-01-25 13:02:41		-3	-1.375	-0.05	-0.188	-0.03	-0.125
2018-01-25 16:02:36		-1.89	-1.875	-0.04	-0.25	-0.03	-0.125
2018-01-25 16:02:36		-0.62	-1.25	-0.05	-0.188	-0.04	-0.125
2018-01-25 16:02:41		-0.07	-0.75	-0.06	-0.188	-0.02	-0.188
2018-01-25 22:02:53		0.01	-0.688	-0.04	-0.25	-0.03	-0.125
2018-01-25 22:02:53		0	-0.938	-0.04	-0.25	-0.04	-0.063
2018-01-25 22:02:57		-0.06	-1.125	-0.04	-0.25	-0.03	-0.188
2018-01-25 22:02:57		-0.21	-0.938	-0.05	-0.25	-0.02	-0.188
2018-01-25 22:03:02		-0.39	-0.375	-0.05	-0.313	-0.02	-0.188
2018-01-25 22:03:02		-0.44	-0.063	-0.06	-0.313	-0.03	-0.125
2018-01-25 23:02:52		-0.43	-0.063	-0.06	-0.313	-0.03	-0.125
2018-01-26 01:02:40		-0.35	0.188	-0.05	-0.313	-0.03	-0.125
2018-01-26 01:02:41		-0.13	0.375	-0.05	-0.313	-0.04	-0.125
2018-01-26 02:02:59		0.19	0.688	-0.04	-0.375	-0.01	-0.188
2018-01-26 04:02:28		0.64	0.938	-0.05	-0.25	-0.02	-0.188
2018-01-26 04:02:28		1.09	1.125	-0.05	-0.313	-0.02	-0.188
2018-01-26 06:02:44		1.48	1.375	-0.06	-0.313	-0.03	-0.188
2018-01-26 06:02:44		1.78	1.375	-0.05	-0.313	-0.03	-0.188
2018-01-26 16:02:45		1.97	1.375	-0.04	-0.313	-0.03	-0.125
2018-01-26 16:02:45		2.11	1.25	-0.04	-0.375	-0.04	-0.125
2018-01-26 16:02:51		2.05	0.625	-0.04	-0.313	-0.03	-0.125
2018-01-26 16:02:51		1.76	0.313	-0.04	-0.313	-0.04	-0.125
2018-01-26 16:02:55		1.49	0.125	-0.05	-0.313	-0.03	-0.125
2018-01-26 16:02:55		0.92	-0.125	-0.05	-0.313	-0.04	-0.188
2018-01-26 16:02:59		-0.01	-0.5	-0.05	-0.313	-0.05	-0.188
2018-01-26 16:02:59		-1.12	-0.813	-0.06	-0.25	-0.04	-0.188
2018-01-26 16:03:03		-2.31	-1.5	-0.04	-0.313	-0.04	-0.188
2018-01-26 16:03:03		-2.83	-2.125	-0.03	-0.313	-0.05	-0.125
2018-01-26 23:02:49		-2.86	-1.938	-0.04	-0.25	-0.04	-0.188
2018-01-26 23:02:49		-2.81	-1.25	-0.05	-0.25	-0.05	-0.188
2018-01-26 23:02:53		-2.75	-0.563	-0.04	-0.313	-0.05	-0.125
2018-01-26 23:02:53		-2.59	-0.375	-0.04	-0.313	-0.05	-0.125
2018-01-26 23:02:57		-2.38	-0.438	-0.03	-0.25	-0.05	-0.188
2018-01-26 23:02:57		-2.2	-0.438	-0.03	-0.25	-0.04	-0.188
2018-01-26 23:03:01		-2.04	-0.375	-0.04	-0.25	-0.04	-0.188
2018-01-27 00:02:49		-1.89	-0.75	-0.04	-0.313	-0.04	-0.188
2018-01-27 01:02:49		-1.96	-1.25	-0.04	-0.313	-0.04	-0.188
2018-01-27 02:02:53		-2.07	-1.5	-0.05	-0.25	-0.06	-0.125
2018-01-27 03:02:43		-2.15	-1.563	-0.04	-0.313	-0.06	-0.125
2018-01-27 04:02:43		-2.11	-1.5	-0.05	-0.25	-0.05	-0.125
2018-01-27 06:02:43		-1.92	-0.813	-0.04	-0.313	-0.04	-0.188
2018-01-27 06:02:43		-1.7	-0.688	-0.04	-0.25	-0.05	-0.188
2018-01-27 08:02:48		-1.51	-0.688	-0.05	-0.313	-0.05	-0.188
2018-01-27 08:02:48		-1.35	-0.625	-0.05	-0.25	-0.04	-0.125
2018-01-27 16:02:44		-1.21	-0.438	-0.05	-0.25	-0.05	-0.188
2018-01-27 16:02:44		-1.1	-0.313	-0.05	-0.25	-0.04	-0.188
2018-01-27 16:02:48		-1	-0.188	-0.05	-0.25	-0.05	-0.188
2018-01-27 16:02:49		-0.81	-0.125	-0.04	-0.313	-0.05	-0.125
2018-01-27 16:02:52		-0.65	-0.063	-0.03	-0.313	-0.04	-0.125
2018-01-27 16:02:53		-0.61	-0.063	-0.04	-0.313	-0.04	-0.188
2018-01-27 16:02:56		-0.58	-0.063	-0.05	-0.25	-0.03	-0.188
2018-01-27 16:02:57		-0.56	-0.063	-0.05	-0.25	-0.04	-0.188
2018-01-27 22:02:48		-0.55	-0.063	-0.04	-0.313	-0.05	-0.125
2018-01-27 22:02:48		-0.54	0	-0.03	-0.313	-0.02	-0.188
2018-01-27 22:02:52		-0.6	-0.188	-0.03	-0.25	-0.04	-0.188
2018-01-27 22:02:52		-0.76	-0.313	-0.03	-0.25	-0.03	-0.25
2018-01-27 22:02:56		-0.93	-0.375	-0.04	-0.25	-0.05	-0.125
2018-01-27 22:02:56		-1.1	-0.5	-0.05	-0.25	-0.05	-0.125
2018-01-27 23:02:45		-1.27	-0.75	-0.03	-0.25	-0.04	-0.188
2018-01-28 00:02:49		-1.5	-0.813	-0.03	-0.25	-0.04	-0.188
2018-01-28 04:02:49		-1.6	-0.438	-0.04	-0.25	-0.03	-0.188
2018-01-28 04:02:49		-1.6	-0.313	-0.04	-0.25	-0.04	-0.188
2018-01-28 04:02:53		-1.56	-0.25	-0.05	-0.25	-0.03	-0.188
2018-01-28 04:02:53		-1.56	-0.438	-0.03	-0.25	-0.04	-0.188
2018-01-28 07:02:49		-1.71	-1.188	-0.04	-0.188	-0.05	-0.188
2018-01-28 07:02:49		-1.89	-1.313	-0.04	-0.25	-0.04	-0.188
2018-01-28 07:02:53		-2.02	-1.5	-0.04	-0.188	-0.04	-0.188
2018-01-28 08:02:53		-2.17	-1.563	-0.04	-0.188	-0.04	-0.25
2018-01-28 11:02:43		-2.2	-1.063	-0.03	-0.25	-0.04	-0.188
2018-01-28 11:02:43		-2.05	-0.75	-0.04	-0.25	-0.04	-0.188
2018-01-28 11:02:47		-1.74	-0.313	-0.03	-0.25	-0.04	-0.188
2018-01-28 21:02:46		-1.34	0.063	-0.04	-0.188	-0.03	-0.188
2018-01-28 21:02:46		-0.73	0.313	-0.04	-0.188	-0.03	-0.188
2018-01-28 21:02:50		0.19	0.688	-0.03	-0.188	-0.03	-0.188
2018-01-28 21:02:50		1.22	1	-0.03	-0.25	-0.03	-0.188
2018-01-28 21:02:54		2.07	1.125	-0.03	-0.25	-0.03	-0.188
2018-01-28 21:02:54		2.52	0.75	-0.05	-0.188	-0.02	-0.25
2018-01-28 21:02:58		2.42	-0.063	-0.04	-0.25	-0.03	-0.25
2018-01-28 21:02:58		1.87	-0.125	-0.05	-0.188	-0.04	-0.188
2018-01-28 21:03:02		1.27	-0.063	-0.06	-0.25	-0.05	-0.125
2018-01-28 21:03:02		0.62	-0.125	-0.05	-0.25	-0.03	-0.25
2018-01-28 23:02:48		0.13	-0.063	-0.04	-0.25	-0.03	-0.25
2018-01-28 23:02:48		-0.06	0.375	-0.05	-0.25	-0.04	-0.188
2018-01-29 02:02:36		0	0.813	-0.05	-0.188	-0.04	-0.188
2018-01-29 02:02:36		0.07	0.813	-0.04	-0.25	-0.06	-0.188
2018-01-29 02:02:40		0.01	0.813	-0.05	-0.25	-0.05	-0.188
2018-01-29 03:02:42		-0.05	0.625	-0.05	-0.25	-0.05	-0.188
2018-01-29 05:02:47		-0.11	0.688	-0.06	-0.25	-0.06	-0.188
2018-01-29 05:02:47		-0.09	0.688	-0.06	-0.25	-0.05	-0.125
2018-01-29 06:02:44		-0.08	0.75	-0.06	-0.25	-0.04	-0.188
2018-01-29 07:02:43		0.05	1	-0.06	-0.25	-0.04	-0.188
2018-01-29 08:02:51		0.22	1.063	-0.05	-0.25	-0.04	-0.188
2018-02-01 11:03:23		0.33	0.625	-0.05	-0.25	-0.04	-0.188
2018-02-01 11:03:23		0.49	0.688	-0.04	-0.25	-0.04	-0.188
2018-02-01 11:03:27		0.66	0.5	-0.04	-0.25	-0.04	-0.188
2018-02-01 11:03:28		0.9	0.438	-0.05	-0.25	-0.04	-0.188
2018-02-01 11:03:38		1.11	0.438	-0.05	-0.25	-0.03	-0.25
2018-02-01 11:03:39		1.61	0.813	-0.05	-0.25	-0.06	-0.125
2018-02-01 11:03:53		1.79	1	-0.06	-0.188	-0.05	-0.188
2018-02-01 11:03:53		1.6	1.125	-0.05	-0.25	-0.04	-0.188
2018-02-01 11:04:11		1.42	1.188	-0.05	-0.188	-0.05	-0.188
2018-02-01 11:04:11		1.55	1.438	-0.05	-0.188	-0.06	-0.125
2018-02-01 11:04:30		2.16	1	-0.04	-0.25	-0.04	-0.25
2018-02-01 11:04:30		2.9	0.75	-0.03	-0.188	-0.04	-0.25
2018-02-01 11:04:44		3.52	0.813	-0.03	-0.188	-0.05	-0.125
2018-02-01 11:04:44		3.86	0.875	-0.02	-0.25	-0.05	-0.188
2018-02-01 11:04:50		3.86	0.563	-0.03	-0.25	-0.05	-0.188
2018-02-01 11:04:50		3.6	0.5	-0.04	-0.188	-0.06	-0.188
2018-02-01 11:04:56		3.42	0.813	-0.03	-0.188	-0.04	-0.188
2018-02-01 11:04:56		3.5	1	-0.02	-0.188	-0.04	-0.188
2018-02-01 11:05:02		3.57	1.125	-0.01	-0.188	-0.03	-0.25
2018-02-01 11:05:02		3.63	1.25	-0.01	-0.188	-0.02	-0.25
2018-02-01 11:05:07		3.65	1.375	0	-0.188	-0.03	-0.25
2018-02-01 11:05:08		3.66	1.313	-0.01	-0.188	-0.05	-0.188
2018-02-01 11:05:14		3.52	1.25	0	-0.188	-0.04	-0.188
2018-02-01 11:05:14		3.41	1.188	-0.01	-0.188	-0.05	-0.188
2018-02-01 11:05:19		3.29	1	-0.02	-0.125	-0.05	-0.188
2018-02-01 11:05:19		3.07	0.625	-0.02	-0.125	-0.05	-0.188
2018-02-01 12:05:04		3.01	0.563	-0.02	-0.125	-0.05	-0.188
2018-02-01 12:05:04		3.38	0.563	-0.01	-0.125	-0.05	-0.188
2018-02-01 12:05:10		3.77	2.625	-0.01	-0.125	-0.05	-0.188
2018-02-01 12:05:10		2.6	3.688	-0.02	-0.125	-0.03	-0.25
2018-02-01 12:05:15		1.33	4.188	-0.01	-0.125	-0.05	-0.188
2018-02-01 12:05:15		0.59	4	-0.02	-0.125	-0.05	-0.188
2018-02-01 12:05:21		0.18	3.813	-0.01	-0.188	-0.05	-0.188
2018-02-01 12:05:22		-0.04	2.875	-0.03	-0.063	-0.04	-0.188
2018-02-01 12:05:26		-0.2	2	-0.02	-0.063	-0.05	-0.125
2018-02-01 12:05:26		-0.29	1.125	-0.02	-0.063	-0.07	-0.125
2018-02-01 12:05:32		-0.24	0.5	-0.01	-0.063	-0.04	-0.188
2018-02-01 12:05:32		-0.29	0.125	-0.03	0.063	-0.06	-0.125
2018-02-01 12:05:39		-0.39	0	-0.02	0.063	-0.05	-0.188
2018-02-01 12:05:39		-0.47	-0.125	0	0	-0.05	-0.188
2018-02-01 12:05:46		-0.71	-0.375	-0.02	0.125	-0.05	-0.188
2018-02-01 12:05:46		-1.21	-0.563	-0.02	0.125	-0.04	-0.188
2018-02-01 12:05:51		-1.73	-0.625	-0.02	0.125	-0.06	-0.125
2018-02-01 12:05:51		-2.09	-0.813	-0.02	0.125	-0.06	-0.125
2018-02-01 12:05:56		-2.37	-1	-0.02	0.188	-0.06	-0.125
2018-02-01 12:05:56		-2.61	-1.125	-0.02	0.188	-0.04	-0.125
2018-02-01 12:06:04		-2.84	-1.25	-0.03	0.188	-0.06	-0.125
2018-02-01 12:06:04		-3.04	-1.25	-0.03	0.188	-0.05	-0.125
2018-02-01 12:06:12		-2.89	-0.75	-0.02	0.188	-0.04	-0.125
2018-02-01 12:06:13		-2.5	-0.313	-0.01	0.188	-0.03	-0.125
2018-02-01 12:06:18		-2.25	-0.25	-0.01	0.188	-0.03	-0.188
2018-02-01 12:06:18		-2.61	-0.5	-0.01	0.188	-0.04	-0.125
2018-02-01 12:06:24		-3.13	-2.688	-0.01	0.188	-0.03	-0.125
2018-02-01 12:06:24		-2.43	-4.188	0	0.188	-0.04	-0.125
2018-02-01 12:06:31		-1.12	-4.125	0	0.125	-0.04	-0.063
2018-02-01 12:06:31		-0.52	-3.188	-0.01	0.188	-0.03	-0.125
2018-02-01 12:06:38		-0.4	-2.625	-0.01	0.188	-0.02	-0.125
2018-02-01 12:06:38		-0.31	-1.813	0	0.125	-0.03	-0.125
2018-02-01 12:06:48		-0.23	-1.188	-0.01	0.125	-0.02	-0.125
2018-02-01 12:06:48		-0.18	-0.813	-0.01	0.125	-0.01	-0.125
2018-02-01 12:07:02		-0.25	-0.563	-0.02	0.125	-0.03	-0.125
2018-02-01 12:07:03		-0.31	-0.313	-0.01	0.063	-0.01	-0.125
2018-02-01 12:07:09		-0.29	-0.125	-0.01	0.063	-0.02	-0.063
2018-02-01 12:07:09		-0.25	0.125	-0.02	0	-0.01	-0.063
2018-02-01 12:07:17		-0.01	0.25	-0.01	-0.063	-0.01	-0.063
2018-02-01 12:07:17		0.27	0.25	-0.01	0	-0.03	-0.063
2018-02-01 12:07:22		0.44	0.25	-0.01	0	-0.01	-0.063
2018-02-01 12:07:22		0.51	0.25	-0.01	-0.063	-0.02	-0.125
2018-02-01 12:07:28		0.65	0.438	-0.01	-0.063	-0.01	-0.063
2018-02-01 12:07:28		0.98	0.875	-0.01	-0.125	0	-0.125
2018-02-01 12:07:35		1.28	0.938	0.01	-0.125	0	-0.125
2018-02-01 12:07:35		1.49	0.938	0.01	-0.125	-0.01	-0.063
2018-02-01 12:07:42		1.33	0.5	-0.01	-0.125	0	-0.125
2018-02-01 12:07:42		1.07	0.188	-0.01	-0.125	-0.01	-0.125
2018-02-01 12:07:48		0.84	0.063	-0.01	-0.125	-0.01	-0.063
2018-02-01 12:07:48		0.75	0.125	-0.01	-0.125	0	-0.125
2018-02-01 13:03:09		1.03	0.375	-0.02	-0.125	-0.02	-0.063
2018-02-01 14:05:09		1.15	1.125	-0.01	-0.125	-0.01	-0.063
2018-02-01 15:02:46		0.37	1.313	-0.01	-0.125	-0.01	-0.125
2018-02-01 16:02:43		-0.17	0.688	0.01	-0.125	-0.02	-0.063
2018-02-01 17:02:45		-0.25	0.188	0	-0.125	-0.02	-0.063
2018-02-01 18:02:45		-0.29	-0.313	0	-0.125	-0.03	-0.063
2018-02-01 19:02:45		-0.31	-0.813	0	-0.125	-0.03	-0.063
2018-02-01 20:02:50		-0.61	-0.625	-0.01	-0.125	-0.02	-0.063
2018-02-01 21:02:45		-1	-0.188	-0.02	-0.125	-0.02	-0.063
2018-02-01 22:02:45		-1.25	-0.625	-0.01	-0.125	-0.03	-0.063
2018-02-01 23:02:46		-1.78	-1.188	-0.01	-0.125	-0.02	-0.063
2018-02-02 00:02:45		-2.23	-1.438	-0.01	-0.063	-0.03	-0.063
2018-02-02 01:02:45		-2.51	-1.813	-0.01	-0.063	-0.02	-0.125
2018-02-02 02:02:49		-2.57	-1.875	-0.02	-0.063	-0.02	-0.063
2018-02-02 03:02:43		-2.49	-2.25	-0.02	-0.063	-0.02	-0.125
2018-02-02 04:02:46		-2.47	-2.375	-0.01	0	-0.01	-0.063
2018-02-02 05:02:47		-2.57	-2.625	-0.02	-0.063	-0.01	-0.125
2018-02-02 06:02:44		-2.84	-3.25	-0.01	0	-0.03	-0.063
2018-02-02 07:02:43		-3.07	-3.5	-0.01	-0.063	-0.02	-0.063
2018-02-02 08:02:49		-3.23	-2.938	-0.03	0	-0.01	-0.063
2018-02-02 09:02:43		-3.05	-1.75	-0.01	0	-0.01	-0.063
2018-02-02 10:03:02		-2.77	-1	-0.02	-0.063	-0.01	-0.063
2018-02-02 11:02:44		-2.54	-0.563	-0.01	-0.063	-0.01	0
2018-02-02 13:02:29		-2.33	-0.25	-0.01	-0.063	-0.02	-0.063
2018-02-02 13:02:29		-2.27	-0.188	-0.01	-0.063	-0.01	-0.063
2018-02-02 14:02:50		-1.94	-0.438	-0.02	-0.063	-0.01	-0.063
2018-02-02 15:02:47		-1.21	-1	-0.02	0	0	-0.063
2018-02-02 16:02:44		-0.6	-1.188	-0.02	-0.063	0	-0.063
2018-02-02 17:02:44		-0.28	-1.25	-0.02	-0.063	-0.01	-0.063
2018-02-02 18:02:45		-0.17	-1.375	-0.02	-0.063	0	-0.063
2018-02-02 19:02:46		-0.38	-0.938	-0.03	-0.063	-0.01	-0.063
2018-02-02 20:02:50		-0.9	-0.375	-0.02	-0.063	-0.01	-0.063
2018-02-02 21:02:44		-1.46	-0.5	-0.01	-0.125	-0.01	-0.063
2018-02-02 22:02:44		-1.87	-0.063	-0.03	-0.125	0	-0.063
2018-02-02 23:02:45		-1.68	0.313	-0.04	-0.125	0	-0.125
2018-02-03 00:02:45		-1.3	0.313	-0.05	-0.125	-0.01	-0.063
2018-02-03 01:02:45		-1.08	0.5	-0.06	-0.125	0	-0.063
2018-02-03 02:02:49		-0.96	0.563	-0.05	-0.188	-0.01	-0.063
2018-02-03 03:02:42		-0.82	0.875	-0.06	-0.25	0	-0.063
2018-02-03 04:02:45		-0.65	0.938	-0.08	-0.25	-0.01	-0.063
2018-02-03 05:02:45		-0.5	1	-0.08	-0.188	-0.01	-0.063
2018-02-03 06:02:45		-0.39	1.125	-0.08	-0.25	-0.01	-0.063
2018-02-03 07:02:46		-0.29	1.188	-0.1	-0.188	-0.02	-0.063
2018-02-03 08:02:51		-0.2	0.625	-0.08	-0.25	-0.01	-0.125
2018-02-03 09:02:44		-0.19	0	-0.08	-0.25	-0.03	-0.063
2018-02-03 10:02:44		-0.22	-0.063	-0.07	-0.188	-0.02	-0.063
2018-02-03 11:02:45		-0.28	-0.063	-0.07	-0.188	-0.02	-0.125
2018-02-03 12:02:44		-0.35	-0.063	-0.07	-0.188	-0.01	-0.063
2018-02-03 13:02:43		-0.44	-0.125	-0.06	-0.188	-0.02	-0.063
2018-02-03 14:02:50		-0.53	-0.25	-0.05	-0.25	-0.03	-0.063
2018-02-03 15:03:04		-0.48	-0.313	-0.06	-0.25	-0.03	-0.063
2018-02-03 16:02:44		-0.35	-0.25	-0.07	-0.188	-0.03	-0.063
2018-02-03 17:04:35		-0.28	-0.063	-0.05	-0.188	-0.03	-0.063
2018-02-03 18:03:04		-0.53	-1.063	-0.06	-0.188	-0.04	-0.125
2018-02-03 19:02:44		-1.06	0	-0.05	-0.188	-0.02	-0.125
2018-02-03 20:02:48		-1.23	-0.125	-0.05	-0.25	-0.02	-0.063
2018-02-03 21:02:41		-1.14	-0.125	-0.06	-0.188	-0.03	-0.063
2018-02-03 22:02:44		-0.89	-0.125	-0.05	-0.188	-0.02	-0.125
2018-02-03 23:02:44		-0.58	0.25	-0.04	-0.188	-0.03	-0.063
2018-02-04 00:02:44		-0.28	0.375	-0.03	-0.188	-0.02	-0.125
2018-02-04 01:02:44		-0.09	0.375	-0.02	-0.188	-0.04	-0.063
2018-02-04 02:02:49		0.08	0.5	-0.02	-0.188	-0.03	-0.125
2018-02-04 03:02:45		0.2	0.5	-0.01	-0.125	-0.04	-0.063
2018-02-04 04:02:45		0.23	0.5	0	-0.125	-0.04	-0.063
2018-02-04 05:02:46		0.23	0.5	0	-0.188	-0.03	-0.063
2018-02-04 06:02:46		0.29	0.625	0	-0.125	-0.02	-0.063
2018-02-04 07:02:45		0.39	0.875	0.01	-0.188	-0.02	-0.125
2018-02-04 08:02:50		0.73	1.375	0.01	-0.188	-0.02	-0.125
2018-02-04 09:02:50		1.1	1.563	0	-0.188	-0.02	-0.125
2018-02-04 10:02:44		1.41	1.188	-0.01	-0.188	-0.03	-0.125
2018-02-04 11:02:52		1.85	1	-0.02	-0.125	-0.03	-0.125
2018-02-04 12:02:46		2.47	1.188	-0.02	-0.188	-0.03	-0.125
2018-02-04 13:02:53		2.86	1.75	-0.02	-0.188	-0.03	-0.125
2018-02-04 14:03:04		2.33	1.875	-0.03	-0.125	-0.03	-0.125
2018-02-04 15:03:17		1.39	1.438	-0.03	-0.125	-0.03	-0.125
2018-02-04 16:03:15		0.72	0.813	-0.02	-0.125	-0.04	-0.125
2018-02-04 17:02:45		0.31	0	-0.03	-0.125	-0.04	-0.125
2018-02-04 19:02:44		0.48	1.063	-0.02	-0.125	-0.03	-0.063
2018-02-04 20:02:50		1.07	0.313	-0.02	-0.188	-0.03	-0.063
2018-02-04 21:02:44		1.6	0.438	-0.01	-0.125	-0.02	-0.188
2018-02-04 22:02:44		2.05	0.688	-0.01	-0.063	-0.01	-0.188
2018-02-04 23:02:45		2.06	0.563	-0.01	-0.125	-0.03	-0.125
2018-02-05 00:02:45		1.72	0.313	-0.01	-0.125	-0.03	-0.125
2018-02-05 01:02:44		1.36	0.188	-0.01	-0.125	-0.02	-0.125
2018-02-05 02:02:48		1.1	0.188	-0.01	-0.125	-0.03	-0.125
2018-02-05 03:02:46		0.84	-0.063	-0.01	-0.125	-0.02	-0.125
2018-02-05 04:02:43		0.59	0	-0.02	-0.125	-0.02	-0.125
2018-02-05 05:02:46		0.57	0.25	-0.01	-0.125	-0.02	-0.125
2018-02-05 06:02:46		0.59	0.313	-0.01	-0.125	-0.03	-0.125
2018-02-05 07:02:46		0.51	0.25	-0.01	-0.125	-0.03	-0.125
2018-02-05 08:02:50		0.41	0.188	-0.02	-0.063	-0.03	-0.063
2018-02-05 09:02:41		0.33	0.125	-0.02	-0.063	-0.04	-0.063
2018-02-05 10:02:45		0.2	-0.125	-0.01	-0.063	-0.04	-0.125
2018-02-05 11:02:47		-0.05	-0.188	-0.01	-0.063	-0.04	-0.063
2018-02-05 12:02:59		-0.42	-0.375	-0.01	-0.125	-0.04	-0.063
2018-02-05 13:02:45		-0.93	-0.75	-0.01	-0.063	-0.03	-0.125
2018-02-05 14:02:52		-1.09	-1.125	-0.01	-0.063	-0.04	-0.125
2018-02-05 15:02:53		-0.68	-1.25	-0.01	-0.063	-0.03	-0.125
2018-02-05 16:02:44		-0.44	-1.063	0	-0.063	-0.03	-0.125
2018-02-05 17:02:44		-0.29	-0.813	-0.02	-0.063	-0.03	-0.125
2018-02-05 18:02:42		-0.17	-0.313	-0.01	-0.063	-0.02	-0.125
2018-02-05 19:02:47		-0.16	-0.125	-0.02	-0.063	-0.02	-0.125
2018-02-05 20:02:49		-0.11	0	-0.01	0	-0.03	-0.125
2018-02-05 21:02:44		-0.03	0.063	-0.02	-0.063	-0.04	-0.063
2018-02-05 22:02:43		-0.03	-0.125	-0.01	-0.125	-0.05	-0.063
2018-02-05 23:02:46		0.15	0.188	-0.02	0	-0.02	-0.125
2018-02-06 00:02:46		0.46	0.313	-0.02	0	-0.04	-0.063
2018-02-06 01:02:46		0.69	0.438	-0.02	-0.063	-0.02	-0.125
2018-02-06 02:02:50		0.98	0.625	-0.02	-0.063	-0.02	-0.125
2018-02-06 03:02:44		1.31	0.938	-0.02	0	-0.02	-0.125
2018-02-06 04:02:45		1.62	1	-0.01	0	-0.03	-0.125
2018-02-06 05:02:44		1.66	0.875	-0.01	-0.063	-0.03	-0.125
2018-02-06 06:02:44		1.62	0.813	-0.01	-0.063	-0.03	-0.125
2018-02-06 07:02:44		1.52	0.75	0	-0.063	-0.02	-0.125
2018-02-06 08:02:50		1.35	0.813	0	-0.063	-0.03	-0.125
2018-02-06 09:02:41		1.33	0.813	-0.01	0	-0.03	-0.125
2018-02-06 10:02:46		1.46	0.75	-0.01	0	-0.02	-0.063
2018-02-06 11:03:00		1.8	0.625	-0.02	0	-0.02	-0.125
2018-02-06 12:02:47		2.36	0.75	0	-0.063	-0.02	-0.125
2018-02-06 13:02:50		2.89	1.5	-0.01	0	-0.03	-0.063
2018-02-06 14:02:49		2.28	2.375	-0.01	0	-0.02	-0.063
2018-02-06 15:04:03		1.13	2.875	-0.02	0	-0.02	-0.063
2018-02-06 16:03:19		0.47	2.938	-0.01	-0.063	-0.02	-0.063
2018-02-06 17:02:43		0.11	2.625	-0.01	0	-0.02	-0.063
2018-02-06 18:02:44		-0.06	2.25	-0.02	0	-0.03	-0.063
2018-02-06 19:02:44		-0.11	1.813	-0.01	0	-0.03	-0.063
2018-02-06 20:02:46		-0.01	1.125	-0.02	0	-0.02	-0.063
2018-02-06 21:02:43		0.28	0.25	-0.01	0.063	-0.03	-0.125
2018-02-06 22:02:44		0.48	0.125	-0.01	0.125	-0.01	-0.125
2018-02-06 23:02:44		0.59	-0.063	0.01	0.063	-0.03	-0.063
2018-02-07 00:02:43		0.52	-0.375	0.01	0.063	-0.02	-0.125
2018-02-07 01:02:46		0.15	-0.75	0.01	0.125	-0.05	-0.063
2018-02-07 02:02:50		-0.43	-1.188	0.01	0.125	-0.04	-0.063
2018-02-07 03:02:43		-0.91	-1.563	0.01	0.063	-0.04	-0.063
2018-02-07 04:02:43		-1.24	-1.563	0.01	0.125	-0.03	-0.063
2018-02-07 05:02:44		-1.41	-1.813	0	0.188	-0.03	-0.063
2018-02-07 06:02:43		-1.51	-1.875	0	0.188	-0.03	-0.063
2018-02-07 07:02:45		-1.51	-1.688	0	0.188	-0.04	-0.063
2018-02-07 08:02:50		-1.37	-1.063	0.01	0.188	-0.03	-0.063
2018-02-07 09:02:46		-1.26	-0.75	0.02	0.125	-0.02	-0.063
2018-02-07 10:04:06		-1.27	-0.5	0.02	0.125	-0.01	-0.063
2018-02-07 11:02:45		-1.44	-0.438	0.03	0.125	-0.01	-0.063
2018-02-07 12:02:45		-1.77	-0.5	0.01	0.188	-0.01	-0.063
2018-02-07 13:02:45		-1.93	-1.063	0	0.125	-0.03	-0.063
2018-02-07 14:03:32		-1.24	-1.688	0.01	0.125	-0.01	-0.063
2018-02-07 15:03:42		-0.63	-2.125	0.01	0.125	-0.03	-0.063
2018-02-07 16:02:28		-0.34	-1.875	0.01	0.188	-0.01	-0.063
2018-02-07 17:02:43		-0.25	-1.375	0.02	0.063	-0.02	-0.063
2018-02-07 18:02:41		-0.19	-0.875	0.01	0.125	-0.01	-0.063
2018-02-07 19:02:44		-0.15	-0.188	0.02	0.063	-0.02	-0.063
2018-02-07 20:03:52		-0.06	0.563	0.01	0.125	-0.02	-0.063
2018-02-07 21:02:44		0.08	1.25	0	0.125	-0.01	0
2018-02-07 22:02:44		0.54	1.375	0	0.063	-0.02	0
2018-02-07 23:02:46		1.08	1.375	-0.01	0.063	-0.02	0
2018-02-08 01:02:26		1.66	1.5	-0.01	0.063	-0.01	0
2018-02-08 01:02:26		2.45	1.875	0	0.063	0	0
2018-02-08 02:02:46		3.3	2.25	-0.01	0.063	0	0
2018-02-08 03:02:43		3.99	2.625	0	0.063	0	0
2018-02-08 04:02:43		4.5	2.688	0	0	-0.02	0
2018-02-08 05:02:43		4.92	3	0	0	0	0
2018-02-08 06:02:44		5.27	2.875	0	0.063	-0.01	0
2018-02-08 07:02:43		5.59	2.438	-0.01	0.063	-0.01	0
2018-02-08 08:02:51		5.59	2	0	0	0	0
2018-02-08 09:02:43		5.45	1.563	-0.01	0.063	-0.01	0
2018-02-08 10:02:44		5.27	1.25	-0.02	0.063	-0.03	0
2018-02-08 11:04:05		4.7	2.5	-0.01	0.063	-0.02	0
2018-02-08 12:03:57		3.81	3.875	-0.01	0.063	-0.03	0
2018-02-08 13:04:04		2.47	4.688	0.01	0.063	-0.01	0
2018-02-08 14:02:52		0.99	4.563	-0.01	0.063	-0.03	0
2018-02-08 15:02:50		0.18	4.063	0	0.063	0	-0.063
2018-02-08 16:02:44		-0.14	3.438	0	0.063	-0.03	0
2018-02-08 17:02:43		-0.18	3.188	-0.02	0.188	-0.01	0
2018-02-08 18:02:44		-0.17	3.125	0	0.125	-0.01	0
2018-02-08 19:02:44		-0.15	3.188	0	0.188	-0.01	0
2018-02-08 20:02:49		-0.16	3.063	0.02	0.125	-0.01	0
2018-02-08 21:02:45		-0.19	2.813	0.02	0.188	-0.01	0
2018-02-08 22:02:44		-0.22	2.5	0.02	0.25	0	-0.063
2018-02-08 23:02:44		-0.23	2.313	0.03	0.25	-0.01	0
2018-02-09 00:02:44		-0.22	2.313	0.03	0.313	-0.01	0
2018-02-09 01:02:44		-0.23	2.25	0.02	0.375	0	0
2018-02-09 02:02:48		-0.23	2.125	0.03	0.438	-0.01	0
2018-02-09 03:02:45		-0.28	1.813	0.04	0.438	-0.01	0
2018-02-09 04:02:44		-0.31	1.5	0.04	0.5	0	0
2018-02-09 05:02:44		-0.31	1.313	0.04	0.5	0	0
2018-02-09 06:02:44		-0.27	1.563	0.05	0.438	0.01	0
2018-02-09 07:02:45		-0.24	1.875	0.06	0.438	0	0
2018-02-09 08:02:49		-0.01	1.563	0.05	0.563	0	0
2018-02-09 09:02:46		-0.03	1.25	0.07	0.5	0	0
2018-02-09 10:02:49		-0.33	1.125	0.07	0.5	0	0
2018-02-09 11:02:46		-0.46	0.063	0.06	0.563	-0.01	0
2018-02-09 12:02:45		-0.48	-0.25	0.06	0.563	0.01	0
2018-02-09 13:02:46		-0.44	0.063	0.06	0.563	0.03	0
2018-02-09 14:02:48		-0.36	0.563	0.07	0.563	0.01	0
2018-02-09 15:02:47		-0.27	1.25	0.07	0.563	0.02	0.063
2018-02-09 16:02:47		-0.29	1.375	0.06	0.625	0.01	0.063
2018-02-09 17:02:43		-0.35	0.875	0.08	0.563	0.01	0.063
2018-02-09 18:02:41		-0.43	0.25	0.08	0.563	0.01	0
2018-02-09 19:02:43		-0.5	-0.688	0.06	0.625	0.02	0.063
2018-02-09 20:02:45		-0.58	-1.375	0.05	0.625	0.02	0.063
2018-02-09 21:02:46		-0.61	-1.813	0.06	0.625	0.02	0.063
2018-02-09 22:02:42		-0.66	-2.313	0.05	0.625	0	0.125
2018-02-09 23:02:45		-0.71	-2.75	0.05	0.625	0.02	0.063
2018-02-10 00:02:47		-0.92	-2.688	0.06	0.563	0.02	0.063
2018-02-10 01:02:43		-1.19	-2.875	0.06	0.563	0.01	0.063
2018-02-10 02:02:51		-1.5	-3.188	0.05	0.563	0.02	0.063
2018-02-10 03:02:43		-1.8	-2.688	0.04	0.5	0.03	0.063
2018-02-10 04:02:46		-2.2	-2.563	0.03	0.5	0.02	0.125
2018-02-10 05:02:46		-2.7	-2.438	0.04	0.5	0.02	0.125
2018-02-10 06:02:52		-3.28	-2.563	0.04	0.5	0.01	0.125
2018-02-10 07:02:46		-3.75	-2.5	0.02	0.5	0.03	0.125
2018-02-10 08:02:51		-4.03	-2.313	0.01	0.438	0.02	0.125
2018-02-10 09:02:44		-3.85	-1.813	0.01	0.438	0.03	0.125
2018-02-10 10:02:46		-3.14	-1.625	0.01	0.438	0.04	0.125
2018-02-10 11:02:44		-2.02	-1.813	0.02	0.313	0.04	0.125
2018-02-10 12:02:44		-0.73	-2.313	0.01	0.313	0.04	0.188
2018-02-10 13:02:44		-0.3	-2.125	0.01	0.313	0.02	0.125
2018-02-10 14:02:49		-0.27	-1.75	0	0.313	0.04	0.188
2018-02-10 15:02:46		-0.26	-1.563	-0.01	0.313	0.02	0.188
2018-02-10 16:02:44		-0.24	-1.375	0.01	0.188	0.04	0.125
2018-02-10 17:02:44		-0.23	-1.188	0	0.188	0.04	0.125
2018-02-10 18:02:44		-0.23	-1.313	-0.02	0.188	0.02	0.188
2018-02-10 19:03:03		-0.27	-1.25	-0.01	0.125	0.02	0.125
2018-02-10 20:02:48		-0.27	-1.25	-0.01	0.125	0.02	0.188
2018-02-10 21:02:41		-0.29	-1.5	-0.02	0.063	0.03	0.188
2018-02-10 22:02:45		-0.41	-1.125	-0.01	0	0.03	0.188
2018-02-10 23:02:44		-0.72	-0.625	-0.03	0.063	0.03	0.125
2018-02-11 00:02:44		-0.96	-0.813	-0.03	0.063	0.03	0.188
2018-02-11 01:02:46		-1.31	-0.625	-0.04	0	0.03	0.188
2018-02-11 02:02:49		-1.73	-0.25	-0.02	-0.063	0.03	0.188
2018-02-11 03:02:45		-2.04	-0.75	-0.03	0	0.02	0.188
2018-02-11 04:02:45		-2.06	-0.75	-0.03	-0.063	0.04	0.125
2018-02-11 05:02:45		-2.24	-0.938	-0.04	-0.063	0.03	0.125
2018-02-11 06:02:45		-1.99	-0.938	-0.05	-0.063	0.05	0.125
2018-02-11 07:02:45		-1.73	-0.563	-0.04	-0.063	0.04	0.125
2018-02-11 08:02:50		-1.15	0.063	-0.03	-0.125	0.05	0.125
2018-02-11 09:02:41		-0.58	0.313	-0.03	-0.063	0.04	0.125
2018-02-11 11:04:07		-0.17	0.313	-0.04	-0.125	0.03	0.125
2018-02-11 11:04:07		0.19	0.625	-0.05	-0.063	0.03	0.125
2018-02-11 12:02:55		0.11	1.125	-0.05	-0.063	0.02	0.063
2018-02-11 13:02:46		-0.02	1.25	-0.06	-0.063	0.01	0.188
2018-02-11 14:02:53		-0.07	1	-0.05	-0.063	0.02	0.125
2018-02-11 15:02:45		-0.12	0.5	-0.03	-0.125	0.01	0.125
2018-02-11 16:03:09		-0.17	-0.125	-0.06	-0.063	0.01	0.125
2018-02-11 17:02:46		-0.22	-0.75	-0.05	-0.125	0.01	0.125
2018-02-11 18:02:43		-0.29	-1.25	-0.04	-0.125	0.01	0.125
2018-02-11 19:03:05		-0.26	-1.063	-0.04	-0.125	0.02	0.125
2018-02-11 20:02:48		-0.24	-0.813	-0.03	-0.125	0.02	0.063
2018-02-11 21:02:44		-0.2	-0.5	-0.05	-0.063	0.01	0.063
2018-02-11 22:02:44		-0.34	-0.25	-0.04	-0.063	0.02	0.063
2018-02-11 23:02:45		-0.24	0.188	-0.02	-0.125	0.01	0.125
2018-02-12 00:02:44		0.1	0.438	-0.03	-0.125	0.01	0.063
2018-02-12 01:02:44		0.57	0.5	-0.02	-0.125	0.02	0.063
2018-02-12 02:02:48		1.19	0.625	-0.04	-0.063	0.01	0.063
2018-02-12 03:02:45		1.62	0.813	-0.03	-0.063	0.02	0.063
2018-02-12 04:02:45		1.83	1	-0.02	-0.063	0.01	0.063
2018-02-12 06:02:44		2.37	1.313	-0.01	-0.125	0	0.063
2018-02-12 07:02:46		2.57	1.5	-0.01	-0.063	0	0.125
2018-02-12 08:02:49		2.66	1.313	-0.02	-0.063	0	0.063
2018-02-12 09:02:42		2.76	1	0	-0.063	0	0.063
2018-02-12 10:02:46		2.93	0.688	-0.01	-0.125	0	0.063
2018-02-12 11:02:43		2.88	1.875	-0.01	-0.063	0	0.063
2018-02-12 12:02:45		1.6	3.375	-0.02	-0.063	0	0.063
2018-02-12 13:02:51		0.4	3.875	-0.02	-0.063	0	0.063
2018-02-12 14:02:45		0.07	3.438	-0.02	-0.063	0.02	0
2018-02-12 15:02:44		0.03	3.125	-0.02	-0.063	0	0
2018-02-12 16:02:46		-0.02	2.938	-0.03	-0.063	-0.01	0.063
2018-02-12 17:02:49		-0.02	3	-0.02	-0.063	-0.01	0.063
2018-02-12 18:02:42		0	3.375	-0.01	0	-0.01	0
2018-02-12 19:02:48		0.1	4.438	-0.01	0.063	0.01	0
2018-02-12 20:02:50		0.19	5.125	-0.01	0.063	0	0
2018-02-12 21:02:43		0.23	5.625	-0.02	0.125	-0.01	0.063
2018-02-12 22:02:45		0.25	6.063	0.01	0.063	0	0
2018-02-12 23:02:43		0.53	5.938	0.01	0.125	-0.01	0.063
2018-02-13 00:02:43		0.77	5.25	0	0.188	-0.01	0
2018-02-13 01:02:46		0.81	4.75	0	0.25	-0.01	0
2018-02-13 02:02:51		0.93	4.313	0.01	0.25	-0.03	0.063
2018-02-13 03:02:43		0.98	3.688	0.02	0.25	-0.01	0
2018-02-13 04:02:43		1.14	3.25	0.03	0.313	-0.01	0
2018-02-13 05:02:42		1.34	2.813	0.03	0.313	-0.02	0.063
2018-02-13 06:02:45		1.48	2.5	0.03	0.438	0	0
2018-02-13 07:02:45		1.64	2.5	0.05	0.375	-0.01	-0.063
2018-02-13 08:02:48		1.81	2.563	0.05	0.438	-0.02	0.063
2018-02-13 09:02:43		1.51	2.688	0.03	0.5	-0.03	0.063
2018-02-13 10:02:45		0.78	3.875	0.04	0.5	-0.02	0.063
2018-02-13 11:02:45		-0.19	3.563	0.06	0.5	0	0.063
2018-02-13 12:02:44		-0.34	2.438	0.06	0.563	0	0.063
2018-02-13 13:02:45		-0.3	2.438	0.07	0.563	-0.02	0.063
2018-02-13 14:02:49		-0.32	2.313	0.07	0.563	-0.03	0.063
2018-02-13 15:03:07		-0.39	1.813	0.07	0.563	-0.04	0.063
2018-02-13 16:02:46		-0.52	0.625	0.08	0.625	-0.01	0
2018-02-13 17:02:41		-0.55	0.125	0.08	0.688	-0.02	0.063
2018-02-13 18:02:44		-0.5	0.25	0.07	0.75	-0.01	0.125
2018-02-13 19:02:44		-0.43	0.625	0.08	0.688	-0.02	0.063
2018-02-13 20:02:48		-0.39	1	0.08	0.75	-0.01	0.125
2018-02-13 21:02:44		-0.35	1.188	0.1	0.688	-0.01	0.063
2018-02-13 22:02:44		-0.33	1.188	0.09	0.75	-0.01	0.125
2018-02-13 23:02:45		-0.31	1.375	0.08	0.75	0	0.063
2018-02-14 00:02:44		-0.28	1.563	0.09	0.75	0.01	0.125
2018-02-14 01:02:45		-0.22	1.875	0.1	0.75	0	0.125
2018-02-14 02:02:49		-0.2	2.063	0.09	0.813	0.02	0.063
2018-02-14 03:02:42		-0.16	2.438	0.1	0.75	0.01	0.125
2018-02-14 04:02:45		-0.11	2.75	0.09	0.75	-0.01	0.188
2018-02-14 05:02:45		-0.09	2.938	0.08	0.813	0.01	0.125
2018-02-14 06:02:46		-0.1	3.063	0.08	0.75	-0.01	0.188
2018-02-14 07:02:46		-0.13	2.875	0.08	0.813	0.01	0.188
2018-02-14 08:02:50		-0.18	2.5	0.09	0.813	0.01	0.125
2018-02-14 09:02:42		-0.25	1.938	0.1	0.813	0.01	0.125
2018-02-14 10:04:06		-0.43	0.563	0.09	0.813	0.01	0.125
2018-02-14 11:04:07		-0.52	-0.5	0.08	0.875	-0.01	0.188
2018-02-14 12:04:04		-0.53	-0.625	0.1	0.813	-0.01	0.188
2018-02-14 13:05:28		-0.6	-1.313	0.1	0.813	0.01	0.188
2018-02-14 15:03:06		-0.65	-1.75	0.1	0.875	0.02	0.188
2018-02-14 15:03:06		-0.66	-2.125	0.11	0.875	0.04	0.188
2018-02-14 17:04:51		-0.52	-1.25	0.1	0.875	0.03	0.25
2018-02-14 17:04:51		-0.49	-0.813	0.09	0.875	0.05	0.188
2018-02-14 18:02:45		-0.51	-1	0.1	0.813	0.04	0.188
2018-02-14 19:02:46		-0.55	-1.375	0.09	0.813	0.04	0.25
2018-02-14 20:02:49		-0.54	-1.5	0.09	0.813	0.05	0.188
2018-02-14 21:02:43		-0.52	-1.438	0.08	0.813	0.06	0.188
2018-02-14 22:02:45		-0.5	-1.375	0.09	0.813	0.04	0.25
2018-02-14 23:02:47		-0.5	-1.438	0.09	0.75	0.05	0.25
2018-02-15 00:02:43		-0.49	-1.438	0.08	0.75	0.04	0.25
2018-02-15 01:02:48		-0.49	-1.5	0.07	0.75	0.06	0.25
2018-02-15 02:02:49		-0.52	-1.688	0.08	0.688	0.04	0.25
2018-02-15 03:02:44		-0.56	-2.188	0.08	0.688	0.03	0.313
2018-02-15 04:02:43		-0.59	-2.688	0.07	0.688	0.05	0.25
2018-02-15 05:02:46		-0.6	-2.875	0.08	0.625	0.04	0.25
2018-02-15 06:02:46		-0.6	-3.25	0.08	0.625	0.06	0.25
2018-02-15 07:02:46		-0.62	-3.438	0.07	0.563	0.07	0.25
2018-02-15 08:02:50		-0.59	-3	0.07	0.5	0.07	0.313
2018-02-15 09:02:43		-0.52	-2.438	0.05	0.563	0.07	0.313
2018-02-15 10:02:44		-0.36	-1.438	0.05	0.563	0.07	0.313
2018-02-15 11:02:44		-0.2	-0.125	0.05	0.5	0.07	0.25
2018-02-15 12:02:44		-0.12	0.563	0.04	0.5	0.07	0.313
2018-02-15 13:02:45		-0.08	1.125	0.04	0.438	0.07	0.313
2018-02-15 14:02:47		-0.01	1.563	0.06	0.375	0.07	0.313
2018-02-15 15:02:43		0.06	2.25	0.04	0.375	0.08	0.313
2018-02-15 17:02:44		0.03	2.313	0.04	0.375	0.08	0.313
2018-02-15 17:02:44		-0.03	2	0.04	0.313	0.07	0.25
2018-02-15 18:02:43		-0.1	1.563	0.04	0.313	0.07	0.313
2018-02-15 19:02:46		-0.17	1	0.04	0.375	0.07	0.313
2018-02-15 20:02:49		-0.29	0.125	0.03	0.313	0.06	0.313
2018-02-15 21:02:45		-0.37	-0.625	0.03	0.313	0.06	0.313
2018-02-15 22:02:44		-0.42	-1.125	0.03	0.313	0.07	0.313
2018-02-15 23:02:44		-0.42	-1.75	0.03	0.375	0.06	0.313
2018-02-16 00:02:43		-0.47	-2.125	0.04	0.313	0.06	0.313
2018-02-16 01:02:44		-0.49	-2.5	0.04	0.25	0.05	0.313
2018-02-16 02:02:48		-0.47	-2.5	0.03	0.313	0.07	0.313
2018-02-16 03:02:45		-0.42	-2	0.03	0.313	0.08	0.313
2018-02-16 04:02:44		-0.36	-1.188	0.03	0.25	0.07	0.313
2018-02-16 05:02:45		-0.34	-1.125	0.03	0.313	0.07	0.313
2018-02-16 06:02:44		-0.33	-1.063	0.01	0.313	0.06	0.313
2018-02-16 07:02:44		-0.28	-0.375	0.02	0.313	0.05	0.313
2018-02-16 08:02:46		-0.18	0.063	0.02	0.313	0.06	0.25
2018-02-16 09:02:47		-0.17	0.25	0.03	0.25	0.06	0.25
2018-02-16 10:02:42		-0.23	-0.125	0.02	0.25	0.06	0.313
2018-02-16 11:02:46		-0.26	-0.313	0.03	0.188	0.07	0.313
2018-02-16 12:02:46		-0.23	-0.063	0.03	0.188	0.07	0.25
2018-02-16 13:02:45		-0.28	-0.563	0.01	0.25	0.08	0.25
2018-02-16 14:02:50		-0.33	-0.875	0	0.188	0.06	0.313
2018-02-16 15:02:43		-0.37	-1.375	0.01	0.188	0.05	0.313
2018-02-16 16:02:44		-0.37	-1.5	0.01	0.188	0.05	0.25
2018-02-16 17:02:43		-0.3	-1.125	0.01	0.188	0.06	0.313
2018-02-16 18:02:42		-0.24	-0.5	0	0.188	0.06	0.25
2018-02-16 19:02:45		-0.2	-0.125	0	0.125	0.06	0.25
2018-02-16 20:02:50		-0.14	0.313	0.02	0.125	0.06	0.25
2018-02-16 21:02:42		-0.09	0.875	0.01	0.125	0.06	0.313
2018-02-16 22:02:46		-0.02	1.563	0	0.125	0.05	0.25
2018-02-16 23:02:43		0.01	2.313	0	0.063	0.06	0.25
2018-02-17 00:02:46		0.07	2.938	0	0.125	0.06	0.25
2018-02-17 01:02:45		0.12	3.5	0	0.125	0.06	0.25
2018-02-17 02:02:48		0.14	3.813	0.01	0.125	0.06	0.25
2018-02-17 03:02:44		0.15	3.875	0	0.125	0.06	0.25
2018-02-17 04:02:44		0.12	3.625	0	0.125	0.06	0.25
2018-02-17 05:02:44		0.12	3.813	0	0.125	0.06	0.188
2018-02-17 06:02:44		0.11	4.125	0.01	0.125	0.06	0.25
2018-02-17 07:02:42		0.08	3.625	0	0.188	0.06	0.25
2018-02-17 08:02:46		-0.05	2.75	0	0.188	0.05	0.25
2018-02-17 09:02:43		-0.12	2.125	0	0.188	0.06	0.25
2018-02-17 10:02:44		-0.16	1.813	0.02	0.188	0.03	0.25
2018-02-17 11:02:42		-0.27	0.875	0.01	0.25	0.03	0.25
2018-02-17 12:02:43		-0.43	-0.438	0	0.25	0.03	0.25
2018-02-17 13:02:46		-0.49	-1.063	0.02	0.25	0.03	0.25
2018-02-17 14:02:52		-0.55	-1.813	0.01	0.375	0.04	0.188
2018-02-17 15:02:44		-0.59	-2.25	0.03	0.313	0.04	0.188
2018-02-17 16:02:44		-0.55	-2.125	0.03	0.313	0.05	0.188
2018-02-17 17:02:45		-0.51	-1.938	0.03	0.375	0.04	0.188
2018-02-17 18:02:44		-0.44	-1.625	0.02	0.375	0.02	0.25
2018-02-17 19:02:44		-0.36	-1.125	0.02	0.375	0.05	0.25
2018-02-17 20:02:49		-0.3	-0.625	0.03	0.375	0.03	0.25
2018-02-17 21:02:42		-0.28	-0.5	0.03	0.438	0.03	0.188
2018-02-17 22:02:44		-0.3	-0.625	0.03	0.375	0.06	0.188
2018-02-17 23:02:44		-0.3	-0.688	0.03	0.375	0.05	0.188
2018-02-18 00:02:44		-0.31	-0.813	0.02	0.313	0.05	0.188
2018-02-18 01:02:44		-0.33	-0.875	0.02	0.313	0.05	0.188
2018-02-18 02:02:49		-0.32	-0.938	0.02	0.313	0.04	0.25
2018-02-18 03:02:41		-0.31	-0.875	0.02	0.313	0.05	0.188
2018-02-18 04:02:45		-0.3	-0.813	0.02	0.313	0.04	0.188
2018-02-18 05:02:45		-0.31	-0.938	0.02	0.25	0.04	0.25
2018-02-18 06:02:45		-0.28	-0.875	0.02	0.313	0.05	0.188
2018-02-18 07:02:44		-0.26	-0.688	0.02	0.188	0.04	0.188
2018-02-18 08:02:47		-0.25	-0.563	0.02	0.188	0.05	0.188
2018-02-18 09:02:41		-0.21	-0.375	0.02	0.188	0.04	0.188
2018-02-18 10:02:42		-0.22	-0.375	0	0.25	0.05	0.188
2018-02-18 11:02:44		-0.2	-0.313	0.01	0.188	0.05	0.188
2018-02-18 12:02:41		-0.18	-0.188	0.02	0.188	0.05	0.188
2018-02-18 13:02:41		-0.15	-0.063	0.02	0.188	0.05	0.188
2018-02-18 14:02:46		-0.06	0.563	0.02	0.125	0.05	0.188
2018-02-18 15:02:42		0.02	1.313	0	0.188	0.05	0.188
2018-02-18 16:02:45		0.08	2	0	0.188	0.04	0.25
2018-02-18 17:02:45		0.03	1.813	0.01	0.125	0.05	0.25
2018-02-18 18:02:47		-0.07	1.125	0.02	0.125	0.06	0.188
2018-02-18 19:02:42		-0.19	0.313	0.02	0.125	0.03	0.188
2018-02-18 20:02:49		-0.28	-0.375	0	0.125	0.05	0.188
2018-02-18 21:02:42		-0.29	-0.625	-0.01	0.125	0.05	0.188
2018-02-18 22:02:45		-0.27	-0.563	0	0.125	0.04	0.188
2018-02-18 23:02:46		-0.22	-0.188	0.01	0.125	0.05	0.188
2018-02-19 00:02:46		-0.17	0.125	0	0.188	0.03	0.25
2018-02-19 01:02:46		-0.13	0.375	0	0.188	0.04	0.25
2018-02-19 02:02:50		-0.12	0.625	0	0.188	0.04	0.188
2018-02-19 03:02:43		-0.1	0.75	0	0.188	0.03	0.188
2018-02-19 04:02:46		-0.09	0.813	0	0.188	0.04	0.188
2018-02-19 05:02:46		-0.08	0.875	0	0.188	0.04	0.188
2018-02-19 06:02:47		-0.1	0.813	0	0.125	0.04	0.188
2018-02-19 07:02:43		-0.1	0.875	0	0.188	0.03	0.25
2018-02-19 08:02:50		-0.08	1	0	0.188	0.02	0.25
2018-02-19 09:02:44		-0.11	0.875	0	0.188	0.03	0.25
2018-02-19 10:02:43		-0.14	0.625	0.01	0.125	0.05	0.188
2018-02-19 11:02:44		-0.19	0.375	0	0.188	0.04	0.188
2018-02-19 12:02:43		-0.21	0.063	0	0.188	0.04	0.188
2018-02-19 13:02:44		-0.3	-0.375	0	0.188	0.03	0.188
2018-02-19 14:02:48		-0.4	-1.188	0.01	0.188	0.05	0.188
2018-02-19 15:02:47		-0.45	-1.688	0.01	0.188	0.03	0.188
2018-02-19 16:02:44		-0.53	-2.625	0.01	0.188	0.03	0.188
2018-02-19 17:02:46		-0.49	-2.625	0.01	0.188	0.03	0.188
2018-02-19 18:02:44		-0.37	-1.938	0	0.25	0.04	0.188
2018-02-19 19:02:43		-0.24	-0.938	0	0.25	0.04	0.188
2018-02-19 20:02:48		-0.13	-0.125	0	0.25	0.05	0.188
2018-02-19 21:02:45		-0.1	0.25	0.01	0.188	0.05	0.188
2018-02-19 22:02:44		-0.12	0.188	0	0.188	0.04	0.188
2018-02-19 23:02:44		-0.17	-0.188	0	0.188	0.03	0.188
2018-02-20 00:02:45		-0.23	-0.625	0.01	0.125	0.04	0.188
2018-02-20 01:02:44		-0.26	-1	0.01	0.125	0.04	0.125
2018-02-20 02:02:48		-0.29	-1.375	-0.01	0.063	0.04	0.188
2018-02-20 03:02:45		-0.33	-1.813	-0.01	0.125	0.03	0.188
2018-02-20 04:02:45		-0.34	-2	0	0.063	0.04	0.188
2018-02-20 05:02:44		-0.32	-2	0	0.063	0.04	0.188
2018-02-20 06:02:45		-0.3	-1.938	0	0.063	0.04	0.188
2018-02-20 07:02:45		-0.29	-2.063	0	0.063	0.04	0.125
2018-02-20 08:02:49		-0.28	-2.125	-0.01	0.063	0.04	0.125
2018-02-20 09:02:47		-0.29	-2.188	0	0.063	0.04	0.125
2018-02-20 10:02:44		-0.27	-2.188	-0.01	0.063	0.03	0.125
2018-02-20 11:02:48		-0.17	-2.125	-0.02	0.063	0.02	0.188
2018-02-20 12:02:45		-0.11	-1.75	-0.01	0	0.04	0.188
2018-02-20 13:02:45		0.01	-1.25	-0.02	0	0.04	0.188
2018-02-20 14:02:52		0.16	-0.125	-0.02	0	0.02	0.188
2018-02-20 15:02:42		0.22	0.313	-0.02	0	0.05	0.188
2018-02-20 16:02:46		0.24	0.625	-0.03	0	0.05	0.125
2018-02-20 17:02:42		0.21	0.5	-0.03	-0.063	0.03	0.125
2018-02-20 18:02:42		0.13	0	-0.02	-0.125	0.03	0.125
2018-02-20 19:02:42		0.05	-0.813	-0.02	-0.125	0.02	0.125
2018-02-20 20:02:48		-0.04	-1.313	-0.02	-0.125	0.01	0.125
2018-02-20 21:02:42		-0.08	-1.75	-0.02	-0.125	0.03	0.125
2018-02-20 22:02:45		-0.1	-1.938	-0.02	-0.125	0.02	0.188
2018-02-20 23:02:45		-0.08	-1.875	-0.05	-0.063	0.02	0.188
2018-02-21 00:02:45		-0.07	-1.813	-0.03	-0.125	0.03	0.125
2018-02-21 01:02:46		-0.07	-1.688	-0.03	-0.063	0.02	0.188
2018-02-21 02:02:50		-0.05	-1.563	-0.03	-0.063	0.03	0.125
2018-02-21 03:02:44		-0.03	-1.375	-0.02	-0.125	0.03	0.125
2018-02-21 04:02:43		-0.03	-1.375	-0.04	-0.063	0.02	0.125
2018-02-21 05:02:45		-0.05	-1.375	-0.05	-0.063	0.03	0.125
2018-02-21 06:02:46		-0.06	-1.5	-0.03	-0.125	0.02	0.125
2018-02-21 07:02:43		-0.1	-1.563	-0.05	-0.063	0.04	0.063
2018-02-21 08:02:50		-0.11	-1.563	-0.03	-0.125	0.03	0.125
2018-02-21 09:02:42		-0.01	-1.125	-0.05	-0.125	0.03	0.125
2018-02-21 10:02:49		0.17	0.063	-0.04	-0.188	0.03	0.125
2018-02-21 12:04:21		0.3	1.625	-0.03	-0.188	0.03	0.125
2018-02-21 12:04:22		0.41	2.688	-0.04	-0.125	0.03	0.063
2018-02-21 14:02:51		0.5	3.625	-0.05	-0.188	0.02	0.063
2018-02-21 14:02:51		0.5	3.875	-0.05	-0.188	0.02	0.063
2018-02-21 15:02:50		0.52	4.25	-0.06	-0.188	0.01	0.063
2018-02-21 16:02:51		0.5	4.188	-0.05	-0.25	0	0.063
2018-02-21 17:03:05		0.45	4	-0.05	-0.188	0	0.125
2018-02-21 18:02:46		0.37	3.688	-0.06	-0.188	0	0.125
2018-02-21 19:02:45		0.3	3.5	-0.05	-0.188	0.01	0.063
2018-02-21 20:04:47		0.27	3.188	-0.05	-0.125	0.01	0.125
2018-02-21 21:02:47		0.22	3	-0.05	-0.125	-0.01	0.125
2018-02-21 22:02:50		0.18	2.75	-0.05	-0.063	0	0
2018-02-21 23:02:51		0.11	2.25	-0.02	-0.125	-0.01	0.063
2018-02-22 00:02:48		0.08	2.125	-0.04	0	0	0
2018-02-22 01:02:47		0.05	1.938	-0.04	0	0	0
2018-02-22 02:02:55		0.04	1.875	-0.03	0	-0.02	0.063
2018-02-22 03:02:42		0.03	1.875	-0.03	0	-0.01	0.063
2018-02-22 04:02:45		0.04	1.938	-0.02	0.063	-0.01	0.063
2018-02-22 05:02:45		0.05	1.938	-0.01	0.063	-0.02	0.063
2018-02-22 06:02:45		0.03	1.938	-0.03	0.125	-0.02	0.063
2018-02-22 07:02:45		0.05	1.938	-0.01	0.063	-0.02	0.125
2018-02-22 08:02:49		0.07	2.063	-0.02	0.125	-0.01	0.063
2018-02-22 09:02:42		0.09	2.313	-0.01	0.125	-0.02	0.063
2018-02-22 10:02:47		0.05	2.25	-0.01	0.188	-0.01	0.063
2018-02-22 11:03:27		0.06	2.188	-0.01	0.188	0	0
2018-02-22 12:04:01		0.09	2.375	-0.01	0.188	-0.02	0.063
2018-02-22 13:03:04		0.08	2.5	0	0.25	-0.01	0.063
2018-02-22 14:03:33		0.1	2.625	0	0.188	-0.02	0.063
2018-02-22 15:03:15		0.11	2.688	0.01	0.25	-0.03	0.063
2018-02-22 16:02:47		0.1	2.813	0.01	0.313	-0.03	0.063
2018-02-22 17:02:42		0.07	2.688	0.01	0.25	-0.03	0
2018-02-22 18:02:45		0.08	2.813	0.02	0.313	-0.02	0
2018-02-22 19:02:59		0.09	2.813	0.01	0.313	-0.03	0.063
2018-02-22 20:02:47		0.1	3	0.02	0.313	-0.03	0
2018-02-22 21:02:43		0.11	3	0.03	0.375	-0.03	0
2018-02-22 22:02:43		0.09	2.938	0.04	0.313	-0.04	0.125
2018-02-22 23:02:42		0.07	2.875	0.02	0.438	-0.02	0
2018-02-23 00:02:46		0.05	2.688	0.03	0.438	-0.03	0.063
2018-02-23 01:02:46		0.05	2.5	0.04	0.375	-0.04	0.125
2018-02-23 02:02:51		0.03	2.5	0.06	0.438	-0.03	0.063
2018-02-23 03:02:46		0.02	2.375	0.05	0.5	-0.03	0.063
2018-02-23 04:02:47		-0.06	1.875	0.06	0.438	-0.03	0.063
2018-02-23 05:02:44		-0.12	1.375	0.07	0.5	-0.02	0.063
2018-02-23 06:02:45		-0.08	1.688	0.07	0.5	-0.02	0.063
2018-02-23 07:02:43		-0.05	1.938	0.07	0.563	-0.03	0.063
2018-02-23 08:02:50		-0.07	1.875	0.08	0.563	-0.02	0.063
2018-02-23 09:02:43		-0.19	1.188	0.07	0.625	-0.01	0.063
2018-02-23 10:03:20		-0.32	0.25	0.07	0.625	-0.02	0.063
2018-02-23 12:03:18		-0.51	-0.938	0.08	0.625	-0.02	0.125
2018-02-23 12:03:18		-0.71	-2.5	0.08	0.625	-0.02	0.125
2018-02-23 13:02:45		-0.87	-3.875	0.08	0.625	-0.01	0.125
2018-02-23 14:02:57		-0.97	-4.813	0.08	0.688	0	0.125
2018-02-23 15:03:17		-1.02	-5.438	0.08	0.625	0.01	0.125
2018-02-23 16:03:28		-1.02	-5.625	0.08	0.625	0.02	0.125
2018-02-23 17:02:53		-0.97	-5.5	0.08	0.688	0.03	0.125
2018-02-23 18:02:51		-0.9	-5.25	0.08	0.625	0.01	0.188
2018-02-23 19:02:47		-0.84	-4.938	0.08	0.625	0.02	0.188
2018-02-23 20:02:54		-0.79	-4.75	0.07	0.563	0.02	0.188
2018-02-23 21:02:41		-0.75	-4.688	0.06	0.5	0.03	0.188
2018-02-23 22:02:45		-0.72	-4.688	0.05	0.5	0.04	0.125
2018-02-23 23:02:41		-0.69	-4.625	0.06	0.438	0.03	0.188
2018-02-24 00:02:44		-0.66	-4.5	0.05	0.375	0.04	0.188
2018-02-24 01:02:44		-0.66	-4.313	0.04	0.375	0.05	0.125
2018-02-24 02:02:48		-0.65	-4.438	0.03	0.313	0.06	0.125
2018-02-24 03:02:45		-0.64	-4.563	0.02	0.25	0.04	0.188
2018-02-24 04:02:44		-0.61	-4.375	0.01	0.25	0.04	0.188
2018-02-24 05:02:45		-0.57	-4.125	0	0.188	0.04	0.188
2018-02-24 06:02:45		-0.6	-4.625	0	0.188	0.05	0.188
2018-02-24 07:02:45		-0.65	-5.063	-0.01	0.063	0.05	0.188
2018-02-24 08:02:50		-0.68	-4.625	-0.02	0.063	0.04	0.188
2018-02-24 09:02:46		-0.54	-3.875	-0.02	-0.063	0.05	0.188
2018-02-24 10:02:43		-0.36	-2.688	-0.03	-0.063	0.05	0.25
2018-02-24 11:03:51		-0.19	-1.438	-0.04	-0.063	0.06	0.125
2018-02-24 12:02:29		0.01	0	-0.04	-0.125	0.05	0.188
2018-02-24 13:02:42		0.18	1.438	-0.05	-0.125	0.05	0.188
2018-02-24 14:02:49		0.27	2.438	-0.05	-0.188	0.05	0.188
2018-02-24 15:02:44		0.3	2.938	-0.05	-0.25	0.05	0.188
2018-02-24 16:03:00		0.28	2.938	-0.06	-0.25	0.05	0.188
2018-02-24 17:02:45		0.26	2.875	-0.07	-0.25	0.05	0.188
2018-02-24 18:02:45		0.2	2.563	-0.08	-0.25	0.05	0.188
2018-02-24 19:02:43		0.14	2.188	-0.07	-0.25	0.04	0.188
2018-02-24 20:04:07		0.07	1.75	-0.07	-0.25	0.04	0.188
2018-02-24 21:02:42		0.05	1.75	-0.07	-0.25	0.04	0.125
2018-02-24 22:02:44		0.07	2.125	-0.07	-0.188	0.04	0.188
2018-02-24 23:02:43		0.12	2.625	-0.07	-0.25	0.04	0.188
2018-02-25 00:02:43		0.15	2.938	-0.06	-0.188	0.03	0.188
2018-02-25 01:02:43		0.18	3.125	-0.06	-0.188	0.03	0.188
2018-02-25 02:02:46		0.18	3.313	-0.07	-0.125	0.02	0.188
2018-02-25 03:02:44		0.18	3.5	-0.05	-0.125	0.04	0.125
2018-02-25 04:02:43		0.21	3.813	-0.05	-0.125	0.04	0.125
2018-02-25 05:02:46		0.24	4.25	-0.05	-0.063	0.03	0.125
2018-02-25 06:02:46		0.27	4.625	-0.05	-0.063	0.02	0.125
2018-02-25 07:02:46		0.29	4.875	-0.04	0	0.03	0.125
2018-02-25 08:02:49		0.33	4.5	-0.04	0	0.03	0.125
2018-02-25 09:02:43		0.26	4.125	-0.03	0.063	0	0.188
2018-02-25 10:02:45		0.16	3.563	-0.02	0.063	0.02	0.063
2018-02-25 11:04:04		0.09	3.125	-0.02	0.063	0.01	0.125
2018-02-25 12:02:34		0.03	2.875	-0.01	0.125	0.02	0.063
2018-02-25 13:02:44		0	2.563	0	0.125	0.01	0.063
2018-02-25 14:02:49		-0.03	2.313	-0.01	0.188	0.01	0.125
2018-02-25 15:02:44		-0.01	2.375	-0.01	0.25	0.01	0.125
2018-02-25 16:03:15		0.01	2.625	0	0.25	0.01	0.125
2018-02-25 17:02:45		0.01	2.688	0.01	0.25	-0.01	0.125
2018-02-25 18:02:44		0	2.625	0.03	0.25	0.02	0.063
2018-02-25 19:02:44		-0.01	2.625	0.01	0.313	0.02	0.063
2018-02-25 20:02:47		0.01	2.75	0.02	0.313	0.01	0.063
2018-02-25 21:02:45		-0.02	2.625	0.02	0.375	0.01	0.125
2018-02-25 22:02:44		-0.04	2.375	0.04	0.375	0	0.063
2018-02-25 23:02:44		-0.1	2	0.04	0.438	0.01	0.063
2018-02-26 00:02:44		-0.12	1.75	0.04	0.375	0.01	0.063
2018-02-26 01:02:46		-0.14	1.625	0.04	0.438	0.01	0.125
2018-02-26 02:02:45		-0.13	1.688	0.04	0.438	0.01	0.063
2018-02-26 03:02:45		-0.12	1.875	0.04	0.5	0.01	0.125
2018-02-26 04:02:44		-0.1	1.875	0.04	0.5	0.01	0.125
2018-02-26 05:02:44		-0.1	1.875	0.05	0.438	0.01	0.063
2018-02-26 06:02:43		-0.13	1.688	0.05	0.5	0.01	0.125
2018-02-26 07:02:41		-0.15	1.563	0.06	0.5	0	0.125
2018-02-26 08:02:51		-0.14	1.625	0.06	0.5	0.01	0.125
2018-02-26 09:02:46		-0.11	1.875	0.06	0.5	0.03	0.063
2018-02-26 10:02:47		-0.13	1.813	0.05	0.563	0.01	0.125
2018-02-26 12:02:30		-0.08	2	0.06	0.563	0.02	0.125
2018-02-26 12:02:30		-0.13	1.938	0.05	0.563	0.02	0.125
2018-02-26 13:02:45		-0.26	1	0.06	0.563	0.01	0.188
2018-02-26 14:02:52		-0.35	0.313	0.06	0.563	0.02	0.125
2018-02-26 15:02:48		-0.54	-1	0.06	0.563	0.01	0.125
2018-02-26 16:02:48		-0.6	-1.813	0.06	0.563	0.01	0.125
2018-02-26 17:02:46		-0.56	-1.688	0.05	0.625	0.04	0.125
2018-02-26 18:02:45		-0.46	-1.063	0.05	0.625	0.01	0.125
2018-02-26 19:02:45		-0.29	-0.25	0.06	0.625	0.03	0.125
2018-02-26 20:02:49		-0.12	0.125	0.05	0.625	0.04	0.188
2018-02-26 21:02:46		0.23	0.375	0.07	0.625	0.03	0.188
2018-02-26 22:02:46		0.67	0.625	0.05	0.625	0.04	0.188
2018-02-26 23:02:45		1.12	0.938	0.06	0.563	0.03	0.188
2018-02-27 00:02:45		1.46	1	0.04	0.625	0.04	0.188
2018-02-27 01:02:44		1.67	0.938	0.06	0.563	0.04	0.125
2018-02-27 02:02:47		1.83	0.813	0.05	0.563	0.04	0.188
2018-02-27 03:02:42		1.96	0.625	0.04	0.5	0.04	0.125
2018-02-27 04:02:46		2.16	0.5	0.05	0.563	0.04	0.188
2018-02-27 05:02:42		2.3	0.25	0.04	0.563	0.04	0.25
2018-02-27 06:02:45		2.46	0.125	0.05	0.563	0.04	0.188
2018-02-27 07:02:48		2.61	0.063	0.04	0.563	0.04	0.188
2018-02-27 08:02:47		2.71	-0.25	0.04	0.563	0.04	0.188
2018-02-27 09:02:45		2.72	-1	0.04	0.563	0.02	0.25
2018-02-27 10:02:46		2.83	-1.438	0.05	0.5	0.03	0.25
2018-02-27 11:03:53		2.85	-2	0.04	0.5	0.02	0.25
2018-02-27 12:02:27		2.96	-2.438	0.04	0.5	0.03	0.25
2018-02-27 13:02:43		3.15	-1.688	0.02	0.563	0.05	0.188
2018-02-27 14:02:56		3.22	-1.75	0.04	0.5	0.04	0.25
2018-02-27 15:02:45		3.39	-1	0.04	0.5	0.05	0.25
2018-02-27 16:03:57		3.47	-0.5	0.03	0.5	0.05	0.25
2018-02-27 17:03:01		3.48	-0.5	0.05	0.438	0.05	0.25
2018-02-27 18:02:43		3.46	-0.688	0.04	0.438	0.05	0.25
2018-02-27 19:02:44		3.37	-0.938	0.03	0.438	0.04	0.313
2018-02-27 20:02:54		3.25	-0.938	0.04	0.438	0.05	0.188
2018-02-27 21:02:43		2.95	-0.75	0.03	0.375	0.04	0.25
2018-02-27 22:02:43		2.54	-0.688	0.02	0.375	0.05	0.25
2018-02-27 23:02:43		2.13	-0.75	0.02	0.438	0.06	0.25
2018-02-28 00:02:43		1.82	-0.625	0.03	0.375	0.05	0.25
2018-02-28 01:02:43		1.64	-0.375	0.01	0.375	0.05	0.25
2018-02-28 02:02:47		1.52	-0.063	0.03	0.375	0.05	0.313
2018-02-28 03:02:43		1.42	0.25	0.04	0.375	0.04	0.313
2018-02-28 04:02:44		1.25	0.688	0.03	0.313	0.05	0.25
2018-02-28 05:02:43		1.11	0.875	0.03	0.313	0.05	0.25
2018-02-28 06:02:43		0.95	1	0.01	0.313	0.06	0.25
2018-02-28 07:02:42		0.8	1.063	0.01	0.313	0.07	0.25
2018-02-28 08:02:49		0.64	1.063	0.01	0.313	0.07	0.25
2018-02-28 09:02:44		0.52	1	0.01	0.313	0.06	0.25
2018-02-28 10:03:15		0.25	0.313	0.01	0.313	0.06	0.25
2018-02-28 11:03:10		-0.02	-0.938	0	0.313	0.07	0.25
2018-02-28 12:03:30		-0.28	-2.063	0	0.313	0.06	0.25
2018-02-28 13:02:52		-0.52	-3.438	0.02	0.25	0.05	0.25
2018-02-28 14:02:48		-0.65	-4.188	0.01	0.313	0.05	0.25
2018-02-28 15:03:15		-0.75	-4.625	0.01	0.313	0.05	0.25
2018-02-28 16:02:42		-0.8	-5	0.01	0.313	0.06	0.25
2018-02-28 17:04:20		-0.8	-4.938	0	0.313	0.04	0.25
2018-02-28 18:02:51		-0.75	-4.625	0	0.313	0.04	0.313
2018-02-28 19:03:04		-0.67	-4.125	0	0.25	0.06	0.188
2018-02-28 20:02:45		-0.61	-3.688	0	0.188	0.04	0.313
2018-02-28 21:02:41		-0.56	-3.375	-0.01	0.188	0.05	0.25
2018-02-28 22:02:44		-0.53	-3.188	-0.01	0.125	0.06	0.25
2018-02-28 23:02:45		-0.52	-3	-0.02	0.063	0.05	0.25
2018-03-01 00:02:44		-0.53	-2.938	-0.02	0.063	0.05	0.25
2018-03-01 01:02:45		-0.53	-2.875	-0.02	0	0.06	0.25
2018-03-01 02:02:48		-0.56	-3	-0.03	-0.063	0.05	0.25
2018-03-01 03:02:45		-0.58	-3.063	-0.05	-0.063	0.07	0.25
2018-03-01 04:02:44		-0.62	-3.25	-0.05	-0.063	0.05	0.25
2018-03-01 05:02:44		-0.62	-3.188	-0.05	-0.063	0.06	0.25
2018-03-01 06:02:45		-0.62	-3.063	-0.05	-0.125	0.05	0.25
2018-03-01 07:02:45		-0.67	-3.25	-0.05	-0.188	0.05	0.25
2018-03-01 08:02:49		-0.65	-3.25	-0.06	-0.188	0.04	0.25
2018-03-01 09:02:44		-0.55	-2.563	-0.06	-0.25	0.06	0.188
2018-03-01 10:02:43		-0.33	-1.313	-0.06	-0.25	0.05	0.25
2018-03-01 11:03:59		-0.11	0.25	-0.06	-0.25	0.05	0.188
2018-03-01 12:02:42		0.12	1.813	-0.07	-0.313	0.04	0.25
2018-03-01 13:02:50		0.32	3.313	-0.08	-0.313	0.05	0.25
2018-03-01 14:02:50		0.44	4.313	-0.08	-0.313	0.05	0.188
2018-03-01 15:02:45		0.51	4.75	-0.1	-0.375	0.05	0.188
2018-03-01 16:02:46		0.54	5.125	-0.09	-0.375	0.04	0.188
2018-03-01 17:02:44		0.53	5	-0.1	-0.375	0.05	0.188
2018-03-01 18:03:02		0.46	4.75	-0.09	-0.375	0.05	0.188
2018-03-01 19:03:00		0.38	4.313	-0.08	-0.375	0.04	0.188
2018-03-01 20:03:14		0.32	3.938	-0.09	-0.25	0.05	0.188
2018-03-01 21:02:45		0.27	3.688	-0.08	-0.25	0.04	0.125
2018-03-01 22:02:45		0.24	3.563	-0.08	-0.188	0.02	0.188
2018-03-01 23:02:46		0.23	3.5	-0.06	-0.25	0.03	0.125
2018-03-02 00:02:43		0.22	3.438	-0.07	-0.188	0.03	0.125
2018-03-02 01:02:46		0.2	3.313	-0.07	-0.063	0.02	0.188
2018-03-02 02:02:50		0.19	3.313	-0.06	-0.063	0.02	0.125
2018-03-02 03:02:44		0.17	3.188	-0.06	0	0.02	0.063
2018-03-02 04:02:43		0.17	3.188	-0.04	0	0.03	0.125
2018-03-02 05:02:47		0.16	3.125	-0.04	0	0.02	0.125
2018-03-02 06:02:43		0.16	3.125	-0.03	0.063	0.02	0.125
2018-03-02 07:02:46		0.24	3.438	-0.03	0.125	0.01	0.125
2018-03-02 08:02:50		0.26	3.625	-0.02	0.125	0.02	0.125
2018-03-02 09:02:43		0.17	3.188	-0.02	0.188	0.01	0.125
2018-03-02 10:02:44		0.03	2.25	-0.02	0.25	0.01	0.063
2018-03-02 11:02:44		-0.14	1.063	-0.01	0.25	0.01	0.125
2018-03-02 12:02:47		-0.31	-0.188	0.01	0.313	0.02	0.063
2018-03-02 13:02:43		-0.46	-1.313	0.01	0.313	0.01	0.063
2018-03-02 14:02:50		-0.51	-1.875	0.01	0.313	0	0.125
2018-03-02 15:03:59		-0.49	-1.75	0.03	0.375	0.02	0.063
2018-03-02 16:03:16		-0.42	-1.5	0.02	0.438	0.01	0.063
2018-03-02 17:02:47		-0.34	-0.938	0.04	0.375	0.01	0.125
2018-03-02 18:02:43		-0.23	-0.25	0.03	0.375	0.02	0.063
2018-03-02 19:02:46		-0.11	0.438	0.02	0.438	0.01	0.125
2018-03-02 20:02:47		-0.04	1	0.03	0.375	0.01	0.063
2018-03-02 21:02:45		0.03	1.375	0.03	0.375	0.03	0.125
2018-03-02 22:02:45		0.07	1.688	0.04	0.313	0.02	0.063
2018-03-02 23:02:45		0.1	1.813	0.02	0.438	0.02	0.125
2018-03-03 00:02:44		0.12	1.938	0.03	0.375	0.01	0.125
2018-03-03 01:02:44		0.14	2.063	0.04	0.313	0.02	0.063
2018-03-03 02:02:48		0.16	2.125	0.02	0.375	0.03	0.063
2018-03-03 03:02:44		0.2	2.313	0.04	0.313	0.01	0.188
2018-03-03 04:02:44		0.28	2.313	0.02	0.375	0.01	0.125
2018-03-03 05:02:45		0.75	2.313	0.03	0.375	0.01	0.125
2018-03-03 06:02:45		2.4	2.375	0.03	0.375	0.03	0.063
2018-03-03 07:02:46		4.11	2.438	0.04	0.313	0.02	0.125
2018-03-03 08:02:48		6.57	2.438	0.04	0.375	0.01	0.125
2018-03-03 09:02:46		13.32	2.375	0.03	0.438	0.02	0.188
2018-03-03 10:02:42		13.85	2.188	0.04	0.375	0.02	0.188
2018-03-03 11:02:46		14.54	1.688	0.05	0.375	0	0.125
2018-03-03 12:02:43		16.18	1	0.04	0.375	0.01	0.188
2018-03-03 13:02:49		14.87	0.313	0.04	0.438	0.01	0.188
2018-03-03 14:02:48		14.08	-0.25	0.05	0.438	0.03	0.125
2018-03-03 15:02:45		13.66	-1.125	0.05	0.438	0.01	0.188
2018-03-03 16:02:45		13.43	-1.75	0.06	0.438	0.02	0.188
2018-03-03 17:02:47		13.36	-2.375	0.05	0.5	0.02	0.125
2018-03-03 18:02:42		13.31	-2.938	0.05	0.5	0.02	0.125
2018-03-03 19:02:44		12.9	-3.313	0.07	0.438	0.03	0.188
2018-03-03 20:02:49		12.63	-3.688	0.06	0.438	0.03	0.188
2018-03-03 21:02:43		12.38	-3.938	0.05	0.438	0.02	0.188
2018-03-03 22:02:46		12.22	-4.25	0.05	0.5	0.04	0.188
2018-03-03 23:02:46		12.04	-4.438	0.05	0.438	0.03	0.188
2018-03-04 00:02:46		11.87	-4.563	0.05	0.438	0.04	0.188
2018-03-04 01:02:46		11.71	-4.875	0.04	0.438	0.04	0.188
2018-03-04 02:02:49		11.54	-5.25	0.05	0.375	0.06	0.188
2018-03-04 03:02:46		11.39	-5.75	0.03	0.375	0.08	0.188
2018-03-04 04:02:45		11.18	-6.125	0.03	0.25	0.08	0.188
2018-03-04 05:02:47		10.6	-6.375	0.01	0.25	0.09	0.188
2018-03-04 06:02:42		8.87	-6.625	0.02	0.188	0.07	0.25
2018-03-04 07:02:45		7.06	-6.938	-0.01	0.188	0.06	0.188
2018-03-04 08:02:49		4.52	-6.875	-0.02	0.125	0.07	0.188
2018-03-04 09:02:42		-2.28	-6.625	0	0	0.08	0.125
2018-03-04 10:02:44		-2.87	-5.625	-0.03	0	0.07	0.188
2018-03-04 11:02:45		-3.57	-3.938	-0.04	-0.063	0.1	0.188
2018-03-04 12:02:46		-5.26	-1.875	-0.05	-0.063	0.08	0.188
2018-03-04 13:02:44		-4.05	-0.25	-0.05	-0.188	0.08	0.188
2018-03-04 14:02:50		-3.39	0.688	-0.06	-0.25	0.07	0.188
2018-03-04 15:02:41		-3.14	1.25	-0.07	-0.25	0.07	0.188
2018-03-04 16:02:42		-3.08	1.375	-0.08	-0.313	0.07	0.188
2018-03-04 17:02:46		-3.12	1.188	-0.07	-0.375	0.07	0.188
2018-03-04 18:02:42		-3.16	1.063	-0.08	-0.375	0.08	0.188
2018-03-04 19:02:47		-2.8	0.875	-0.09	-0.438	0.08	0.125
2018-03-04 20:02:48		-2.58	0.875	-0.09	-0.438	0.09	0.125
2018-03-04 21:02:44		-2.36	0.75	-0.09	-0.438	0.08	0.188
2018-03-04 22:02:45		-2.25	0.688	-0.08	-0.438	0.07	0.188
2018-03-04 23:02:44		-2.13	0.375	-0.08	-0.438	0.08	0.188
2018-03-05 00:02:43		-2.02	0.063	-0.08	-0.438	0.08	0.188
2018-03-05 01:02:46		-1.92	-0.063	-0.08	-0.438	0.06	0.188
2018-03-05 02:02:50		-1.77	0.188	-0.08	-0.438	0.04	0.188
2018-03-05 03:02:44		-1.68	0.375	-0.07	-0.375	0.04	0.125
2018-03-05 04:02:43		-1.58	0.625	-0.08	-0.313	0.03	0.125
2018-03-05 05:02:45		-1.48	0.813	-0.06	-0.313	0.03	0.125
2018-03-05 06:02:43		-1.39	1	-0.07	-0.375	0.03	0.125
2018-03-05 07:02:43		-1.32	1.063	-0.05	-0.313	0.04	0.125
2018-03-05 08:02:48		-1.25	1.125	-0.04	-0.313	0.03	0.125
2018-03-05 09:02:45		-1.19	1.313	-0.05	-0.25	0.02	0.125
2018-03-05 10:02:45		-1.16	0.875	-0.03	-0.313	0.03	0.063
2018-03-05 11:02:43		-1.17	0.125	-0.04	-0.25	0.02	0.125
2018-03-05 12:03:01		-1.16	-1	-0.04	-0.25	0.02	0
2018-03-05 13:03:10		-1.11	-1.625	-0.03	-0.188	0.03	0.063
2018-03-05 14:02:48		-1.07	-1.938	-0.03	-0.188	0.02	0.063
2018-03-05 15:02:44		-1.01	-1.875	-0.02	-0.25	0.02	0.063
2018-03-05 16:02:45		-0.95	-1.875	-0.01	-0.25	0.02	0.063
2018-03-05 17:03:16		-0.92	-1.563	-0.02	-0.188	0.02	0.063
2018-03-05 18:02:45		-0.88	-1.313	-0.02	-0.188	0.01	0.125
2018-03-05 19:02:45		-0.87	-1.063	-0.02	-0.125	0.01	0.063
2018-03-05 20:02:50		-0.83	-0.875	-0.01	-0.125	0.01	0.063
2018-03-05 21:02:44		-0.8	-0.625	-0.01	-0.125	0.01	0
2018-03-05 22:02:43		-0.75	-0.313	-0.02	-0.188	0.02	0
2018-03-05 23:02:41		-0.7	0.063	-0.02	-0.188	0.01	0
2018-03-06 00:02:44		-0.65	0.438	-0.02	-0.188	0.01	0
2018-03-06 01:02:44		-0.59	0.813	-0.01	-0.188	0.01	0
2018-03-06 02:02:48		-0.61	0.813	-0.01	-0.188	0.02	0
2018-03-06 03:02:45		-0.61	0.813	-0.01	-0.25	0	0
2018-03-06 04:02:46		-0.6	0.75	0.01	-0.25	0.01	0
2018-03-06 05:02:45		-0.6	0.813	0	-0.25	-0.01	0.063
2018-03-06 06:02:46		-0.58	0.813	0	-0.188	0	0
2018-03-06 07:02:46		-0.55	1.063	0	-0.188	0.01	0
2018-03-06 09:02:45		-0.54	0.938	0	-0.188	0	0
2018-03-06 09:02:45		-0.56	0.563	0	-0.188	0	0
2018-03-06 10:04:06		-0.58	0.063	-0.01	-0.188	0	0
2018-03-06 11:02:51		-0.58	-0.438	0.01	-0.188	-0.01	0
2018-03-06 12:03:56		-0.61	-0.813	0.01	-0.188	0	0.063
2018-03-06 13:02:29		-0.61	-1.125	0.01	-0.188	-0.01	0
2018-03-06 14:02:51		-0.57	-1.125	0.01	-0.188	0	0
2018-03-06 15:02:46		-0.51	-1	0.01	-0.125	0	0
2018-03-06 16:02:45		-0.46	-0.563	0	-0.125	0	0
2018-03-06 17:02:46		-0.41	0.063	0.01	-0.125	0	0
2018-03-06 18:02:42		-0.44	0	0.01	-0.125	0	-0.063
2018-03-06 19:02:47		-0.47	-0.188	0.01	-0.125	-0.01	0
2018-03-06 20:02:46		-0.48	-0.5	0.01	-0.125	-0.02	0
2018-03-06 21:02:43		-0.52	-0.75	0	-0.125	-0.01	0
2018-03-06 22:02:43		-0.54	-1.063	0.02	-0.188	-0.02	0
2018-03-06 23:02:46		-0.57	-1.313	0.01	-0.125	-0.02	0
2018-03-07 00:02:52		-0.6	-1.625	0.01	-0.188	-0.04	0
2018-03-07 01:02:43		-0.64	-2	0	-0.125	-0.01	0
2018-03-07 02:03:08		-0.62	-2.25	0.01	-0.188	-0.02	0
2018-03-07 03:02:43		-0.57	-1.875	0	-0.125	-0.03	0
2018-03-07 04:02:43		-0.51	-1.563	-0.01	-0.125	-0.01	0
2018-03-07 05:02:43		-0.51	-1.813	0	-0.188	0	-0.063
2018-03-07 06:02:44		-0.55	-2	-0.01	-0.188	-0.03	0
2018-03-07 07:02:44		-0.54	-1.75	0	-0.188	-0.02	0
2018-03-07 08:03:36		-0.5	-1.563	0	-0.25	-0.01	0
2018-03-07 09:02:44		-0.44	-1.188	0	-0.25	-0.01	0
2018-03-07 10:04:05		-0.36	-0.313	0.01	-0.188	-0.01	0
2018-03-07 11:02:27		-0.27	0.813	-0.02	-0.188	0	0
2018-03-07 12:02:49		-0.19	2.063	-0.01	-0.25	-0.01	-0.063
2018-03-07 13:02:46		-0.17	2.813	-0.01	-0.25	-0.01	-0.063
2018-03-07 14:02:52		-0.2	3.25	-0.02	-0.25	-0.01	0
2018-03-07 15:02:44		-0.26	3.313	-0.03	-0.25	-0.01	-0.063
2018-03-07 16:02:45		-0.35	2.938	-0.02	-0.25	-0.03	0
2018-03-07 17:02:45		-0.51	2.125	-0.03	-0.25	-0.03	0
2018-03-07 18:02:44		-0.63	1.438	-0.02	-0.25	-0.03	0
2018-03-07 19:02:45		-0.74	0.688	-0.02	-0.25	-0.03	0
2018-03-07 20:02:52		-0.87	0.125	-0.03	-0.25	-0.02	-0.063
2018-03-07 21:02:44		-0.95	-0.375	-0.02	-0.25	-0.04	-0.063
2018-03-07 22:02:47		-1	-0.75	-0.03	-0.125	-0.04	-0.063
2018-03-07 23:02:44		-1.03	-0.938	-0.02	-0.188	-0.04	-0.063
2018-03-08 00:02:44		-1.06	-1	-0.01	-0.125	-0.02	-0.063
2018-03-08 01:02:44		-1.08	-0.875	-0.01	-0.125	-0.04	-0.063
2018-03-08 02:02:48		-1.12	-0.75	-0.02	-0.063	-0.04	-0.063
2018-03-08 03:02:45		-1.19	-1.063	-0.01	-0.125	-0.02	-0.063
2018-03-08 04:02:44		-1.27	-1.375	-0.01	-0.125	-0.04	-0.063
2018-03-08 05:02:45		-1.3	-1.188	-0.02	-0.063	-0.04	-0.063
2018-03-08 06:02:46		-1.33	-1.063	-0.02	-0.063	-0.02	-0.063
2018-03-08 07:02:46		-1.39	-1.375	-0.02	-0.125	-0.04	-0.063
2018-03-08 08:02:49		-1.45	-1.563	-0.03	-0.063	-0.03	-0.063
2018-03-08 09:02:48		-1.44	-2	-0.03	-0.063	-0.02	-0.063
2018-03-08 10:02:45		-1.31	-2.125	-0.04	-0.125	-0.03	-0.063
2018-03-08 11:02:45		-1.15	-1.625	-0.02	-0.125	-0.03	-0.063
2018-03-08 12:02:44		-0.99	-1.25	-0.02	-0.125	-0.02	-0.063
2018-03-08 13:02:47		-0.86	-0.875	-0.03	-0.125	-0.03	0
2018-03-08 14:02:46		-0.75	-0.5	-0.02	-0.125	-0.03	-0.063
2018-03-08 15:02:48		-0.67	-0.313	-0.03	-0.125	-0.03	0
2018-03-08 16:02:46		-0.61	0	-0.03	-0.188	-0.02	-0.063
2018-03-08 17:02:42		-0.55	0.25	-0.03	-0.188	-0.02	-0.063
2018-03-08 18:02:44		-0.49	0.563	-0.03	-0.188	-0.01	-0.063
2018-03-08 19:02:43		-0.47	1.063	-0.03	-0.188	-0.01	-0.063
2018-03-08 20:02:46		-0.44	1.438	-0.02	-0.188	-0.03	0
2018-03-08 21:02:42		-0.42	1.75	-0.01	-0.188	0	0
2018-03-08 22:02:46		-0.43	2	-0.02	-0.188	-0.01	0
2018-03-09 00:02:43		-0.43	2.25	-0.02	-0.188	0.01	-0.063
2018-03-09 00:02:43		-0.41	2.438	-0.02	-0.188	-0.01	0
2018-03-09 01:02:46		-0.4	2.563	0	-0.25	0	-0.063
2018-03-09 02:02:50		-0.39	2.563	-0.01	-0.188	0	-0.063
2018-03-09 03:02:43		-0.37	2.563	0	-0.188	0	-0.063
2018-03-09 04:02:43		-0.35	2.625	0.01	-0.188	0	-0.063
2018-03-09 05:02:43		-0.32	2.625	0	-0.125	-0.01	-0.063
2018-03-09 06:02:44		-0.28	2.688	0.01	-0.125	-0.01	-0.063
2018-03-09 07:03:30		-0.24	2.688	0.01	-0.063	-0.01	-0.063
2018-03-09 08:02:39		-0.22	2.813	0.03	-0.063	-0.02	-0.063
2018-03-09 09:02:45		0	4.625	0.02	-0.063	-0.02	-0.063
2018-03-09 10:02:45		0.02	5.5	0.02	0	-0.02	-0.063
2018-03-09 11:02:43		-0.04	5.438	0.02	0	-0.03	-0.063
2018-03-09 12:02:45		-0.05	5.25	0.02	0	-0.03	0
2018-03-09 13:02:44		-0.07	5	0.02	0.063	-0.02	-0.063
2018-03-09 14:02:49		-0.09	4.625	0.01	0.125	-0.02	-0.063
2018-03-09 15:02:43		-0.15	4.25	0.04	0.063	-0.02	-0.063
2018-03-09 16:02:44		-0.21	3.75	0.04	0.125	-0.02	-0.063
2018-03-09 17:02:45		-0.26	3.188	0.04	0.188	-0.02	-0.125
2018-03-09 18:02:44		-0.3	2.875	0.06	0.188	-0.05	-0.063
2018-03-09 19:02:43		-0.34	2.625	0.06	0.25	-0.04	-0.063
2018-03-09 20:02:48		-0.36	2.438	0.06	0.313	-0.03	-0.063
2018-03-09 21:02:45		-0.38	2.313	0.06	0.375	-0.04	-0.063
2018-03-09 22:02:44		-0.4	2.125	0.07	0.375	-0.03	-0.063
2018-03-09 23:02:44		-0.42	1.938	0.07	0.438	-0.03	0
2018-03-10 00:02:44		-0.44	1.875	0.09	0.438	-0.03	-0.063
2018-03-10 01:02:45		-0.45	1.75	0.07	0.5	-0.04	0
2018-03-10 02:02:49		-0.47	1.563	0.09	0.5	-0.04	0
2018-03-10 03:02:41		-0.48	1.438	0.09	0.563	-0.03	-0.063
2018-03-10 04:02:44		-0.5	1.25	0.09	0.563	-0.04	0
2018-03-10 05:02:44		-0.54	1.063	0.1	0.563	-0.03	0
2018-03-10 06:02:46		-0.55	0.875	0.11	0.563	-0.01	0
2018-03-10 07:02:45		-0.51	1.188	0.11	0.563	-0.01	0
2018-03-10 08:02:49		-0.36	1.813	0.09	0.625	-0.01	0
2018-03-10 10:02:29		-0.37	1.688	0.11	0.625	-0.01	0
2018-03-10 11:02:42		-0.28	2.125	0.11	0.625	0	0
2018-03-10 12:02:46		-0.2	2.375	0.1	0.625	-0.01	0
2018-03-10 13:03:21		-0.2	2.375	0.09	0.688	0	0
2018-03-10 14:02:53		-0.23	2.375	0.09	0.625	0	0
2018-03-10 15:02:41		-0.28	2.125	0.1	0.625	-0.02	0.063
2018-03-10 16:02:46		-0.32	2	0.09	0.688	-0.02	0.063
2018-03-10 17:02:42		-0.37	1.75	0.09	0.688	0	0
2018-03-10 18:02:53		-0.4	1.625	0.1	0.688	-0.01	0.125
2018-03-10 19:02:45		-0.46	1.438	0.09	0.688	0	0.063
2018-03-10 20:02:51		-0.47	1.313	0.1	0.688	0.01	0.063
2018-03-10 21:02:42		-0.48	1.313	0.11	0.688	0	0.063
2018-03-10 22:02:42		-0.5	1.25	0.1	0.688	0	0.125
2018-03-10 23:02:45		-0.51	1.188	0.1	0.688	0.01	0.063
2018-03-11 00:02:45		-0.53	1.125	0.1	0.688	-0.02	0.125
2018-03-11 01:02:45		-0.55	0.938	0.08	0.75	0.01	0.063
2018-03-11 02:02:49		-0.57	0.813	0.1	0.75	0.01	0.063
2018-03-11 03:02:42		-0.58	0.875	0.09	0.75	0	0.125
2018-03-11 04:02:45		-0.59	0.75	0.1	0.688	0	0.188
2018-03-11 05:02:46		-0.61	0.813	0.09	0.75	0.01	0.125
2018-03-11 06:02:46		-0.58	0.938	0.11	0.688	0.01	0.125
2018-03-11 07:02:48		-0.53	1.313	0.09	0.75	0	0.188
2018-03-11 08:02:47		-0.5	1.5	0.09	0.75	0.01	0.125
2018-03-11 09:02:49		-0.51	1.625	0.09	0.688	0.01	0.125
2018-03-11 10:02:47		-0.6	1.125	0.08	0.688	0.01	0.188
2018-03-11 11:02:43		-0.67	0.75	0.08	0.688	0.01	0.188
2018-03-11 12:02:43		-0.71	0.625	0.09	0.688	0.02	0.188
2018-03-11 13:02:47		-0.75	0.563	0.09	0.688	0.01	0.188
2018-03-11 14:02:49		-0.74	0.5	0.09	0.688	0	0.25
2018-03-11 15:02:43		-0.73	0.625	0.08	0.688	0.02	0.188
2018-03-11 16:02:45		-0.74	0.5	0.08	0.688	0.02	0.188
2018-03-11 17:02:42		-0.72	0.625	0.08	0.75	0.01	0.25
2018-03-11 18:02:47		-0.7	0.875	0.08	0.688	0.02	0.188
2018-03-11 19:02:44		-0.61	1.313	0.08	0.688	0.03	0.188
2018-03-11 20:02:47		-0.55	1.688	0.08	0.688	0.01	0.25
2018-03-11 21:02:45		-0.52	1.938	0.06	0.688	0.03	0.25
2018-03-11 22:02:47		-0.46	2.313	0.07	0.688	0.03	0.188
2018-03-11 23:02:43		-0.41	2.688	0.07	0.688	0.02	0.25
2018-03-12 00:02:44		-0.38	2.938	0.08	0.688	0.04	0.188
2018-03-12 01:02:45		-0.35	3.188	0.08	0.688	0.03	0.25
2018-03-12 02:02:47		-0.34	3.313	0.08	0.625	0.02	0.313
2018-03-12 03:02:45		-0.33	3.375	0.08	0.625	0.04	0.25
2018-03-12 04:02:45		-0.32	3.563	0.06	0.688	0.03	0.25
2018-03-12 05:02:44		-0.31	3.625	0.07	0.688	0.03	0.25
2018-03-12 06:02:44		-0.32	3.625	0.05	0.75	0.04	0.313
2018-03-12 07:02:44		-0.39	3.375	0.07	0.688	0.03	0.25
2018-03-12 08:02:50		-0.43	3.063	0.07	0.688	0.03	0.313
2018-03-12 09:02:46		-0.49	2.75	0.08	0.75	0.04	0.313
2018-03-12 10:02:48		-0.53	2.625	0.07	0.75	0.03	0.25
2018-03-12 11:02:41		-0.61	2.313	0.08	0.75	0.02	0.313
2018-03-12 12:02:44		-0.67	2.063	0.08	0.75	0.04	0.25
2018-03-12 13:02:46		-0.75	1.688	0.07	0.813	0.03	0.313
[truncated: 1,874 more rows]
