# Supplementary material for: Analyzing moisture-heat coupling in a wheat-soil system using data-driven vector autoregression model
Source: PeerJ. 2019 Jun 11;7:e7101. doi: 10.7717/peerj.7101 (PMC6568251; doi:10.7717/peerj.7101)
Supplement: Supplemental Information 2 — These data are raw data used during the testing stage for verifying the conclusions obtained from the vector autoregression model, impulse response functions, and Granger causality tests. [file peerj-07-7101-s002.xlsx]

## Sheet: 工作表1
Time		10cm		30cm		90cm																	10cm		30cm		90cm
		soil moisture	soil temperature	soil moisture	soil temperature	soil moisture	soil temperature																soil moisture	soil temperature	soil moisture	soil temperature	soil moisture	soil temperature
2016-12-19 00:02:43		0.375	-4.075	-0.72	-0.044	0.3	-0.375																-0.694	-2.85	-0.72	-0.044	0.3	-0.375
2016-12-19 01:02:47		0.375	-3.839	-0.67	-0.05	0.29	-0.313																-0.6	-2.738	-0.67	-0.05	0.29	-0.313
2016-12-19 02:02:50		0.188	-3.647	-0.63	-0.044	0.3	-0.313																-0.506	-2.55	-0.63	-0.044	0.3	-0.313
2016-12-19 03:02:44		0.094	-3.47	-0.59	-0.044	0.27	-0.25																-0.413	-2.475	-0.59	-0.044	0.27	-0.25
2016-12-19 04:02:45		0	-3.337	-0.57	-0.038	0.27	-0.25																-0.319	-2.363	-0.57	-0.038	0.27	-0.25
2016-12-19 05:02:44		0.094	-3.293	-0.54	-0.044	0.27	-0.25																-0.319	-2.25	-0.54	-0.044	0.27	-0.25
2016-12-19 06:02:44		0.188	-3.086	-0.53	-0.038	0.29	-0.313																-0.225	-2.175	-0.53	-0.038	0.29	-0.313
2016-12-19 07:02:46		0.188	-2.835	-0.5	-0.031	0.28	-0.25																-0.225	-2.1	-0.5	-0.031	0.28	-0.25
2016-12-19 08:02:50		0.375	-2.377	-0.47	-0.031	0.28	-0.25																-0.225	-1.988	-0.47	-0.031	0.28	-0.25
2016-12-19 09:02:41		0	-1.772	-0.45	-0.031	0.28	-0.25																-0.131	-2.025	-0.45	-0.031	0.28	-0.25
2016-12-19 10:04:03		0.094	-1.491	-0.41	-0.038	0.28	-0.313																-0.131	-1.95	-0.41	-0.038	0.28	-0.313
2016-12-19 11:02:35		0.188	-1.27	-0.39	-0.031	0.29	-0.313																-0.038	-1.913	-0.39	-0.031	0.29	-0.313
2016-12-19 12:04:18		0.375	-0.842	-0.38	-0.031	0.29	-0.313																-0.131	-1.875	-0.38	-0.031	0.29	-0.313
2016-12-19 13:03:27		3	-0.605	-0.38	-0.031	0.29	-0.313																0.056	-1.8	-0.38	-0.031	0.29	-0.313
2016-12-19 14:02:55		3.188	-0.827	-0.36	-0.025	0.27	-0.313																0.525	-1.613	-0.36	-0.025	0.27	-0.313
2016-12-19 15:02:47		3.938	-1.58	-0.36	-0.019	0.25	-0.25																0.806	-1.425	-0.36	-0.019	0.25	-0.25
2016-12-19 16:02:45		3.75	-1.639	-0.35	-0.019	0.26	-0.25																1.088	-1.2	-0.35	-0.019	0.26	-0.25
2016-12-19 17:02:53		3	-1.609	-0.33	-0.019	0.24	-0.188																1.181	-1.125	-0.33	-0.019	0.24	-0.188
2016-12-19 18:03:59		2.063	-1.668	-0.32	-0.019	0.25	-0.25																1.181	-1.163	-0.32	-0.019	0.25	-0.25
2016-12-19 19:04:54		1.313	-1.742	-0.31	-0.013	0.22	-0.188																1.088	-1.275	-0.31	-0.013	0.22	-0.188
2016-12-19 20:02:57		0.844	-1.713	-0.3	-0.006	0.23	-0.25																0.994	-1.275	-0.3	-0.006	0.23	-0.25
2016-12-19 21:02:45		0.094	-1.742	-0.28	-0.013	0.23	-0.25																0.9	-1.313	-0.28	-0.013	0.23	-0.25
2016-12-19 22:02:46		-0.281	-1.757	-0.29	0	0.2	-0.188																0.713	-1.35	-0.29	0	0.2	-0.188
2016-12-19 23:02:45		-0.656	-1.787	-0.27	-0.006	0.21	-0.188																0.619	-1.388	-0.27	-0.006	0.21	-0.188
2016-12-20 00:02:46		-0.75	-1.846	-0.26	-0.006	0.21	-0.188																0.525	-1.388	-0.26	-0.006	0.21	-0.188
2016-12-20 01:02:43		-0.844	-2.008	-0.25	0	0.21	-0.188																0.431	-1.35	-0.25	0	0.21	-0.188
2016-12-20 02:02:51		-0.656	-2.215	-0.25	0.006	0.19	-0.188																0.338	-1.388	-0.25	0.006	0.19	-0.188
2016-12-20 03:02:43		-0.469	-2.481	-0.24	0	0.2	-0.188																0.338	-1.313	-0.24	0	0.2	-0.188
2016-12-20 04:02:46		0.375	-2.599	-0.22	0	0.22	-0.188																0.244	-1.238	-0.22	0	0.22	-0.188
2016-12-20 05:02:46		0.563	-2.333	-0.23	0.006	0.2	-0.188																0.244	-1.2	-0.23	0.006	0.2	-0.188
2016-12-20 06:02:46		0.656	-1.919	-0.22	0	0.19	-0.188																0.15	-1.163	-0.22	0	0.19	-0.188
2016-12-20 07:02:49		0.938	-1.196	-0.22	0	0.19	-0.188																0.338	-1.125	-0.22	0	0.19	-0.188
2016-12-20 08:02:52		0.656	-0.192	-0.21	0	0.21	-0.188																0.431	-1.125	-0.21	0	0.21	-0.188
2016-12-20 09:02:46		0.469	0.354	-0.21	0	0.19	-0.188																0.338	-1.05	-0.21	0	0.19	-0.188
2016-12-20 10:03:54		0.375	0.517	-0.21	0	0.19	-0.188																0.338	-1.013	-0.21	0	0.19	-0.188
2016-12-20 11:03:08		0.375	0.723	-0.2	0	0.18	-0.188																0.244	-1.013	-0.2	0	0.18	-0.188
2016-12-20 12:03:15		2.344	0.901	-0.2	-0.006	0.18	-0.188																0.431	-1.013	-0.2	-0.006	0.18	-0.188
2016-12-20 13:03:05		2.719	0.502	-0.2	0	0.18	-0.25																0.713	-0.9	-0.2	0	0.18	-0.25
2016-12-20 14:03:23		2.813	-0.679	-0.19	0	0.18	-0.188																0.994	-0.75	-0.19	0	0.18	-0.188
2016-12-20 15:03:27		2.063	-0.871	-0.19	0	0.18	-0.188																0.994	-0.675	-0.19	0	0.18	-0.188
2016-12-20 16:02:47		1.781	-0.901	-0.18	0	0.16	-0.188																0.994	-0.75	-0.18	0	0.16	-0.188
2016-12-20 17:02:46		1.969	-0.871	-0.18	0	0.18	-0.188																0.994	-0.75	-0.18	0	0.18	-0.188
2016-12-20 18:02:42		2.531	-0.842	-0.19	0.006	0.17	-0.25																1.088	-0.675	-0.19	0.006	0.17	-0.25
2016-12-20 19:02:45		3.188	-0.783	-0.17	0.006	0.19	-0.188																1.275	-0.525	-0.17	0.006	0.19	-0.188
2016-12-20 20:02:55		3.563	-0.768	-0.17	0.006	0.17	-0.125																1.369	-0.45	-0.17	0.006	0.17	-0.125
2016-12-20 21:02:44		4.5	-0.635	-0.16	0.013	0.17	-0.125																1.556	-0.375	-0.16	0.013	0.17	-0.125
2016-12-20 22:02:45		4.875	-0.517	-0.14	0.006	0.17	-0.125																1.744	-0.188	-0.14	0.006	0.17	-0.125
2016-12-20 23:02:44		5.063	-0.413	-0.14	0.013	0.16	-0.188																2.025	-0.15	-0.14	0.013	0.16	-0.188
2016-12-21 00:02:45		4.969	-0.266	-0.13	0.019	0.17	-0.188																2.119	-0.075	-0.13	0.019	0.17	-0.188
2016-12-21 01:02:46		5.063	0.015	-0.13	0.025	0.17	-0.188																2.213	-0.038	-0.13	0.025	0.17	-0.188
2016-12-21 02:02:50		4.969	0.443	-0.12	0.019	0.18	-0.188																2.4	0	-0.12	0.019	0.18	-0.188
2016-12-21 03:02:42		4.781	1.063	-0.11	0.025	0.16	-0.188																2.4	0	-0.11	0.025	0.16	-0.188
2016-12-21 04:02:46		3.563	1.713	-0.12	0.031	0.14	-0.188																2.4	-0.038	-0.12	0.031	0.14	-0.188
2016-12-21 05:02:46		2.625	2.215	-0.1	0.031	0.15	-0.125																2.4	-0.15	-0.1	0.031	0.15	-0.125
2016-12-21 06:02:46		1.875	2.717	-0.1	0.038	0.14	-0.125																2.306	-0.225	-0.1	0.038	0.14	-0.125
2016-12-21 07:02:47		1.313	3.012	-0.09	0.038	0.14	-0.188																2.025	-0.263	-0.09	0.038	0.14	-0.188
2016-12-21 08:02:48		1.125	3.042	-0.1	0.044	0.12	-0.188																1.838	-0.338	-0.1	0.044	0.12	-0.188
2016-12-21 09:02:43		1.406	2.909	-0.08	0.044	0.14	-0.188																1.744	-0.375	-0.08	0.044	0.14	-0.188
2016-12-21 10:02:47		2.25	2.702	-0.08	0.05	0.14	-0.188																1.65	-0.413	-0.08	0.05	0.14	-0.188
2016-12-21 11:02:43		3.563	1.919	-0.08	0.044	0.13	-0.188																1.838	-0.413	-0.08	0.044	0.13	-0.188
2016-12-21 12:04:07		2.813	0.399	-0.07	0.05	0.13	-0.188																2.025	-0.375	-0.07	0.05	0.13	-0.188
2016-12-21 13:03:26		1.406	-0.856	-0.06	0.044	0.12	-0.125																2.025	-0.413	-0.06	0.044	0.12	-0.125
2016-12-21 14:03:18		1.219	-0.827	-0.08	0.044	0.12	-0.125																1.744	-0.413	-0.08	0.044	0.12	-0.125
2016-12-21 15:03:02		1.406	-0.753	-0.07	0.044	0.13	-0.188																1.65	-0.488	-0.07	0.044	0.13	-0.188
2016-12-21 16:03:01		1.313	-0.709	-0.07	0.05	0.13	-0.125																1.556	-0.525	-0.07	0.05	0.13	-0.125
2016-12-21 17:02:47		1.031	-0.709	-0.07	0.05	0.12	-0.125																1.463	-0.563	-0.07	0.05	0.12	-0.125
2016-12-21 18:03:14		0.844	-0.679	-0.05	0.05	0.12	-0.063																1.369	-0.525	-0.05	0.05	0.12	-0.063
2016-12-21 19:02:45		0.563	-0.664	-0.06	0.05	0.12	-0.125																1.275	-0.563	-0.06	0.05	0.12	-0.125
2016-12-21 20:02:50		0.656	-0.635	-0.06	0.05	0.13	-0.188																1.181	-0.525	-0.06	0.05	0.13	-0.188
2016-12-21 21:02:43		0.656	-0.62	-0.06	0.05	0.12	-0.188																1.088	-0.525	-0.06	0.05	0.12	-0.188
2016-12-21 22:02:43		0.938	-0.576	-0.05	0.05	0.13	-0.188																1.088	-0.563	-0.05	0.05	0.13	-0.188
2016-12-21 23:02:44		1.219	-0.502	-0.05	0.05	0.13	-0.125																1.088	-0.488	-0.05	0.05	0.13	-0.125
2016-12-22 00:02:51		1.5	-0.443	-0.06	0.05	0.12	-0.125																1.181	-0.488	-0.06	0.05	0.12	-0.125
2016-12-22 01:02:43		1.688	-0.413	-0.06	0.044	0.12	-0.125																1.275	-0.375	-0.06	0.044	0.12	-0.125
2016-12-22 02:02:47		1.875	-0.399	-0.06	0.05	0.12	-0.125																1.275	-0.338	-0.06	0.05	0.12	-0.125
2016-12-22 03:02:46		2.156	-0.369	-0.06	0.05	0.13	-0.125																1.369	-0.3	-0.06	0.05	0.13	-0.125
2016-12-22 04:02:43		2.813	-0.281	-0.05	0.044	0.13	-0.125																1.556	-0.263	-0.05	0.044	0.13	-0.125
2016-12-22 05:02:49		3.75	-0.192	-0.06	0.05	0.13	-0.125																1.65	-0.15	-0.06	0.05	0.13	-0.125
2016-12-22 06:02:44		4.219	-0.133	-0.04	0.05	0.13	-0.125																1.838	-0.038	-0.04	0.05	0.13	-0.125
2016-12-22 07:02:45		4.688	0	-0.04	0.05	0.12	-0.063																2.119	0.038	-0.04	0.05	0.12	-0.063
2016-12-22 08:03:45		4.875	0.177	-0.03	0.05	0.13	-0.063																2.306	0.075	-0.03	0.05	0.13	-0.063
2016-12-22 09:02:44		4.5	0.177	-0.03	0.05	0.11	-0.063																2.4	0.15	-0.03	0.05	0.11	-0.063
2016-12-22 10:02:44		3.938	-0.074	-0.02	0.05	0.11	-0.063																2.494	0.188	-0.02	0.05	0.11	-0.063
2016-12-22 11:02:52		3.281	-0.251	-0.03	0.056	0.11	-0.063																2.494	0.113	-0.03	0.056	0.11	-0.063
2016-12-22 12:02:42		2.906	-0.31	-0.03	0.063	0.11	-0.063																2.494	0.038	-0.03	0.063	0.11	-0.063
2016-12-22 13:02:44		1.594	-0.532	-0.01	0.063	0.11	-0.063																2.306	0	-0.01	0.063	0.11	-0.063
2016-12-22 14:02:58		-0.563	-0.783	-0.01	0.069	0.1	-0.063																2.025	-0.3	-0.01	0.069	0.1	-0.063
2016-12-22 15:02:46		-1.594	-0.842	0	0.069	0.09	0																1.65	-0.45	0	0.069	0.09	0
2016-12-22 16:04:26		-1.688	-0.856	0	0.069	0.1	-0.063																1.181	-0.563	0	0.069	0.1	-0.063
2016-12-22 17:02:45		-0.938	-0.723	0	0.069	0.11	-0.063																0.994	-0.563	0	0.069	0.11	-0.063
2016-12-22 18:02:48		-0.281	-0.65	0	0.069	0.1	-0.063																0.9	-0.563	0	0.069	0.1	-0.063
2016-12-22 19:02:51		-0.188	-0.679	0	0.063	0.1	-0.063																0.806	-0.563	0	0.063	0.1	-0.063
2016-12-22 20:02:51		-0.469	-0.723	-0.01	0.063	0.09	0																0.806	-0.6	-0.01	0.063	0.09	0
2016-12-22 21:02:45		-0.469	-0.709	-0.02	0.063	0.1	0																0.806	-0.563	-0.02	0.063	0.1	0
2016-12-22 22:02:46		-0.75	-0.723	-0.02	0.056	0.1	-0.063																0.619	-0.563	-0.02	0.056	0.1	-0.063
2016-12-22 23:02:45		-0.938	-0.768	-0.01	0.056	0.1	0																0.525	-0.6	-0.01	0.056	0.1	0
2016-12-23 00:02:45		-2.063	-0.886	-0.01	0.05	0.09	0																0.431	-0.675	-0.01	0.05	0.09	0
2016-12-23 01:02:45		-3	-0.974	-0.01	0.05	0.09	0																0.15	-0.825	-0.01	0.05	0.09	0
2016-12-23 02:02:49		-3.656	-1.019	-0.01	0.044	0.09	0																-0.038	-0.9	-0.01	0.044	0.09	0
2016-12-23 03:02:46		-4.031	-1.078	-0.02	0.044	0.09	0																-0.319	-0.975	-0.02	0.044	0.09	0
2016-12-23 04:02:42		-6.9	-1.152	-0.02	0.044	0.09	0																-0.694	-1.013	-0.02	0.044	0.09	0
2016-12-23 05:02:42		-7.619	-1.24	-0.02	0.038	0.08	0																-0.881	-1.125	-0.02	0.038	0.08	0
2016-12-23 06:02:45		-7.475	-1.417	-0.04	0.031	0.09	0																-1.163	-1.2	-0.04	0.031	0.09	0
2016-12-23 07:02:45		-7.619	-1.609	-0.05	0.031	0.11	0																-1.444	-1.238	-0.05	0.031	0.11	0
2016-12-23 08:02:49		-7.619	-1.846	-0.06	0.025	0.1	0																-1.631	-1.275	-0.06	0.025	0.1	0
2016-12-23 09:02:47		-7.188	-1.772	-0.06	0.019	0.11	0																-1.631	-1.313	-0.06	0.019	0.11	0
2016-12-23 10:02:42		-6.181	-1.225	-0.07	0.019	0.11	0																-1.819	-1.313	-0.07	0.019	0.11	0
2016-12-23 11:04:07		-2.875	-0.768	-0.06	0.013	0.11	0																-1.725	-1.163	-0.06	0.013	0.11	0
2016-12-23 12:04:29		-0.144	-0.576	-0.07	0	0.11	0																-1.538	-0.975	-0.07	0	0.11	0
2016-12-23 13:05:06		2.013	-0.428	-0.1	0.006	0.12	0																-1.163	-0.825	-0.1	0.006	0.12	0
2016-12-23 14:05:46		3.306	-0.325	-0.07	-0.006	0.12	0																-0.694	-0.638	-0.07	-0.006	0.12	0
2016-12-23 15:04:07		3.594	-0.369	-0.08	-0.006	0.12	0																-0.319	-0.563	-0.08	-0.006	0.12	0
2016-12-23 16:03:24		3.163	-0.399	-0.08	-0.013	0.11	0																-0.038	-0.488	-0.08	-0.013	0.11	0
2016-12-23 17:02:46		1.438	-0.532	-0.09	-0.006	0.11	0																0.056	-0.488	-0.09	-0.006	0.11	0
2016-12-23 18:02:46		-0.575	-0.664	-0.09	-0.013	0.12	0																-0.038	-0.563	-0.09	-0.013	0.12	0
2016-12-23 19:04:31		-1.581	-0.753	-0.1	-0.006	0.1	0																-0.413	-0.638	-0.1	-0.006	0.1	0
2016-12-23 20:02:57		-2.588	-0.797	-0.09	-0.013	0.11	0																-0.881	-0.675	-0.09	-0.013	0.11	0
2016-12-23 21:02:45		-4.313	-0.915	-0.09	-0.013	0.1	0																-1.256	-0.75	-0.09	-0.013	0.1	0
2016-12-23 22:02:44		-5.463	-0.989	-0.11	-0.006	0.09	0.063																-1.256	-0.938	-0.11	-0.006	0.09	0.063
2016-12-23 23:02:43		-6.181	-1.093	-0.12	-0.013	0.1	0																-1.538	-1.05	-0.12	-0.013	0.1	0
2016-12-24 00:02:44		-5.175	-1.196	-0.12	-0.013	0.1	0																-1.819	-1.05	-0.12	-0.013	0.1	0
2016-12-24 01:02:45		-4.169	-1.417	-0.14	-0.013	0.11	0																-1.913	-1.05	-0.14	-0.013	0.11	0
2016-12-24 02:02:47		-3.45	-1.742	-0.15	-0.013	0.1	0																-2.006	-1.05	-0.15	-0.013	0.1	0
2016-12-24 03:02:44		-3.163	-2.111	-0.15	-0.019	0.09	0.063																-1.913	-1.088	-0.15	-0.019	0.09	0.063
2016-12-24 04:02:44		-2.731	-2.554	-0.16	-0.025	0.11	0																-1.725	-1.05	-0.16	-0.025	0.11	0
2016-12-24 05:02:44		-1.869	-2.997	-0.16	-0.025	0.1	0.063																-1.725	-0.975	-0.16	-0.025	0.1	0.063
2016-12-24 06:02:47		-1.869	-3.322	-0.16	-0.025	0.1	0																-1.631	-0.938	-0.16	-0.025	0.1	0
2016-12-24 07:02:44		-1.869	-3.736	-0.16	-0.031	0.08	0																-1.538	-0.938	-0.16	-0.031	0.08	0
2016-12-24 08:02:49		-2.156	-4.178	-0.16	-0.031	0.08	0																-1.256	-0.975	-0.16	-0.031	0.08	0
2016-12-24 09:02:42		-2.444	-4.37	-0.16	-0.031	0.09	0																-1.163	-1.013	-0.16	-0.031	0.09	0
2016-12-24 10:02:48		-2.444	-2.599	-0.16	-0.038	0.09	0																-1.069	-0.938	-0.16	-0.038	0.09	0
2016-12-24 11:02:45		-3.163	-1.285	-0.16	-0.038	0.1	0																-1.163	-0.938	-0.16	-0.038	0.1	0
2016-12-24 12:02:49		-2.588	-0.768	-0.14	-0.038	0.09	0.063																-1.256	-1.013	-0.14	-0.038	0.09	0.063
2016-12-24 13:02:51		-2.156	-0.738	-0.14	-0.038	0.1	0																-1.069	-0.938	-0.14	-0.038	0.1	0
2016-12-24 14:03:01		-2.588	-0.812	-0.15	-0.038	0.08	0.063																-1.069	-0.863	-0.15	-0.038	0.08	0.063
2016-12-24 15:02:45		-5.463	-1.122	-0.15	-0.038	0.08	0.063																-0.694	-0.825	-0.15	-0.038	0.08	0.063
2016-12-24 16:04:01		-8.338	-1.314	-0.15	-0.038	0.07	0.063																-1.069	-1.013	-0.15	-0.038	0.07	0.063
2016-12-24 17:02:37		-8.481	-1.329	-0.14	-0.038	0.07	0.063																-1.538	-1.2	-0.14	-0.038	0.07	0.063
2016-12-24 18:02:48		-6.038	-1.181	-0.14	-0.038	0.08	0.063																-1.725	-1.2	-0.14	-0.038	0.08	0.063
2016-12-24 19:03:13		-3.594	-0.974	-0.13	-0.038	0.1	0.063																-1.444	-1.125	-0.13	-0.038	0.1	0.063
2016-12-24 20:02:49		-1.006	-0.797	-0.13	-0.031	0.09	0.063																-0.975	-0.975	-0.13	-0.031	0.09	0.063
2016-12-24 21:02:48		-0.144	-0.768	-0.13	-0.038	0.1	0																-0.6	-0.938	-0.13	-0.038	0.1	0
2016-12-24 22:02:45		0.288	-0.753	-0.12	-0.044	0.1	0																-0.694	-0.75	-0.12	-0.044	0.1	0
2016-12-24 23:02:46		0	-0.723	-0.11	-0.044	0.08	0																-0.694	-0.675	-0.11	-0.044	0.08	0
2016-12-25 00:02:45		-0.144	-0.635	-0.11	-0.044	0.08	0.063																-0.506	-0.713	-0.11	-0.044	0.08	0.063
2016-12-25 01:02:45		-1.006	-0.487	-0.1	-0.044	0.07	0.063																-0.131	-0.713	-0.1	-0.044	0.07	0.063
2016-12-25 02:02:49		-1.006	-0.413	-0.09	-0.044	0.07	0.063																-0.038	-0.675	-0.09	-0.044	0.07	0.063
2016-12-25 03:02:47		-0.719	-0.354	-0.09	-0.038	0.1	-0.063																-0.038	-0.6	-0.09	-0.038	0.1	-0.063
2016-12-25 04:02:43		-0.863	-0.281	-0.08	-0.038	0.08	0																-0.038	-0.638	-0.08	-0.038	0.08	0
2016-12-25 05:02:46		-1.006	-0.221	-0.08	-0.038	0.1	-0.063																0.056	-0.6	-0.08	-0.038	0.1	-0.063
2016-12-25 06:02:48		-0.575	-0.162	-0.08	-0.038	0.09	0																0.15	-0.6	-0.08	-0.038	0.09	0
2016-12-25 07:02:44		0.863	0.443	-0.06	-0.038	0.09	0																0.15	-0.525	-0.06	-0.038	0.09	0
2016-12-25 08:02:49		1.869	1.728	-0.06	-0.031	0.09	0.063																0.15	-0.338	-0.06	-0.031	0.09	0.063
2016-12-25 09:02:48		3.306	2.983	-0.06	-0.031	0.08	0.063																0.056	-0.225	-0.06	-0.031	0.08	0.063
2016-12-25 11:02:49		6.613	1.624	-0.05	-0.031	0.08	0																0.338	-0.15	-0.05	-0.031	0.08	0
2016-12-25 12:03:12		6.756	0.089	-0.06	-0.025	0.07	0																0.9	-0.038	-0.06	-0.025	0.07	0
2016-12-25 13:02:45		4.313	-0.591	-0.06	-0.025	0.08	-0.063																1.181	0.075	-0.06	-0.025	0.08	-0.063
2016-12-25 14:02:51		1.869	-0.738	-0.05	-0.025	0.05	0																1.088	-0.188	-0.05	-0.025	0.05	0
2016-12-25 15:02:45		-0.144	-0.901	-0.05	-0.019	0.07	-0.063																0.9	-0.15	-0.05	-0.019	0.07	-0.063
2016-12-25 17:02:45		-0.431	-0.797	-0.05	-0.019	0.07	-0.063																0.15	-0.375	-0.05	-0.019	0.07	-0.063
2016-12-25 18:02:44		-3.306	-1.004	-0.04	-0.013	0.06	-0.063																-0.038	-0.525	-0.04	-0.013	0.06	-0.063
2016-12-25 19:02:45		-3.019	-0.93	-0.04	-0.013	0.07	-0.063																-0.225	-0.488	-0.04	-0.013	0.07	-0.063
2016-12-25 20:03:12		-3.738	-0.915	-0.05	-0.006	0.06	-0.063																-0.319	-0.563	-0.05	-0.006	0.06	-0.063
2016-12-25 21:02:45		-4.888	-0.945	-0.05	-0.006	0.05	-0.063																-0.506	-0.6	-0.05	-0.006	0.05	-0.063
2016-12-25 22:02:44		-6.181	-1.048	-0.05	-0.013	0.06	-0.063																-0.694	-0.713	-0.05	-0.013	0.06	-0.063
2016-12-25 23:02:45		-5.463	-1.137	-0.05	-0.013	0.04	0																-0.975	-0.713	-0.05	-0.013	0.04	0
2016-12-26 00:02:45		-4.6	-1.344	-0.06	-0.013	0.05	0																-0.881	-0.788	-0.06	-0.013	0.05	0
2016-12-26 01:02:45		-3.738	-1.595	-0.06	-0.019	0.06	0																-0.694	-0.788	-0.06	-0.019	0.06	0
2016-12-26 02:02:48		-2.875	-1.89	-0.07	-0.019	0.06	-0.063																-0.694	-0.675	-0.07	-0.019	0.06	-0.063
2016-12-26 03:02:44		-0.575	-2.097	-0.06	-0.019	0.06	-0.063																-0.881	-0.563	-0.06	-0.019	0.06	-0.063
2016-12-26 04:02:48		-0.144	-1.949	-0.07	-0.025	0.07	-0.125																-0.788	-0.525	-0.07	-0.025	0.07	-0.125
2016-12-26 05:02:45		0.144	-1.742	-0.07	-0.025	0.05	0																-0.694	-1.875	-0.07	-0.025	0.05	0
2016-12-26 06:02:45		0.288	-1.477	-0.08	-0.025	0.06	-0.063																-0.694	-0.45	-0.08	-0.025	0.06	-0.063
2016-12-26 07:02:45		0.575	-1.211	-0.07	-0.031	0.04	0																-0.6	-0.413	-0.07	-0.031	0.04	0
2016-12-26 08:03:21		0.863	-0.635	-0.07	-0.025	0.06	-0.063																-0.413	-0.413	-0.07	-0.025	0.06	-0.063
2016-12-26 09:02:46		0.431	-0.015	-0.07	-0.025	0.04	0																-0.225	-0.413	-0.07	-0.025	0.04	0
2016-12-26 10:03:05		0.863	0.546	-0.06	-0.031	0.06	-0.063																-0.319	-0.413	-0.06	-0.031	0.06	-0.063
2016-12-26 11:03:20		3.881	0.517	-0.06	-0.025	0.06	-0.125																-0.038	-0.338	-0.06	-0.025	0.06	-0.125
2016-12-26 12:02:43		3.019	-0.177	-0.08	-0.025	0.06	-0.063																0.338	-0.225	-0.08	-0.025	0.06	-0.063
2016-12-26 13:03:00		0.719	-0.399	-0.07	-0.025	0.03	0																0.338	-0.263	-0.07	-0.025	0.03	0
2016-12-26 14:02:53		-1.15	-0.532	-0.07	-0.019	0.03	-0.063																0.338	-0.338	-0.07	-0.019	0.03	-0.063
2016-12-26 15:04:12		-1.725	-0.605	-0.07	-0.019	0.05	-0.063																0.15	-0.413	-0.07	-0.019	0.05	-0.063
2016-12-26 16:03:26		-2.731	-0.62	-0.07	-0.019	0.04	-0.063																-0.038	-0.488	-0.07	-0.019	0.04	-0.063
2016-12-26 17:02:44		-2.156	-0.576	-0.07	-0.019	0.03	-0.063																-0.225	-0.488	-0.07	-0.019	0.03	-0.063
2016-12-26 19:03:14		2.731	-0.207	-0.07	-0.019	0.05	-0.063																-0.131	-0.338	-0.07	-0.019	0.05	-0.063
2016-12-26 20:02:52		3.881	-0.162	-0.07	-0.019	0.04	-0.063																0.15	-0.263	-0.07	-0.019	0.04	-0.063
2016-12-26 21:02:50		5.031	-0.103	-0.06	-0.025	0.05	-0.063																0.338	-0.113	-0.06	-0.025	0.05	-0.063
2016-12-26 22:02:46		6.038	-0.089	-0.06	-0.025	0.05	-0.063																0.619	0	-0.06	-0.025	0.05	-0.063
2016-12-26 23:02:49		6.325	-0.059	-0.05	-0.025	0.04	-0.063																0.806	0.075	-0.05	-0.025	0.04	-0.063
2016-12-27 00:02:46		5.894	0.089	-0.05	-0.019	0.05	-0.063																1.088	0.113	-0.05	-0.019	0.05	-0.063
2016-12-27 01:02:50		5.463	0.325	-0.04	-0.019	0.04	-0.063																1.275	0.375	-0.04	-0.019	0.04	-0.063
2016-12-27 02:02:47		5.319	0.65	-0.04	-0.006	0.04	-0.063																1.275	0.225	-0.04	-0.006	0.04	-0.063
2016-12-27 03:02:43		4.744	1.034	-0.03	-0.006	0.04	-0.063																1.369	0.188	-0.03	-0.006	0.04	-0.063
2016-12-27 04:02:43		4.025	1.432	-0.03	-0.006	0.06	-0.125																1.463	0.113	-0.03	-0.006	0.06	-0.125
2016-12-27 05:02:44		4.6	1.654	-0.02	0	0.04	0																1.556	0.15	-0.02	0	0.04	0
2016-12-27 06:02:46		4.888	1.86	-0.01	0	0.04	-0.063																1.556	0.188	-0.01	0	0.04	-0.063
2016-12-27 07:02:44		5.319	2.067	-0.01	0.006	0.03	0																1.744	0.225	-0.01	0.006	0.03	0
2016-12-27 08:02:49		5.606	2.318	-0.01	0.013	0.05	-0.063																1.744	0.3	-0.01	0.013	0.05	-0.063
2016-12-27 09:02:41		5.75	2.274	0	0.013	0.03	0																1.838	0.263	0	0.013	0.03	0
2016-12-27 10:02:51		6.756	1.801	-0.01	0.013	0.06	-0.125																1.838	0.338	-0.01	0.013	0.06	-0.125
2016-12-27 11:02:54		8.481	0.597	-0.01	0.019	0.04	-0.125																2.119	1.875	-0.01	0.019	0.04	-0.125
2016-12-27 12:03:20		7.188	0	-0.01	0.019	0.04	-0.063																2.4	1.95	-0.01	0.019	0.04	-0.063
2016-12-27 13:02:50		6.325	-0.061	0.01	0.025	0.03	-0.063																2.4	0.45	0.01	0.025	0.03	-0.063
2016-12-27 14:03:37		6.756	-0.041	0.01	0.025	0.06	-0.125																2.494	1.875	0.01	0.025	0.06	-0.125
2016-12-27 15:02:42		6.756	-0.051	0.01	0.025	0.05	-0.063																2.494	0.563	0.01	0.025	0.05	-0.063
2016-12-27 16:02:52		5.319	-0.132	0.02	0.031	0.04	-0.063																2.494	0.563	0.02	0.031	0.04	-0.063
2016-12-27 17:02:42		4.456	-0.182	0.02	0.038	0.04	-0.063																2.4	0.45	0.02	0.038	0.04	-0.063
2016-12-27 18:02:45		2.875	-0.253	0.02	0.044	0.03	-0.063																2.306	1.875	0.02	0.044	0.03	-0.063
2016-12-27 19:02:45		1.438	-0.324	0.02	0.044	0.03	-0.063																2.119	0.3	0.02	0.044	0.03	-0.063
2016-12-27 20:02:50		1.006	-0.334	0.03	0.044	0.04	-0.063																1.931	0.188	0.03	0.044	0.04	-0.063
2016-12-27 21:02:41		0.431	-0.365	0.04	0.05	0.04	-0.063																1.744	0.075	0.04	0.05	0.04	-0.063
2016-12-27 22:02:42		-0.288	-0.365	0.04	0.05	0.03	-0.063																1.463	0	0.04	0.05	0.03	-0.063
2016-12-27 23:02:45		-0.431	-0.354	0.02	0.056	0.04	-0.125																1.369	-0.075	0.02	0.056	0.04	-0.125
2016-12-28 00:02:46		-0.863	-0.365	0.03	0.05	0.03	-0.063																1.181	-0.113	0.03	0.05	0.03	-0.063
2016-12-28 01:02:45		-1.006	-0.365	0.04	0.05	0.04	-0.063																0.994	-0.15	0.04	0.05	0.04	-0.063
2016-12-28 02:02:53		-1.15	-0.365	0.03	0.044	0.05	-0.125																0.9	-0.188	0.03	0.044	0.05	-0.125
2016-12-28 03:02:42		-1.581	-0.365	0.02	0.044	0.04	-0.125																0.713	-0.225	0.02	0.044	0.04	-0.125
2016-12-28 04:02:46		-2.444	-0.415	0.02	0.044	0.02	-0.063																0.619	-0.225	0.02	0.044	0.02	-0.063
2016-12-28 05:02:42		-3.594	-0.456	0	0.044	0.04	-0.125																0.338	-0.263	0	0.044	0.04	-0.125
2016-12-28 06:02:45		-4.313	-0.496	0.01	0.038	0.04	-0.125																0.244	-1.875	0.01	0.038	0.04	-0.125
2016-12-28 07:02:46		-4.744	-0.618	0	0.038	0.04	-0.125																-0.038	-0.488	0	0.038	0.04	-0.125
2016-12-28 08:03:04		-5.031	-0.8	0	0.031	0.04	-0.125																-0.225	-0.563	0	0.031	0.04	-0.125
2016-12-28 09:02:46		-4.744	-0.851	-0.01	0.031	0.05	-0.125																-0.506	-1.988	-0.01	0.031	0.05	-0.125
2016-12-28 10:02:47		-5.606	-0.689	0	0.031	0.03	-0.063																-0.6	-0.6	0	0.031	0.03	-0.063
2016-12-28 11:02:46		-4.888	-0.506	0	0.025	0.03	-0.063																-0.694	-0.675	0	0.025	0.03	-0.063
2016-12-28 12:02:44		-4.169	-0.425	-0.01	0.025	0.04	-0.063																-0.881	-0.675	-0.01	0.025	0.04	-0.063
2016-12-28 13:02:44		-4.025	-0.415	-0.02	0.019	0.04	-0.063																-0.881	-0.675	-0.02	0.019	0.04	-0.063
2016-12-28 14:02:51		-3.881	-0.395	-0.02	0.019	0.03	-0.063																-0.881	-0.713	-0.02	0.019	0.03	-0.063
2016-12-28 16:02:57		-3.594	-0.375	-0.03	0.013	0.03	-0.063																-0.881	-0.713	-0.03	0.013	0.03	-0.063
2016-12-28 16:02:57		-3.738	-0.375	-0.04	0.006	0.03	-0.063																-0.881	-0.713	-0.04	0.006	0.03	-0.063
2016-12-28 17:02:50		-3.163	-0.344	-0.03	0	0.04	-0.063																-0.975	-0.638	-0.03	0	0.04	-0.063
2016-12-28 18:02:45		-2.013	-0.263	-0.03	0	0.04	-0.063																-0.881	-0.638	-0.03	0	0.04	-0.063
2016-12-28 19:02:51		-0.719	-0.192	-0.04	-0.006	0.04	-0.063																-0.788	-0.525	-0.04	-0.006	0.04	-0.063
2016-12-28 20:02:50		-0.144	-0.172	-0.04	0	0.04	-0.063																-0.694	-0.45	-0.04	0	0.04	-0.063
2016-12-28 21:02:43		0.719	-0.122	-0.06	-0.006	0.04	-0.063																-0.506	-0.375	-0.06	-0.006	0.04	-0.063
2016-12-28 22:02:44		2.013	-0.071	-0.05	-0.006	0.05	-0.063																-0.225	-0.3	-0.05	-0.006	0.05	-0.063
2016-12-28 23:02:43		2.875	-0.041	-0.04	-0.013	0.04	0																-0.038	-0.225	-0.04	-0.013	0.04	0
2016-12-29 00:02:45		3.738	0	-0.05	-0.006	0.05	-0.063																0.244	-0.15	-0.05	-0.006	0.05	-0.063
2016-12-29 01:02:44		4.025	0	-0.05	-0.006	0.04	-0.063																0.431	-0.038	-0.05	-0.006	0.04	-0.063
2016-12-29 02:02:54		4.313	0.02	-0.04	0	0.03	0																0.619	0	-0.04	0	0.03	0
2016-12-29 03:02:44		5.319	0.051	-0.03	0	0.05	0																0.9	0.075	-0.03	0	0.05	0
2016-12-29 04:02:44		6.038	0.091	-0.03	0	0.04	0																1.088	0.15	-0.03	0	0.04	0
2016-12-29 05:02:44		6.469	0.111	-0.01	0	0.04	0																1.275	0.188	-0.01	0	0.04	0
2016-12-29 06:02:44		6.613	0.132	-0.02	0.006	0.04	0																1.463	0.263	-0.02	0.006	0.04	0
2016-12-29 07:02:44		6.613	0.213	0	0.006	0.04	0																1.65	0.338	0	0.006	0.04	0
2016-12-29 08:02:48		5.75	0.344	-0.01	0.013	0.04	0																1.838	0.338	-0.01	0.013	0.04	0
2016-12-29 09:02:56		4.6	0.365	-0.01	0.013	0.03	0																1.838	0.338	-0.01	0.013	0.03	0
2016-12-29 10:02:40		4.744	0.162	0	0.013	0.03	0																1.838	0.338	0	0.013	0.03	0
2016-12-29 11:02:48		3.163	-0.061	0	0.019	0.04	0																1.744	0.3	0	0.019	0.04	0
2016-12-29 12:03:58		5.463	0.02	0	0.019	0.03	0																2.119	0.375	0	0.019	0.03	0
2016-12-29 13:02:30		4.888	-0.03	0.01	0.025	0.04	0																2.119	0.338	0.01	0.025	0.04	0
2016-12-29 14:02:49		3.594	-0.111	0.01	0.025	0.04	0																2.025	0.338	0.01	0.025	0.04	0
2016-12-29 15:02:52		2.013	-0.192	0.02	0.031	0.04	0																1.838	0.263	0.02	0.031	0.04	0
2016-12-29 16:04:43		1.006	-0.233	0.03	0.038	0.03	0																1.65	0.15	0.03	0.038	0.03	0
2016-12-29 17:04:00		-0.575	-0.314	0.02	0.038	0.01	0																1.463	0.038	0.02	0.038	0.01	0
2016-12-29 18:02:46		-1.869	-0.385	0.03	0.038	0.04	0																1.088	-0.075	0.03	0.038	0.04	0
2016-12-29 19:03:21		-3.163	-0.415	0.03	0.044	0.03	0																0.806	-0.225	0.03	0.044	0.03	0
2016-12-29 20:02:52		-3.738	-0.435	0.01	0.038	0.02	0																0.525	-1.875	0.01	0.038	0.02	0
2016-12-29 21:02:51		-5.175	-0.486	0.02	0.038	0.02	0																0.15	-0.375	0.02	0.038	0.02	0
2016-12-29 22:02:46		-6.756	-0.527	0.01	0.031	0.02	0																-0.131	-0.525	0.01	0.031	0.02	0
2016-12-29 23:02:45		-8.05	-0.557	0.01	0.038	0.04	-0.063																-0.506	-0.6	0.01	0.038	0.04	-0.063
2016-12-30 00:02:50		-8.625	-0.597	0	0.025	0.03	0																-0.881	-0.713	0	0.025	0.03	0
2016-12-30 01:02:46		-8.625	-0.709	-0.01	0.025	0.02	0																-1.163	-0.825	-0.01	0.025	0.02	0
2016-12-30 02:02:49		-8.769	-0.901	-0.02	0.019	0.04	-0.063																-1.35	-0.938	-0.02	0.019	0.04	-0.063
2016-12-30 03:02:42		-9.056	-1.154	-0.04	0.019	0.02	0																-1.631	-0.975	-0.04	0.019	0.02	0
2016-12-30 04:02:45		-9.488	-1.448	-0.04	0.013	0.03	0																-1.819	-1.05	-0.04	0.013	0.03	0
2016-12-30 05:02:46		-9.775	-1.762	-0.06	0.006	0.01	0																-1.913	-1.125	-0.06	0.006	0.01	0
2016-12-30 06:02:46		-9.631	-2.086	-0.06	0	0.03	0																-2.1	-1.163	-0.06	0	0.03	0
2016-12-30 07:02:46		-9.056	-2.41	-0.08	-0.006	0.03	0																-2.194	-1.163	-0.08	-0.006	0.03	0
2016-12-30 08:02:50		-6.613	-2.43	-0.07	-0.013	0.03	0																-2.381	-1.163	-0.07	-0.013	0.03	0
2016-12-30 09:02:44		-5.319	-1.843	-0.05	-0.019	0.03	0																-2.194	-1.125	-0.05	-0.019	0.03	0
2016-12-30 10:03:01		-5.031	-0.82	-0.08	-0.013	0.04	0																-2.1	-1.013	-0.08	-0.013	0.04	0
2016-12-30 11:04:39		-2.013	-0.233	-0.08	-0.019	0.05	0																-2.006	-0.9	-0.08	-0.019	0.05	0
2016-12-30 13:02:27		-3.881	-0.324	-0.09	-0.025	0.04	0																-2.194	-0.863	-0.09	-0.025	0.04	0
2016-12-30 14:03:03		-3.881	-0.344	-0.09	-0.031	0.03	0																-2.006	-0.825	-0.09	-0.031	0.03	0
2016-12-30 15:02:52		-3.594	-0.324	-0.09	-0.038	0.03	0																-1.913	-0.825	-0.09	-0.038	0.03	0
2016-12-30 16:03:22		-3.019	-0.314	-0.09	-0.038	0.03	0																-1.725	-0.788	-0.09	-0.038	0.03	0
2016-12-30 17:03:28		-2.875	-0.324	-0.1	-0.044	0.02	0																-1.725	-0.713	-0.1	-0.044	0.02	0
2016-12-30 18:02:27		-2.731	-0.324	-0.11	-0.038	0.03	0																-1.631	-0.75	-0.11	-0.038	0.03	0
2016-12-30 19:02:43		-2.731	-0.344	-0.11	-0.044	0.01	0																-1.538	-0.675	-0.11	-0.044	0.01	0
2016-12-30 20:02:48		-2.875	-0.344	-0.11	-0.044	0.03	0																-1.444	-0.675	-0.11	-0.044	0.03	0
2016-12-30 21:02:44		-3.019	-0.354	-0.1	-0.05	0.03	0																-1.444	-0.675	-0.1	-0.05	0.03	0
2016-12-30 22:02:44		-2.444	-0.354	-0.1	-0.05	0.04	-0.063																-1.35	-0.638	-0.1	-0.05	0.04	-0.063
2016-12-30 23:02:48		-1.869	-0.354	-0.1	-0.044	0.03	0																-1.35	-0.6	-0.1	-0.044	0.03	0
2016-12-31 00:02:44		-1.006	-0.344	-0.1	-0.05	0.01	0.063																-1.163	-0.563	-0.1	-0.05	0.01	0.063
2016-12-31 01:02:45		-0.719	-0.324	-0.1	-0.044	0.02	0																-1.069	-0.525	-0.1	-0.044	0.02	0
2016-12-31 02:02:48		-0.288	-0.243	-0.1	-0.05	0.03	0																-0.975	-0.488	-0.1	-0.05	0.03	0
2016-12-31 03:02:44		1.006	-0.132	-0.1	-0.05	0.01	0.063																-0.881	-0.413	-0.1	-0.05	0.01	0.063
2016-12-31 04:02:46		1.581	0	-0.08	-0.05	0.03	-0.063																-0.788	-0.3	-0.08	-0.05	0.03	-0.063
2016-12-31 05:02:42		1.438	0.162	-0.09	-0.05	0.02	0																-0.6	-0.3	-0.09	-0.05	0.02	0
2016-12-31 06:02:45		2.3	0.324	-0.07	-0.05	0.04	0																-0.6	-0.188	-0.07	-0.05	0.04	0
2016-12-31 07:02:44		2.156	0.516	-0.09	-0.044	0.04	-0.063																-0.413	-0.188	-0.09	-0.044	0.04	-0.063
2016-12-31 08:02:49		1.869	0.709	-0.07	-0.044	0.03	-0.063																-0.319	-0.188	-0.07	-0.044	0.03	-0.063
2016-12-31 09:02:42		0.863	0.81	-0.08	-0.044	0.03	-0.063																-0.131	-0.188	-0.08	-0.044	0.03	-0.063
2016-12-31 10:02:45		0.863	0.678	-0.09	-0.038	0.04	0																-0.131	-0.15	-0.09	-0.038	0.04	0
2016-12-31 11:03:33		3.163	0.253	-0.07	-0.044	0.03	0																-0.131	-0.15	-0.07	-0.044	0.03	0
2016-12-31 12:02:54		3.45	-0.142	-0.08	-0.044	0.02	0																0.15	-0.038	-0.08	-0.044	0.02	0
2016-12-31 14:02:50		2.875	-0.182	-0.07	-0.038	0.02	-0.063																0.338	0	-0.07	-0.038	0.02	-0.063
2016-12-31 14:02:50		3.019	-0.152	-0.07	-0.031	0.04	-0.063																0.431	0.075	-0.07	-0.031	0.04	-0.063
2016-12-31 15:03:07		2.444	-0.182	-0.08	-0.031	0.03	0																0.525	0.075	-0.08	-0.031	0.03	0
2016-12-31 16:03:14		2.444	-0.172	-0.07	-0.025	0.03	0																0.525	0.113	-0.07	-0.025	0.03	0
2016-12-31 17:02:44		2.588	-0.142	-0.06	-0.025	0.04	-0.063																0.619	0.038	-0.06	-0.025	0.04	-0.063
2016-12-31 18:02:47		3.45	-0.111	-0.06	-0.025	0.03	-0.063																0.713	0.113	-0.06	-0.025	0.03	-0.063
2016-12-31 19:02:49		5.175	0	-0.06	-0.019	0.05	-0.063																0.9	0.15	-0.06	-0.019	0.05	-0.063
2016-12-31 20:02:47		7.188	0.051	-0.05	-0.019	0.04	-0.063																1.088	0.263	-0.05	-0.019	0.04	-0.063
2016-12-31 21:02:43		6.181	-0.01	-0.04	-0.006	0.03	-0.063																1.275	0.3	-0.04	-0.006	0.03	-0.063
2016-12-31 22:02:44		6.038	-0.02	-0.04	-0.006	0.02	0																1.463	0.338	-0.04	-0.006	0.02	0
2016-12-31 23:02:47		6.325	-0.02	-0.04	0	0.03	-0.063																1.65	0.338	-0.04	0	0.03	-0.063
2017-01-01 00:02:43		5.894	-0.041	-0.02	0	0.03	-0.063																1.65	0.3	-0.02	0	0.03	-0.063
2017-01-01 01:02:48		6.325	-0.01	-0.01	0	0.03	-0.063																1.744	0.375	-0.01	0	0.03	-0.063
2017-01-01 02:02:47		6.756	0.081	-0.01	0.006	0.03	-0.063																1.838	0.413	-0.01	0.006	0.03	-0.063
2017-01-01 03:02:46		6.469	0.203	-0.01	0.013	0.03	-0.063																2.025	0.413	-0.01	0.013	0.03	-0.063
2017-01-01 04:02:48		6.469	0.334	-0.01	0.013	0.02	0																2.213	0.375	-0.01	0.013	0.02	0
2017-01-01 05:02:46		7.188	0.476	0	0.019	0.03	-0.063																2.213	0.45	0	0.019	0.03	-0.063
2017-01-01 06:02:47		6.756	0.628	0	0.025	0.03	-0.125																2.4	0.488	0	0.025	0.03	-0.125
2017-01-01 07:02:44		6.9	0.78	0.01	0.025	0.01	0																2.494	0.488	0.01	0.025	0.01	0
2017-01-01 08:02:49		7.188	0.942	0.02	0.025	0.04	-0.063																2.494	0.563	0.02	0.025	0.04	-0.063
2017-01-01 09:02:46		7.188	0.942	0.02	0.031	0.03	-0.063																2.588	0.563	0.02	0.031	0.03	-0.063
2017-01-01 10:02:43		7.475	0.567	0.02	0.031	0.01	-0.125																2.588	0.525	0.02	0.031	0.01	-0.125
2017-01-01 11:02:45		5.175	-0.02	0.02	0.038	0.02	-0.125																2.775	0.488	0.02	0.038	0.02	-0.125
2017-01-01 12:04:33		1.15	-0.273	0.03	0.044	0.01	-0.125																2.588	0.338	0.03	0.044	0.01	-0.125
2017-01-01 13:02:43		-2.444	-0.456	0.04	0.044	0.01	-0.063																2.119	0.113	0.04	0.044	0.01	-0.063
2017-01-01 14:02:50		-6.038	-0.638	0.04	0.044	-0.01	-0.063																1.463	-0.15	0.04	0.044	-0.01	-0.063
2017-01-01 15:03:47		-7.763	-0.699	0.05	0.05	0	-0.125																0.806	-0.375	0.05	0.05	0	-0.125
2017-01-01 16:02:52		-8.769	-0.719	0.04	0.044	0	-0.125																0.15	-0.6	0.04	0.044	0	-0.125
2017-01-01 17:02:42		-8.05	-0.658	0.04	0.044	0	-0.063																-0.319	-0.675	0.04	0.044	0	-0.063
2017-01-01 18:02:59		-6.469	-0.537	0.05	0.038	0.02	-0.063																-0.694	-0.713	0.05	0.038	0.02	-0.063
2017-01-01 19:03:21		-5.319	-0.486	0.03	0.038	0.01	-0.063																-0.881	-1.875	0.03	0.038	0.01	-0.063
2017-01-01 20:02:50		-4.888	-0.435	0.02	0.031	0.01	-0.063																-0.881	-0.713	0.02	0.031	0.01	-0.063
2017-01-01 22:02:46		-2.444	-0.294	0.01	0.019	0.02	-0.063																-0.788	-0.638	0.01	0.019	0.02	-0.063
2017-01-01 23:02:42		-1.15	-0.223	0	0.019	0.02	-0.063																-0.694	-0.563	0	0.019	0.02	-0.063
2017-01-02 00:02:47		-0.431	-0.182	0	0.013	0.02	-0.063																-0.506	-0.45	0	0.013	0.02	-0.063
2017-01-02 01:02:42		0.431	-0.122	-0.01	0.013	0.03	-0.063																-0.319	-0.338	-0.01	0.013	0.03	-0.063
2017-01-02 02:02:55		0.575	-0.132	-0.02	0.013	0.03	-0.063																-0.131	-0.3	-0.02	0.013	0.03	-0.063
2017-01-02 03:02:43		0.144	-0.162	-0.02	0.013	0.02	-0.063																-0.038	-0.263	-0.02	0.013	0.02	-0.063
2017-01-02 04:02:43		-0.288	-0.203	-0.01	0	0.03	-0.063																-0.038	-0.225	-0.01	0	0.03	-0.063
2017-01-02 05:02:46		-0.575	-0.203	-0.01	0.006	0.02	-0.063																-0.038	-0.225	-0.01	0.006	0.02	-0.063
2017-01-02 06:02:42		-0.863	-0.213	-0.02	0	0.02	-0.063																-0.038	-0.225	-0.02	0	0.02	-0.063
2017-01-02 07:02:45		-0.863	-0.213	-0.02	0	0.02	0																-0.038	-0.3	-0.02	0	0.02	0
2017-01-02 08:02:49		-1.006	-0.223	-0.02	0	0.04	-0.125																-0.131	-0.263	-0.02	0	0.04	-0.125
2017-01-02 09:02:45		-1.294	-0.223	-0.03	0.006	0.02	-0.063																-0.131	-0.3	-0.03	0.006	0.02	-0.063
2017-01-02 10:02:48		-1.581	-0.253	-0.02	0.006	0.01	0																-0.131	-0.263	-0.02	0.006	0.01	0
2017-01-02 11:02:47		-2.444	-0.304	-0.02	0	0.02	0																-0.225	-0.3	-0.02	0	0.02	0
2017-01-02 12:02:44		-3.163	-0.334	-0.03	0	0.02	-0.063																-0.413	-0.338	-0.03	0	0.02	-0.063
2017-01-02 13:05:21		-4.169	-0.385	-0.03	0	0.01	0																-0.506	-0.413	-0.03	0	0.01	0
2017-01-02 14:02:59		-4.6	-0.385	-0.03	0	0.01	0																-0.694	-0.488	-0.03	0	0.01	0
2017-01-02 15:03:29		-4.313	-0.354	-0.04	0	0.01	0																-0.788	-0.563	-0.04	0	0.01	0
2017-01-02 16:02:46		-3.881	-0.334	-0.03	-0.006	0.02	-0.063																-0.975	-0.563	-0.03	-0.006	0.02	-0.063
2017-01-02 17:02:43		-3.45	-0.304	-0.04	-0.006	0.01	0																-0.975	-0.6	-0.04	-0.006	0.01	0
2017-01-02 18:03:47		-3.45	-0.304	-0.05	-0.006	0.01	0																-1.069	-0.6	-0.05	-0.006	0.01	0
2017-01-02 19:02:33		-3.45	-0.314	-0.05	-0.006	0.01	0																-1.069	-0.6	-0.05	-0.006	0.01	0
2017-01-02 20:03:19		-3.881	-0.314	-0.04	-0.013	0.02	0																-1.069	-0.638	-0.04	-0.013	0.02	0
2017-01-02 21:02:50		-3.881	-0.324	-0.05	-0.013	0.02	0																-1.163	-0.6	-0.05	-0.013	0.02	0
2017-01-02 22:02:49		-3.881	-0.324	-0.04	-0.019	0.01	0																-1.163	-0.6	-0.04	-0.019	0.01	0
2017-01-02 23:02:43		-3.881	-0.324	-0.05	-0.019	0.01	0																-1.163	-0.638	-0.05	-0.019	0.01	0
2017-01-03 00:02:43		-3.881	-0.304	-0.05	-0.025	0.01	0																-1.256	-0.6	-0.05	-0.025	0.01	0
2017-01-03 01:02:44		-4.169	-0.324	-0.06	-0.025	0.01	-0.063																-1.35	-0.638	-0.06	-0.025	0.01	-0.063
2017-01-03 02:02:49		-4.456	-0.314	-0.05	-0.031	0.01	0																-1.35	-0.675	-0.05	-0.031	0.01	0
2017-01-03 03:02:44		-4.456	-0.304	-0.06	-0.031	0.03	-0.063																-1.35	-0.713	-0.06	-0.031	0.03	-0.063
2017-01-03 04:02:45		-4.456	-0.284	-0.06	-0.025	0.02	-0.063																-1.444	-0.713	-0.06	-0.025	0.02	-0.063
2017-01-03 05:02:44		-4.169	-0.263	-0.06	-0.038	0.03	-0.063																-1.35	-0.75	-0.06	-0.038	0.03	-0.063
2017-01-03 06:02:45		-3.881	-0.243	-0.06	-0.031	0.03	-0.063																-1.35	-0.788	-0.06	-0.031	0.03	-0.063
2017-01-03 07:03:16		-3.881	-0.233	-0.06	-0.038	0.02	-0.063																-1.35	-0.75	-0.06	-0.038	0.02	-0.063
2017-01-03 08:02:52		-3.594	-0.223	-0.06	-0.038	0.01	0																-1.35	-0.75	-0.06	-0.038	0.01	0
2017-01-03 09:03:11		-3.163	-0.203	-0.06	-0.038	0.01	0																-1.256	-0.713	-0.06	-0.038	0.01	0
2017-01-03 10:02:47		-3.019	-0.192	-0.07	-0.044	0.02	-0.063																-1.256	-0.75	-0.07	-0.044	0.02	-0.063
2017-01-03 11:03:19		-3.163	-0.203	-0.07	-0.038	0.02	-0.063																-1.163	-0.713	-0.07	-0.038	0.02	-0.063
2017-01-03 12:02:55		-3.594	-0.203	-0.07	-0.038	0.01	0																-1.163	-0.713	-0.07	-0.038	0.01	0
2017-01-03 13:02:47		-3.738	-0.192	-0.07	-0.044	0.03	-0.063																-1.256	-0.713	-0.07	-0.044	0.03	-0.063
2017-01-03 14:02:49		-3.881	-0.192	-0.08	-0.044	0.03	-0.063																-1.256	-0.713	-0.08	-0.044	0.03	-0.063
2017-01-03 15:02:45		-3.738	-0.172	-0.06	-0.05	0.02	-0.063																-1.35	-0.713	-0.06	-0.05	0.02	-0.063
2017-01-03 16:03:03		-3.594	-0.142	-0.08	-0.044	0.01	0																-1.444	-0.713	-0.08	-0.044	0.01	0
2017-01-03 17:02:45		-3.45	-0.122	-0.07	-0.044	0.02	-0.063																-1.35	-0.713	-0.07	-0.044	0.02	-0.063
2017-01-03 18:02:46		-2.875	-0.091	-0.08	-0.044	0.02	-0.063																-1.35	-0.713	-0.08	-0.044	0.02	-0.063
2017-01-03 19:02:45		-2.588	-0.061	-0.08	-0.05	0.02	-0.063																-1.256	-0.675	-0.08	-0.05	0.02	-0.063
2017-01-03 20:04:04		-2.156	-0.03	-0.08	-0.05	0.01	-0.063																-1.163	-0.713	-0.08	-0.05	0.01	-0.063
2017-01-03 21:02:44		-1.869	-0.02	-0.08	-0.05	0.01	-0.063																-1.069	-0.675	-0.08	-0.05	0.01	-0.063
2017-01-03 22:02:42		-1.869	0.01	-0.09	-0.05	0.02	-0.063																-0.975	-0.675	-0.09	-0.05	0.02	-0.063
2017-01-03 23:02:45		-2.875	0.041	-0.07	-0.05	0.01	-0.063																-0.975	-0.713	-0.07	-0.05	0.01	-0.063
2017-01-04 00:02:47		-1.438	0.02	-0.07	-0.05	0.01	-0.063																-0.881	-0.675	-0.07	-0.05	0.01	-0.063
2017-01-04 01:02:43		-0.719	0.061	-0.08	-0.05	0.01	0																-0.694	-0.6	-0.08	-0.05	0.01	0
2017-01-04 02:02:50		-0.144	0.081	-0.08	-0.044	0.02	-0.125																-0.6	-0.6	-0.08	-0.044	0.02	-0.125
2017-01-04 03:02:46		-1.438	0.132	-0.07	-0.05	0	-0.063																-0.6	-0.6	-0.07	-0.05	0	-0.063
2017-01-04 04:02:43		-2.875	0.152	-0.07	-0.05	-0.02	0																-0.506	-0.563	-0.07	-0.05	-0.02	0
2017-01-04 05:02:43		-3.306	0.152	-0.07	-0.044	-0.02	0																-0.6	-0.488	-0.07	-0.044	-0.02	0
2017-01-04 06:02:44		-3.45	0.142	-0.08	-0.044	-0.01	-0.063																-0.506	-0.45	-0.08	-0.044	-0.01	-0.063
2017-01-04 07:02:44		-3.594	0.152	-0.08	-0.038	-0.01	-0.063																-0.506	-1.875	-0.08	-0.038	-0.01	-0.063
2017-01-04 08:02:47		-4.025	0.152	-0.07	-0.044	-0.02	-0.063																-0.506	-0.413	-0.07	-0.044	-0.02	-0.063
2017-01-04 10:04:10		-1.869	0.091	-0.08	-0.044	-0.02	0																-0.413	-0.45	-0.08	-0.044	-0.02	0
2017-01-04 10:04:10		-1.15	0.091	-0.07	-0.038	-0.01	-0.063																-0.413	-0.413	-0.07	-0.038	-0.01	-0.063
2017-01-04 11:02:28		-0.575	0.081	-0.07	-0.038	0	-0.063																-0.319	-0.413	-0.07	-0.038	0	-0.063
2017-01-04 12:03:23		0	0.101	-0.07	-0.038	0	-0.063																-0.319	-0.338	-0.07	-0.038	0	-0.063
2017-01-04 13:02:55		0.431	0.152	-0.06	-0.038	-0.01	-0.063																-0.225	-0.263	-0.06	-0.038	-0.01	-0.063
2017-01-04 14:02:51		0.863	0.263	-0.05	-0.038	-0.01	-0.063																-0.225	-0.225	-0.05	-0.038	-0.01	-0.063
2017-01-04 15:02:46		1.006	0.395	-0.06	-0.031	0	-0.063																-0.225	-0.188	-0.06	-0.031	0	-0.063
2017-01-04 16:02:44		0.863	0.496	-0.05	-0.031	-0.01	-0.063																-0.131	-0.15	-0.05	-0.031	-0.01	-0.063
2017-01-04 17:02:44		-0.144	0.557	-0.06	-0.031	-0.01	-0.063																-0.225	-0.188	-0.06	-0.031	-0.01	-0.063
2017-01-04 18:02:50		-1.869	0.587	-0.05	-0.031	-0.01	-0.063																-0.131	-0.3	-0.05	-0.031	-0.01	-0.063
2017-01-04 19:02:46		-2.731	0.597	-0.05	-0.031	-0.02	-0.063																-0.319	-0.338	-0.05	-0.031	-0.02	-0.063
2017-01-04 20:02:48		-3.163	0.587	-0.06	-0.031	-0.03	-0.063																-0.413	-0.3	-0.06	-0.031	-0.03	-0.063
2017-01-04 21:02:45		-3.881	0.587	-0.06	-0.031	-0.02	-0.125																-0.413	-0.3	-0.06	-0.031	-0.02	-0.125
2017-01-04 22:02:44		-4.025	0.537	-0.06	-0.025	-0.03	-0.125																-0.506	-0.3	-0.06	-0.025	-0.03	-0.125
2017-01-04 23:02:44		-2.875	0.435	-0.07	-0.025	-0.02	-0.125																-0.506	-0.263	-0.07	-0.025	-0.02	-0.125
2017-01-05 00:02:45		-4.456	0.354	-0.08	-0.031	-0.01	-0.125																-0.6	-0.338	-0.08	-0.031	-0.01	-0.125
2017-01-05 01:02:47		-3.594	0.223	-0.07	-0.031	-0.03	-0.125																-0.6	-0.338	-0.07	-0.031	-0.03	-0.125
2017-01-05 02:02:47		-3.019	0.152	-0.07	-0.031	-0.04	-0.063																-0.6	-0.338	-0.07	-0.031	-0.04	-0.063
2017-01-05 03:02:42		-1.581	0.091	-0.07	-0.025	-0.03	-0.063																-0.6	-0.263	-0.07	-0.025	-0.03	-0.063
2017-01-05 04:02:45		0.144	0.041	-0.08	-0.031	-0.01	-0.125																-0.506	-0.338	-0.08	-0.031	-0.01	-0.125
2017-01-05 05:02:45		1.006	0.01	-0.08	-0.031	-0.01	-0.125																-0.506	-0.3	-0.08	-0.031	-0.01	-0.125
2017-01-05 06:02:46		1.294	0.041	-0.07	-0.031	0	-0.125																-0.506	-0.3	-0.07	-0.031	0	-0.125
2017-01-05 07:02:43		1.725	0.041	-0.06	-0.031	-0.01	-0.063																-0.506	-0.263	-0.06	-0.031	-0.01	-0.063
2017-01-05 08:02:56		2.3	0.061	-0.06	-0.031	0	-0.063																-0.413	-0.263	-0.06	-0.031	0	-0.063
2017-01-05 09:02:44		0.288	0.132	-0.06	-0.031	0	-0.188																-0.506	-0.225	-0.06	-0.031	0	-0.188
2017-01-05 10:02:43		-0.719	0.192	-0.06	-0.031	-0.01	-0.125																-0.506	-0.225	-0.06	-0.031	-0.01	-0.125
2017-01-05 11:03:17		-1.294	0.284	-0.05	-0.038	-0.01	-0.125																-0.6	-0.225	-0.05	-0.038	-0.01	-0.125
2017-01-05 12:02:57		-1.725	0.334	-0.05	-0.038	-0.01	-0.125																-0.6	-0.263	-0.05	-0.038	-0.01	-0.125
2017-01-05 13:03:09		-1.869	0.375	-0.07	-0.031	-0.02	-0.125																-0.6	-0.338	-0.07	-0.031	-0.02	-0.125
2017-01-05 14:02:52		-2.013	0.334	-0.06	-0.038	-0.02	-0.125																-0.6	-0.338	-0.06	-0.038	-0.02	-0.125
2017-01-05 15:02:45		-2.013	0.263	-0.06	-0.038	-0.03	-0.125																-0.6	-0.338	-0.06	-0.038	-0.03	-0.125
2017-01-05 16:04:14		-1.725	0.192	-0.06	-0.038	-0.02	-0.125																-0.6	-0.375	-0.06	-0.038	-0.02	-0.125
2017-01-05 17:02:51		-0.575	0.162	-0.06	-0.038	-0.02	-0.125																-0.506	-0.3	-0.06	-0.038	-0.02	-0.125
2017-01-05 18:02:45		1.006	0.152	-0.06	-0.038	-0.02	-0.125																-0.506	-0.15	-0.06	-0.038	-0.02	-0.125
2017-01-05 19:02:45		2.013	0.152	-0.06	-0.031	-0.01	-0.188																-0.319	-0.113	-0.06	-0.031	-0.01	-0.188
2017-01-05 20:02:49		2.588	0.162	-0.05	-0.031	0.01	-0.188																-0.225	-0.075	-0.05	-0.031	0.01	-0.188
2017-01-05 21:02:42		3.163	0.192	-0.04	-0.038	-0.01	-0.125																-0.225	-0.075	-0.04	-0.038	-0.01	-0.125
2017-01-05 22:02:44		3.594	0.243	-0.04	-0.038	0.01	-0.125																-0.038	-0.075	-0.04	-0.038	0.01	-0.125
2017-01-05 23:02:45		3.881	0.324	-0.05	-0.038	0	-0.125																0.056	-0.038	-0.05	-0.038	0	-0.125
2017-01-06 00:02:45		4.169	0.446	-0.04	-0.031	-0.01	-0.125																0.056	0.038	-0.04	-0.031	-0.01	-0.125
2017-01-06 01:02:45		3.163	0.577	-0.03	-0.031	0	-0.125																0.15	0.038	-0.03	-0.031	0	-0.125
2017-01-06 02:02:49		2.588	0.638	-0.04	-0.031	0	-0.125																0.15	0.038	-0.04	-0.031	0	-0.125
2017-01-06 03:02:46		2.875	0.658	-0.04	-0.031	0	-0.125																0.244	1.875	-0.04	-0.031	0	-0.125
2017-01-06 04:02:45		2.731	0.719	-0.03	-0.025	0	-0.188																0.244	0.113	-0.03	-0.025	0	-0.188
2017-01-06 05:02:45		2.444	0.739	-0.04	-0.025	-0.01	-0.188																0.338	0.075	-0.04	-0.025	-0.01	-0.188
2017-01-06 06:02:48		2.3	0.729	-0.03	-0.031	-0.03	-0.125																0.338	1.875	-0.03	-0.031	-0.03	-0.125
2017-01-06 07:02:46		2.013	0.729	-0.04	-0.031	-0.02	-0.188																0.431	0.075	-0.04	-0.031	-0.02	-0.188
2017-01-06 08:02:49		1.869	0.719	-0.04	-0.025	-0.02	-0.188																0.431	1.875	-0.04	-0.025	-0.02	-0.188
2017-01-06 09:02:42		1.725	0.709	-0.03	-0.025	-0.02	-0.125																0.431	1.875	-0.03	-0.025	-0.02	-0.125
2017-01-06 10:02:50		1.725	0.668	-0.04	-0.025	-0.03	-0.125																0.431	0.113	-0.04	-0.025	-0.03	-0.125
2017-01-06 11:02:43		1.725	0.638	-0.05	-0.019	-0.04	-0.125																0.431	0.113	-0.05	-0.019	-0.04	-0.125
2017-01-06 12:02:44		1.869	0.597	-0.04	-0.019	-0.02	-0.188																0.431	0.113	-0.04	-0.019	-0.02	-0.188
2017-01-06 13:02:53		1.725	0.587	-0.03	-0.019	-0.02	-0.125																0.431	0.113	-0.03	-0.019	-0.02	-0.125
2017-01-06 14:03:33		1.725	0.618	-0.04	-0.013	-0.01	-0.188																0.431	0.113	-0.04	-0.013	-0.01	-0.188
2017-01-06 15:02:28		1.294	0.689	-0.04	-0.013	-0.01	-0.188																0.431	0.113	-0.04	-0.013	-0.01	-0.188
2017-01-06 16:02:58		1.294	0.79	-0.04	-0.013	-0.01	-0.188																0.431	0.113	-0.04	-0.013	-0.01	-0.188
2017-01-06 17:02:43		1.006	0.881	-0.03	-0.013	-0.01	-0.188																0.338	0.113	-0.03	-0.013	-0.01	-0.188
2017-01-06 18:02:46		0.719	0.962	-0.03	-0.013	-0.02	-0.188																0.338	0.075	-0.03	-0.013	-0.02	-0.188
2017-01-06 19:02:43		0.288	1.043	-0.03	-0.013	-0.01	-0.188																0.338	0.075	-0.03	-0.013	-0.01	-0.188
2017-01-06 20:02:48		0.144	1.094	-0.03	-0.013	-0.02	-0.188																0.338	0.038	-0.03	-0.013	-0.02	-0.188
2017-01-06 21:02:44		0.288	1.114	-0.03	-0.013	-0.01	-0.188																0.244	0.038	-0.03	-0.013	-0.01	-0.188
2017-01-06 22:02:43		0.144	1.144	-0.04	-0.013	-0.02	-0.188																0.15	0.075	-0.04	-0.013	-0.02	-0.188
2017-01-06 23:02:46		-0.144	1.175	-0.03	-0.013	-0.02	-0.188																0.056	0.075	-0.03	-0.013	-0.02	-0.188
2017-01-07 00:02:44		-0.288	1.154	-0.03	-0.013	-0.02	-0.188																0.15	0	-0.03	-0.013	-0.02	-0.188
2017-01-07 01:02:44		-0.575	1.134	-0.05	-0.013	-0.02	-0.188																0.056	-0.038	-0.05	-0.013	-0.02	-0.188
2017-01-07 02:02:48		-0.719	1.124	-0.04	-0.013	-0.03	-0.188																-0.038	-0.038	-0.04	-0.013	-0.03	-0.188
2017-01-07 03:02:44		-1.006	1.104	-0.03	-0.019	-0.03	-0.188																-0.038	-0.038	-0.03	-0.019	-0.03	-0.188
2017-01-07 04:02:44		-1.294	1.053	-0.03	-0.019	-0.03	-0.188																-0.131	-0.075	-0.03	-0.019	-0.03	-0.188
2017-01-07 05:02:44		-1.581	1.013	-0.03	-0.019	-0.02	-0.188																-0.225	-0.075	-0.03	-0.019	-0.02	-0.188
2017-01-07 06:02:44		-1.725	0.952	-0.03	-0.013	-0.02	-0.188																-0.225	-0.113	-0.03	-0.013	-0.02	-0.188
2017-01-07 07:02:44		-1.581	0.881	-0.04	-0.013	-0.02	-0.188																-0.319	-0.113	-0.04	-0.013	-0.02	-0.188
2017-01-07 08:02:48		-1.725	0.81	-0.04	-0.013	-0.02	-0.188																-0.413	-0.075	-0.04	-0.013	-0.02	-0.188
2017-01-07 09:02:52		-2.013	0.729	-0.03	-0.019	-0.02	-0.188																-0.413	-0.15	-0.03	-0.019	-0.02	-0.188
2017-01-07 10:02:55		-2.013	0.689	-0.03	-0.019	-0.01	-0.188																-0.506	-0.113	-0.03	-0.019	-0.01	-0.188
2017-01-07 11:02:45		-1.869	0.689	-0.03	-0.019	-0.01	-0.188																-0.506	-0.113	-0.03	-0.019	-0.01	-0.188
2017-01-07 12:02:45		-1.438	0.79	-0.04	-0.019	-0.03	-0.125																-0.506	-0.113	-0.04	-0.019	-0.03	-0.125
2017-01-07 13:02:46		-0.144	0.911	-0.02	-0.025	-0.01	-0.25																-0.506	-0.075	-0.02	-0.025	-0.01	-0.25
2017-01-07 14:02:55		1.294	0.972	-0.03	-0.025	-0.02	-0.188																-0.319	-0.075	-0.03	-0.025	-0.02	-0.188
2017-01-07 15:02:51		2.588	0.952	-0.03	-0.025	-0.01	-0.188																-0.131	-0.038	-0.03	-0.025	-0.01	-0.188
2017-01-07 16:02:46		2.588	0.84	-0.04	-0.025	-0.01	-0.188																0.056	0	-0.04	-0.025	-0.01	-0.188
2017-01-07 17:03:45		1.581	0.678	-0.05	-0.025	-0.02	-0.188																0.15	0.075	-0.05	-0.025	-0.02	-0.188
2017-01-07 18:03:22		0.288	0.506	-0.04	-0.025	-0.01	-0.188																0.15	0.113	-0.04	-0.025	-0.01	-0.188
2017-01-07 19:03:06		-0.431	0.354	-0.05	-0.025	-0.03	-0.125																0.056	0.075	-0.05	-0.025	-0.03	-0.125
2017-01-07 20:02:49		-0.863	0.243	-0.05	-0.025	-0.03	-0.125																-0.038	0.75	-0.05	-0.025	-0.03	-0.125
2017-01-07 21:02:43		-1.438	0.132	-0.05	-0.019	-0.03	-0.125																-0.131	0.375	-0.05	-0.019	-0.03	-0.125
2017-01-07 22:02:45		-1.869	-0.03	-0.04	-0.019	-0.04	-0.125																-0.225	0	-0.04	-0.019	-0.04	-0.125
2017-01-07 23:02:45		-2.3	-0.223	-0.04	-0.019	-0.02	-0.188																-0.225	-0.038	-0.04	-0.019	-0.02	-0.188
2017-01-08 00:02:46		-2.444	-0.486	-0.04	-0.019	-0.02	-0.188																-0.413	0	-0.04	-0.019	-0.02	-0.188
2017-01-08 01:02:47		-2.875	-0.83	-0.03	-0.025	-0.04	-0.188																-0.506	-0.375	-0.03	-0.025	-0.04	-0.188
2017-01-08 02:02:47		-3.306	-1.337	-0.03	-0.025	-0.03	-0.188																-0.6	-0.038	-0.03	-0.025	-0.03	-0.188
2017-01-08 03:02:43		-3.738	-1.904	-0.05	-0.019	-0.03	-0.188																-0.694	-0.075	-0.05	-0.019	-0.03	-0.188
2017-01-08 04:02:45		-3.881	-2.46	-0.06	-0.019	-0.03	-0.125																-0.694	-0.075	-0.06	-0.019	-0.03	-0.125
2017-01-08 05:02:43		-4.456	-3.038	-0.05	-0.025	-0.03	-0.188																-0.788	-0.113	-0.05	-0.025	-0.03	-0.188
2017-01-08 06:02:43		-4.456	-3.665	-0.05	-0.025	-0.04	-0.188																-0.881	-0.15	-0.05	-0.025	-0.04	-0.188
2017-01-08 07:02:46		-4.456	-4.202	-0.05	-0.025	-0.03	-0.188																-0.881	-0.15	-0.05	-0.025	-0.03	-0.188
2017-01-08 08:02:48		-4.169	-4.587	-0.05	-0.031	-0.04	-0.188																-0.881	-0.225	-0.05	-0.031	-0.04	-0.188
2017-01-08 09:02:44		-2.875	-4.556	-0.07	-0.025	-0.03	-0.188																-0.881	-0.188	-0.07	-0.025	-0.03	-0.188
2017-01-08 10:02:51		-2.3	-4.253	-0.06	-0.031	-0.02	-0.188																-0.788	-0.225	-0.06	-0.031	-0.02	-0.188
2017-01-08 11:02:52		-2.156	-3.898	-0.06	-0.031	-0.02	-0.188																-0.788	-0.188	-0.06	-0.031	-0.02	-0.188
2017-01-08 13:02:55		-2.3	-3.432	-0.05	-0.031	-0.02	-0.188																-0.881	-0.113	-0.05	-0.031	-0.02	-0.188
2017-01-08 13:02:55		-3.45	-2.774	-0.07	-0.025	-0.03	-0.125																-0.975	-0.113	-0.07	-0.025	-0.03	-0.125
2017-01-08 14:02:48		-4.456	-1.802	-0.06	-0.031	-0.02	-0.188																-1.163	-0.075	-0.06	-0.031	-0.02	-0.188
2017-01-08 15:03:38		-3.306	-0.83	-0.07	-0.031	-0.03	-0.188																-1.256	-0.113	-0.07	-0.031	-0.03	-0.188
2017-01-08 16:02:28		-2.156	-0.03	-0.06	-0.038	-0.03	-0.188																-1.35	-0.075	-0.06	-0.038	-0.03	-0.188
2017-01-08 17:02:49		-1.294	0.354	-0.04	-0.038	-0.02	-0.188																-1.256	-0.113	-0.04	-0.038	-0.02	-0.188
2017-01-08 18:02:47		-1.006	0.375	-0.05	-0.044	-0.03	-0.188																-1.163	-0.113	-0.05	-0.044	-0.03	-0.188
2017-01-08 19:02:46		-0.863	0.395	-0.05	-0.044	-0.02	-0.188																-1.069	-0.075	-0.05	-0.044	-0.02	-0.188
2017-01-08 20:02:49		-0.719	0.405	-0.05	-0.044	-0.02	-0.188																-0.975	-0.038	-0.05	-0.044	-0.02	-0.188
2017-01-08 21:02:45		-0.288	0.425	-0.06	-0.044	-0.03	-0.188																-0.788	0	-0.06	-0.044	-0.03	-0.188
2017-01-08 22:02:48		0	0.486	-0.06	-0.044	-0.02	-0.188																-0.788	0.038	-0.06	-0.044	-0.02	-0.188
2017-01-08 23:02:45		0.144	0.567	-0.06	-0.044	-0.02	-0.188																-0.788	0	-0.06	-0.044	-0.02	-0.188
2017-01-09 00:02:45		0	0.668	-0.07	-0.044	-0.02	-0.188																-0.6	0.4	-0.07	-0.044	-0.02	-0.188
2017-01-09 01:02:49		-0.069	0.875	-0.06	-0.044	-0.02	-0.188																-0.6	0.4	-0.06	-0.044	-0.02	-0.188
2017-01-09 02:02:49		0	0.849	-0.06	-0.044	-0.02	-0.188																-0.506	0.475	-0.06	-0.044	-0.02	-0.188
2017-01-09 03:02:46		0.069	0.647	-0.06	-0.044	-0.03	-0.188																-0.506	0.475	-0.06	-0.044	-0.03	-0.188
2017-01-09 04:02:42		0.137	0.355	-0.05	-0.044	-0.03	-0.188																-0.506	0.55	-0.05	-0.044	-0.03	-0.188
2017-01-09 05:02:45		0.275	0.038	-0.05	-0.044	-0.03	-0.188																-0.413	0.55	-0.05	-0.044	-0.03	-0.188
2017-01-09 06:02:46		0.206	-0.127	-0.06	-0.044	-0.02	-0.125																-0.319	0.625	-0.06	-0.044	-0.02	-0.125
2017-01-09 07:02:48		-0.069	-0.152	-0.06	-0.044	-0.02	-0.125																-0.319	1.9	-0.06	-0.044	-0.02	-0.125
2017-01-09 08:02:52		0	-0.19	-0.05	-0.044	-0.03	-0.125																-0.319	0.55	-0.05	-0.044	-0.03	-0.125
2017-01-09 09:02:45		0	-0.139	-0.06	-0.038	-0.02	-0.188																-0.319	0.475	-0.06	-0.038	-0.02	-0.188
2017-01-09 10:02:43		0.137	-0.114	-0.05	-0.038	-0.03	-0.188																-0.225	0.55	-0.05	-0.038	-0.03	-0.188
2017-01-09 11:03:45		0.137	-0.038	-0.05	-0.038	-0.02	-0.188																-0.225	0.55	-0.05	-0.038	-0.02	-0.188
2017-01-09 12:02:44		0.137	0.165	-0.05	-0.038	-0.02	-0.188																-0.131	0.475	-0.05	-0.038	-0.02	-0.188
2017-01-09 13:02:44		0.206	0.444	-0.05	-0.044	-0.02	-0.188																-0.131	0.625	-0.05	-0.044	-0.02	-0.188
2017-01-09 14:02:51		0.893	0.571	-0.06	-0.038	-0.04	-0.125																-0.131	0.625	-0.06	-0.038	-0.04	-0.125
2017-01-09 15:02:43		1.03	0.558	-0.05	-0.038	-0.03	-0.125																-0.131	0.7	-0.05	-0.038	-0.03	-0.125
2017-01-09 16:02:43		0.893	0.368	-0.05	-0.031	-0.02	-0.188																0.056	0.625	-0.05	-0.031	-0.02	-0.188
2017-01-09 17:02:43		0.618	0.089	-0.06	-0.031	-0.03	-0.188																0.056	0.775	-0.06	-0.031	-0.03	-0.188
2017-01-09 18:02:46		0.069	0.025	-0.06	-0.031	-0.03	-0.188																0.056	0.625	-0.06	-0.031	-0.03	-0.188
2017-01-09 19:02:44		-0.275	-0.025	-0.06	-0.031	-0.03	-0.188																-0.038	0.55	-0.06	-0.031	-0.03	-0.188
2017-01-09 20:02:48		-0.412	-0.101	-0.07	-0.031	-0.04	-0.188																-0.038	-0.35	-0.07	-0.031	-0.04	-0.188
2017-01-09 21:02:44		-0.755	-0.254	-0.06	-0.031	-0.03	-0.25																-0.131	0.25	-0.06	-0.031	-0.03	-0.25
2017-01-09 22:02:45		-0.481	-0.532	-0.05	-0.031	-0.03	-0.188																-0.131	0.25	-0.05	-0.031	-0.03	-0.188
2017-01-09 23:02:45		-0.412	-0.913	-0.06	-0.031	-0.04	-0.188																-0.131	0.475	-0.06	-0.031	-0.04	-0.188
2017-01-10 00:02:46		-0.206	-1.395	-0.05	-0.031	-0.04	-0.125																-0.225	0.4	-0.05	-0.031	-0.04	-0.125
2017-01-10 01:02:46		0.069	-1.724	-0.06	-0.025	-0.02	-0.188																-0.225	0.55	-0.06	-0.025	-0.02	-0.188
2017-01-10 02:02:48		0.137	-1.826	-0.07	-0.025	-0.03	-0.188																-0.225	0.4	-0.07	-0.025	-0.03	-0.188
2017-01-10 03:02:44		-0.069	-1.788	-0.06	-0.025	-0.02	-0.188																-0.131	0.4	-0.06	-0.025	-0.02	-0.188
2017-01-10 04:02:45		0.137	-1.636	-0.06	-0.025	-0.02	-0.188																-0.131	0.4	-0.06	-0.025	-0.02	-0.188
2017-01-10 05:02:46		0.137	-1.217	-0.06	-0.025	-0.02	-0.125																-0.038	0.4	-0.06	-0.025	-0.02	-0.125
2017-01-10 06:02:45		0.137	-0.761	-0.06	-0.025	-0.02	-0.188																-0.131	0.475	-0.06	-0.025	-0.02	-0.188
2017-01-10 07:02:45		0.275	-0.469	-0.05	-0.025	-0.02	-0.188																-0.038	0.475	-0.05	-0.025	-0.02	-0.188
2017-01-10 08:02:49		0.137	-0.279	-0.06	-0.019	-0.01	-0.25																-0.038	0.475	-0.06	-0.019	-0.01	-0.25
2017-01-10 09:02:51		-0.137	-0.393	-0.05	-0.025	-0.03	-0.125																-0.131	0.475	-0.05	-0.025	-0.03	-0.125
2017-01-10 10:02:53		-0.343	-0.583	-0.05	-0.025	-0.02	-0.188																-0.131	0.4	-0.05	-0.025	-0.02	-0.188
2017-01-10 11:02:48		-0.343	-0.799	-0.05	-0.025	-0.03	-0.188																-0.131	0.325	-0.05	-0.025	-0.03	-0.188
2017-01-10 12:02:45		-0.343	-1.128	-0.05	-0.025	-0.03	-0.188																-0.131	0.175	-0.05	-0.025	-0.03	-0.188
2017-01-10 13:02:43		-0.412	-1.597	-0.05	-0.019	-0.03	-0.188																-0.225	0.175	-0.05	-0.019	-0.03	-0.188
2017-01-10 14:03:45		-1.167	-2.041	-0.05	-0.019	-0.02	-0.188																-0.131	0.025	-0.05	-0.019	-0.02	-0.188
2017-01-10 15:03:00		-1.923	-2.307	-0.04	-0.025	-0.01	-0.25																-0.225	-0.05	-0.04	-0.025	-0.01	-0.25
2017-01-10 16:03:04		-2.06	-2.295	-0.04	-0.025	-0.02	-0.188																-0.506	-0.05	-0.04	-0.025	-0.02	-0.188
2017-01-10 17:02:46		-1.992	-2.117	-0.05	-0.025	-0.03	-0.188																-0.694	-0.275	-0.05	-0.025	-0.03	-0.188
2017-01-10 18:02:44		-1.511	-2.016	-0.04	-0.025	-0.03	-0.188																-0.788	-0.125	-0.04	-0.025	-0.03	-0.188
2017-01-10 19:02:49		-1.099	-2.219	-0.03	-0.025	-0.03	-0.188																-0.788	-0.2	-0.03	-0.025	-0.03	-0.188
2017-01-10 20:02:50		-1.167	-2.726	-0.03	-0.025	-0.02	-0.188																-0.788	-0.05	-0.03	-0.025	-0.02	-0.188
2017-01-10 21:02:47		-1.03	-3.626	-0.04	-0.025	-0.03	-0.125																-0.788	-0.05	-0.04	-0.025	-0.03	-0.125
2017-01-10 22:02:43		-1.442	-4.501	-0.05	-0.025	-0.03	-0.188																-0.694	-0.125	-0.05	-0.025	-0.03	-0.188
2017-01-10 23:02:43		-1.579	-5.109	-0.04	-0.031	-0.04	-0.188																-0.694	-0.275	-0.04	-0.031	-0.04	-0.188
2017-01-11 00:02:43		-1.785	-5.249	-0.04	-0.031	-0.04	-0.25																-0.6	-0.275	-0.04	-0.031	-0.04	-0.25
2017-01-11 01:02:45		-1.923	-5.173	-0.04	-0.031	-0.04	-0.188																-0.6	-0.35	-0.04	-0.031	-0.04	-0.188
2017-01-11 02:02:48		-2.129	-5.046	-0.04	-0.031	-0.03	-0.188																-0.506	-0.5	-0.04	-0.031	-0.03	-0.188
2017-01-11 03:02:44		-1.992	-4.792	-0.05	-0.031	-0.04	-0.188																-0.6	-0.575	-0.05	-0.031	-0.04	-0.188
2017-01-11 04:02:44		-2.266	-4.501	-0.04	-0.038	-0.04	-0.188																-0.6	-0.8	-0.04	-0.038	-0.04	-0.188
2017-01-11 05:02:44		-2.266	-4.349	-0.05	-0.031	-0.04	-0.188																-0.6	-1.1	-0.05	-0.031	-0.04	-0.188
2017-01-11 06:02:47		-2.404	-4.26	-0.05	-0.031	-0.03	-0.25																-0.694	-1.325	-0.05	-0.031	-0.03	-0.25
2017-01-11 07:02:47		-2.472	-4.184	-0.06	-0.031	-0.04	-0.25																-0.788	-1.55	-0.06	-0.031	-0.04	-0.25
2017-01-11 08:02:58		-2.404	-4.108	-0.07	-0.031	-0.03	-0.188																-0.788	-2	-0.07	-0.031	-0.03	-0.188
2017-01-11 09:02:42		-1.648	-3.93	-0.06	-0.038	-0.04	-0.188																-0.975	-2.225	-0.06	-0.038	-0.04	-0.188
2017-01-11 10:02:51		-1.099	-3.613	-0.06	-0.031	-0.03	-0.188																-0.788	-2.6	-0.06	-0.031	-0.03	-0.188
2017-01-11 11:02:54		-0.755	-3.334	-0.07	-0.031	-0.03	-0.188																-0.694	-2.75	-0.07	-0.031	-0.03	-0.188
2017-01-11 12:04:05		-0.618	-3.144	-0.06	-0.031	-0.03	-0.188																-0.694	-2.75	-0.06	-0.031	-0.03	-0.188
2017-01-11 13:02:26		-0.412	-3.068	-0.06	-0.031	-0.03	-0.188																-0.6	0.175	-0.06	-0.031	-0.03	-0.188
2017-01-11 14:02:47		-0.412	-3.132	-0.06	-0.038	-0.04	-0.188																-0.694	0.025	-0.06	-0.038	-0.04	-0.188
2017-01-11 15:03:21		-0.618	-3.144	-0.07	-0.031	-0.04	-0.188																-0.694	0.25	-0.07	-0.031	-0.04	-0.188
2017-01-11 16:02:46		-0.824	-3.005	-0.07	-0.031	-0.06	-0.125																-0.694	-0.875	-0.07	-0.031	-0.06	-0.125
2017-01-11 17:02:45		-0.618	-2.878	-0.06	-0.038	-0.03	-0.188																-0.694	0.138	-0.06	-0.038	-0.03	-0.188
2017-01-11 18:02:50		-0.137	-2.979	-0.07	-0.031	-0.03	-0.188																-0.694	0.138	-0.07	-0.031	-0.03	-0.188
2017-01-11 19:02:42		0.137	-2.916	-0.08	-0.031	-0.03	-0.188																-0.6	0.16	-0.08	-0.031	-0.03	-0.188
2017-01-11 20:02:50		0.481	-2.599	-0.06	-0.038	-0.03	-0.188																-0.6	0.175	-0.06	-0.038	-0.03	-0.188
2017-01-11 21:02:49		0.618	-2.016	-0.06	-0.038	-0.04	-0.188																-0.6	0.198	-0.06	-0.038	-0.04	-0.188
2017-01-11 22:02:46		0.618	-1.547	-0.06	-0.038	-0.05	-0.188																-0.788	-1.55	-0.06	-0.038	-0.05	-0.188
2017-01-11 23:02:46		0.893	-1.166	-0.07	-0.031	-0.03	-0.125																-0.506	-1.475	-0.07	-0.031	-0.03	-0.125
2017-01-12 00:02:46		1.099	-0.824	-0.08	-0.031	-0.03	-0.188																-0.506	-1.325	-0.08	-0.031	-0.03	-0.188
2017-01-12 01:02:47		1.236	-0.558	-0.08	-0.031	-0.03	-0.188																-0.413	-1.25	-0.08	-0.031	-0.03	-0.188
2017-01-12 02:02:47		1.442	-0.33	-0.07	-0.031	-0.03	-0.188																-0.413	-1.025	-0.07	-0.031	-0.03	-0.188
2017-01-12 03:02:43		1.511	-0.038	-0.06	-0.038	-0.02	-0.188																-0.319	-0.95	-0.06	-0.038	-0.02	-0.188
2017-01-12 04:02:44		1.579	0.203	-0.08	-0.031	-0.02	-0.188																-0.319	-0.8	-0.08	-0.031	-0.02	-0.188
2017-01-12 05:02:44		1.648	0.38	-0.07	-0.031	-0.03	-0.188																-0.319	-0.725	-0.07	-0.031	-0.03	-0.188
2017-01-12 06:02:44		1.717	0.558	-0.06	-0.031	-0.04	-0.125																-0.225	-0.65	-0.06	-0.031	-0.04	-0.125
2017-01-12 07:02:45		1.648	0.659	-0.05	-0.038	-0.02	-0.188																-0.413	-0.65	-0.05	-0.038	-0.02	-0.188
2017-01-12 08:02:48		1.373	0.634	-0.06	-0.038	-0.04	-0.188																-0.225	-0.65	-0.06	-0.038	-0.04	-0.188
2017-01-12 09:02:52		0.687	0.659	-0.06	-0.031	-0.02	-0.25																0.244	-0.8	-0.06	-0.031	-0.02	-0.25
2017-01-12 10:02:46		0.481	0.634	-0.06	-0.031	-0.04	-0.188																0.056	-0.575	-0.06	-0.031	-0.04	-0.188
2017-01-12 11:04:57		0.412	0.621	-0.05	-0.031	-0.03	-0.188																-0.038	-0.575	-0.05	-0.031	-0.03	-0.188
2017-01-12 12:03:04		0.275	0.571	-0.07	-0.031	-0.04	-0.188																-0.038	-0.5	-0.07	-0.031	-0.04	-0.188
2017-01-12 13:02:49		0.343	0.697	-0.07	-0.031	-0.04	-0.188																-0.038	-0.425	-0.07	-0.031	-0.04	-0.188
2017-01-12 14:02:54		0.481	1.192	-0.05	-0.025	-0.03	-0.188																-0.038	-0.275	-0.05	-0.025	-0.03	-0.188
2017-01-12 16:02:45		0.549	1.712	-0.06	-0.025	-0.04	-0.188																-0.038	-0.35	-0.06	-0.025	-0.04	-0.188
2017-01-12 16:02:45		0.481	1.914	-0.05	-0.031	-0.02	-0.25																0.056	-0.425	-0.05	-0.031	-0.02	-0.25
2017-01-12 17:02:52		0.481	2.244	-0.05	-0.025	-0.05	-0.188																0.056	-0.35	-0.05	-0.025	-0.05	-0.188
2017-01-12 18:02:46		0.343	2.612	-0.05	-0.025	-0.04	-0.188																-0.038	-0.2	-0.05	-0.025	-0.04	-0.188
2017-01-12 19:03:16		0.206	2.713	-0.05	-0.025	-0.04	-0.188																0.056	-0.275	-0.05	-0.025	-0.04	-0.188
2017-01-12 20:03:00		0.275	2.84	-0.05	-0.025	-0.05	-0.188																-0.038	-0.2	-0.05	-0.025	-0.05	-0.188
2017-01-12 21:02:46		0.412	3.157	-0.04	-0.025	-0.03	-0.188																0.15	-0.2	-0.04	-0.025	-0.03	-0.188
2017-01-12 22:02:42		0.755	3.765	-0.05	-0.025	-0.01	-0.25																0.338	-0.125	-0.05	-0.025	-0.01	-0.25
2017-01-12 23:02:46		0.687	4.437	-0.03	-0.025	-0.02	-0.25																0.15	0.025	-0.03	-0.025	-0.02	-0.25
2017-01-13 00:02:44		0.824	4.881	-0.03	-0.025	-0.03	-0.188																0.244	0.025	-0.03	-0.025	-0.03	-0.188
2017-01-13 01:02:43		0.893	5.262	-0.02	-0.025	-0.02	-0.188																0.244	0.175	-0.02	-0.025	-0.02	-0.188
2017-01-13 02:02:50		1.03	5.578	-0.03	-0.025	-0.03	-0.188																0.244	0.325	-0.03	-0.025	-0.03	-0.188
2017-01-13 03:03:02		1.236	5.921	-0.03	-0.019	-0.03	-0.188																0.244	0.55	-0.03	-0.019	-0.03	-0.188
2017-01-13 04:02:43		1.373	6.149	-0.02	-0.019	-0.03	-0.188																0.338	0.55	-0.02	-0.019	-0.03	-0.188
2017-01-13 05:02:46		1.579	6.365	-0.02	-0.019	-0.02	-0.188																0.338	0.775	-0.02	-0.019	-0.02	-0.188
2017-01-13 06:02:46		1.717	6.504	-0.02	-0.019	-0.03	-0.188																0.431	0.888	-0.02	-0.019	-0.03	-0.188
2017-01-13 07:02:46		1.923	6.605	-0.03	-0.013	-0.04	-0.188																0.713	1.075	-0.03	-0.013	-0.04	-0.188
2017-01-13 08:02:51		2.129	6.707	0	-0.013	-0.02	-0.188																0.713	1.338	0	-0.013	-0.02	-0.188
2017-01-13 09:02:44		1.854	6.466	-0.01	-0.013	-0.04	-0.188																0.525	1.563	-0.01	-0.013	-0.04	-0.188
2017-01-13 10:02:49		1.373	6.174	-0.01	-0.019	-0.03	-0.188																0.431	1.713	-0.01	-0.019	-0.03	-0.188
2017-01-13 11:02:45		1.167	6.441	-0.01	-0.019	-0.04	-0.188																0.525	1.9	-0.01	-0.019	-0.04	-0.188
2017-01-13 12:03:42		2.06	7.353	0	-0.019	-0.03	-0.188																0.619	1.975	0	-0.019	-0.03	-0.188
2017-01-13 13:03:00		3.228	7.823	-0.01	-0.013	-0.01	-0.25																0.713	1.975	-0.01	-0.013	-0.01	-0.25
2017-01-13 14:03:58		4.189	6.998	-0.01	-0.019	-0.02	-0.25																1.088	2.013	-0.01	-0.019	-0.02	-0.25
2017-01-13 15:02:55		4.944	5.553	-0.01	-0.013	-0.02	-0.188																1.556	2.125	-0.01	-0.013	-0.02	-0.188
2017-01-13 16:02:56		5.219	4.349	0	-0.006	-0.02	-0.188																2.025	2.313	0	-0.006	-0.02	-0.188
2017-01-13 17:02:46		4.876	3.423	0	-0.006	-0.02	-0.188																2.588	2.313	0	-0.006	-0.02	-0.188
2017-01-13 21:02:44		4.12	2.954	0	-0.006	-0.03	-0.188																2.869	2.275	0	-0.006	-0.03	-0.188
2017-01-13 21:02:45		3.159	2.865	0	0	-0.04	-0.188																2.775	2.238	0	0	-0.04	-0.188
2017-01-13 21:02:49		2.266	2.891	-0.01	0.013	-0.02	-0.25																2.869	2.05	-0.01	0.013	-0.02	-0.25
2017-01-13 21:02:49		1.373	2.979	0.01	0.013	-0.03	-0.188																2.494	1.9	0.01	0.013	-0.03	-0.188
2017-01-13 22:02:44		0.549	3.005	0.01	0.019	-0.04	-0.188																2.306	1.788	0.01	0.019	-0.04	-0.188
2017-01-14 00:02:45		0.275	2.903	0	0.019	-0.04	-0.188																2.025	1.6	0	0.019	-0.04	-0.188
2017-01-14 00:02:45		0.069	2.688	0.02	0.025	-0.04	-0.188																1.744	1.525	0.02	0.025	-0.04	-0.188
2017-01-14 03:02:45		-0.069	2.346	0.01	0.025	-0.05	-0.188																1.556	1.375	0.01	0.025	-0.05	-0.188
2017-01-14 03:02:45		-0.137	2.016	0.02	0.025	-0.04	-0.188																1.369	1.338	0.02	0.025	-0.04	-0.188
2017-01-14 03:02:49		-0.206	1.521	0.02	0.025	-0.04	-0.188																1.275	1.225	0.02	0.025	-0.04	-0.188
2017-01-14 04:02:46		-0.275	1.04	0.02	0.025	-0.04	-0.188																1.181	1.15	0.02	0.025	-0.04	-0.188
2017-01-14 08:02:51		-0.343	0.558	0.02	0.025	-0.05	-0.188																1.088	1.038	0.02	0.025	-0.05	-0.188
2017-01-14 08:02:51		-0.343	0.076	0.02	0.025	-0.04	-0.25																0.994	1	0.02	0.025	-0.04	-0.25
2017-01-14 08:02:56		-0.343	-0.38	0.03	0.025	-0.03	-0.188																0.994	0.888	0.03	0.025	-0.03	-0.188
2017-01-14 08:02:56		-0.343	-0.723	0.02	0.025	-0.04	-0.188																0.806	0.925	0.02	0.025	-0.04	-0.188
2017-01-14 09:02:43		-0.206	-0.761	0.02	0.025	-0.03	-0.188																0.806	0.925	0.02	0.025	-0.03	-0.188
2017-01-14 11:02:43		0	-0.634	0.02	0.031	-0.03	-0.188																0.806	0.925	0.02	0.031	-0.03	-0.188
2017-01-14 11:02:43		0	-0.621	0.02	0.031	-0.02	-0.25																0.806	0.85	0.02	0.031	-0.02	-0.25
2017-01-14 20:02:49		-0.893	-0.609	0.01	0.031	-0.02	-0.25																0.713	0.85	0.01	0.031	-0.02	-0.25
2017-01-14 20:02:49		-0.549	-0.342	0.02	0.025	-0.05	-0.188																0.713	0.813	0.02	0.025	-0.05	-0.188
2017-01-14 20:02:53		-0.137	-0.355	0.01	0.031	-0.03	-0.125																0.806	0.813	0.01	0.031	-0.03	-0.125
2017-01-14 20:02:53		0.618	-0.279	0.02	0.025	-0.03	-0.188																0.994	0.925	0.02	0.025	-0.03	-0.188
2017-01-14 20:02:57		0.755	-0.266	0	0.025	-0.04	-0.188																1.181	0.925	0	0.025	-0.04	-0.188
2017-01-14 20:02:57		1.099	-0.216	0.01	0.025	-0.03	-0.188																1.181	1	0.01	0.025	-0.03	-0.188
2017-01-14 20:03:02		1.373	-0.152	0.01	0.031	-0.03	-0.188																1.369	1.038	0.01	0.031	-0.03	-0.188
2017-01-14 20:03:02		1.305	-0.139	0.02	0.031	-0.02	-0.188																1.556	1.038	0.02	0.031	-0.02	-0.188
2017-01-14 20:03:06		1.305	-0.139	0.03	0.031	-0.03	-0.125																1.463	1.113	0.03	0.031	-0.03	-0.125
2017-01-14 21:02:43		1.992	-0.063	0.01	0.038	-0.02	-0.188																1.65	1.113	0.01	0.038	-0.02	-0.188
2017-01-14 22:02:43		2.678	0.038	0.03	0.038	-0.02	-0.125																1.744	1.15	0.03	0.038	-0.02	-0.125
2017-01-14 23:02:43		3.022	0.165	0.04	0.038	-0.02	-0.125																1.931	1.263	0.04	0.038	-0.02	-0.125
2017-01-15 00:02:43		3.159	0.393	0.04	0.038	-0.01	-0.125																2.025	1.263	0.04	0.038	-0.01	-0.125
2017-01-15 02:02:48		3.365	0.723	0.03	0.044	-0.01	-0.125																2.213	1.338	0.03	0.044	-0.01	-0.125
2017-01-15 02:02:48		3.365	1.141	0.04	0.05	0	-0.188																2.4	1.338	0.04	0.05	0	-0.188
2017-01-15 03:02:45		3.434	1.61	0.04	0.05	-0.01	-0.188																2.494	1.375	0.04	0.05	-0.01	-0.188
2017-01-15 04:02:44		3.502	2.168	0.04	0.056	-0.02	-0.125																2.588	1.413	0.04	0.056	-0.02	-0.125
2017-01-15 05:02:44		3.365	2.751	0.05	0.056	0	-0.188																2.681	1.45	0.05	0.056	0	-0.188
2017-01-15 06:02:45		3.434	3.36	0.05	0.063	-0.01	-0.125																2.775	1.45	0.05	0.063	-0.01	-0.125
2017-01-15 15:02:45		3.434	4.006	0.05	0.063	-0.02	-0.125																2.681	1.488	0.05	0.063	-0.02	-0.125
2017-01-15 15:02:45		3.434	4.577	0.05	0.063	-0.01	-0.125																2.869	1.45	0.05	0.063	-0.01	-0.125
2017-01-15 15:02:50		3.228	4.78	0.07	0.063	0	-0.125																2.869	1.488	0.07	0.063	0	-0.125
2017-01-15 15:02:50		3.228	4.501	0.06	0.069	-0.01	-0.125																2.869	1.413	0.06	0.069	-0.01	-0.125
2017-01-15 15:02:54		3.09	3.575	0.06	0.069	-0.03	-0.063																2.869	1.413	0.06	0.069	-0.03	-0.063
2017-01-15 15:02:54		2.953	1.876	0.07	0.069	-0.03	-0.063																2.963	1.338	0.07	0.069	-0.03	-0.063
2017-01-15 15:02:58		1.648	0.152	0.07	0.075	-0.01	-0.063																2.963	1.3	0.07	0.075	-0.01	-0.063
2017-01-15 15:02:58		1.099	-0.393	0.08	0.075	-0.03	-0.125																2.775	1.263	0.08	0.075	-0.03	-0.125
2017-01-15 15:03:03		0	-0.545	0.07	0.081	-0.03	-0.063																2.494	1.075	0.07	0.081	-0.03	-0.063
2017-01-15 16:02:49		-0.343	-0.558	0.09	0.081	-0.02	-0.063																2.119	1	0.09	0.081	-0.02	-0.063
2017-01-15 17:02:57		-0.549	-0.571	0.08	0.088	-0.01	-0.063																1.838	0.85	0.08	0.088	-0.01	-0.063
2017-01-15 18:02:54		-0.618	-0.571	0.08	0.081	-0.01	-0.063																1.65	0.775	0.08	0.081	-0.01	-0.063
2017-01-15 19:02:48		-0.549	-0.545	0.09	0.081	-0.01	-0.063																1.369	0.738	0.09	0.081	-0.01	-0.063
2017-01-15 20:02:54		-0.618	-0.532	0.09	0.081	0	-0.125																1.181	0.625	0.09	0.081	0	-0.125
2017-01-15 21:02:45		-1.099	-0.609	0.08	0.081	0	-0.125																0.994	0.588	0.08	0.081	0	-0.125
2017-01-15 22:02:46		-1.854	-0.659	0.09	0.075	-0.02	-0.063																0.806	0.513	0.09	0.075	-0.02	-0.063
2017-01-15 23:02:42		-2.129	-0.735	0.07	0.081	-0.01	-0.063																0.525	0.4	0.07	0.081	-0.01	-0.063
2017-01-16 00:02:45		-2.472	-0.811	0.07	0.075	-0.02	-0.063																0.338	0.363	0.07	0.075	-0.02	-0.063
2017-01-16 01:02:45		-2.747	-0.951	0.08	0.069	-0.02	-0.125																0.056	0.25	0.08	0.069	-0.02	-0.125
2017-01-16 02:02:49		-2.816	-1.154	0.07	0.063	-0.03	0																-0.225	0.138	0.07	0.063	-0.03	0
2017-01-16 03:02:42		-2.953	-1.395	0.06	0.063	-0.02	0																-0.413	0.063	0.06	0.063	-0.02	0
2017-01-16 04:02:46		-2.678	-1.572	0.07	0.056	0	-0.063																-0.506	0.025	0.07	0.056	0	-0.063
2017-01-16 05:02:46		-2.472	-1.547	0.06	0.056	-0.01	0																-0.694	-0.013	0.06	0.056	-0.01	0
2017-01-16 06:02:46		-2.472	-1.433	0.06	0.044	0.01	-0.063																-0.881	-0.013	0.06	0.044	0.01	-0.063
2017-01-16 07:02:46		-2.335	-1.319	0.05	0.044	0	-0.063																-0.881	0.025	0.05	0.044	0	-0.063
2017-01-16 08:02:50		-2.266	-1.128	0.05	0.038	0	0																-0.975	0.025	0.05	0.038	0	0
2017-01-16 09:02:43		-2.129	-0.926	0.04	0.038	-0.01	0																-1.069	-0.013	0.04	0.038	-0.01	0
2017-01-16 10:02:43		-2.06	-0.647	0.03	0.031	-0.01	0																-1.069	-0.013	0.03	0.031	-0.01	0
2017-01-16 11:02:44		-1.373	-0.444	0.03	0.025	0.01	0																-1.069	-0.013	0.03	0.025	0.01	0
2017-01-16 12:02:43		-0.961	-0.342	0.02	0.025	0	0																-0.975	0.025	0.02	0.025	0	0
2017-01-16 13:02:43		-0.893	-0.368	0.02	0.013	-0.01	0																-0.788	0.063	0.02	0.013	-0.01	0
2017-01-16 14:02:48		-1.442	-0.431	0.01	0.013	0.01	0																-0.788	0.063	0.01	0.013	0.01	0
2017-01-16 15:02:44		-1.579	-0.456	0.01	0.006	0.01	0																-0.788	-0.013	0.01	0.006	0.01	0
2017-01-16 16:02:43		-1.579	-0.456	-0.01	0.013	0.01	0																-0.788	-0.013	-0.01	0.013	0.01	0
2017-01-16 17:02:43		-1.236	-0.393	0	0.006	0.01	0																-0.788	0.025	0	0.006	0.01	0
2017-01-16 18:02:46		-0.549	-0.266	0	0.006	0.02	0																-0.788	0.1	0	0.006	0.02	0
2017-01-16 19:02:43		0.343	-0.139	-0.01	0	0.02	0																-0.6	0.175	-0.01	0	0.02	0
2017-01-16 20:02:48		1.099	-0.025	-0.01	0	0.01	0.063																-0.319	0.325	-0.01	0	0.01	0.063
2017-01-16 21:02:44		1.442	0.025	0	0	0.01	0.063																-0.038	0.438	0	0	0.01	0.063
2017-01-16 22:02:45		1.442	-0.025	-0.02	0	0.03	0																0.15	0.475	-0.02	0	0.03	0
2017-01-16 23:02:44		1.236	0	-0.01	0	0.02	0																0.338	0.55	-0.01	0	0.02	0
2017-01-17 00:02:44		1.373	0.063	-0.01	0	0.03	0																0.431	0.588	-0.01	0	0.03	0
2017-01-17 01:02:44		1.305	0.177	-0.01	0	0.03	0.063																0.525	0.625	-0.01	0	0.03	0.063
2017-01-17 02:02:48		1.442	0.393	-0.01	0	0.03	0																0.619	0.7	-0.01	0	0.03	0
2017-01-17 03:02:45		1.717	0.697	-0.01	0.006	0.04	0																0.713	0.738	-0.01	0.006	0.04	0
2017-01-17 04:02:44		1.717	0.938	-0.01	0.006	0.02	0																0.713	0.738	-0.01	0.006	0.02	0
2017-01-17 05:02:45		1.785	0.938	-0.01	0	0.03	0																0.9	0.775	-0.01	0	0.03	0
2017-01-17 06:02:45		1.854	0.862	-0.01	0.013	0.01	0.125																1.088	0.775	-0.01	0.013	0.01	0.125
2017-01-17 07:02:45		1.854	0.761	0	0.006	0.02	0.063																1.181	0.775	0	0.006	0.02	0.063
2017-01-17 08:02:50		1.717	0.583	0.01	0.013	0.03	0																1.181	0.813	0.01	0.013	0.03	0
2017-01-17 09:02:48		1.579	0.38	0	0.013	0.02	0.063																1.275	1.225	0	0.013	0.02	0.063
2017-01-17 10:02:48		1.579	0.114	0.01	0.013	0.02	0.063																1.369	1.225	0.01	0.013	0.02	0.063
2017-01-17 11:03:22		1.511	0.025	0.01	0.019	0.02	0																1.369	1.225	0.01	0.019	0.02	0
2017-01-17 12:03:05		1.923	0.063	0.02	0.019	0.03	0.063																1.369	1.3	0.02	0.019	0.03	0.063
2017-01-17 13:02:56		2.198	0.101	0.03	0.025	0.04	0																1.463	1.375	0.03	0.025	0.04	0
2017-01-17 14:02:59		2.404	0.127	0.02	0.031	0.02	0.063																1.65	1.45	0.02	0.031	0.02	0.063
2017-01-17 15:02:59		2.335	0.127	0.03	0.031	0.03	0																1.744	1.6	0.03	0.031	0.03	0
2017-01-17 16:02:42		2.266	0.114	0.03	0.025	0.03	0																1.838	1.525	0.03	0.025	0.03	0
2017-01-17 17:02:49		1.992	0.076	0.03	0.031	0.01	0.063																1.838	1.6	0.03	0.031	0.01	0.063
2017-01-17 18:02:44		1.717	0.025	0.03	0.031	0.03	0																1.838	1.45	0.03	0.031	0.03	0
2017-01-17 19:02:58		1.648	0.013	0.03	0.044	0.02	0.063																1.838	1.45	0.03	0.044	0.02	0.063
2017-01-17 20:02:47		1.442	-0.013	0.04	0.038	0.01	0.063																1.744	1.45	0.04	0.038	0.01	0.063
2017-01-17 21:02:43		1.099	-0.051	0.04	0.038	0.02	0.063																1.65	1.3	0.04	0.038	0.02	0.063
2017-01-17 22:02:46		1.442	0	0.05	0.044	0.02	0.063																1.65	1.375	0.05	0.044	0.02	0.063
2017-01-17 23:02:42		1.923	0.076	0.05	0.044	0.02	0.063																1.65	1.375	0.05	0.044	0.02	0.063
2017-01-18 00:02:44		2.129	0.101	0.04	0.05	0.02	0.063																1.744	1.3	0.04	0.05	0.02	0.063
2017-01-18 01:02:43		2.472	0.165	0.05	0.05	0.02	0.063																1.838	1.45	0.05	0.05	0.02	0.063
2017-01-18 02:02:50		2.335	0.139	0.05	0.05	0.02	0.063																1.931	1.45	0.05	0.05	0.02	0.063
2017-01-18 03:02:43		1.854	0.025	0.06	0.05	0	0.063																1.931	1.525	0.06	0.05	0	0.063
2017-01-18 04:02:43		1.03	-0.076	0.06	0.05	0.02	0.063																1.931	1.45	0.06	0.05	0.02	0.063
2017-01-18 05:02:44		0.343	-0.165	0.06	0.056	0.01	0.063																1.744	1.3	0.06	0.056	0.01	0.063
2017-01-18 06:02:44		0.069	-0.228	0.06	0.05	0.01	0																1.556	1.15	0.06	0.05	0.01	0
2017-01-18 07:02:45		-0.206	-0.241	0.06	0.056	0.02	0.063																1.275	1.15	0.06	0.056	0.02	0.063
2017-01-18 08:02:48		-0.206	-0.254	0.05	0.056	0.02	0.063																1.088	1	0.05	0.056	0.02	0.063
2017-01-18 09:02:44		-0.069	-0.228	0.05	0.056	0.03	0																0.994	0.85	0.05	0.056	0.03	0
2017-01-18 10:02:48		0.343	-0.165	0.06	0.056	0.03	0																0.806	0.85	0.06	0.056	0.03	0
2017-01-18 11:02:51		0.687	-0.101	0.06	0.056	0.02	0.063																0.806	0.85	0.06	0.056	0.02	0.063
2017-01-18 12:02:44		0.961	-0.063	0.05	0.05	0.03	0																0.994	0.925	0.05	0.05	0.03	0
2017-01-18 13:03:14		1.579	0.051	0.04	0.05	0.02	0.063																1.088	1.075	0.04	0.05	0.02	0.063
2017-01-18 14:03:26		2.198	0.114	0.05	0.044	0.03	0.063																1.181	1.3	0.05	0.044	0.03	0.063
2017-01-18 15:02:44		2.541	0.165	0.04	0.05	0.03	0.063																1.463	1.525	0.04	0.05	0.03	0.063
2017-01-18 16:02:46		2.61	0.152	0.06	0.05	0.03	0.063																1.556	1.675	0.06	0.05	0.03	0.063
2017-01-18 17:02:45		2.266	0.076	0.05	0.05	0.04	0.063																1.744	1.6	0.05	0.05	0.04	0.063
2017-01-18 18:03:01		1.442	-0.076	0.05	0.05	0.02	0.063																1.744	1.525	0.05	0.05	0.02	0.063
2017-01-18 19:02:41		0.481	-0.216	0.07	0.044	0.01	0.063																1.556	1.3	0.07	0.044	0.01	0.063
2017-01-18 20:02:48		-0.412	-0.33	0.04	0.056	0.04	0																1.369	1	0.04	0.056	0.04	0
2017-01-18 21:02:44		-0.755	-0.38	0.06	0.056	0.01	0.063																1.088	0.85	0.06	0.056	0.01	0.063
2017-01-18 22:02:44		-1.167	-0.418	0.05	0.05	0.02	0.063																0.806	0.55	0.05	0.05	0.02	0.063
2017-01-18 23:02:44		-1.923	-0.507	0.06	0.05	0.01	0.063																0.619	0.325	0.06	0.05	0.01	0.063
2017-01-19 00:02:42		-2.404	-0.583	0.06	0.044	0.02	0.063																0.244	0.175	0.06	0.044	0.02	0.063
2017-01-19 01:02:45		-2.816	-0.659	0.04	0.05	0.02	0.063																-0.038	-0.05	0.04	0.05	0.02	0.063
2017-01-19 02:02:49		-3.159	-0.685	0.05	0.044	0.02	0.063																-0.319	-0.2	0.05	0.044	0.02	0.063
2017-01-19 03:02:47		-2.953	-0.685	0.04	0.044	0.03	0.063																-0.6	-0.425	0.04	0.044	0.03	0.063
2017-01-19 04:02:45		-2.678	-0.761	0.03	0.038	0.02	0.063																-0.788	-0.575	0.03	0.038	0.02	0.063
2017-01-19 05:02:48		-2.266	-0.9	0.02	0.038	0.02	0.063																-0.881	-0.5	0.02	0.038	0.02	0.063
2017-01-19 06:02:46		-1.992	-1.09	0.02	0.031	0.03	0.063																-0.881	-0.575	0.02	0.031	0.03	0.063
2017-01-19 07:02:45		-1.648	-1.116	0.01	0.025	0.01	0.125																-0.788	-0.575	0.01	0.025	0.01	0.125
2017-01-19 08:02:53		-1.442	-1.04	0.01	0.025	0.01	0.063																-0.788	-0.575	0.01	0.025	0.01	0.063
2017-01-19 09:02:42		-1.579	-0.913	0.01	0.019	0.02	0.063																-0.788	-0.425	0.01	0.019	0.02	0.063
2017-01-19 10:03:04		-1.923	-0.685	0.01	0.013	0.02	0.063																-0.788	-0.425	0.01	0.013	0.02	0.063
2017-01-19 11:02:57		-2.198	-0.52	0	0.013	0.01	0.125																-0.881	-0.575	0	0.013	0.01	0.125
2017-01-19 12:02:45		-2.335	-0.532	0	0.013	0.01	0.125																-1.069	-0.725	0	0.013	0.01	0.125
2017-01-19 13:02:34		-1.923	-0.456	0	0.006	0.02	0.125																-1.163	-0.65	0	0.006	0.02	0.125
2017-01-19 14:04:10		-1.854	-0.431	-0.02	0.006	0.02	0.063																-1.163	-0.8	-0.02	0.006	0.02	0.063
2017-01-19 15:03:20		-1.785	-0.418	-0.01	0	0.01	0.125																-1.163	-0.8	-0.01	0	0.01	0.125
2017-01-19 17:02:29		-1.717	-0.393	-0.03	0	0.01	0.125																-1.069	-0.8	-0.03	0	0.01	0.125
2017-01-19 17:02:29		-1.373	-0.317	-0.02	-0.006	0.02	0.063																-1.069	-0.725	-0.02	-0.006	0.02	0.063
2017-01-19 18:02:49		-0.755	-0.228	-0.02	-0.006	0.01	0.125																-1.069	-0.5	-0.02	-0.006	0.01	0.125
2017-01-19 19:03:04		-0.206	-0.139	-0.04	-0.006	0.04	0.063																-0.788	-0.35	-0.04	-0.006	0.04	0.063
2017-01-19 20:02:57		0.687	-0.038	-0.02	-0.013	0.02	0.125																-0.6	-0.05	-0.02	-0.013	0.02	0.125
2017-01-19 21:02:52		1.373	0.076	-0.04	-0.013	0.04	0.063																-0.319	0.175	-0.04	-0.013	0.04	0.063
2017-01-19 22:02:46		1.923	0.127	-0.02	-0.013	0.02	0.063																-0.038	0.475	-0.02	-0.013	0.02	0.063
2017-01-19 23:02:48		2.404	0.165	-0.03	-0.013	0.04	0.063																0.244	0.625	-0.03	-0.013	0.04	0.063
2017-01-20 00:02:43		2.541	0.203	-0.02	-0.006	0.03	0.063																0.525	0.925	-0.02	-0.006	0.03	0.063
2017-01-20 01:02:46		2.61	0.203	-0.01	-0.013	0.03	0.125																0.806	0.925	-0.01	-0.013	0.03	0.125
2017-01-20 02:02:51		2.816	0.216	-0.02	0	0.03	0.125																0.994	1.075	-0.02	0	0.03	0.125
2017-01-20 03:02:44		2.884	0.292	-0.01	-0.006	0.03	0.125																1.181	1.225	-0.01	-0.006	0.03	0.125
2017-01-20 04:02:43		3.09	0.418	-0.01	0	0.04	0.063																1.369	1.375	-0.01	0	0.04	0.063
2017-01-20 05:02:44		3.09	0.621	0	0	0.03	0.125																1.556	1.375	0	0	0.03	0.125
2017-01-20 06:02:44		2.953	0.862	0	0.006	0.04	0.125																1.65	1.45	0	0.006	0.04	0.125
2017-01-20 07:02:44		2.884	0.887	0.01	0.013	0.04	0.063																1.744	1.45	0.01	0.013	0.04	0.063
2017-01-20 08:02:48		2.747	0.849	0.01	0.013	0.03	0.125																1.838	1.525	0.01	0.013	0.03	0.125
2017-01-20 09:02:41		2.816	0.697	0.02	0.019	0.02	0.125																1.931	1.525	0.02	0.019	0.02	0.125
2017-01-20 10:02:45		2.61	0.38	0.01	0.025	0.03	0.125																2.025	1.525	0.01	0.025	0.03	0.125
2017-01-20 11:02:44		1.992	0.063	0.02	0.025	0.04	0.063																2.025	1.675	0.02	0.025	0.04	0.063
2017-01-20 12:02:51		1.03	-0.089	0.04	0.025	0.03	0.063																1.931	1.6	0.04	0.025	0.03	0.063
2017-01-20 13:03:22		-0.755	-0.38	0.03	0.031	0.02	0.063																1.65	1.15	0.03	0.031	0.02	0.063
2017-01-20 14:03:15		-2.198	-0.558	0.04	0.038	0.02	0.063																1.181	0.775	0.04	0.038	0.02	0.063
2017-01-20 15:04:06		-3.022	-0.672	0.05	0.038	0.02	0.125																0.525	0.325	0.05	0.038	0.02	0.125
2017-01-20 16:02:52		-3.159	-0.672	0.05	0.031	0.02	0.125																-0.038	0.025	0.05	0.031	0.02	0.125
2017-01-20 17:02:41		-2.953	-0.634	0.04	0.038	0.02	0.125																-0.413	-0.2	0.04	0.038	0.02	0.125
2017-01-20 18:02:46		-2.472	-0.52	0.03	0.038	0.03	0.125																-0.6	-0.35	0.03	0.038	0.03	0.125
2017-01-20 19:02:46		-1.923	-0.431	0.04	0.031	0.01	0.125																-0.788	-0.35	0.04	0.031	0.01	0.125
2017-01-20 22:02:45		-1.717	-0.38	0.03	0.025	0.03	0.063																-0.788	-0.425	0.03	0.025	0.03	0.063
2017-01-20 22:02:45		-1.442	-0.355	0.03	0.019	0.02	0.125																-0.694	-0.425	0.03	0.019	0.02	0.125
2017-01-20 22:02:50		-1.236	-0.304	0.01	0.019	0.04	0.063																-0.694	-0.35	0.01	0.019	0.04	0.063
2017-01-20 23:02:45		-1.03	-0.266	0.01	0.019	0.03	0.125																-0.694	-0.2	0.01	0.019	0.03	0.125
2017-01-21 01:02:45		-0.687	-0.228	0.01	0.006	0.02	0.125																-0.506	-0.275	0.01	0.006	0.02	0.125
2017-01-21 01:02:45		-0.412	-0.177	-0.01	0.013	0.03	0.063																-0.506	-0.05	-0.01	0.013	0.03	0.063
2017-01-21 04:02:45		-0.206	-0.165	-0.01	0.006	0.03	0.063																-0.319	-0.05	-0.01	0.006	0.03	0.063
2017-01-21 04:02:45		-0.275	-0.177	-0.01	0.006	0.02	0.063																-0.225	0.025	-0.01	0.006	0.02	0.063
2017-01-21 04:02:49		-0.275	-0.177	0	0.006	0.02	0.125																-0.225	0.1	0	0.006	0.02	0.125
2017-01-21 05:02:45		-0.275	-0.165	-0.01	0.006	0.03	0.063																-0.131	0.1	-0.01	0.006	0.03	0.063
2017-01-21 06:02:48		-0.275	-0.177	-0.01	0.006	0.02	0.063																-0.131	0.25	-0.01	0.006	0.02	0.063
2017-01-21 07:02:48		-0.481	-0.19	0	0	0.02	0.063																-0.131	0.25	0	0	0.02	0.063
2017-01-21 11:02:52		-0.549	-0.228	0	0	0.01	0.125																-0.131	0.175	0	0	0.01	0.125
2017-01-21 11:02:52		-0.755	-0.241	-0.01	0	0.03	0.063																-0.225	0.1	-0.01	0	0.03	0.063
2017-01-21 11:02:56		-0.824	-0.241	-0.01	0	0.02	0.125																-0.225	0.1	-0.01	0	0.02	0.125
2017-01-21 11:02:56		-0.343	-0.165	-0.01	0	0.02	0.125																-0.225	0.025	-0.01	0	0.02	0.125
2017-01-21 13:02:49		0.549	-0.025	-0.02	0.006	0.03	0.063																-0.131	0.1	-0.02	0.006	0.03	0.063
2017-01-21 13:02:49		1.373	0.089	0.01	0	0.02	0.125																0.056	-0.075	0.01	0	0.02	0.125
2017-01-21 15:02:49		1.854	0.127	0	0	0.03	0.125																0.338	0.15	0	0	0.03	0.125
2017-01-21 15:02:49		2.335	0.19	-0.01	0	0.03	0.063																0.713	0.3	-0.01	0	0.03	0.063
2017-01-21 21:02:49		1.923	0.114	-0.01	0.006	0.03	0.063																0.9	0.45	-0.01	0.006	0.03	0.063
2017-01-21 21:02:50		1.373	0.038	0	0	0.03	0.063																0.994	0.45	0	0	0.03	0.063
2017-01-21 21:02:54		0.961	-0.051	0	0.006	0.03	0.063																0.994	0.45	0	0.006	0.03	0.063
2017-01-21 21:02:54		0.481	-0.101	0	0.006	0.02	0.063																0.994	0.375	0	0.006	0.02	0.063
2017-01-21 21:02:58		0.206	-0.165	0.01	0.006	0	0.125																0.9	0.375	0.01	0.006	0	0.125
2017-01-21 21:02:58		-0.275	-0.216	0.01	0.013	0.03	0.063																0.713	0.3	0.01	0.013	0.03	0.063
2017-01-21 22:02:50		-0.549	-0.254	0.01	0.019	0.02	0.125																0.525	0.15	0.01	0.019	0.02	0.125
2017-01-22 00:02:51		-0.755	-0.304	0.01	0.013	0.02	0.063																0.431	-0.075	0.01	0.013	0.02	0.063
2017-01-22 00:02:51		-1.099	-0.33	0.01	0.019	0.03	0.063																0.15	-0.15	0.01	0.019	0.03	0.063
2017-01-22 01:02:51		-1.305	-0.38	0.03	0.013	0.02	0.063																0.056	-0.3	0.03	0.013	0.02	0.063
2017-01-22 02:02:55		-1.511	-0.38	0.03	0.013	0.02	0.063																-0.131	-0.3	0.03	0.013	0.02	0.063
2017-01-22 03:02:44		-1.648	-0.406	0.03	0.013	0.04	0.063																-0.225	-0.45	0.03	0.013	0.04	0.063
2017-01-22 05:02:44		-1.717	-0.406	0.01	0.013	0.03	0.063																-0.413	-0.45	0.01	0.013	0.03	0.063
2017-01-22 05:02:44		-1.785	-0.431	0.02	0.006	0.02	0.063																-0.6	-0.525	0.02	0.006	0.02	0.063
2017-01-22 06:02:44		-1.854	-0.444	0.01	0.006	0.03	0.063																-0.694	-0.675	0.01	0.006	0.03	0.063
2017-01-22 07:02:44		-1.923	-0.444	0	0.006	0.03	0.063																-0.788	-0.75	0	0.006	0.03	0.063
2017-01-22 09:02:44		-1.992	-0.444	-0.01	0.006	0.04	0																-0.788	-0.825	-0.01	0.006	0.04	0
2017-01-22 09:02:44		-1.992	-0.456	0.01	0	0.01	0.125																-0.881	-0.825	0.01	0	0.01	0.125
2017-01-22 13:02:45		-2.129	-0.482	0	0	0.02	0																-1.069	-0.825	0	0	0.02	0
2017-01-22 13:02:45		-2.61	-0.558	-0.01	-0.006	0.01	0.063																-1.163	-0.9	-0.01	-0.006	0.01	0.063
2017-01-22 13:02:49		-3.434	-0.659	-0.01	-0.013	0.02	0.063																-1.35	-1.125	-0.01	-0.013	0.02	0.063
2017-01-22 13:02:49		-4.189	-0.773	-0.03	-0.006	0.02	0.063																-1.631	-1.35	-0.03	-0.006	0.02	0.063
2017-01-22 17:02:50		-4.464	-0.811	-0.02	-0.019	0.01	0.063																-1.913	-1.65	-0.02	-0.019	0.01	0.063
2017-01-22 17:02:50		-4.67	-0.837	-0.02	-0.019	0.01	0.063																-2.288	-1.8	-0.02	-0.019	0.01	0.063
2017-01-22 17:02:54		-3.914	-0.71	-0.03	-0.025	0.01	0.063																-2.475	-1.95	-0.03	-0.025	0.01	0.063
2017-01-22 17:02:54		-3.296	-0.621	-0.04	-0.025	0.01	0.063																-2.475	-1.875	-0.04	-0.025	0.01	0.063
2017-01-22 22:02:49		-3.09	-0.571	-0.03	-0.031	0.02	0.063																-2.475	-1.8	-0.03	-0.031	0.02	0.063
2017-01-22 22:02:50		-3.159	-0.596	-0.05	-0.038	0.03	0.063																-2.569	-1.725	-0.05	-0.038	0.03	0.063
2017-01-22 22:02:53		-3.159	-0.583	-0.06	-0.038	0.02	0.125																-2.475	-1.725	-0.06	-0.038	0.02	0.125
2017-01-22 22:02:53		-2.953	-0.571	-0.06	-0.044	0	0.063																-2.569	-1.725	-0.06	-0.044	0	0.063
2017-01-22 22:02:57		-3.09	-0.659	-0.06	-0.05	0.01	0.063																-2.475	-1.8	-0.06	-0.05	0.01	0.063
2017-01-22 23:02:48		-3.022	-0.887	-0.07	-0.05	0.01	0.063																-2.475	-1.725	-0.07	-0.05	0.01	0.063
2017-01-23 00:02:49		-2.884	-1.242	-0.08	-0.056	0.01	0.063																-2.288	-1.725	-0.08	-0.056	0.01	0.063
2017-01-23 01:02:48		-2.884	-1.661	-0.09	-0.056	0.01	0.063																-2.288	-1.725	-0.09	-0.056	0.01	0.063
2017-01-23 02:02:53		-2.61	-2.219	-0.09	-0.063	0.01	0.063																-2.288	-1.65	-0.09	-0.063	0.01	0.063
2017-01-23 03:02:43		-2.06	-2.51	-0.09	-0.063	0	0.063																-2.194	-1.65	-0.09	-0.063	0	0.063
2017-01-23 04:02:47		-1.785	-2.688	-0.08	-0.069	0	0.063																-2.006	-1.575	-0.08	-0.069	0	0.063
2017-01-23 21:02:47		-1.648	-2.84	-0.09	-0.063	0.01	0.063																-1.913	-1.5	-0.09	-0.063	0.01	0.063
2017-01-23 21:02:48		-1.579	-3.094	-0.07	-0.069	0	0.063																-1.819	-1.425	-0.07	-0.069	0	0.063
2017-01-23 21:02:51		-1.373	-3.309	-0.08	-0.069	0.01	0.063																-1.725	-1.35	-0.08	-0.069	0.01	0.063
2017-01-23 21:02:52		-1.236	-3.487	-0.08	-0.069	0	0.063																-1.725	-1.2	-0.08	-0.069	0	0.063
2017-01-23 21:02:55		-1.03	-3.537	-0.09	-0.063	0	0.063																-1.538	-1.275	-0.09	-0.063	0	0.063
2017-01-23 21:02:56		-0.893	-3.334	-0.09	-0.069	0.01	0.125																-1.444	-1.275	-0.09	-0.069	0.01	0.125
2017-01-23 21:03:00		-1.03	-2.827	-0.07	-0.069	0.02	0.063																-1.35	-1.2	-0.07	-0.069	0.02	0.063
2017-01-23 21:03:00		-1.167	-2.067	-0.08	-0.063	0	0.063																-1.444	-1.05	-0.08	-0.063	0	0.063
2017-01-23 21:03:05		-1.373	-1.23	-0.09	-0.069	0.02	0																-1.444	-1.125	-0.09	-0.069	0.02	0
2017-01-23 21:03:05		-0.755	-0.177	-0.08	-0.063	0.01	0																-1.538	-1.05	-0.08	-0.063	0.01	0
2017-01-23 21:03:10		-0.412	0.089	-0.08	-0.069	0	0.063																-1.35	-0.975	-0.08	-0.069	0	0.063
2017-01-23 21:03:10		-0.549	0.051	-0.08	-0.063	0.01	0																-1.163	-0.9	-0.08	-0.063	0.01	0
2017-01-23 21:03:13		-0.687	0	-0.08	-0.063	0.01	0																-1.163	-0.825	-0.08	-0.063	0.01	0
2017-01-23 21:03:14		-0.618	-0.013	-0.09	-0.063	0	0																-1.069	-0.825	-0.09	-0.063	0	0
2017-01-23 21:03:17		-0.206	0.025	-0.07	-0.063	0.01	0																-0.881	-0.75	-0.07	-0.063	0.01	0
2017-01-23 21:03:17		0	0.038	-0.07	-0.063	0.02	-0.063																-0.881	-0.675	-0.07	-0.063	0.02	-0.063
2017-01-23 21:03:22		0.137	0.051	-0.07	-0.063	0.01	0.063																-0.694	-0.6	-0.07	-0.063	0.01	0.063
2017-01-23 22:02:47		0.481	0.152	-0.07	-0.063	0.01	0																-0.6	-0.375	-0.07	-0.063	0.01	0
2017-01-23 23:02:50		0.481	0.393	-0.06	-0.063	0	0																-0.506	-0.375	-0.06	-0.063	0	0
2017-01-24 00:02:51		0.549	0.697	-0.06	-0.056	0	0																-0.506	-0.3	-0.06	-0.056	0	0
2017-01-24 01:02:52		0.824	1.04	-0.05	-0.056	0	0																-0.413	-0.15	-0.05	-0.056	0	0
2017-01-24 02:02:52		0.755	1.483	-0.06	-0.05	0.01	0																-0.319	-0.225	-0.06	-0.05	0.01	0
2017-01-24 03:02:42		0.412	1.661	-0.06	-0.056	0	0																-0.319	-0.15	-0.06	-0.056	0	0
2017-01-24 06:02:45		0.343	1.712	-0.07	-0.05	0	0																-0.225	-0.15	-0.07	-0.05	0	0
2017-01-24 06:02:45		0.343	1.712	-0.05	-0.05	0	0																-0.225	-0.15	-0.05	-0.05	0	0
2017-01-24 06:02:49		0.412	1.8	-0.07	-0.044	0.01	0																-0.131	-0.075	-0.07	-0.044	0.01	0
2017-01-24 07:02:43		0.343	1.851	-0.06	-0.044	-0.01	0																-0.131	-0.15	-0.06	-0.044	-0.01	0
2017-01-24 17:02:46		0.343	1.889	-0.05	-0.044	0	0																-0.131	-0.15	-0.05	-0.044	0	0
2017-01-24 17:02:47		0.206	1.851	-0.06	-0.044	0.01	-0.063																-0.131	0	-0.06	-0.044	0.01	-0.063
2017-01-24 17:02:51		0.069	1.623	-0.04	-0.044	-0.01	-0.063																-0.038	0	-0.04	-0.044	-0.01	-0.063
2017-01-24 17:02:51		0.069	1.242	-0.06	-0.038	-0.01	-0.063																-0.131	-0.075	-0.06	-0.038	-0.01	-0.063
2017-01-24 17:02:55		0.137	0.875	-0.05	-0.038	0	0																0.056	-0.075	-0.05	-0.038	0	0
2017-01-24 17:02:55		1.442	0.989	-0.05	-0.031	-0.02	0																0.056	0.075	-0.05	-0.031	-0.02	0
2017-01-24 17:03:00		1.373	0.025	-0.04	-0.038	0	-0.063																0.431	0.15	-0.04	-0.038	0	-0.063
2017-01-24 17:03:00		0.755	-0.266	-0.06	-0.031	0.01	-0.125																0.431	0.15	-0.06	-0.031	0.01	-0.125
2017-01-24 17:03:05		0.687	-0.279	-0.04	-0.031	-0.01	-0.063																0.431	0.225	-0.04	-0.031	-0.01	-0.063
2017-01-24 17:03:05		0.549	-0.279	-0.04	-0.031	-0.01	0																0.431	0.225	-0.04	-0.031	-0.01	0
2017-01-24 18:02:47		0.412	-0.292	-0.04	-0.031	-0.01	-0.063																0.431	0.15	-0.04	-0.031	-0.01	-0.063
2017-01-24 21:02:48		0.206	-0.304	-0.04	-0.025	-0.01	-0.063																0.338	0.075	-0.04	-0.025	-0.01	-0.063
2017-01-24 21:02:48		0	-0.317	-0.04	-0.025	-0.01	-0.063																0.244	0	-0.04	-0.025	-0.01	-0.063
2017-01-24 21:02:52		-0.412	-0.368	-0.05	-0.019	0	-0.125																0.244	-0.075	-0.05	-0.019	0	-0.125
2017-01-24 22:02:48		-0.549	-0.545	-0.05	-0.019	-0.02	-0.125																0.15	-0.225	-0.05	-0.019	-0.02	-0.125
2017-01-24 23:02:47		-0.412	-0.773	-0.05	-0.019	-0.01	-0.063																0.056	-0.225	-0.05	-0.019	-0.01	-0.063
2017-01-25 00:02:50		-0.549	-1.065	-0.05	-0.019	-0.01	-0.063																-0.038	-0.225	-0.05	-0.019	-0.01	-0.063
2017-01-25 03:02:47		-0.824	-1.433	-0.05	-0.019	-0.01	-0.063																-0.038	-0.3	-0.05	-0.019	-0.01	-0.063
2017-01-25 03:02:47		-1.167	-1.965	-0.03	-0.025	-0.04	-0.063																-0.131	-0.375	-0.03	-0.025	-0.04	-0.063
2017-01-25 03:02:52		-1.373	-2.65	-0.04	-0.019	-0.03	-0.125																-0.131	-0.375	-0.04	-0.019	-0.03	-0.125
2017-01-25 05:02:47		-1.648	-3.41	-0.04	-0.019	-0.04	-0.063																-0.319	-0.525	-0.04	-0.019	-0.04	-0.063
2017-01-25 05:02:47		-1.923	-4.082	-0.06	-0.019	-0.03	-0.125																-0.319	-0.525	-0.06	-0.019	-0.03	-0.125
2017-01-25 06:02:47		-1.992	-4.59	-0.05	-0.025	-0.04	-0.125																-0.413	-0.675	-0.05	-0.025	-0.04	-0.125
2017-01-25 07:02:52		-1.923	-4.919	-0.06	-0.019	-0.02	-0.125																-0.413	-0.675	-0.06	-0.019	-0.02	-0.125
2017-01-25 09:02:51		-1.785	-5.173	-0.05	-0.025	-0.03	-0.125																-0.413	-0.825	-0.05	-0.025	-0.03	-0.125
2017-01-25 09:02:51		-1.099	-5.147	-0.05	-0.025	-0.02	-0.125																-0.6	-0.825	-0.05	-0.025	-0.02	-0.125
2017-01-25 10:02:35		-0.755	-4.805	-0.06	-0.019	-0.02	-0.125																-0.413	-0.9	-0.06	-0.019	-0.02	-0.125
2017-01-25 11:02:35		-0.618	-4.526	-0.06	-0.019	-0.02	-0.125																-0.413	-0.75	-0.06	-0.019	-0.02	-0.125
2017-01-25 12:02:36		-0.481	-4.146	-0.06	-0.025	-0.02	-0.125																-0.506	-0.75	-0.06	-0.025	-0.02	-0.125
2017-01-25 13:02:41		-1.511	-3.804	-0.05	-0.025	-0.01	-0.125																-0.506	-0.75	-0.05	-0.025	-0.01	-0.125
2017-01-25 16:02:36		-2.06	-2.396	-0.06	-0.025	-0.02	-0.063																-0.788	-0.825	-0.06	-0.025	-0.02	-0.063
2017-01-25 16:02:36		-1.373	-0.786	-0.05	-0.025	-0.01	-0.125																-1.163	-0.825	-0.05	-0.025	-0.01	-0.125
2017-01-25 16:02:41		-0.824	-0.089	-0.06	-0.025	-0.01	-0.125																-1.35	-0.975	-0.06	-0.025	-0.01	-0.125
2017-01-25 22:02:53		-0.755	0.013	-0.06	-0.031	-0.03	-0.125																-1.256	-0.975	-0.06	-0.031	-0.03	-0.125
2017-01-25 22:02:53		-1.03	0	-0.06	-0.031	-0.02	-0.125																-1.163	-0.975	-0.06	-0.031	-0.02	-0.125
2017-01-25 22:02:57		-1.236	-0.076	-0.07	-0.031	-0.03	-0.125																-1.163	-0.9	-0.07	-0.031	-0.03	-0.125
2017-01-25 22:02:57		-1.03	-0.266	-0.07	-0.031	-0.03	-0.125																-1.069	-0.9	-0.07	-0.031	-0.03	-0.125
2017-01-25 22:03:02		-0.412	-0.494	-0.06	-0.038	-0.03	-0.125																-0.975	-0.825	-0.06	-0.038	-0.03	-0.125
2017-01-25 22:03:02		-0.069	-0.558	-0.06	-0.044	-0.02	-0.063																-0.975	-0.6	-0.06	-0.044	-0.02	-0.063
2017-01-25 23:02:52		-0.069	-0.545	-0.07	-0.044	-0.02	-0.125																-0.788	-0.525	-0.07	-0.044	-0.02	-0.125
2017-01-26 01:02:40		0.206	-0.444	-0.06	-0.044	-0.02	-0.125																-0.6	-0.525	-0.06	-0.044	-0.02	-0.125
2017-01-26 01:02:41		0.412	-0.165	-0.06	-0.044	-0.02	-0.188																-0.6	-0.375	-0.06	-0.044	-0.02	-0.188
2017-01-26 02:02:59		0.755	0.241	-0.08	-0.038	0	-0.188																-0.413	-0.3	-0.08	-0.038	0	-0.188
2017-01-26 04:02:28		1.03	0.811	-0.07	-0.038	-0.01	-0.063																-0.319	-0.3	-0.07	-0.038	-0.01	-0.063
2017-01-26 04:02:28		1.236	1.382	-0.06	-0.038	-0.01	-0.188																-0.225	-0.15	-0.06	-0.038	-0.01	-0.188
2017-01-26 06:02:44		1.511	1.876	-0.05	-0.044	0	-0.125																-0.225	-0.075	-0.05	-0.044	0	-0.125
2017-01-26 06:02:44		1.511	2.257	-0.05	-0.038	-0.02	-0.125																-0.131	0	-0.05	-0.038	-0.02	-0.125
2017-01-26 16:02:45		1.511	2.498	-0.05	-0.038	-0.01	-0.125																-0.038	0.075	-0.05	-0.038	-0.01	-0.125
2017-01-26 16:02:45		1.373	2.675	-0.06	-0.031	-0.01	-0.125																0.056	0.15	-0.06	-0.031	-0.01	-0.125
2017-01-26 16:02:51		0.687	2.599	-0.06	-0.031	-0.02	-0.125																0.15	0.225	-0.06	-0.031	-0.02	-0.125
2017-01-26 16:02:51		0.343	2.231	-0.05	-0.038	-0.02	-0.125																-0.038	0.225	-0.05	-0.038	-0.02	-0.125
2017-01-26 16:02:55		0.137	1.889	-0.04	-0.038	-0.02	-0.125																0.056	0.15	-0.04	-0.038	-0.02	-0.125
2017-01-26 16:02:55		-0.137	1.166	-0.04	-0.031	-0.05	-0.125																0.056	0	-0.04	-0.031	-0.05	-0.125
2017-01-26 16:02:59		-0.549	-0.013	-0.04	-0.038	-0.05	-0.125																0.056	-0.075	-0.04	-0.038	-0.05	-0.125
2017-01-26 16:02:59		-0.893	-1.42	-0.04	-0.031	-0.03	-0.125																-0.131	-0.075	-0.04	-0.031	-0.03	-0.125
2017-01-26 16:03:03		-1.648	-2.929	-0.03	-0.031	-0.06	-0.125																-0.038	-0.3	-0.03	-0.031	-0.06	-0.125
2017-01-26 16:03:03		-2.335	-3.588	-0.04	-0.031	-0.04	-0.125																-0.131	-0.375	-0.04	-0.031	-0.04	-0.125
2017-01-26 23:02:49		-2.129	-3.626	-0.04	-0.025	-0.03	-0.188																-0.413	-0.525	-0.04	-0.025	-0.03	-0.188
2017-01-26 23:02:49		-1.373	-3.563	-0.03	-0.025	-0.04	-0.125																-0.6	-0.525	-0.03	-0.025	-0.04	-0.125
2017-01-26 23:02:53		-0.618	-3.487	-0.03	-0.031	-0.03	-0.125																-0.6	-0.6	-0.03	-0.031	-0.03	-0.125
2017-01-26 23:02:53		-0.412	-3.284	-0.03	-0.031	-0.04	-0.125																-0.6	-0.525	-0.03	-0.031	-0.04	-0.125
2017-01-26 23:02:57		-0.481	-3.017	-0.04	-0.031	-0.04	-0.125																-0.6	-0.525	-0.04	-0.031	-0.04	-0.125
2017-01-26 23:02:57		-0.481	-2.789	-0.04	-0.025	-0.04	-0.125																-0.413	-0.6	-0.04	-0.025	-0.04	-0.125
2017-01-26 23:03:01		-0.412	-2.586	-0.03	-0.025	-0.04	-0.125																-0.413	-0.525	-0.03	-0.025	-0.04	-0.125
2017-01-27 00:02:49		-0.824	-2.396	-0.04	-0.025	-0.04	-0.188																-0.506	-0.525	-0.04	-0.025	-0.04	-0.188
2017-01-27 01:02:49		-1.373	-2.485	-0.04	-0.031	-0.04	-0.125																-0.413	-0.675	-0.04	-0.031	-0.04	-0.125
2017-01-27 02:02:53		-1.648	-2.624	-0.03	-0.031	-0.05	-0.125																-0.506	-0.675	-0.03	-0.031	-0.05	-0.125
2017-01-27 03:02:43		-1.717	-2.726	-0.04	-0.031	-0.04	-0.188																-0.506	-0.75	-0.04	-0.031	-0.04	-0.188
2017-01-27 04:02:43		-1.648	-2.675	-0.04	-0.038	-0.03	-0.125																-0.413	-0.75	-0.04	-0.038	-0.03	-0.125
2017-01-27 06:02:43		-0.893	-2.434	-0.04	-0.031	-0.04	-0.125																-0.319	-0.75	-0.04	-0.031	-0.04	-0.125
2017-01-27 06:02:43		-0.755	-2.155	-0.05	-0.031	-0.03	-0.125																-0.319	-0.675	-0.05	-0.031	-0.03	-0.125
2017-01-27 08:02:48		-0.755	-1.914	-0.04	-0.031	-0.04	-0.125																-0.319	-0.75	-0.04	-0.031	-0.04	-0.125
2017-01-27 08:02:48		-0.687	-1.712	-0.03	-0.031	-0.04	-0.188																-0.319	-0.675	-0.03	-0.031	-0.04	-0.188
2017-01-27 16:02:44		-0.481	-1.534	-0.02	-0.031	-0.04	-0.125																-0.225	-0.75	-0.02	-0.031	-0.04	-0.125
2017-01-27 16:02:44		-0.343	-1.395	-0.04	-0.025	-0.04	-0.188																-0.225	-0.675	-0.04	-0.025	-0.04	-0.188
2017-01-27 16:02:48		-0.206	-1.268	-0.04	-0.025	-0.04	-0.188																-0.225	-0.6	-0.04	-0.025	-0.04	-0.188
2017-01-27 16:02:49		-0.137	-1.027	-0.03	-0.031	-0.02	-0.188																-0.225	-0.525	-0.03	-0.031	-0.02	-0.188
2017-01-27 16:02:52		-0.069	-0.824	-0.04	-0.025	-0.02	-0.188																-0.225	-0.525	-0.04	-0.025	-0.02	-0.188
2017-01-27 16:02:53		-0.069	-0.773	-0.04	-0.025	-0.05	-0.188																-0.131	-0.6	-0.04	-0.025	-0.05	-0.188
2017-01-27 16:02:56		-0.069	-0.735	-0.04	-0.025	-0.03	-0.125																-0.131	-0.525	-0.04	-0.025	-0.03	-0.125
2017-01-27 16:02:57		-0.069	-0.71	-0.03	-0.025	-0.04	-0.125																-0.131	-0.45	-0.03	-0.025	-0.04	-0.125
2017-01-27 22:02:48		-0.069	-0.697	-0.03	-0.025	-0.04	-0.125																-0.131	-0.45	-0.03	-0.025	-0.04	-0.125
2017-01-27 22:02:48		0	-0.685	-0.02	-0.031	-0.03	-0.125																-0.131	-0.375	-0.02	-0.031	-0.03	-0.125
2017-01-27 22:02:52		-0.206	-0.761	-0.03	-0.025	-0.03	-0.188																-0.131	-0.375	-0.03	-0.025	-0.03	-0.188
2017-01-27 22:02:52		-0.343	-0.964	-0.03	-0.025	-0.02	-0.188																-0.131	-0.375	-0.03	-0.025	-0.02	-0.188
2017-01-27 22:02:56		-0.412	-1.179	-0.02	-0.025	-0.02	-0.188																-0.131	-0.3	-0.02	-0.025	-0.02	-0.188
2017-01-27 22:02:56		-0.549	-1.395	-0.02	-0.025	-0.03	-0.188																-0.131	-0.375	-0.02	-0.025	-0.03	-0.188
2017-01-27 23:02:45		-0.824	-1.61	-0.03	-0.025	-0.03	-0.188																-0.225	-0.45	-0.03	-0.025	-0.03	-0.188
2017-01-28 00:02:49		-0.893	-1.902	-0.02	-0.031	-0.04	-0.125																-0.131	-0.45	-0.02	-0.031	-0.04	-0.125
2017-01-28 04:02:49		-0.481	-2.029	-0.03	-0.025	-0.04	-0.125																-0.225	-0.45	-0.03	-0.025	-0.04	-0.125
2017-01-28 04:02:49		-0.343	-2.029	-0.03	-0.025	-0.03	-0.125																-0.131	-0.525	-0.03	-0.025	-0.03	-0.125
2017-01-28 04:02:53		-0.275	-1.978	-0.03	-0.025	-0.04	-0.125																-0.131	-0.45	-0.03	-0.025	-0.04	-0.125
2017-01-28 04:02:53		-0.481	-1.978	-0.03	-0.019	-0.04	-0.125																-0.225	-0.6	-0.03	-0.019	-0.04	-0.125
2017-01-28 07:02:49		-1.305	-2.168	-0.04	-0.019	-0.05	-0.188																-0.225	-0.75	-0.04	-0.019	-0.05	-0.188
2017-01-28 07:02:49		-1.442	-2.396	-0.03	-0.019	-0.04	-0.188																-0.319	-0.9	-0.03	-0.019	-0.04	-0.188
2017-01-28 07:02:53		-1.648	-2.561	-0.02	-0.025	-0.05	-0.188																-0.413	-0.975	-0.02	-0.025	-0.05	-0.188
2017-01-28 08:02:53		-1.717	-2.751	-0.04	-0.025	-0.05	-0.125																-0.413	-1.2	-0.04	-0.025	-0.05	-0.125
2017-01-28 11:02:43		-1.167	-2.789	-0.04	-0.025	-0.03	-0.188																-0.6	-1.275	-0.04	-0.025	-0.03	-0.188
2017-01-28 11:02:43		-0.824	-2.599	-0.04	-0.025	-0.03	-0.125																-0.506	-1.425	-0.04	-0.025	-0.03	-0.125
2017-01-28 11:02:47		-0.343	-2.206	-0.03	-0.025	-0.02	-0.125																-0.413	-1.425	-0.03	-0.025	-0.02	-0.125
2017-01-28 21:02:46		0.069	-1.699	-0.06	-0.019	-0.03	-0.188																-0.413	-1.275	-0.06	-0.019	-0.03	-0.188
2017-01-28 21:02:46		0.343	-0.926	-0.03	-0.025	-0.02	-0.188																-0.319	-1.125	-0.03	-0.025	-0.02	-0.188
2017-01-28 21:02:50		0.755	0.241	-0.03	-0.025	-0.02	-0.188																-0.319	-0.9	-0.03	-0.025	-0.02	-0.188
2017-01-28 21:02:50		1.099	1.547	-0.04	-0.025	-0.02	-0.188																-0.319	-0.75	-0.04	-0.025	-0.02	-0.188
2017-01-28 21:02:54		1.236	2.624	-0.04	-0.025	-0.03	-0.188																-0.319	-0.6	-0.04	-0.025	-0.03	-0.188
2017-01-28 21:02:54		0.824	3.195	-0.04	-0.031	-0.02	-0.188																-0.319	-0.6	-0.04	-0.031	-0.02	-0.188
2017-01-28 21:02:58		-0.069	3.068	-0.06	-0.025	-0.04	-0.188																-0.413	-0.675	-0.06	-0.025	-0.04	-0.188
2017-01-28 21:02:58		-0.137	2.371	-0.04	-0.025	-0.05	-0.125																-0.413	-0.675	-0.04	-0.025	-0.05	-0.125
2017-01-28 21:03:02		-0.069	1.61	-0.05	-0.025	-0.06	-0.125																-0.319	-0.75	-0.05	-0.025	-0.06	-0.125
2017-01-28 21:03:02		-0.137	0.786	-0.04	-0.025	-0.05	-0.188																-0.319	-0.75	-0.04	-0.025	-0.05	-0.188
2017-01-28 23:02:48		-0.069	0.165	-0.06	-0.025	-0.03	-0.188																-0.319	-0.675	-0.06	-0.025	-0.03	-0.188
2017-01-28 23:02:48		0.412	-0.076	-0.05	-0.031	-0.03	-0.188																-0.131	-0.6	-0.05	-0.031	-0.03	-0.188
2017-01-29 02:02:36		0.893	0	-0.06	-0.025	-0.03	-0.188																-0.225	-0.45	-0.06	-0.025	-0.03	-0.188
2017-01-29 02:02:36		0.893	0.089	-0.05	-0.025	-0.03	-0.188																-0.413	-0.3	-0.05	-0.025	-0.03	-0.188
2017-01-29 02:02:40		0.893	0.013	-0.05	-0.025	-0.04	-0.188																-0.413	-0.375	-0.05	-0.025	-0.04	-0.188
2017-01-29 03:02:42		0.687	-0.063	-0.06	-0.025	-0.04	-0.188																-0.6	-0.3	-0.06	-0.025	-0.04	-0.188
2017-01-29 05:02:47		0.755	-0.139	-0.05	-0.025	-0.03	-0.188																-0.319	-0.3	-0.05	-0.025	-0.03	-0.188
2017-01-29 05:02:47		0.755	-0.114	-0.05	-0.031	-0.04	-0.125																-0.413	-0.3	-0.05	-0.031	-0.04	-0.125
2017-01-29 06:02:44		0.824	-0.101	-0.05	-0.031	-0.04	-0.125																-0.131	-0.375	-0.05	-0.031	-0.04	-0.125
2017-01-29 07:02:43		1.099	0.063	-0.06	-0.025	-0.03	-0.188																0.056	-0.375	-0.06	-0.025	-0.03	-0.188
2017-01-29 08:02:51		1.167	0.279	-0.05	-0.025	-0.03	-0.188																-0.038	-0.225	-0.05	-0.025	-0.03	-0.188
2017-02-01 11:03:23		0.687	0.418	-0.05	-0.025	-0.04	-0.188																0.244	-0.3	-0.05	-0.025	-0.04	-0.188
2017-02-01 11:03:23		0.755	0.621	-0.04	-0.025	-0.04	-0.188																0.15	-0.15	-0.04	-0.025	-0.04	-0.188
2017-02-01 11:03:27		0.549	0.837	-0.05	-0.025	-0.05	-0.188																0.056	-0.15	-0.05	-0.025	-0.05	-0.188
2017-02-01 11:03:28		0.481	1.141	-0.03	-0.025	-0.04	-0.125																0.15	-0.075	-0.03	-0.025	-0.04	-0.125
2017-02-01 11:03:38		0.481	1.407	-0.05	-0.019	-0.04	-0.188																0.056	-0.075	-0.05	-0.019	-0.04	-0.188
2017-02-01 11:03:39		0.893	2.041	-0.05	-0.019	-0.03	-0.188																0.056	-0.075	-0.05	-0.019	-0.03	-0.188
2017-02-01 11:03:53		1.099	2.269	-0.05	-0.025	-0.04	-0.188																0.056	0	-0.05	-0.025	-0.04	-0.188
2017-02-01 11:03:53		1.236	2.029	-0.04	-0.025	-0.03	-0.188																0.056	-0.075	-0.04	-0.025	-0.03	-0.188
2017-02-01 11:04:11		1.305	1.8	-0.05	-0.019	-0.04	-0.188																0.15	0.15	-0.05	-0.019	-0.04	-0.188
2017-02-01 11:04:11		1.579	1.965	-0.04	-0.019	-0.03	-0.188																0.338	0.3	-0.04	-0.019	-0.03	-0.188
2017-02-01 11:04:30		1.099	2.739	-0.05	-0.019	-0.03	-0.188																0.431	0.375	-0.05	-0.019	-0.03	-0.188
2017-02-01 11:04:30		0.824	3.677	-0.04	-0.019	-0.01	-0.25																0.431	0.525	-0.04	-0.019	-0.01	-0.25
2017-02-01 11:04:44		0.875	3.955	-0.05	-0.019	-0.02	-0.188																0.431	0.053	-0.05	-0.019	-0.02	-0.188
2017-02-01 11:04:44		0.942	4.337	-0.03	-0.019	-0.04	-0.188																0.431	0.045	-0.03	-0.019	-0.04	-0.188
2017-02-01 11:04:50		0.606	4.337	-0.03	-0.013	-0.04	-0.188																0.244	0.045	-0.03	-0.013	-0.04	-0.188
2017-02-01 11:04:50		0.538	4.044	-0.03	-0.013	-0.03	-0.188																0.338	0.038	-0.03	-0.013	-0.03	-0.188
2017-02-01 11:04:56		0.875	3.842	-0.03	-0.013	-0.05	-0.188																0.713	0.03	-0.03	-0.013	-0.05	-0.188
2017-02-01 11:04:56		1.077	3.932	-0.02	-0.013	-0.04	-0.188																0.619	0.053	-0.02	-0.013	-0.04	-0.188
2017-02-01 11:05:02		1.211	4.011	0	-0.013	-0.03	-0.188																0.9	0.06	0	-0.013	-0.03	-0.188
2017-02-01 11:05:02		1.346	4.078	-0.02	-0.013	-0.04	-0.188																0.619	0.075	-0.02	-0.013	-0.04	-0.188
2017-02-01 11:05:07		1.481	4.101	-0.01	-0.006	-0.04	-0.188																0.806	0.09	-0.01	-0.006	-0.04	-0.188
2017-02-01 11:05:08		1.413	4.112	-0.01	-0.006	-0.03	-0.25																0.619	0.113	-0.01	-0.006	-0.03	-0.25
2017-02-01 11:05:14		1.346	3.955	-0.01	-0.006	-0.03	-0.188																0.431	0.128	-0.01	-0.006	-0.03	-0.188
2017-02-01 11:05:14		1.279	3.831	-0.01	-0.006	-0.03	-0.188																0.619	0.135	-0.01	-0.006	-0.03	-0.188
2017-02-01 11:05:19		1.077	3.696	-0.01	-0.006	-0.04	-0.188																0.525	0.15	-0.01	-0.006	-0.04	-0.188
2017-02-01 11:05:19		0.673	3.449	-0.01	-0.006	-0.04	-0.188																0.525	0.15	-0.01	-0.006	-0.04	-0.188
2017-02-01 12:05:04		0.606	3.382	-0.01	-0.006	-0.04	-0.188																0.525	0.15	-0.01	-0.006	-0.04	-0.188
2017-02-01 12:05:04		0.606	3.797	-0.01	-0.006	-0.03	-0.188																0.525	0.15	-0.01	-0.006	-0.03	-0.188
2017-02-01 12:05:10		2.827	4.235	0	-0.013	-0.04	-0.125																0.713	0.158	0	-0.013	-0.04	-0.125
2017-02-01 12:05:10		3.971	2.921	-0.02	-0.006	-0.04	-0.125																1.275	0.173	-0.02	-0.006	-0.04	-0.125
2017-02-01 12:05:15		4.509	1.494	0	0	-0.02	-0.188																2.025	0.203	0	0	-0.02	-0.188
2017-02-01 12:05:15		4.307	0.663	0	0	-0.02	-0.188																2.681	0.24	0	0	-0.02	-0.188
2017-02-01 12:05:21		4.105	0.202	0.01	0.006	-0.03	-0.188																3.15	0.24	0.01	0.006	-0.03	-0.188
2017-02-01 12:05:22		3.096	-0.045	0	0.006	-0.03	-0.188																3.244	0.233	0	0.006	-0.03	-0.188
2017-02-01 12:05:26		2.154	-0.225	0.01	0.013	-0.03	-0.188																2.869	0.21	0.01	0.013	-0.03	-0.188
2017-02-01 12:05:26		1.211	-0.326	0	0.019	-0.05	-0.125																2.4	0.173	0	0.019	-0.05	-0.125
2017-02-01 12:05:32		0.538	-0.27	0.01	0.025	-0.05	-0.125																2.213	0.135	0.01	0.025	-0.05	-0.125
2017-02-01 12:05:32		0.135	-0.326	0.01	0.031	-0.04	-0.125																1.463	0.128	0.01	0.031	-0.04	-0.125
2017-02-01 12:05:39		0	-0.438	0.02	0.031	-0.05	-0.125																1.275	0.098	0.02	0.031	-0.05	-0.125
2017-02-01 12:05:39		-0.135	-0.528	0.01	0.038	-0.05	-0.125																1.088	0.083	0.01	0.038	-0.05	-0.125
2017-02-01 12:05:46		-0.404	-0.798	0	0.038	-0.03	-0.188																0.713	0.075	0	0.038	-0.03	-0.188
2017-02-01 12:05:46		-0.606	-1.359	-0.01	0.038	-0.04	-0.188																0.525	0.06	-0.01	0.038	-0.04	-0.188
2017-02-01 12:05:51		-0.673	-1.944	-0.01	0.038	-0.03	-0.188																0.244	0.038	-0.01	0.038	-0.03	-0.188
2017-02-01 12:05:51		-0.875	-2.348	-0.02	0.038	-0.04	-0.188																0.15	0.03	-0.02	0.038	-0.04	-0.188
2017-02-01 12:05:56		-1.077	-2.663	-0.01	0.031	-0.03	-0.188																-0.225	0.023	-0.01	0.031	-0.03	-0.188
2017-02-01 12:05:56		-1.211	-2.932	-0.02	0.031	-0.05	-0.125																-0.319	0.008	-0.02	0.031	-0.05	-0.125
2017-02-01 12:06:04		-1.346	-3.191	-0.04	0.031	-0.05	-0.125																-0.319	-0.008	-0.04	0.031	-0.05	-0.125
2017-02-01 12:06:04		-1.346	-3.415	-0.04	0.031	-0.04	-0.125																-0.131	-0.038	-0.04	0.031	-0.04	-0.125
2017-02-01 12:06:12		-0.808	-3.247	-0.03	0.031	-0.03	-0.125																0.244	-0.045	-0.03	0.031	-0.03	-0.125
2017-02-01 12:06:13		-0.337	-2.809	-0.03	0.031	-0.02	-0.188																0.338	-0.038	-0.03	0.031	-0.02	-0.188
2017-02-01 12:06:18		-0.269	-2.528	-0.03	0.031	-0.02	-0.188																0.338	-0.023	-0.03	0.031	-0.02	-0.188
2017-02-01 12:06:18		-0.538	-2.932	-0.02	0.025	-0.03	-0.188																0.244	-0.045	-0.02	0.025	-0.03	-0.188
2017-02-01 12:06:24		-2.894	-3.516	-0.04	0.031	-0.03	-0.188																0.056	-0.06	-0.04	0.031	-0.03	-0.188
2017-02-01 12:06:24		-4.509	-2.73	-0.02	0.025	-0.03	-0.188																-0.506	-0.09	-0.02	0.025	-0.03	-0.188
2017-02-01 12:06:31		-4.442	-1.258	-0.02	0.019	-0.04	-0.125																-1.256	-0.12	-0.02	0.019	-0.04	-0.125
2017-02-01 12:06:31		-3.432	-0.584	-0.04	0.019	-0.04	-0.125																-1.819	-0.15	-0.04	0.019	-0.04	-0.125
2017-02-01 12:06:38		-2.827	-0.449	-0.04	0.013	-0.03	-0.125																-2.006	-0.15	-0.04	0.013	-0.03	-0.125
2017-02-01 12:06:38		-1.952	-0.348	-0.03	0.013	-0.03	-0.125																-1.913	-0.143	-0.03	0.013	-0.03	-0.125
2017-02-01 12:06:48		-1.279	-0.258	-0.04	0.006	-0.03	-0.125																-1.538	-0.128	-0.04	0.006	-0.03	-0.125
2017-02-01 12:06:48		-0.875	-0.202	-0.03	0	-0.03	-0.125																-1.163	-0.105	-0.03	0	-0.03	-0.125
2017-02-01 12:07:02		-0.606	-0.281	-0.03	-0.006	-0.04	-0.125																-1.256	-0.083	-0.03	-0.006	-0.04	-0.125
2017-02-01 12:07:03		-0.337	-0.348	-0.03	-0.013	-0.03	-0.125																-0.6	-0.083	-0.03	-0.013	-0.03	-0.125
2017-02-01 12:07:09		-0.135	-0.326	-0.05	-0.013	-0.03	-0.125																-0.506	-0.068	-0.05	-0.013	-0.03	-0.125
2017-02-01 12:07:09		0.135	-0.281	-0.03	-0.019	-0.02	-0.125																-0.225	-0.053	-0.03	-0.019	-0.02	-0.125
2017-02-01 12:07:17		0.269	-0.011	-0.02	-0.019	-0.02	-0.063																-0.038	-0.045	-0.02	-0.019	-0.02	-0.063
2017-02-01 12:07:17		0.269	0.303	-0.02	-0.019	-0.01	-0.125																0.15	-0.038	-0.02	-0.019	-0.01	-0.125
2017-02-01 12:07:22		0.269	0.494	-0.03	-0.019	-0.03	-0.063																0.15	-0.03	-0.03	-0.019	-0.03	-0.063
2017-02-01 12:07:22		0.269	0.573	-0.02	-0.019	-0.01	-0.125																0.431	-0.038	-0.02	-0.019	-0.01	-0.125
2017-02-01 12:07:28		0.471	0.73	-0.02	-0.013	-0.01	-0.125																0.713	-0.038	-0.02	-0.013	-0.01	-0.125
2017-02-01 12:07:28		0.942	1.101	-0.01	-0.013	0.01	-0.125																0.806	-0.015	-0.01	-0.013	0.01	-0.125
2017-02-01 12:07:35		1.01	1.438	0.01	-0.019	0.01	-0.125																0.9	0	0.01	-0.019	0.01	-0.125
2017-02-01 12:07:35		1.01	1.674	0.01	-0.019	0	-0.125																0.619	0.023	0.01	-0.019	0	-0.125
2017-02-01 12:07:42		0.538	1.494	-0.01	-0.019	-0.01	-0.125																0.15	0.03	-0.01	-0.019	-0.01	-0.125
2017-02-01 12:07:42		0.202	1.202	0	-0.019	-0.01	-0.063																0.056	0.03	0	-0.019	-0.01	-0.063
2017-02-01 12:07:48		0.067	0.944	0	-0.019	-0.02	-0.063																0.056	0.015	0	-0.019	-0.02	-0.063
2017-02-01 12:07:48		0.135	0.843	-0.02	-0.013	-0.01	-0.063																0.056	0.023	-0.02	-0.013	-0.01	-0.063
2017-02-01 13:03:09		0.404	1.157	0	-0.013	-0.02	-0.063																0.056	0.03	0	-0.013	-0.02	-0.063
2017-02-01 14:05:09		1.211	1.292	-0.01	-0.013	-0.02	-0.063																0.15	0.03	-0.01	-0.013	-0.02	-0.063
2017-02-01 15:02:46		1.413	0.416	-0.01	-0.013	-0.01	-0.063																0.431	0.023	-0.01	-0.013	-0.01	-0.063
2017-02-01 16:02:43		0.74	-0.191	0	-0.013	-0.02	-0.063																0.806	0.023	0	-0.013	-0.02	-0.063
2017-02-01 17:02:45		0.202	-0.281	0	-0.013	-0.01	-0.063																0.806	0.015	0	-0.013	-0.01	-0.063
2017-02-01 18:02:45		-0.337	-0.326	-0.01	-0.006	-0.01	-0.063																0.619	0.008	-0.01	-0.006	-0.01	-0.063
2017-02-01 19:02:45		-0.875	-0.348	0	-0.013	-0.02	-0.063																-0.038	0.023	0	-0.013	-0.02	-0.063
2017-02-01 20:02:50		-0.673	-0.685	-0.01	-0.006	-0.01	-0.063																-0.225	0.008	-0.01	-0.006	-0.01	-0.063
2017-02-01 21:02:45		-0.202	-1.123	-0.02	-0.006	-0.01	-0.125																0.244	-0.023	-0.02	-0.006	-0.01	-0.125
2017-02-01 22:02:45		-0.673	-1.404	-0.02	-0.006	-0.01	-0.125																0.244	-0.008	-0.02	-0.006	-0.01	-0.125
2017-02-01 23:02:46		-1.279	-2	-0.01	-0.006	-0.02	-0.063																0.244	-0.015	-0.01	-0.006	-0.02	-0.063
2017-02-02 00:02:45		-1.548	-2.505	-0.02	0	-0.02	-0.125																0.056	-0.023	-0.02	0	-0.02	-0.125
2017-02-02 01:02:45		-1.952	-2.82	-0.03	0	-0.02	-0.125																-0.038	-0.038	-0.03	0	-0.02	-0.125
2017-02-02 02:02:49		-2.019	-2.887	-0.02	-0.006	-0.03	-0.063																0.056	-0.053	-0.02	-0.006	-0.03	-0.063
2017-02-02 03:02:43		-2.423	-2.797	-0.01	-0.006	-0.02	-0.125																0.056	-0.06	-0.01	-0.006	-0.02	-0.125
2017-02-02 04:02:46		-2.558	-2.775	0	-0.006	-0.03	-0.063																-0.131	-0.068	0	-0.006	-0.03	-0.063
2017-02-02 05:02:47		-2.827	-2.887	-0.01	-0.006	-0.03	-0.063																-0.319	-0.083	-0.01	-0.006	-0.03	-0.063
2017-02-02 06:02:44		-3.5	-3.191	-0.01	-0.006	-0.04	-0.063																-0.413	-0.113	-0.01	-0.006	-0.04	-0.063
2017-02-02 07:02:43		-3.769	-3.449	-0.02	0	-0.05	-0.063																-0.6	-0.15	-0.02	0	-0.05	-0.063
2017-02-02 08:02:49		-3.163	-3.629	-0.03	0	-0.05	-0.063																-0.6	-0.18	-0.03	0	-0.05	-0.063
2017-02-02 09:02:43		-1.884	-3.427	-0.02	-0.006	-0.04	-0.063																-0.694	-0.195	-0.02	-0.006	-0.04	-0.063
2017-02-02 10:03:02		-1.077	-3.112	-0.03	-0.006	-0.03	-0.063																-0.413	-0.225	-0.03	-0.006	-0.03	-0.063
2017-02-02 11:02:44		-0.606	-2.854	-0.03	-0.006	-0.02	-0.063																-0.413	-0.218	-0.03	-0.006	-0.02	-0.063
2017-02-02 13:02:29		-0.269	-2.618	-0.02	-0.006	-0.03	-0.063																-0.413	-0.21	-0.02	-0.006	-0.03	-0.063
2017-02-02 13:02:29		-0.202	-2.55	-0.03	-0.013	-0.02	-0.063																-0.319	-0.203	-0.03	-0.013	-0.02	-0.063
2017-02-02 14:02:50		-0.471	-2.179	-0.03	-0.013	-0.02	-0.063																-0.413	-0.173	-0.03	-0.013	-0.02	-0.063
2017-02-02 15:02:47		-1.077	-1.359	-0.04	-0.006	-0.03	-0.063																-0.694	-0.165	-0.04	-0.006	-0.03	-0.063
2017-02-02 16:02:44		-1.279	-0.674	-0.03	-0.006	-0.02	-0.063																-1.163	-0.158	-0.03	-0.006	-0.02	-0.063
2017-02-02 17:02:44		-1.346	-0.315	-0.04	-0.006	-0.03	-0.063																-1.538	-0.15	-0.04	-0.006	-0.03	-0.063
2017-02-02 18:02:45		-1.481	-0.191	-0.03	-0.019	-0.02	-0.125																-1.631	-0.143	-0.03	-0.019	-0.02	-0.125
2017-02-02 19:02:46		-1.01	-0.427	-0.04	-0.013	-0.03	-0.063																-1.163	-0.165	-0.04	-0.013	-0.03	-0.063
2017-02-02 20:02:50		-0.404	-1.011	-0.03	-0.025	-0.02	-0.125																-1.163	-0.143	-0.03	-0.025	-0.02	-0.125
2017-02-02 21:02:44		-0.538	-1.64	-0.04	-0.025	-0.03	0																-1.631	-0.098	-0.04	-0.025	-0.03	0
2017-02-02 22:02:44		-0.067	-2.101	-0.06	-0.025	-0.02	-0.063																-1.631	-0.098	-0.06	-0.025	-0.02	-0.063
2017-02-02 23:02:45		0.337	-1.887	-0.05	-0.031	-0.01	-0.125																-1.538	-0.083	-0.05	-0.031	-0.01	-0.125
2017-02-03 00:02:45		0.337	-1.46	-0.06	-0.038	-0.01	-0.063																-1.631	-0.165	-0.06	-0.038	-0.01	-0.063
2017-02-03 01:02:45		0.538	-1.213	-0.06	-0.038	-0.02	-0.063																-1.538	-0.15	-0.06	-0.038	-0.02	-0.063
2017-02-03 02:02:49		0.606	-1.079	-0.08	-0.031	-0.01	-0.063																-1.538	-0.15	-0.08	-0.031	-0.01	-0.063
2017-02-03 03:02:42		0.942	-0.921	-0.08	-0.038	-0.02	-0.063																-1.444	-0.135	-0.08	-0.038	-0.02	-0.063
2017-02-03 04:02:45		1.01	-0.73	-0.09	-0.038	-0.01	-0.063																-1.538	-0.12	-0.09	-0.038	-0.01	-0.063
2017-02-03 05:02:45		1.077	-0.562	-0.1	-0.038	-0.01	-0.063																-1.35	-0.135	-0.1	-0.038	-0.01	-0.063
2017-02-03 06:02:45		1.211	-0.438	-0.09	-0.044	-0.02	-0.063																-1.444	-0.165	-0.09	-0.044	-0.02	-0.063
2017-02-03 07:02:46		1.279	-0.326	-0.09	-0.044	-0.01	-0.063																-1.35	-0.18	-0.09	-0.044	-0.01	-0.063
2017-02-03 08:02:51		0.673	-0.225	-0.09	-0.038	0	-0.063																-0.881	-0.285	-0.09	-0.038	0	-0.063
2017-02-03 09:02:44		0	-0.213	-0.08	-0.025	-0.01	-0.063																-0.131	-0.405	-0.08	-0.025	-0.01	-0.063
2017-02-03 10:02:44		-0.067	-0.247	-0.07	-0.025	-0.03	-0.063																-0.131	-0.435	-0.07	-0.025	-0.03	-0.063
2017-02-03 11:02:45		-0.067	-0.315	-0.07	-0.031	-0.01	-0.125																-0.131	-0.48	-0.07	-0.031	-0.01	-0.125
2017-02-03 12:02:44		-0.067	-0.393	-0.08	-0.025	0	-0.125																-0.038	-0.48	-0.08	-0.025	0	-0.125
2017-02-03 13:02:43		-0.135	-0.494	-0.08	-0.025	-0.01	-0.063																-0.131	-0.465	-0.08	-0.025	-0.01	-0.063
2017-02-03 14:02:50		-0.269	-0.595	-0.08	-0.025	-0.02	-0.063																-0.038	-0.48	-0.08	-0.025	-0.02	-0.063
2017-02-03 15:03:04		-0.337	-0.539	-0.07	-0.025	-0.01	-0.125																-0.131	-0.435	-0.07	-0.025	-0.01	-0.125
2017-02-03 16:02:44		-0.269	-0.393	-0.08	-0.025	-0.02	-0.125																-0.038	-0.42	-0.08	-0.025	-0.02	-0.125
2017-02-03 17:04:35		-0.067	-0.315	-0.07	-0.025	-0.01	-0.125																-0.038	-0.39	-0.07	-0.025	-0.01	-0.125
2017-02-03 18:03:04		-1.144	-0.595	-0.06	-0.025	-0.05	-0.063																-0.225	-0.375	-0.06	-0.025	-0.05	-0.063
2017-02-03 19:02:44		0	-1.191	-0.06	-0.025	-0.02	-0.125																-0.131	-0.345	-0.06	-0.025	-0.02	-0.125
2017-02-03 20:02:48		-0.135	-1.382	-0.06	-0.019	-0.03	-0.063																-0.131	-0.33	-0.06	-0.019	-0.03	-0.063
2017-02-03 21:02:41		-0.135	-1.281	-0.05	-0.025	-0.02	-0.125																-0.038	-0.33	-0.05	-0.025	-0.02	-0.125
2017-02-03 22:02:44		-0.135	-1	-0.04	-0.019	-0.04	-0.063																0.15	-0.33	-0.04	-0.019	-0.04	-0.063
2017-02-03 23:02:44		0.269	-0.652	-0.05	-0.019	-0.03	-0.063																0.431	-0.33	-0.05	-0.019	-0.03	-0.063
2017-02-04 00:02:44		0.404	-0.315	-0.04	-0.013	-0.03	-0.063																0.713	-0.3	-0.04	-0.013	-0.03	-0.063
2017-02-04 01:02:44		0.404	-0.101	-0.03	-0.019	-0.03	-0.063																0.806	-0.3	-0.03	-0.019	-0.03	-0.063
2017-02-04 02:02:49		0.538	0.09	-0.03	-0.013	-0.03	-0.063																0.806	-0.255	-0.03	-0.013	-0.03	-0.063
2017-02-04 03:02:45		0.538	0.225	-0.03	-0.006	-0.01	-0.125																0.806	-0.255	-0.03	-0.006	-0.01	-0.125
2017-02-04 04:02:45		0.538	0.258	-0.01	-0.013	-0.03	-0.125																0.713	-0.24	-0.01	-0.013	-0.03	-0.125
2017-02-04 05:02:46		0.538	0.258	-0.01	-0.013	-0.03	-0.125																0.713	-0.24	-0.01	-0.013	-0.03	-0.125
2017-02-04 06:02:46		0.673	0.326	-0.02	-0.006	-0.01	-0.125																1.275	-0.255	-0.02	-0.006	-0.01	-0.125
2017-02-04 07:02:45		0.942	0.438	-0.01	-0.006	-0.01	-0.125																1.181	-0.195	-0.01	-0.006	-0.01	-0.125
2017-02-04 08:02:50		1.481	0.82	0	-0.013	-0.02	-0.125																0.994	-0.09	0	-0.013	-0.02	-0.125
2017-02-04 09:02:50		1.683	1.236	-0.01	-0.019	-0.01	-0.125																0.525	0.045	-0.01	-0.019	-0.01	-0.125
2017-02-04 10:02:44		1.279	1.584	-0.02	-0.019	-0.01	-0.125																0.244	0.15	-0.02	-0.019	-0.01	-0.125
2017-02-04 11:02:52		1.077	2.078	-0.02	-0.013	-0.02	-0.063																0.244	0.225	-0.02	-0.013	-0.02	-0.063
2017-02-04 12:02:46		1.279	2.775	-0.02	-0.019	-0.03	-0.063																0.244	0.255	-0.02	-0.019	-0.03	-0.063
2017-02-04 13:02:53		1.884	3.213	-0.01	-0.013	-0.02	-0.125																0.244	0.255	-0.01	-0.013	-0.02	-0.125
2017-02-04 14:03:04		2.019	2.618	0	-0.013	-0.02	-0.125																0.15	0.27	0	-0.013	-0.02	-0.125
2017-02-04 15:03:17		1.548	1.562	0	-0.013	-0.03	-0.063																0.338	0.27	0	-0.013	-0.03	-0.063
2017-02-04 16:03:15		0.875	0.809	-0.01	-0.013	-0.02	-0.125																0.431	0.285	-0.01	-0.013	-0.02	-0.125
2017-02-04 17:02:45		0	0.348	0	-0.013	-0.05	-0.063																0.713	0.27	0	-0.013	-0.05	-0.063
2017-02-04 19:02:44		1.144	0.539	-0.01	-0.006	-0.02	-0.063																0.9	0.225	-0.01	-0.006	-0.02	-0.063
2017-02-04 20:02:50		0.337	1.202	-0.01	-0.006	-0.01	-0.125																0.806	0.195	-0.01	-0.006	-0.01	-0.125
2017-02-04 21:02:44		0.471	1.798	-0.01	-0.006	-0.01	-0.125																0.994	0.165	-0.01	-0.006	-0.01	-0.125
2017-02-04 22:02:44		0.74	2.303	-0.01	0	-0.01	-0.125																1.088	0.165	-0.01	0	-0.01	-0.125
2017-02-04 23:02:45		0.606	2.314	0	-0.006	-0.01	-0.125																0.619	0.165	0	-0.006	-0.01	-0.125
2017-02-05 00:02:45		0.337	1.932	0	0	-0.01	-0.125																0.619	0.15	0	0	-0.01	-0.125
2017-02-05 01:02:44		0.202	1.528	0	-0.006	-0.02	-0.125																0.431	0.135	0	-0.006	-0.02	-0.125
2017-02-05 02:02:48		0.202	1.236	-0.01	0	-0.01	-0.125																0.15	0.135	-0.01	0	-0.01	-0.125
2017-02-05 03:02:46		-0.067	0.944	-0.02	-0.006	-0.02	-0.125																-0.131	0.135	-0.02	-0.006	-0.02	-0.125
2017-02-05 04:02:43		0	0.663	-0.01	-0.013	-0.03	-0.063																0.056	0.105	-0.01	-0.013	-0.03	-0.063
2017-02-05 05:02:46		0.269	0.64	-0.03	0	-0.02	-0.063																0.713	0.075	-0.03	0	-0.02	-0.063
2017-02-05 06:02:46		0.337	0.663	-0.01	0	-0.04	-0.063																0.338	0.15	-0.01	0	-0.04	-0.063
2017-02-05 07:02:46		0.269	0.573	-0.01	-0.006	-0.02	-0.063																-0.225	0.21	-0.01	-0.006	-0.02	-0.063
2017-02-05 08:02:50		0.202	0.461	-0.03	0	-0.03	-0.125																0.244	0.18	-0.03	0	-0.03	-0.125
2017-02-05 09:02:41		0.135	0.371	-0.02	0	-0.02	-0.125																0.244	0.225	-0.02	0	-0.02	-0.125
2017-02-05 10:02:45		-0.135	0.225	-0.02	0	-0.03	-0.125																0.244	0.24	-0.02	0	-0.03	-0.125
2017-02-05 11:02:47		-0.202	-0.056	-0.02	0	-0.03	-0.063																0.244	0.21	-0.02	0	-0.03	-0.063
2017-02-05 12:02:59		-0.404	-0.472	-0.02	0	-0.02	-0.125																0.244	0.18	-0.02	0	-0.02	-0.125
2017-02-05 13:02:45		-0.808	-1.045	-0.02	0	-0.04	-0.125																0.244	0.15	-0.02	0	-0.04	-0.125
2017-02-05 14:02:52		-1.211	-1.225	-0.02	0	-0.04	-0.125																0.244	0.135	-0.02	0	-0.04	-0.125
2017-02-05 15:02:53		-1.346	-0.764	-0.02	0	-0.01	-0.125																0.244	0.105	-0.02	0	-0.01	-0.125
2017-02-05 16:02:44		-1.144	-0.494	-0.02	-0.006	-0.03	-0.125																0.15	0.06	-0.02	-0.006	-0.03	-0.125
2017-02-05 17:02:44		-0.875	-0.326	-0.01	0	-0.03	-0.063																0.056	0	-0.01	0	-0.03	-0.063
2017-02-05 18:02:42		-0.337	-0.191	-0.02	-0.006	-0.02	-0.125																-0.038	-0.03	-0.02	-0.006	-0.02	-0.125
2017-02-05 19:02:47		-0.135	-0.18	-0.02	-0.006	-0.01	-0.188																0.056	-0.045	-0.02	-0.006	-0.01	-0.188
2017-02-05 20:02:49		0	-0.124	-0.02	-0.006	-0.02	-0.125																0.056	-0.03	-0.02	-0.006	-0.02	-0.125
2017-02-05 21:02:44		0.067	-0.034	-0.01	-0.006	-0.03	-0.125																0.056	-0.015	-0.01	-0.006	-0.03	-0.125
2017-02-05 22:02:43		-0.135	-0.034	-0.03	0	-0.03	-0.063																0.056	-0.03	-0.03	0	-0.03	-0.063
2017-02-05 23:02:46		0.202	0.169	-0.04	0	-0.03	-0.063																0.525	-0.045	-0.04	0	-0.03	-0.063
2017-02-06 00:02:46		0.337	0.517	-0.04	0	-0.02	-0.125																0.244	0	-0.04	0	-0.02	-0.125
2017-02-06 01:02:46		0.471	0.775	-0.04	0	-0.02	-0.125																0.431	-0.03	-0.04	0	-0.02	-0.125
2017-02-06 02:02:50		0.673	1.101	-0.03	0	-0.02	-0.125																0.713	0	-0.03	0	-0.02	-0.125
2017-02-06 03:02:44		1.01	1.472	-0.01	0	-0.02	-0.125																0.9	0	-0.01	0	-0.02	-0.125
2017-02-06 04:02:45		1.077	1.82	-0.01	0.006	-0.02	-0.125																0.806	0.06	-0.01	0.006	-0.02	-0.125
2017-02-06 05:02:44		0.942	1.865	-0.01	0	-0.02	-0.125																0.431	0.075	-0.01	0	-0.02	-0.125
2017-02-06 06:02:44		0.875	1.82	0	-0.006	0	-0.125																0.713	0.06	0	-0.006	0	-0.125
2017-02-06 07:02:44		0.808	1.708	-0.02	0.006	-0.02	-0.125																0.619	0.075	-0.02	0.006	-0.02	-0.125
2017-02-06 08:02:50		0.875	1.517	0	0	-0.02	-0.063																0.525	0.105	0	0	-0.02	-0.063
2017-02-06 09:02:41		0.875	1.494	-0.02	0	-0.03	-0.063																0.431	0.135	-0.02	0	-0.03	-0.063
2017-02-06 10:02:46		0.808	1.64	-0.01	0	-0.02	-0.063																0.338	0.165	-0.01	0	-0.02	-0.063
2017-02-06 11:03:00		0.673	2.022	-0.01	0	-0.02	-0.125																0.431	0.21	-0.01	0	-0.02	-0.125
2017-02-06 12:02:47		0.808	2.651	-0.01	0	-0.03	-0.063																0.431	0.24	-0.01	0	-0.03	-0.063
2017-02-06 13:02:50		1.615	3.247	0	0	-0.02	-0.063																0.431	0.255	0	0	-0.02	-0.063
2017-02-06 14:02:49		2.558	2.561	-0.01	0	-0.01	-0.063																0.525	0.255	-0.01	0	-0.01	-0.063
2017-02-06 15:04:03		3.096	1.269	-0.01	0	-0.02	-0.125																1.088	0.27	-0.01	0	-0.02	-0.125
2017-02-06 16:03:19		3.163	0.528	-0.01	0.006	0	-0.125																1.744	0.3	-0.01	0.006	0	-0.125
2017-02-06 17:02:43		2.827	0.124	-0.01	0	-0.01	-0.125																2.119	0.33	-0.01	0	-0.01	-0.125
2017-02-06 18:02:44		2.423	-0.067	0	0.006	0	-0.125																2.213	0.315	0	0.006	0	-0.125
2017-02-06 19:02:44		1.952	-0.124	-0.01	0.013	-0.02	-0.063																2.025	0.3	-0.01	0.013	-0.02	-0.063
2017-02-06 20:02:46		1.211	-0.011	0.01	0.019	-0.02	-0.063																1.838	0.285	0.01	0.019	-0.02	-0.063
2017-02-06 21:02:43		0.269	0.315	0	0.019	-0.03	-0.063																1.556	0.21	0	0.019	-0.03	-0.063
2017-02-06 22:02:44		0.135	0.539	0.02	0.019	-0.02	-0.125																1.275	0.18	0.02	0.019	-0.02	-0.125
2017-02-06 23:02:44		-0.067	0.663	0.03	0.025	-0.02	-0.125																1.275	0.15	0.03	0.025	-0.02	-0.125
2017-02-07 00:02:43		-0.404	0.584	0.03	0.025	-0.03	-0.063																1.181	0.12	0.03	0.025	-0.03	-0.063
2017-02-07 01:02:46		-0.808	0.169	0.03	0.025	-0.04	-0.063																0.9	0.12	0.03	0.025	-0.04	-0.063
2017-02-07 02:02:50		-1.279	-0.483	0.04	0.025	-0.03	-0.063																0.713	0.075	0.04	0.025	-0.03	-0.063
2017-02-07 03:02:43		-1.683	-1.022	0.03	0.025	-0.03	-0.063																0.713	0.03	0.03	0.025	-0.03	-0.063
2017-02-07 04:02:43		-1.683	-1.393	0.02	0.025	-0.03	-0.063																0.619	-0.015	0.02	0.025	-0.03	-0.063
2017-02-07 05:02:44		-1.952	-1.584	0.03	0.025	-0.03	-0.063																0.431	0	0.03	0.025	-0.03	-0.063
2017-02-07 06:02:43		-2.019	-1.696	0	0.031	-0.04	-0.063																0.431	-0.225	0	0.031	-0.04	-0.063
2017-02-07 07:02:45		-1.817	-1.696	0.02	0.025	-0.03	-0.063																0.619	-0.3	0.02	0.025	-0.03	-0.063
2017-02-07 08:02:50		-1.144	-1.539	0.01	0.025	-0.01	-0.063																0.431	-0.3	0.01	0.025	-0.01	-0.063
2017-02-07 09:02:46		-0.808	-1.416	0.02	0.025	0	-0.063																0.244	-0.375	0.02	0.025	0	-0.063
2017-02-07 10:04:06		-0.538	-1.427	0.01	0.025	-0.02	-0.063																0.244	-0.45	0.01	0.025	-0.02	-0.063
2017-02-07 11:02:45		-0.471	-1.618	0.01	0.025	-0.01	-0.063																0.244	-0.525	0.01	0.025	-0.01	-0.063
2017-02-07 12:02:45		-0.538	-1.989	0.01	0.019	-0.02	-0.125																0.244	-0.6	0.01	0.019	-0.02	-0.125
2017-02-07 13:02:45		-1.144	-2.168	0	0.019	0	-0.063																0.15	-0.525	0	0.019	0	-0.063
2017-02-07 14:03:32		-1.817	-1.393	0	0.019	-0.01	-0.125																0.056	-0.525	0	0.019	-0.01	-0.125
2017-02-07 15:03:42		-2.288	-0.708	0	0.019	-0.03	-0.063																-0.506	-0.6	0	0.019	-0.03	-0.063
2017-02-07 16:02:28		-2.019	-0.382	0	0.019	-0.03	-0.063																-0.975	-0.75	0	0.019	-0.03	-0.063
2017-02-07 17:02:43		-1.481	-0.281	0	0.019	-0.02	-0.063																-0.975	-0.75	0	0.019	-0.02	-0.063
2017-02-07 18:02:41		-0.942	-0.213	-0.02	0.019	-0.02	-0.063																-0.881	-0.675	-0.02	0.019	-0.02	-0.063
2017-02-07 19:02:44		-0.202	-0.169	-0.01	0.013	-0.03	0																-0.6	-0.525	-0.01	0.013	-0.03	0
2017-02-07 20:03:52		0.606	-0.067	-0.03	0.006	-0.01	-0.063																-0.319	-0.375	-0.03	0.006	-0.01	-0.063
2017-02-07 21:02:44		1.346	0.09	-0.02	0.006	0.01	-0.063																0.056	0	-0.02	0.006	0.01	-0.063
2017-02-07 22:02:44		1.481	0.607	-0.02	0	0.01	-0.063																0.338	0.15	-0.02	0	0.01	-0.063
2017-02-07 23:02:46		1.481	1.213	-0.03	0	-0.01	0																0.15	0.3	-0.03	0	-0.01	0
2017-02-08 01:02:26		1.615	1.865	-0.02	0	0.01	-0.063																0.338	0.375	-0.02	0	0.01	-0.063
2017-02-08 01:02:26		2.019	2.752	-0.02	0	0.02	-0.063																0.431	0.45	-0.02	0	0.02	-0.063
2017-02-08 02:02:46		2.423	3.707	-0.03	0	0.01	-0.063																0.619	0.525	-0.03	0	0.01	-0.063
2017-02-08 03:02:43		2.827	4.483	-0.01	0.006	0.02	-0.063																0.619	0.75	-0.01	0.006	0.02	-0.063
2017-02-08 04:02:43		2.894	5.056	-0.02	0	0.01	-0.063																0.713	0.9	-0.02	0	0.01	-0.063
2017-02-08 05:02:43		3.231	5.527	-0.02	0.006	0.01	-0.063																0.9	0.975	-0.02	0.006	0.01	-0.063
2017-02-08 06:02:44		3.096	5.921	0	0.006	0.02	-0.063																0.9	1.125	0	0.006	0.02	-0.063
2017-02-08 07:02:43		2.625	6.28	0	0.006	0.01	-0.063																0.9	1.275	0	0.006	0.01	-0.063
2017-02-08 08:02:51		2.154	6.28	0.01	0.006	-0.01	-0.063																0.806	1.2	0.01	0.006	-0.01	-0.063
2017-02-08 09:02:43		1.683	6.123	0.01	0.006	-0.02	-0.063																0.806	1.275	0.01	0.006	-0.02	-0.063
2017-02-08 10:02:44		1.346	5.921	0.01	0.006	0	-0.063																0.806	1.35	0.01	0.006	0	-0.063
2017-02-08 11:04:05		2.692	5.28	0.01	0.006	0	-0.063																0.9	1.35	0.01	0.006	0	-0.063
2017-02-08 12:03:57		4.173	4.28	0.01	0.013	0	0																1.369	1.5	0.01	0.013	0	0
2017-02-08 13:04:04		5.048	2.775	0.02	0.013	-0.02	-0.063																2.025	1.725	0.02	0.013	-0.02	-0.063
2017-02-08 14:02:52		4.913	1.112	0.02	0.013	-0.01	0																2.681	1.95	0.02	0.013	-0.01	0
2017-02-08 15:02:50		4.375	0.202	0.02	0.013	0	0																3.338	2.175	0.02	0.013	0	0
2017-02-08 16:02:44		3.702	-0.157	0.02	0.019	0	0																3.713	2.25	0.02	0.019	0	0
2017-02-08 17:02:43		3.432	-0.202	0.02	0.025	0	0																3.713	2.1	0.02	0.025	0	0
2017-02-08 18:02:44		3.365	-0.191	0.04	0.031	0	0																3.619	2.1	0.04	0.031	0	0
2017-02-08 19:02:44		3.432	-0.169	0.04	0.044	0.02	-0.063																3.525	2.1	0.04	0.044	0.02	-0.063
2017-02-08 20:02:49		3.298	-0.18	0.06	0.05	-0.01	0																3.525	1.95	0.06	0.05	-0.01	0
2017-02-08 21:02:45		3.029	-0.213	0.06	0.056	0	0																3.338	1.875	0.06	0.056	0	0
2017-02-08 22:02:44		2.692	-0.247	0.06	0.069	0	0																3.338	1.8	0.06	0.069	0	0
2017-02-08 23:02:44		2.49	-0.258	0.07	0.069	0.01	-0.063																3.244	1.725	0.07	0.069	0.01	-0.063
2017-02-09 00:02:44		2.49	-0.247	0.07	0.075	0	0																3.15	1.65	0.07	0.075	0	0
2017-02-09 01:02:44		2.423	-0.258	0.08	0.075	0	0																3.056	1.65	0.08	0.075	0	0
2017-02-09 02:02:48		2.288	-0.258	0.09	0.081	-0.01	0																2.963	1.65	0.09	0.081	-0.01	0
2017-02-09 03:02:45		1.952	-0.315	0.08	0.081	0	0																2.869	1.5	0.08	0.081	0	0
2017-02-09 04:02:44		1.615	-0.348	0.09	0.088	0	0																2.681	1.425	0.09	0.088	0	0
2017-02-09 05:02:44		1.413	-0.348	0.1	0.081	0.01	0																2.588	1.35	0.1	0.081	0.01	0
2017-02-09 06:02:44		1.683	-0.303	0.09	0.081	0.01	0																2.494	1.275	0.09	0.081	0.01	0
2017-02-09 07:02:45		2.019	-0.27	0.08	0.088	0.01	0																2.4	1.2	0.08	0.088	0.01	0
2017-02-09 08:02:49		1.683	-0.011	0.08	0.088	0.01	0																2.4	1.35	0.08	0.088	0.01	0
2017-02-09 09:02:46		1.346	-0.034	0.08	0.088	0.01	0																2.306	1.275	0.08	0.088	0.01	0
2017-02-09 10:02:49		1.211	-0.371	0.07	0.088	0	0																2.213	1.05	0.07	0.088	0	0
2017-02-09 11:02:46		0.067	-0.517	0.08	0.088	-0.01	0																2.025	0.825	0.08	0.088	-0.01	0
2017-02-09 12:02:45		-0.269	-0.539	0.08	0.088	0	0																1.744	0.675	0.08	0.088	0	0
2017-02-09 13:02:46		0.067	-0.494	0.08	0.088	0.01	0																1.556	0.525	0.08	0.088	0.01	0
2017-02-09 14:02:48		0.606	-0.404	0.08	0.088	0.01	0																1.463	0.6	0.08	0.088	0.01	0
2017-02-09 15:02:47		1.346	-0.303	0.09	0.088	0.01	0																1.556	0.6	0.09	0.088	0.01	0
2017-02-09 16:02:47		1.481	-0.326	0.09	0.081	0.01	0																1.65	0.75	0.09	0.081	0.01	0
2017-02-09 17:02:43		0.942	-0.393	0.08	0.081	0	0																1.65	0.75	0.08	0.081	0	0
2017-02-09 18:02:41		0.269	-0.483	0.08	0.081	0.01	0																1.556	0.6	0.08	0.081	0.01	0
2017-02-09 19:02:43		-0.74	-0.562	0.08	0.075	0	0																1.181	0.225	0.08	0.075	0	0
2017-02-09 20:02:45		-1.481	-0.652	0.07	0.075	0.01	0																0.619	0.15	0.07	0.075	0.01	0
2017-02-09 21:02:46		-1.952	-0.685	0.06	0.075	-0.01	0.063																0.525	-0.225	0.06	0.075	-0.01	0.063
2017-02-09 22:02:42		-2.49	-0.741	0.06	0.069	0	0																-0.225	-0.3	0.06	0.069	0	0
2017-02-09 23:02:45		-2.961	-0.798	0.06	0.063	0	0.063																-0.694	-0.525	0.06	0.063	0	0.063
2017-02-10 00:02:47		-2.894	-1.034	0.05	0.063	0	0																-0.694	-0.9	0.05	0.063	0	0
2017-02-10 01:02:43		-3.096	-1.337	0.03	0.063	-0.01	0.063																-0.788	-1.125	0.03	0.063	-0.01	0.063
2017-02-10 02:02:51		-3.432	-1.685	0.02	0.056	0.01	0																-0.788	-1.35	0.02	0.056	0.01	0
2017-02-10 03:02:43		-2.894	-2.022	0.02	0.05	-0.01	0.063																-1.163	-1.275	0.02	0.05	-0.01	0.063
2017-02-10 04:02:46		-2.759	-2.472	0.02	0.05	0	0.063																-1.444	-1.275	0.02	0.05	0	0.063
2017-02-10 05:02:46		-2.625	-3.033	0	0.044	-0.01	0.063																-1.538	-1.35	0	0.044	-0.01	0.063
2017-02-10 06:02:52		-2.759	-3.685	-0.01	0.038	-0.01	0.063																-1.913	-1.275	-0.01	0.038	-0.01	0.063
2017-02-10 07:02:46		-2.692	-4.213	-0.01	0.031	0	0.063																-1.819	-1.425	-0.01	0.031	0	0.063
2017-02-10 08:02:51		-2.49	-4.528	-0.03	0.025	0.01	0.063																-1.444	-1.65	-0.03	0.025	0.01	0.063
2017-02-10 09:02:44		-1.952	-4.325	-0.03	0.025	0.02	0.063																-1.069	-1.65	-0.03	0.025	0.02	0.063
2017-02-10 10:02:46		-1.75	-3.528	-0.01	0.019	0.03	0.063																-1.069	-1.35	-0.01	0.019	0.03	0.063
2017-02-10 11:02:44		-1.952	-2.269	-0.02	0.013	0.03	0.063																-1.069	-1.125	-0.02	0.013	0.03	0.063
2017-02-10 12:02:44		-2.49	-0.82	-0.02	0.013	0.03	0.063																-1.256	-1.125	-0.02	0.013	0.03	0.063
2017-02-10 13:02:44		-2.288	-0.337	-0.04	0.013	0.03	0.063																-1.631	-1.275	-0.04	0.013	0.03	0.063
2017-02-10 14:02:49		-1.884	-0.303	-0.03	0.006	0.02	0.125																-1.631	-1.35	-0.03	0.006	0.02	0.125
2017-02-10 15:02:46		-1.683	-0.292	-0.05	0.006	0.01	0.125																-1.631	-1.35	-0.05	0.006	0.01	0.125
2017-02-10 16:02:44		-1.481	-0.27	-0.06	0	0.01	0.125																-1.538	-1.275	-0.06	0	0.01	0.125
2017-02-10 17:02:44		-1.279	-0.258	-0.04	0	0.03	0.125																-1.444	-1.125	-0.04	0	0.03	0.125
2017-02-10 18:02:44		-1.413	-0.258	-0.05	-0.006	0.01	0.125																-1.35	-1.125	-0.05	-0.006	0.01	0.125
2017-02-10 19:03:03		-1.346	-0.303	-0.05	-0.013	0.02	0.125																-1.444	-0.975	-0.05	-0.013	0.02	0.125
2017-02-10 20:02:48		-1.346	-0.303	-0.05	-0.013	0.02	0.125																-1.35	-0.9	-0.05	-0.013	0.02	0.125
2017-02-10 21:02:41		-1.615	-0.326	-0.06	-0.013	0.03	0.063																-1.725	-0.825	-0.06	-0.013	0.03	0.063
2017-02-10 22:02:45		-1.211	-0.461	-0.06	-0.019	0.02	0.125																-1.256	-1.05	-0.06	-0.019	0.02	0.125
2017-02-10 23:02:44		-0.673	-0.809	-0.05	-0.019	0.03	0.063																-1.069	-0.975	-0.05	-0.019	0.03	0.063
2017-02-11 00:02:44		-0.875	-1.079	-0.06	-0.025	0.02	0.125																-1.538	-0.675	-0.06	-0.025	0.02	0.125
2017-02-11 01:02:46		-0.673	-1.472	-0.06	-0.025	0.03	0.063																-1.444	-0.675	-0.06	-0.025	0.03	0.063
2017-02-11 02:02:49		-0.269	-1.944	-0.06	-0.019	0.02	0.125																-1.35	-0.525	-0.06	-0.019	0.02	0.125
2017-02-11 03:02:45		-0.808	-2.292	-0.07	-0.025	0.03	0.063																-1.256	-0.6	-0.07	-0.025	0.03	0.063
2017-02-11 04:02:45		-0.808	-2.314	-0.08	-0.031	0.02	0.125																-1.069	-0.6	-0.08	-0.031	0.02	0.125
2017-02-11 05:02:45		-1.01	-2.517	-0.08	-0.025	0.03	0.125																-1.256	-0.825	-0.08	-0.025	0.03	0.125
2017-02-11 06:02:45		-1.01	-2.236	-0.07	-0.031	0.04	0.125																-0.881	-0.975	-0.07	-0.031	0.04	0.125
2017-02-11 07:02:45		-0.606	-1.944	-0.08	-0.025	0.03	0.125																-0.319	-1.05	-0.08	-0.025	0.03	0.125
2017-02-11 08:02:50		0.067	-1.292	-0.04	-0.025	0.02	0.125																-0.225	-0.825	-0.04	-0.025	0.02	0.125
2017-02-11 09:02:41		0.337	-0.652	-0.05	-0.025	0.02	0.125																-0.506	-1.35	-0.05	-0.025	0.02	0.125
2017-02-11 11:04:07		0.337	-0.191	-0.06	-0.025	0.03	0.125																-0.413	-1.05	-0.06	-0.025	0.03	0.125
2017-02-11 11:04:07		0.673	0.213	-0.07	-0.019	0.03	0.125																-0.413	-0.75	-0.07	-0.019	0.03	0.125
2017-02-11 12:02:55		1.211	0.124	-0.07	-0.025	0.03	0.125																-0.413	-0.75	-0.07	-0.025	0.03	0.125
2017-02-11 13:02:46		1.346	-0.022	-0.05	-0.025	0.03	0.125																-0.225	-0.45	-0.05	-0.025	0.03	0.125
2017-02-11 14:02:53		1.077	-0.079	-0.06	-0.025	0.03	0.063																0.056	-0.3	-0.06	-0.025	0.03	0.063
2017-02-11 15:02:45		0.538	-0.135	-0.05	-0.025	0.04	0.063																0.15	0	-0.05	-0.025	0.04	0.063
2017-02-11 16:03:09		-0.135	-0.191	-0.05	-0.019	0.02	0.125																0.056	0	-0.05	-0.019	0.02	0.125
2017-02-11 17:02:46		-0.808	-0.247	-0.06	-0.025	0.02	0.063																-0.038	-0.45	-0.06	-0.025	0.02	0.063
2017-02-11 18:02:43		-1.346	-0.326	-0.05	-0.019	0	0.063																-0.319	-0.9	-0.05	-0.019	0	0.063
2017-02-11 19:03:05		-1.144	-0.292	-0.04	-0.019	0.02	0.125																-0.506	-1.05	-0.04	-0.019	0.02	0.125
2017-02-11 20:02:48		-0.875	-0.27	-0.05	-0.019	0.01	0.063																-0.506	-1.35	-0.05	-0.019	0.01	0.063
2017-02-11 21:02:44		-0.538	-0.225	-0.05	-0.019	0.02	0.125																-0.319	-1.35	-0.05	-0.019	0.02	0.125
2017-02-11 22:02:44		-0.269	-0.382	-0.05	-0.019	0.01	0.125																-0.319	-1.2	-0.05	-0.019	0.01	0.125
2017-02-11 23:02:45		0.202	-0.27	-0.04	-0.013	0.02	0.063																0.244	-1.05	-0.04	-0.013	0.02	0.063
2017-02-12 00:02:44		0.471	0.112	-0.03	-0.013	0.02	0.125																0.619	-1.05	-0.03	-0.013	0.02	0.125
2017-02-12 01:02:44		0.538	0.64	-0.02	-0.013	0.02	0.125																0.619	-0.6	-0.02	-0.013	0.02	0.125
2017-02-12 02:02:48		0.673	1.337	-0.02	-0.019	0.02	0.125																0.525	-0.45	-0.02	-0.019	0.02	0.125
2017-02-12 03:02:45		0.875	1.82	-0.02	-0.013	0.02	0.125																0.806	-0.45	-0.02	-0.013	0.02	0.125
2017-02-12 04:02:45		1.077	2.056	0	-0.013	0.03	0.063																0.994	-0.45	0	-0.013	0.03	0.063
2017-02-12 06:02:44		1.413	2.663	0.01	-0.013	0.02	0.063																1.369	0.15	0.01	-0.013	0.02	0.063
2017-02-12 07:02:46		1.615	2.887	0	0	0.02	0.063																1.369	0.6	0	0	0.02	0.063
2017-02-12 08:02:49		1.413	2.988	0.02	-0.013	0.02	0.063																0.806	1.2	0.02	-0.013	0.02	0.063
2017-02-12 09:02:42		1.077	3.101	-0.01	-0.006	0.03	0.063																0.431	1.35	-0.01	-0.006	0.03	0.063
2017-02-12 10:02:46		0.74	3.292	0.01	-0.013	0.02	0.063																0.431	1.5	0.01	-0.013	0.02	0.063
2017-02-12 11:02:43		2.019	3.236	-0.01	-0.006	0	0.063																0.525	1.05	-0.01	-0.006	0	0.063
2017-02-12 12:02:45		3.634	1.798	-0.01	-0.006	0.01	0.063																0.9	1.2	-0.01	-0.006	0.01	0.063
2017-02-12 13:02:51		4.173	0.449	-0.01	0	0.01	0.063																1.556	2.25	-0.01	0	0.01	0.063
2017-02-12 14:02:45		3.702	0.079	-0.02	0	0.01	0.063																2.213	3	-0.02	0	0.01	0.063
2017-02-12 15:02:44		3.365	0.034	-0.02	0.006	0.01	0.063																2.4	3.45	-0.02	0.006	0.01	0.063
2017-02-12 16:02:46		3.163	-0.022	0	0.006	0.01	0.063																2.4	3.6	0	0.006	0.01	0.063
2017-02-12 17:02:49		3.231	-0.022	0	0.013	0.04	0																2.494	3.6	0	0.013	0.04	0
2017-02-12 18:02:42		3.634	0	0.02	0.019	0.02	0.063																2.494	3.75	0.02	0.019	0.02	0.063
2017-02-12 19:02:48		4.779	0.112	0.02	0.019	0.05	0.063																2.775	4.2	0.02	0.019	0.05	0.063
2017-02-12 20:02:50		5.519	0.213	0.02	0.031	0.03	0																3.431	4.5	0.02	0.031	0.03	0
2017-02-12 21:02:43		6.057	0.258	0.04	0.031	0.04	0.063																3.9	4.8	0.04	0.031	0.04	0.063
2017-02-12 22:02:45		6.528	0.281	0.05	0.038	0.03	0																4.181	5.4	0.05	0.038	0.03	0
2017-02-12 23:02:43		6.394	0.595	0.05	0.05	0.04	0																4.463	5.7	0.05	0.05	0.04	0
2017-02-13 00:02:43		5.653	0.865	0.05	0.05	0.03	0.063																4.275	5.7	0.05	0.05	0.03	0.063
2017-02-13 01:02:46		5.115	0.91	0.06	0.056	0.03	0																4.275	5.55	0.06	0.056	0.03	0
2017-02-13 02:02:51		4.644	1.045	0.07	0.063	0.02	0																4.181	5.4	0.07	0.063	0.02	0
2017-02-13 03:02:43		3.971	1.101	0.07	0.069	0.03	0																4.088	4.95	0.07	0.069	0.03	0
2017-02-13 04:02:43		3.5	1.281	0.1	0.069	0.02	0																3.9	4.8	0.1	0.069	0.02	0
2017-02-13 05:02:42		3.029	1.505	0.08	0.081	0.03	0																3.713	4.35	0.08	0.081	0.03	0
2017-02-13 06:02:45		2.692	1.663	0.09	0.081	0.02	0																3.431	4.2	0.09	0.081	0.02	0
2017-02-13 07:02:45		2.692	1.842	0.1	0.081	0.02	0																3.338	3.9	0.1	0.081	0.02	0
2017-02-13 08:02:48		2.759	2.033	0.08	0.094	0.02	0																3.244	3.75	0.08	0.094	0.02	0
2017-02-13 09:02:43		2.894	1.696	0.1	0.088	0.02	0																3.244	3.45	0.1	0.088	0.02	0
2017-02-13 10:02:45		4.173	0.876	0.08	0.1	0.03	0																3.244	3.45	0.08	0.1	0.03	0
2017-02-13 11:02:45		3.836	-0.213	0.11	0.094	0.03	0																3.525	3.75	0.11	0.094	0.03	0
2017-02-13 12:02:44		2.625	-0.382	0.11	0.094	0.02	0.063																3.619	0.72	0.11	0.094	0.02	0.063
2017-02-13 13:02:45		2.625	-0.337	0.11	0.094	0.02	0																3.619	0.72	0.11	0.094	0.02	0
2017-02-13 14:02:49		2.49	-0.36	0.12	0.1	0.03	0																3.525	0.72	0.12	0.1	0.03	0
2017-02-13 15:03:07		1.952	-0.438	0.13	0.1	0.04	0.063																3.338	0.66	0.13	0.1	0.04	0.063
2017-02-13 16:02:46		0.673	-0.584	0.12	0.106	0.04	0.063																3.15	0.51	0.12	0.106	0.04	0.063
2017-02-13 17:02:41		0.135	-0.618	0.13	0.106	0.01	0.063																2.775	0.33	0.13	0.106	0.01	0.063
2017-02-13 18:02:44		0.269	-0.562	0.11	0.113	0.02	0.063																2.494	0.24	0.11	0.113	0.02	0.063
2017-02-13 19:02:44		0.673	-0.483	0.12	0.113	0.03	0.063																2.306	0.24	0.12	0.113	0.03	0.063
2017-02-13 20:02:48		1.077	-0.438	0.12	0.113	0.03	0.063																2.213	0.27	0.12	0.113	0.03	0.063
2017-02-13 21:02:44		1.279	-0.393	0.11	0.113	0.04	0.063																2.119	0.3	0.11	0.113	0.04	0.063
2017-02-13 22:02:44		1.279	-0.371	0.13	0.106	0.04	0.063																2.213	0.27	0.13	0.106	0.04	0.063
2017-02-13 23:02:45		1.481	-0.348	0.12	0.106	0.04	0.063																2.213	0.33	0.12	0.106	0.04	0.063
2017-02-14 00:02:44		1.683	-0.315	0.11	0.106	0.04	0.063																2.119	0.36	0.11	0.106	0.04	0.063
2017-02-14 01:02:45		2.019	-0.247	0.12	0.106	0.04	0.063																2.213	0.42	0.12	0.106	0.04	0.063
2017-02-14 02:02:49		2.221	-0.225	0.11	0.106	0.05	0.063																2.4	0.42	0.11	0.106	0.05	0.063
2017-02-14 03:02:42		2.625	-0.18	0.12	0.1	0.06	0.063																2.4	0.51	0.12	0.1	0.06	0.063
2017-02-14 04:02:45		2.961	-0.124	0.1	0.106	0.05	0.125																2.681	0.51	0.1	0.106	0.05	0.125
2017-02-14 05:02:45		3.163	-0.101	0.11	0.106	0.05	0.125																2.775	0.6	0.11	0.106	0.05	0.125
2017-02-14 06:02:46		3.298	-0.112	0.11	0.106	0.05	0.125																2.869	0.6	0.11	0.106	0.05	0.125
2017-02-14 07:02:46		3.096	-0.146	0.11	0.106	0.06	0.125																3.056	0.6	0.11	0.106	0.06	0.125
2017-02-14 08:02:50		2.692	-0.202	0.13	0.1	0.06	0.125																3.056	0.57	0.13	0.1	0.06	0.125
2017-02-14 09:02:42		2.086	-0.281	0.11	0.113	0.05	0.125																2.963	0.6	0.11	0.113	0.05	0.125
2017-02-14 10:04:06		0.606	-0.483	0.12	0.106	0.04	0.125																2.869	0.51	0.12	0.106	0.04	0.125
2017-02-14 11:04:07		-0.538	-0.584	0.11	0.113	0.04	0.125																2.4	0.36	0.11	0.113	0.04	0.125
2017-02-14 12:04:04		-0.673	-0.595	0.12	0.113	0.05	0.063																2.025	0.27	0.12	0.113	0.05	0.063
2017-02-14 13:05:28		-1.413	-0.674	0.12	0.113	0.04	0.188																1.65	0.03	0.12	0.113	0.04	0.188
2017-02-14 15:03:06		-1.884	-0.73	0.12	0.106	0.02	0.188																1.275	-0.15	0.12	0.106	0.02	0.188
2017-02-14 15:03:06		-2.288	-0.741	0.11	0.106	0.03	0.125																0.9	-0.27	0.11	0.106	0.03	0.125
2017-02-14 17:04:51		-1.346	-0.584	0.1	0.1	0.02	0.125																0.713	-0.33	0.1	0.1	0.02	0.125
2017-02-14 17:04:51		-0.875	-0.55	0.1	0.1	0.04	0.125																0.619	-0.3	0.1	0.1	0.04	0.125
2017-02-14 18:02:45		-1.077	-0.573	0.1	0.094	0.04	0.125																0.525	-0.24	0.1	0.094	0.04	0.125
2017-02-14 19:02:46		-1.481	-0.618	0.08	0.094	0.04	0.125																0.431	-0.33	0.08	0.094	0.04	0.125
2017-02-14 20:02:49		-1.615	-0.607	0.08	0.088	0.05	0.125																0.244	-0.3	0.08	0.088	0.05	0.125
2017-02-14 21:02:43		-1.548	-0.584	0.06	0.088	0.04	0.188																0.244	-0.36	0.06	0.088	0.04	0.188
2017-02-14 22:02:45		-1.481	-0.562	0.06	0.081	0.04	0.188																0.15	-0.33	0.06	0.081	0.04	0.188
2017-02-14 23:02:47		-1.548	-0.562	0.07	0.075	0.05	0.188																0.056	-0.39	0.07	0.075	0.05	0.188
2017-02-15 00:02:43		-1.548	-0.55	0.07	0.069	0.05	0.188																-0.038	-0.36	0.07	0.069	0.05	0.188
2017-02-15 01:02:48		-1.615	-0.55	0.05	0.069	0.05	0.188																-0.131	-0.42	0.05	0.069	0.05	0.188
2017-02-15 02:02:49		-1.817	-0.584	0.05	0.063	0.05	0.188																-0.225	-0.42	0.05	0.063	0.05	0.188
2017-02-15 03:02:44		-2.356	-0.629	0.04	0.063	0.02	0.25																-0.319	-0.51	0.04	0.063	0.02	0.25
2017-02-15 04:02:43		-2.894	-0.663	0.05	0.056	0.04	0.188																-0.6	-0.54	0.05	0.056	0.04	0.188
2017-02-15 05:02:46		-3.096	-0.674	0.05	0.05	0.03	0.188																-0.694	-0.63	0.05	0.05	0.03	0.188
2017-02-15 06:02:46		-3.5	-0.674	0.02	0.05	0.04	0.188																-0.881	-0.63	0.02	0.05	0.04	0.188
2017-02-15 07:02:46		-3.702	-0.697	0.02	0.044	0.04	0.188																-1.163	-0.72	0.02	0.044	0.04	0.188
2017-02-15 08:02:50		-3.231	-0.663	0.01	0.044	0.03	0.188																-1.256	-0.69	0.01	0.044	0.03	0.188
2017-02-15 09:02:43		-2.625	-0.584	0.02	0.031	0.05	0.188																-1.35	-0.75	0.02	0.031	0.05	0.188
2017-02-15 10:02:44		-1.548	-0.404	0.01	0.031	0.06	0.188																-1.35	-0.69	0.01	0.031	0.06	0.188
2017-02-15 11:02:44		-0.135	-0.225	0.01	0.025	0.05	0.25																-1.069	-0.6	0.01	0.025	0.05	0.25
2017-02-15 12:02:44		0.606	-0.135	0	0.025	0.06	0.25																-0.788	-0.45	0	0.025	0.06	0.25
2017-02-15 13:02:45		1.211	-0.09	0	0.019	0.07	0.188																-0.413	-0.27	0	0.019	0.07	0.188
2017-02-15 14:02:47		1.683	-0.011	-0.01	0.019	0.08	0.25																-0.038	-0.12	-0.01	0.019	0.08	0.25
2017-02-15 15:02:43		2.423	0.067	-0.01	0.019	0.07	0.188																0.338	0	-0.01	0.019	0.07	0.188
2017-02-15 17:02:44		2.49	0.034	0	0.019	0.07	0.25																0.619	0.009	0	0.019	0.07	0.25
2017-02-15 17:02:44		2.154	-0.034	-0.01	0.019	0.07	0.25																0.806	0.015	-0.01	0.019	0.07	0.25
2017-02-15 18:02:43		1.683	-0.112	0	0.019	0.07	0.25																0.994	0.009	0	0.019	0.07	0.25
2017-02-15 19:02:46		1.077	-0.191	0.01	0.019	0.06	0.25																1.088	0.009	0.01	0.019	0.06	0.25
2017-02-15 20:02:49		0.135	-0.326	0	0.019	0.05	0.25																0.9	-0.009	0	0.019	0.05	0.25
2017-02-15 21:02:45		-0.673	-0.416	0.02	0.019	0.06	0.188																0.525	-0.015	0.02	0.019	0.06	0.188
2017-02-15 22:02:44		-1.211	-0.472	-0.01	0.031	0.04	0.25																0.244	-0.024	-0.01	0.031	0.04	0.25
2017-02-15 23:02:44		-1.884	-0.472	0.01	0.025	0.04	0.25																0.244	-0.033	0.01	0.025	0.04	0.25
2017-02-16 00:02:43		-2.288	-0.528	0	0.031	0.04	0.25																0.056	-0.042	0	0.031	0.04	0.25
2017-02-16 01:02:44		-2.692	-0.55	-0.01	0.025	0.04	0.25																-0.225	-0.045	-0.01	0.025	0.04	0.25
2017-02-16 02:02:48		-2.692	-0.528	-0.01	0.025	0.05	0.25																-0.506	-0.051	-0.01	0.025	0.05	0.25
2017-02-16 03:02:45		-2.154	-0.472	0	0.025	0.06	0.188																-0.6	-0.054	0	0.025	0.06	0.188
2017-02-16 04:02:44		-1.279	-0.404	-0.02	0.025	0.06	0.188																-0.6	-0.048	-0.02	0.025	0.06	0.188
2017-02-16 05:02:45		-1.211	-0.382	-0.02	0.019	0.06	0.188																-0.694	-0.045	-0.02	0.019	0.06	0.188
2017-02-16 06:02:44		-1.144	-0.371	-0.01	0.019	0.06	0.25																-0.694	-0.048	-0.01	0.019	0.06	0.25
2017-02-16 07:02:44		-0.404	-0.315	-0.02	0.019	0.06	0.25																-0.506	-0.042	-0.02	0.019	0.06	0.25
2017-02-16 08:02:46		0.067	-0.202	-0.01	0.013	0.07	0.25																-0.506	-0.039	-0.01	0.013	0.07	0.25
2017-02-16 09:02:47		0.269	-0.191	-0.02	0.013	0.05	0.25																-0.319	-0.033	-0.02	0.013	0.05	0.25
2017-02-16 10:02:42		-0.135	-0.258	-0.02	0.013	0.04	0.313																-0.225	-0.033	-0.02	0.013	0.04	0.313
2017-02-16 11:02:46		-0.337	-0.292	-0.03	0.013	0.07	0.25																-0.225	-0.03	-0.03	0.013	0.07	0.25
2017-02-16 12:02:46		-0.067	-0.258	-0.03	0.006	0.06	0.25																-0.131	-0.03	-0.03	0.006	0.06	0.25
2017-02-16 13:02:45		-0.606	-0.315	-0.03	0.006	0.05	0.25																-0.038	-0.033	-0.03	0.006	0.05	0.25
2017-02-16 14:02:50		-0.942	-0.371	-0.02	0.006	0.05	0.188																-0.131	-0.036	-0.02	0.006	0.05	0.188
2017-02-16 15:02:43		-1.481	-0.416	-0.03	0.006	0.04	0.25																-0.319	-0.045	-0.03	0.006	0.04	0.25
2017-02-16 16:02:44		-1.615	-0.416	-0.04	0.006	0.05	0.188																-0.413	-0.051	-0.04	0.006	0.05	0.188
2017-02-16 17:02:43		-1.211	-0.337	-0.04	0.006	0.04	0.25																-0.413	-0.054	-0.04	0.006	0.04	0.25
2017-02-16 18:02:42		-0.538	-0.27	-0.05	0.006	0.04	0.25																-0.413	-0.048	-0.05	0.006	0.04	0.25
2017-02-16 19:02:45		-0.135	-0.225	-0.04	0.006	0.04	0.25																-0.413	-0.039	-0.04	0.006	0.04	0.25
2017-02-16 20:02:50		0.337	-0.157	-0.03	0.006	0.05	0.25																-0.131	-0.027	-0.03	0.006	0.05	0.25
2017-02-16 21:02:42		0.942	-0.101	-0.03	0.006	0.04	0.25																0.15	-0.018	-0.03	0.006	0.04	0.25
2017-02-16 22:02:46		1.683	-0.022	-0.02	0	0.07	0.25																0.431	-0.015	-0.02	0	0.07	0.25
2017-02-16 23:02:43		2.49	0.011	-0.03	0.006	0.07	0.188																0.431	-0.003	-0.03	0.006	0.07	0.188
2017-02-17 00:02:46		3.163	0.079	-0.02	0	0.07	0.25																0.713	0.003	-0.02	0	0.07	0.25
2017-02-17 01:02:45		3.769	0.135	-0.02	0.006	0.07	0.25																1.088	0.012	-0.02	0.006	0.07	0.25
2017-02-17 02:02:48		4.105	0.157	-0.01	0.006	0.06	0.25																1.463	0.021	-0.01	0.006	0.06	0.25
2017-02-17 03:02:44		4.173	0.169	-0.02	0.006	0.06	0.25																1.744	0.033	-0.02	0.006	0.06	0.25
2017-02-17 04:02:44		3.904	0.135	-0.01	0.013	0.06	0.25																1.931	0.036	-0.01	0.013	0.06	0.25
2017-02-17 05:02:44		4.105	0.135	-0.01	0.019	0.06	0.25																2.213	0.039	-0.01	0.019	0.06	0.25
2017-02-17 06:02:44		4.442	0.124	0	0.019	0.07	0.188																2.494	0.042	0	0.019	0.07	0.188
2017-02-17 07:02:42		3.904	0.09	0.01	0.025	0.06	0.188																2.494	0.051	0.01	0.025	0.06	0.188
2017-02-17 08:02:46		2.961	-0.056	0.01	0.031	0.05	0.25																2.588	0.048	0.01	0.031	0.05	0.25
2017-02-17 09:02:43		2.288	-0.135	0.02	0.038	0.05	0.25																2.494	0.045	0.02	0.038	0.05	0.25
2017-02-17 10:02:44		1.952	-0.18	0.02	0.038	0.06	0.188																2.4	0.039	0.02	0.038	0.06	0.188
2017-02-17 11:02:42		0.942	-0.303	0.03	0.044	0.04	0.188																2.306	0.027	0.03	0.044	0.04	0.188
2017-02-17 12:02:43		-0.471	-0.483	0.03	0.05	0.03	0.188																1.931	0.015	0.03	0.05	0.03	0.188
2017-02-17 13:02:46		-1.144	-0.55	0.04	0.05	0.04	0.188																1.463	-0.003	0.04	0.05	0.04	0.188
2017-02-17 14:02:52		-1.952	-0.618	0.03	0.05	0.03	0.25																0.994	-0.018	0.03	0.05	0.03	0.25
2017-02-17 15:02:44		-2.423	-0.663	0.05	0.056	0.04	0.25																0.619	-0.027	0.05	0.056	0.04	0.25
2017-02-17 16:02:44		-2.288	-0.618	0.05	0.05	0.05	0.25																0.15	-0.033	0.05	0.05	0.05	0.25
2017-02-17 17:02:45		-2.086	-0.573	0.05	0.05	0.05	0.188																-0.131	-0.036	0.05	0.05	0.05	0.188
2017-02-17 18:02:44		-1.75	-0.494	0.06	0.044	0.05	0.188																-0.225	-0.042	0.06	0.044	0.05	0.188
2017-02-17 19:02:44		-1.211	-0.404	0.03	0.044	0.06	0.188																-0.319	-0.042	0.03	0.044	0.06	0.188
2017-02-17 20:02:49		-0.673	-0.337	0.03	0.038	0.06	0.188																-0.319	-0.036	0.03	0.038	0.06	0.188
2017-02-17 21:02:42		-0.538	-0.315	0.01	0.038	0.06	0.188																-0.225	-0.036	0.01	0.038	0.06	0.188
2017-02-17 22:02:44		-0.673	-0.337	0.02	0.031	0.05	0.125																-0.131	-0.033	0.02	0.031	0.05	0.125
2017-02-17 23:02:44		-0.74	-0.337	0	0.031	0.04	0.25																-0.131	-0.033	0	0.031	0.04	0.25
2017-02-18 00:02:44		-0.875	-0.348	0	0.031	0.03	0.188																-0.038	-0.033	0	0.031	0.03	0.188
2017-02-18 01:02:44		-0.942	-0.371	0	0.025	0.04	0.188																-0.131	-0.033	0	0.025	0.04	0.188
2017-02-18 02:02:49		-1.01	-0.36	0	0.025	0.04	0.188																-0.225	-0.036	0	0.025	0.04	0.188
2017-02-18 03:02:41		-0.942	-0.348	-0.01	0.025	0.04	0.188																-0.225	-0.036	-0.01	0.025	0.04	0.188
2017-02-18 04:02:45		-0.875	-0.337	-0.01	0.019	0.05	0.188																-0.225	-0.036	-0.01	0.019	0.05	0.188
2017-02-18 05:02:45		-1.01	-0.348	-0.01	0.019	0.04	0.25																-0.319	-0.033	-0.01	0.019	0.04	0.25
2017-02-18 06:02:45		-0.942	-0.315	-0.01	0.019	0.03	0.25																-0.319	-0.033	-0.01	0.019	0.03	0.25
2017-02-18 07:02:44		-0.74	-0.292	-0.01	0.019	0.03	0.25																-0.319	-0.036	-0.01	0.019	0.03	0.25
2017-02-18 08:02:47		-0.606	-0.281	-0.01	0.013	0.04	0.188																-0.225	-0.039	-0.01	0.013	0.04	0.188
2017-02-18 09:02:41		-0.404	-0.236	-0.01	0.013	0.04	0.188																-0.319	-0.033	-0.01	0.013	0.04	0.188
2017-02-18 10:02:42		-0.404	-0.247	-0.02	0.013	0.03	0.188																-0.225	-0.033	-0.02	0.013	0.03	0.188
2017-02-18 11:02:44		-0.337	-0.225	-0.02	0.013	0.04	0.25																-0.225	-0.027	-0.02	0.013	0.04	0.25
2017-02-18 12:02:41		-0.202	-0.202	0	0.006	0.06	0.188																-0.131	-0.03	0	0.006	0.06	0.188
2017-02-18 13:02:41		-0.067	-0.169	-0.02	0.013	0.05	0.188																-0.038	-0.024	-0.02	0.013	0.05	0.188
2017-02-18 14:02:46		0.606	-0.067	-0.01	0.013	0.06	0.188																0.056	-0.027	-0.01	0.013	0.06	0.188
2017-02-18 15:02:42		1.413	0.022	-0.02	0.006	0.05	0.188																0.244	-0.018	-0.02	0.006	0.05	0.188
2017-02-18 16:02:45		2.154	0.09	-0.02	0.013	0.05	0.188																0.525	-0.003	-0.02	0.013	0.05	0.188
2017-02-18 17:02:45		1.952	0.034	-0.01	0.006	0.06	0.188																0.806	0	-0.01	0.006	0.06	0.188
2017-02-18 18:02:47		1.211	-0.079	-0.03	0.013	0.05	0.188																0.9	0.003	-0.03	0.013	0.05	0.188
2017-02-18 19:02:42		0.337	-0.213	-0.02	0.013	0.03	0.188																0.806	-0.006	-0.02	0.013	0.03	0.188
2017-02-18 20:02:49		-0.404	-0.315	-0.02	0.013	0.03	0.25																0.619	-0.015	-0.02	0.013	0.03	0.25
2017-02-18 21:02:42		-0.673	-0.326	-0.01	0.013	0.03	0.25																0.619	-0.024	-0.01	0.013	0.03	0.25
2017-02-18 22:02:45		-0.606	-0.303	-0.02	0.019	0.03	0.25																0.338	-0.024	-0.02	0.019	0.03	0.25
2017-02-18 23:02:46		-0.202	-0.247	0	0.013	0.04	0.188																0.338	-0.024	0	0.013	0.04	0.188
2017-02-19 00:02:46		0.135	-0.191	-0.01	0.019	0.05	0.188																0.244	-0.021	-0.01	0.019	0.05	0.188
2017-02-19 01:02:46		0.404	-0.146	0	0.019	0.04	0.188																0.338	-0.024	0	0.019	0.04	0.188
2017-02-19 02:02:50		0.673	-0.135	-0.01	0.019	0.04	0.188																0.431	-0.018	-0.01	0.019	0.04	0.188
2017-02-19 03:02:43		0.808	-0.112	-0.01	0.019	0.05	0.188																0.431	-0.015	-0.01	0.019	0.05	0.188
2017-02-19 04:02:46		0.875	-0.101	-0.01	0.019	0.04	0.188																0.525	-0.012	-0.01	0.019	0.04	0.188
2017-02-19 05:02:46		0.942	-0.09	-0.01	0.019	0.05	0.125																0.619	-0.012	-0.01	0.019	0.05	0.125
2017-02-19 06:02:47		0.875	-0.112	-0.01	0.019	0.05	0.125																0.713	-0.009	-0.01	0.019	0.05	0.125
2017-02-19 07:02:43		0.942	-0.112	-0.02	0.019	0.06	0.125																0.806	-0.009	-0.02	0.019	0.06	0.125
2017-02-19 08:02:50		1.077	-0.09	-0.01	0.019	0.05	0.188																0.806	-0.006	-0.01	0.019	0.05	0.188
2017-02-19 09:02:44		0.942	-0.124	-0.01	0.019	0.06	0.188																0.9	-0.006	-0.01	0.019	0.06	0.188
2017-02-19 10:02:43		0.673	-0.157	0	0.019	0.06	0.188																0.9	-0.003	0	0.019	0.06	0.188
2017-02-19 11:02:44		0.404	-0.213	0	0.019	0.05	0.125																0.806	-0.006	0	0.019	0.05	0.125
2017-02-19 12:02:43		0.067	-0.236	-0.02	0.025	0.03	0.188																0.806	-0.012	-0.02	0.025	0.03	0.188
2017-02-19 13:02:44		-0.404	-0.337	-0.01	0.025	0.04	0.188																0.525	-0.015	-0.01	0.025	0.04	0.188
2017-02-19 14:02:48		-1.279	-0.449	0	0.019	0.04	0.125																0.431	-0.018	0	0.019	0.04	0.125
2017-02-19 15:02:47		-1.817	-0.506	0	0.019	0.04	0.188																0.056	-0.03	0	0.019	0.04	0.188
2017-02-19 16:02:44		-2.827	-0.595	0	0.025	0.02	0.188																-0.225	-0.045	0	0.025	0.02	0.188
2017-02-19 17:02:46		-2.827	-0.55	-0.02	0.025	0.03	0.188																-0.6	-0.051	-0.02	0.025	0.03	0.188
2017-02-19 18:02:44		-2.086	-0.416	-0.01	0.004	0.03	0.188																-0.881	-0.255	-0.01	0.004	0.03	0.188
2017-02-19 19:02:43		-1.01	-0.27	0	0.025	0.05	0.188																-0.625	-0.113	0	0.025	0.05	0.188
2017-02-19 20:02:48		-0.135	-0.146	-0.01	0.038	0.05	0.125																-0.5	-0.098	-0.01	0.038	0.05	0.125
2017-02-19 21:02:45		0.269	-0.112	-0.01	0.025	0.05	0.125																-0.5	-0.068	-0.01	0.025	0.05	0.125
2017-02-19 22:02:44		0.202	-0.135	-0.01	0.013	0.05	0.125																-0.313	-0.06	-0.01	0.013	0.05	0.125
2017-02-19 23:02:44		-0.202	-0.191	-0.02	0.013	0.04	0.188																-0.25	-0.06	-0.02	0.013	0.04	0.188
2017-02-20 00:02:45		-0.673	-0.258	-0.02	0	0.03	0.188																-0.25	-0.068	-0.02	0	0.03	0.188
2017-02-20 01:02:44		-1.077	-0.292	-0.02	0	0.04	0.188																-0.313	-0.068	-0.02	0	0.04	0.188
2017-02-20 02:02:48		-1.481	-0.326	-0.03	0	0.04	0.188																-0.375	-0.083	-0.03	0	0.04	0.188
2017-02-20 03:02:45		-1.952	-0.371	-0.02	0	0.03	0.188																-0.438	-0.105	-0.02	0	0.03	0.188
2017-02-20 04:02:45		-2.154	-0.382	-0.02	0	0.03	0.188																-0.563	-0.113	-0.02	0	0.03	0.188
2017-02-20 05:02:44		-2.154	-0.36	-0.02	0	0.03	0.188																-0.625	-0.12	-0.02	0	0.03	0.188
2017-02-20 06:02:45		-2.086	-0.337	-0.03	-0.013	0.04	0.188																-0.813	-0.128	-0.03	-0.013	0.04	0.188
2017-02-20 07:02:45		-2.221	-0.326	-0.02	-0.013	0.03	0.188																-0.813	-0.135	-0.02	-0.013	0.03	0.188
2017-02-20 08:02:49		-2.288	-0.315	-0.03	0	0.03	0.188																-0.875	-0.135	-0.03	0	0.03	0.188
2017-02-20 09:02:47		-2.356	-0.326	-0.04	-0.013	0.02	0.188																-0.938	-0.143	-0.04	-0.013	0.02	0.188
2017-02-20 10:02:44		-2.356	-0.303	-0.03	-0.025	0.03	0.188																-1	-0.143	-0.03	-0.025	0.03	0.188
2017-02-20 11:02:48		-2.288	-0.191	-0.04	-0.025	0.03	0.188																-1	-0.15	-0.04	-0.025	0.03	0.188
2017-02-20 12:02:45		-1.884	-0.124	-0.04	-0.038	0.03	0.188																-1.063	-0.143	-0.04	-0.038	0.03	0.188
2017-02-20 13:02:45		-1.346	0.011	-0.04	-0.038	0.03	0.188																-1	-0.135	-0.04	-0.038	0.03	0.188
2017-02-20 14:02:52		-0.135	0.18	-0.06	-0.025	0.03	0.188																-0.938	-0.113	-0.06	-0.025	0.03	0.188
2017-02-20 15:02:42		0.337	0.247	-0.05	-0.038	0.04	0.125																-0.688	-0.09	-0.05	-0.038	0.04	0.125
2017-02-20 16:02:46		0.673	0.27	-0.06	-0.05	0.05	0.125																-0.438	-0.068	-0.06	-0.05	0.05	0.125
2017-02-20 17:02:42		0.538	0.236	-0.05	-0.05	0.03	0.125																-0.313	-0.06	-0.05	-0.05	0.03	0.125
2017-02-20 18:02:42		0	0.146	-0.05	-0.05	0.04	0.125																-0.188	-0.06	-0.05	-0.05	0.04	0.125
2017-02-20 19:02:42		-0.875	0.056	-0.06	-0.05	0.02	0.125																-0.25	-0.06	-0.06	-0.05	0.02	0.125
2017-02-20 20:02:48		-1.413	-0.045	-0.06	-0.05	0.02	0.188																-0.313	-0.075	-0.06	-0.05	0.02	0.188
2017-02-20 21:02:42		-1.884	-0.09	-0.06	-0.05	0.02	0.188																-0.438	-0.098	-0.06	-0.05	0.02	0.188
2017-02-20 22:02:45		-2.086	-0.112	-0.06	-0.038	0.02	0.188																-0.563	-0.113	-0.06	-0.038	0.02	0.188
2017-02-20 23:02:45		-2.019	-0.09	-0.06	-0.038	0.03	0.125																-0.75	-0.12	-0.06	-0.038	0.03	0.125
2017-02-21 00:02:45		-1.952	-0.079	-0.06	-0.038	0.04	0.063																-0.813	-0.12	-0.06	-0.038	0.04	0.063
2017-02-21 01:02:46		-1.817	-0.079	-0.07	-0.038	0.03	0.125																-0.875	-0.12	-0.07	-0.038	0.03	0.125
2017-02-21 02:02:50		-1.683	-0.056	-0.06	-0.038	0.03	0.125																-0.875	-0.135	-0.06	-0.038	0.03	0.125
2017-02-21 03:02:44		-1.481	-0.034	-0.07	-0.038	0.03	0.125																-0.938	-0.12	-0.07	-0.038	0.03	0.125
2017-02-21 04:02:43		-1.481	-0.034	-0.07	-0.05	0.02	0.125																-0.875	-0.128	-0.07	-0.05	0.02	0.125
2017-02-21 05:02:45		-1.481	-0.056	-0.07	-0.05	0.02	0.188																-0.938	-0.12	-0.07	-0.05	0.02	0.188
2017-02-21 06:02:46		-1.615	-0.067	-0.07	-0.05	0.02	0.125																-0.875	-0.128	-0.07	-0.05	0.02	0.125
2017-02-21 07:02:43		-1.683	-0.112	-0.08	-0.063	0.01	0.188																-1	-0.128	-0.08	-0.063	0.01	0.188
2017-02-21 08:02:50		-1.683	-0.124	-0.09	-0.063	0.02	0.063																-1	-0.135	-0.09	-0.063	0.02	0.063
2017-02-21 09:02:42		-1.211	-0.011	-0.09	-0.063	0.03	0.063																-0.938	-0.143	-0.09	-0.063	0.03	0.063
2017-02-21 10:02:49		0.067	0.191	-0.08	-0.063	0.03	0.125																-0.875	-0.128	-0.08	-0.063	0.03	0.125
2017-02-21 12:04:21		1.75	0.337	-0.08	-0.075	0.03	0.125																-0.688	-0.09	-0.08	-0.075	0.03	0.125
2017-02-21 12:04:22		2.894	0.461	-0.08	-0.063	0.04	0.063																-0.375	-0.038	-0.08	-0.063	0.04	0.063
2017-02-21 14:02:51		3.904	0.562	-0.08	-0.075	0.03	0.125																0.063	0.015	-0.08	-0.075	0.03	0.125
2017-02-21 14:02:51		4.173	0.562	-0.07	-0.075	0.04	0.125																0.438	0.06	-0.07	-0.075	0.04	0.125
2017-02-21 15:02:50		4.577	0.584	-0.08	-0.063	0.03	0.125																0.75	0.098	-0.08	-0.063	0.03	0.125
2017-02-21 16:02:51		4.509	0.562	-0.07	-0.063	0.04	0.125																1	0.105	-0.07	-0.063	0.04	0.125
2017-02-21 17:03:05		4.307	0.506	-0.06	-0.05	0.05	0.125																1.188	0.12	-0.06	-0.05	0.05	0.125
2017-02-21 18:02:46		3.971	0.416	-0.06	-0.038	0.04	0.125																1.313	0.12	-0.06	-0.038	0.04	0.125
2017-02-21 19:02:45		3.769	0.337	-0.05	-0.013	0.04	0.125																1.375	0.113	-0.05	-0.013	0.04	0.125
2017-02-21 20:04:47		3.432	0.303	-0.04	-0.013	0.04	0.063																1.438	0.098	-0.04	-0.013	0.04	0.063
2017-02-21 21:02:47		3.231	0.247	-0.03	0	0.04	0.063																1.438	0.098	-0.03	0	0.04	0.063
2017-02-21 22:02:50		2.961	0.202	-0.03	0.013	0.04	0.063																1.375	0.083	-0.03	0.013	0.04	0.063
2017-02-21 23:02:51		2.423	0.124	-0.01	0.013	0.01	0.063																1.375	0.083	-0.01	0.013	0.01	0.063
2017-02-22 00:02:48		2.288	0.09	-0.02	0.025	0.03	0.125																1.313	0.06	-0.02	0.025	0.03	0.125
2017-02-22 01:02:47		2.086	0.056	0	0.038	0.03	0.063																1.313	0.053	0	0.038	0.03	0.063
2017-02-22 02:02:55		2.019	0.045	0	0.038	0.03	0.063																1.188	0.06	0	0.038	0.03	0.063
2017-02-22 03:02:42		2.019	0.034	0.01	0.038	0.03	0.063																1.188	0.045	0.01	0.038	0.03	0.063
2017-02-22 04:02:45		2.086	0.045	0.01	0.05	0.03	0.125																1.125	0.045	0.01	0.05	0.03	0.125
2017-02-22 05:02:45		2.086	0.056	0	0.05	0.04	0																1.125	0.03	0	0.05	0.04	0
2017-02-22 06:02:45		2.086	0.034	0.01	0.063	0.03	0.063																1.125	0.038	0.01	0.063	0.03	0.063
2017-02-22 07:02:45		2.086	0.056	0.01	0.063	0.04	0																1.188	0.03	0.01	0.063	0.04	0
2017-02-22 08:02:49		2.221	0.079	0.02	0.063	0.03	0.125																1.188	0.038	0.02	0.063	0.03	0.125
2017-02-22 09:02:42		2.49	0.101	0.02	0.063	0.03	0.125																1.188	0.045	0.02	0.063	0.03	0.125
2017-02-22 10:02:47		2.423	0.056	0.01	0.075	0.02	0.063																1.25	0.038	0.01	0.075	0.02	0.063
2017-02-22 11:03:27		2.356	0.067	0.01	0.088	0.02	0.063																1.25	0.038	0.01	0.088	0.02	0.063
2017-02-22 12:04:01		2.558	0.101	0.02	0.075	0.02	0.125																1.313	0.053	0.02	0.075	0.02	0.125
2017-02-22 13:03:04		2.692	0.09	0.02	0.088	0.03	0.063																1.313	0.053	0.02	0.088	0.03	0.063
2017-02-22 14:03:33		2.827	0.112	0.01	0.088	0.04	0.063																1.375	0.06	0.01	0.088	0.04	0.063
2017-02-22 15:03:15		2.894	0.124	0.02	0.1	0.05	0.063																1.5	0.068	0.02	0.1	0.05	0.063
2017-02-22 16:02:47		3.029	0.112	0.02	0.1	0.04	0.063																1.5	0.083	0.02	0.1	0.04	0.063
2017-02-22 17:02:42		2.894	0.079	0.03	0.1	0.04	0.063																1.563	0.068	0.03	0.1	0.04	0.063
2017-02-22 18:02:45		3.029	0.09	0.04	0.113	0.04	0.063																1.625	0.068	0.04	0.113	0.04	0.063
2017-02-22 19:02:59		3.029	0.101	0.04	0.113	0.04	0.063																1.688	0.068	0.04	0.113	0.04	0.063
2017-02-22 20:02:47		3.231	0.112	0.05	0.113	0.04	0.063																1.688	0.083	0.05	0.113	0.04	0.063
2017-02-22 21:02:43		3.231	0.124	0.05	0.125	0.03	0.063																1.75	0.083	0.05	0.125	0.03	0.063
2017-02-22 22:02:43		3.163	0.101	0.06	0.125	0.04	0.063																1.813	0.09	0.06	0.125	0.04	0.063
2017-02-22 23:02:42		3.096	0.079	0.06	0.138	0.06	0.063																1.875	0.075	0.06	0.138	0.06	0.063
2017-02-23 00:02:46		2.894	0.056	0.08	0.15	0.04	0.063																1.875	0.083	0.08	0.15	0.04	0.063
2017-02-23 01:02:46		2.692	0.056	0.07	0.138	0.04	0.063																1.813	0.075	0.07	0.138	0.04	0.063
2017-02-23 02:02:51		2.692	0.034	0.08	0.15	0.04	0.063																1.875	0.068	0.08	0.15	0.04	0.063
2017-02-23 03:02:46		2.558	0.022	0.07	0.163	0.04	0.063																1.875	0.06	0.07	0.163	0.04	0.063
2017-02-23 04:02:47		2.019	-0.067	0.08	0.163	0.05	0																1.813	0.053	0.08	0.163	0.05	0
2017-02-23 05:02:44		1.481	-0.135	0.09	0.163	0.03	0.125																1.75	0.038	0.09	0.163	0.03	0.125
2017-02-23 06:02:45		1.817	-0.09	0.09	0.163	0.03	0.125																1.688	0.03	0.09	0.163	0.03	0.125
2017-02-23 07:02:43		2.086	-0.056	0.1	0.175	0.05	0.125																1.625	0.038	0.1	0.175	0.05	0.125
2017-02-23 08:02:50		2.019	-0.079	0.1	0.175	0.05	0.063																1.625	0.03	0.1	0.175	0.05	0.063
2017-02-23 09:02:43		1.279	-0.213	0.1	0.188	0.04	0.063																1.563	0.023	0.1	0.188	0.04	0.063
2017-02-23 10:03:20		0.269	-0.36	0.1	0.175	0.05	0.063																1.438	0	0.1	0.175	0.05	0.063
2017-02-23 12:03:18		-1.01	-0.573	0.1	0.175	0.05	0.063																1.25	-0.03	0.1	0.175	0.05	0.063
2017-02-23 12:03:18		-2.692	-0.798	0.09	0.188	0.04	0.063																0.875	-0.09	0.09	0.188	0.04	0.063
2017-02-23 13:02:45		-4.173	-0.977	0.09	0.175	0.03	0.063																0.438	-0.158	0.09	0.175	0.03	0.063
2017-02-23 14:02:57		-5.182	-1.09	0.09	0.175	0.02	0.063																-0.063	-0.225	0.09	0.175	0.02	0.063
2017-02-23 15:03:17		-5.855	-1.146	0.07	0.163	0.01	0.063																-0.563	-0.293	0.07	0.163	0.01	0.063
2017-02-23 16:03:28		-6.057	-1.146	0.07	0.163	0.01	0.063																-1	-0.33	0.07	0.163	0.01	0.063
2017-02-23 17:02:53		-5.923	-1.09	0.05	0.15	0.01	0.063																-1.313	-0.345	0.05	0.15	0.01	0.063
2017-02-23 18:02:51		-5.653	-1.011	0.03	0.125	0	0.125																-1.563	-0.353	0.03	0.125	0	0.125
2017-02-23 19:02:47		-5.317	-0.944	0.03	0.1	0.01	0.125																-1.688	-0.353	0.03	0.1	0.01	0.125
2017-02-23 20:02:54		-5.115	-0.888	0.01	0.1	0.01	0.125																-1.75	-0.353	0.01	0.1	0.01	0.125
2017-02-23 21:02:41		-5.048	-0.843	-0.01	0.075	0.03	0.125																-1.875	-0.345	-0.01	0.075	0.03	0.125
2017-02-23 22:02:45		-5.048	-0.809	-0.01	0.05	0.01	0.125																-1.938	-0.353	-0.01	0.05	0.01	0.125
2017-02-23 23:02:41		-4.98	-0.775	-0.03	0.038	0.02	0.125																-2	-0.345	-0.03	0.038	0.02	0.125
2017-02-24 00:02:44		-4.846	-0.741	-0.06	0.013	0.02	0.125																-2	-0.345	-0.06	0.013	0.02	0.125
2017-02-24 01:02:44		-4.644	-0.741	-0.06	0.013	0.02	0.125																-2	-0.338	-0.06	0.013	0.02	0.125
2017-02-24 02:02:48		-4.779	-0.73	-0.07	0	0.01	0.188																-2.063	-0.345	-0.07	0	0.01	0.188
2017-02-24 03:02:45		-4.913	-0.719	-0.07	-0.025	0.02	0.125																-2.125	-0.33	-0.07	-0.025	0.02	0.125
2017-02-24 04:02:44		-4.711	-0.685	-0.09	-0.038	0.01	0.188																-2.125	-0.33	-0.09	-0.038	0.01	0.188
2017-02-24 05:02:45		-4.442	-0.64	-0.1	-0.038	0.03	0.125																-2.125	-0.323	-0.1	-0.038	0.03	0.125
2017-02-24 06:02:45		-4.98	-0.674	-0.12	-0.05	0.02	0.125																-2.188	-0.33	-0.12	-0.05	0.02	0.125
2017-02-24 07:02:45		-5.452	-0.73	-0.13	-0.063	0.01	0.125																-2.25	-0.338	-0.13	-0.063	0.01	0.125
2017-02-24 08:02:50		-4.98	-0.764	-0.14	-0.075	0.01	0.125																-2.5	-0.338	-0.14	-0.075	0.01	0.125
2017-02-24 09:02:46		-4.173	-0.607	-0.14	-0.088	0.02	0.125																-2.313	-0.338	-0.14	-0.088	0.02	0.125
2017-02-24 10:02:43		-2.894	-0.404	-0.13	-0.088	0.03	0.125																-2.25	-0.323	-0.13	-0.088	0.03	0.125
2017-02-24 11:03:51		-1.548	-0.213	-0.14	-0.1	0.02	0.188																-2.063	-0.3	-0.14	-0.1	0.02	0.188
2017-02-24 12:02:29		0	0.011	-0.14	-0.113	0.04	0.188																-1.75	-0.263	-0.14	-0.113	0.04	0.188
2017-02-24 13:02:42		1.548	0.202	-0.15	-0.113	0.04	0.188																-1.375	-0.203	-0.15	-0.113	0.04	0.188
2017-02-24 14:02:49		2.625	0.303	-0.15	-0.113	0.04	0.188																-0.875	-0.15	-0.15	-0.113	0.04	0.188
2017-02-24 15:02:44		3.163	0.337	-0.14	-0.125	0.04	0.188																-0.5	-0.09	-0.14	-0.125	0.04	0.188
2017-02-24 16:03:00		3.163	0.315	-0.14	-0.113	0.04	0.188																-0.125	-0.06	-0.14	-0.113	0.04	0.188
2017-02-24 17:02:45		3.096	0.292	-0.13	-0.113	0.04	0.188																0.188	-0.038	-0.13	-0.113	0.04	0.188
2017-02-24 18:02:45		2.759	0.225	-0.12	-0.1	0.05	0.125																0.375	-0.03	-0.12	-0.1	0.05	0.125
2017-02-24 19:02:43		2.356	0.157	-0.12	-0.088	0.04	0.125																0.438	-0.038	-0.12	-0.088	0.04	0.125
2017-02-24 20:04:07		1.884	0.079	-0.11	-0.088	0.04	0.125																0.5	-0.045	-0.11	-0.088	0.04	0.125
2017-02-24 21:02:42		1.884	0.056	-0.09	-0.075	0.03	0.125																0.563	-0.045	-0.09	-0.075	0.03	0.125
2017-02-24 22:02:44		2.288	0.079	-0.1	-0.063	0.04	0.188																0.625	-0.045	-0.1	-0.063	0.04	0.188
2017-02-24 23:02:43		2.827	0.135	-0.1	-0.038	0.03	0.188																0.688	-0.03	-0.1	-0.038	0.03	0.188
2017-02-25 00:02:43		3.163	0.169	-0.07	-0.038	0.03	0.188																0.75	-0.015	-0.07	-0.038	0.03	0.188
2017-02-25 01:02:43		3.365	0.202	-0.07	-0.025	0.04	0.188																0.875	-0.015	-0.07	-0.025	0.04	0.188
2017-02-25 02:02:46		3.567	0.202	-0.06	-0.025	0.04	0.125																0.938	0.015	-0.06	-0.025	0.04	0.125
2017-02-25 03:02:44		3.769	0.202	-0.07	0	0.04	0.188																1.063	0.015	-0.07	0	0.04	0.188
2017-02-25 04:02:43		4.105	0.236	-0.04	0	0.04	0.125																1.188	0.023	-0.04	0	0.04	0.125
2017-02-25 05:02:46		4.577	0.27	-0.04	0	0.04	0.125																1.313	0.038	-0.04	0	0.04	0.125
2017-02-25 06:02:46		4.98	0.303	-0.02	0.013	0.04	0.125																1.5	0.053	-0.02	0.013	0.04	0.125
2017-02-25 07:02:46		5.25	0.326	-0.01	0.025	0.04	0.125																1.625	0.075	-0.01	0.025	0.04	0.125
2017-02-25 08:02:49		4.846	0.371	-0.01	0.038	0.04	0.125																1.938	0.075	-0.01	0.038	0.04	0.125
2017-02-25 09:02:43		4.442	0.292	0	0.038	0.05	0.125																1.813	0.083	0	0.038	0.05	0.125
2017-02-25 10:02:45		3.836	0.18	-0.01	0.05	0.02	0.188																1.875	0.083	-0.01	0.05	0.02	0.188
2017-02-25 11:04:04		3.365	0.101	0.01	0.063	0.04	0.063																1.875	0.075	0.01	0.063	0.04	0.063
2017-02-25 12:02:34		3.096	0.034	0.01	0.075	0.03	0.063																1.875	0.068	0.01	0.075	0.03	0.063
2017-02-25 13:02:44		2.759	0	0.02	0.075	0.03	0.063																1.813	0.068	0.02	0.075	0.03	0.063
2017-02-25 14:02:49		2.49	-0.034	0.04	0.075	0.03	0.125																1.688	0.068	0.04	0.075	0.03	0.125
2017-02-25 15:02:44		2.558	-0.011	0.03	0.1	0.04	0.125																1.688	0.06	0.03	0.1	0.04	0.125
2017-02-25 16:03:15		2.827	0.011	0.03	0.1	0.03	0.125																1.688	0.06	0.03	0.1	0.03	0.125
2017-02-25 17:02:45		2.894	0.011	0.03	0.113	0.03	0.125																1.688	0.06	0.03	0.113	0.03	0.125
2017-02-25 18:02:44		2.827	0	0.05	0.113	0.03	0.125																1.688	0.06	0.05	0.113	0.03	0.125
2017-02-25 19:02:44		2.827	-0.011	0.05	0.125	0.04	0.125																1.688	0.06	0.05	0.125	0.04	0.125
2017-02-25 20:02:47		2.961	0.011	0.05	0.125	0.03	0.125																1.688	0.06	0.05	0.125	0.03	0.125
2017-02-25 21:02:45		2.827	-0.022	0.05	0.138	0.03	0.125																1.688	0.06	0.05	0.138	0.03	0.125
2017-02-25 22:02:44		2.558	-0.045	0.06	0.138	0.03	0.063																1.688	0.06	0.06	0.138	0.03	0.063
2017-02-25 23:02:44		2.154	-0.112	0.06	0.138	0.03	0.063																1.625	0.045	0.06	0.138	0.03	0.063
2017-02-26 00:02:44		1.884	-0.135	0.06	0.15	0.03	0.063																1.625	0.03	0.06	0.15	0.03	0.063
2017-02-26 01:02:46		1.75	-0.157	0.06	0.15	0.02	0.063																1.5	0.038	0.06	0.15	0.02	0.063
2017-02-26 02:02:45		1.817	-0.146	0.06	0.15	0.03	0.063																1.563	0.023	0.06	0.15	0.03	0.063
2017-02-26 03:02:45		2.019	-0.135	0.08	0.138	0.01	0.125																1.5	0.023	0.08	0.138	0.01	0.125
2017-02-26 04:02:44		2.019	-0.112	0.05	0.163	0.03	0.125																1.5	0.015	0.05	0.163	0.03	0.125
2017-02-26 05:02:44		2.019	-0.112	0.07	0.163	0.02	0.125																1.5	0.023	0.07	0.163	0.02	0.125
2017-02-26 06:02:43		1.817	-0.146	0.07	0.163	0.02	0.125																1.438	0.023	0.07	0.163	0.02	0.125
2017-02-26 07:02:41		1.683	-0.169	0.07	0.163	0.02	0.125																1.438	0.008	0.07	0.163	0.02	0.125
2017-02-26 08:02:51		1.75	-0.157	0.07	0.163	0.03	0.125																1.438	0.008	0.07	0.163	0.03	0.125
2017-02-26 09:02:46		2.019	-0.124	0.06	0.163	0.02	0.125																1.438	0.008	0.06	0.163	0.02	0.125
2017-02-26 10:02:47		1.952	-0.146	0.06	0.163	0.04	0.063																1.438	0.008	0.06	0.163	0.04	0.063
2017-02-26 12:02:30		2.154	-0.09	0.06	0.163	0.04	0.125																1.438	0.023	0.06	0.163	0.04	0.125
2017-02-26 12:02:30		2.086	-0.146	0.06	0.163	0.03	0.125																1.375	0.015	0.06	0.163	0.03	0.125
2017-02-26 13:02:45		1.077	-0.292	0.05	0.175	0.04	0.125																1.438	-0.023	0.05	0.175	0.04	0.125
2017-02-26 14:02:52		0.337	-0.393	0.05	0.175	0.02	0.063																1.313	-0.053	0.05	0.175	0.02	0.063
2017-02-26 15:02:48		-1.077	-0.607	0.06	0.163	0.01	0.125																1.063	-0.083	0.06	0.163	0.01	0.125
2017-02-26 16:02:48		-1.952	-0.674	0.06	0.163	0.02	0.125																0.75	-0.113	0.06	0.163	0.02	0.125
2017-02-26 17:02:46		-1.817	-0.629	0.05	0.163	0.02	0.125																0.438	-0.128	0.05	0.163	0.02	0.125
2017-02-26 18:02:45		-1.144	-0.517	0.04	0.163	0.03	0.125																0.25	-0.135	0.04	0.163	0.03	0.125
2017-02-26 19:02:45		-0.269	-0.326	0.04	0.15	0.02	0.125																0.313	-0.12	0.04	0.15	0.02	0.125
2017-02-26 20:02:49		0.135	-0.135	0.04	0.15	0.03	0.125																0.25	-0.105	0.04	0.15	0.03	0.125
2017-02-26 21:02:46		0.404	0.258	0.03	0.15	0.02	0.125																0.375	-0.105	0.03	0.15	0.02	0.125
2017-02-26 22:02:46		0.673	0.753	0.03	0.15	0.03	0.125																0.375	-0.083	0.03	0.15	0.03	0.125
2017-02-26 23:02:45		1.01	1.258	0.03	0.125	0.03	0.188																0.5	-0.075	0.03	0.125	0.03	0.188
2017-02-27 00:02:45		1.077	1.64	0.02	0.125	0.04	0.188																0.563	-0.068	0.02	0.125	0.04	0.188
2017-02-27 01:02:44		1.01	1.876	0.03	0.113	0.03	0.188																0.688	-0.068	0.03	0.113	0.03	0.188
2017-02-27 02:02:47		0.875	2.056	0.02	0.125	0.04	0.188																0.625	-0.06	0.02	0.125	0.04	0.188
2017-02-27 03:02:42		0.673	2.202	0.03	0.125	0.05	0.125																0.688	-0.068	0.03	0.125	0.05	0.125
2017-02-27 04:02:46		0.538	2.427	0.04	0.113	0.05	0.125																0.688	-0.06	0.04	0.113	0.05	0.125
2017-02-27 05:02:42		0.269	2.584	0.03	0.113	0.04	0.125																0.625	-0.068	0.03	0.113	0.04	0.125
2017-02-27 06:02:45		0.135	2.764	0.02	0.113	0.06	0.125																0.563	-0.075	0.02	0.113	0.06	0.125
2017-02-27 07:02:48		0.067	2.932	0.01	0.113	0.04	0.188																0.563	-0.075	0.01	0.113	0.04	0.188
2017-02-27 08:02:47		-0.269	3.045	0.02	0.113	0.03	0.188																0.5	-0.083	0.02	0.113	0.03	0.188
2017-02-27 09:02:45		-1.077	3.056	0.02	0.125	0.03	0.188																0.375	-0.083	0.02	0.125	0.03	0.188
2017-02-27 10:02:46		-1.548	3.179	0.02	0.113	0.04	0.188																0.25	-0.098	0.02	0.113	0.04	0.188
2017-02-27 11:03:53		-2.154	3.202	0.01	0.113	0.02	0.188																0.125	-0.128	0.01	0.113	0.02	0.188
2017-02-27 12:02:27		-2.625	3.325	0.02	0.113	0.03	0.188																-0.063	-0.135	0.02	0.113	0.03	0.188
2017-02-27 13:02:43		-1.817	3.539	0.02	0.1	0.02	0.188																-0.25	-0.128	0.02	0.1	0.02	0.188
2017-02-27 14:02:56		-1.884	3.618	0.01	0.1	0.03	0.188																-0.25	-0.128	0.01	0.1	0.03	0.188
2017-02-27 15:02:45		-1.077	3.808	0.01	0.1	0.03	0.125																-0.25	-0.128	0.01	0.1	0.03	0.125
2017-02-27 16:03:57		-0.538	3.898	0	0.1	0.04	0.188																-0.188	-0.113	0	0.1	0.04	0.188
2017-02-27 17:03:01		-0.538	3.91	0	0.088	0.04	0.188																-0.063	-0.113	0	0.088	0.04	0.188
2017-02-27 18:02:43		-0.74	3.887	0.01	0.075	0.04	0.188																0	-0.098	0.01	0.075	0.04	0.188
2017-02-27 19:02:44		-1.01	3.786	-0.01	0.075	0.04	0.188																-0.125	-0.098	-0.01	0.075	0.04	0.188
2017-02-27 20:02:54		-1.01	3.651	-0.02	0.075	0.05	0.188																-0.063	-0.098	-0.02	0.075	0.05	0.188
2017-02-27 21:02:43		-0.808	3.314	-0.01	0.063	0.05	0.188																-0.125	-0.098	-0.01	0.063	0.05	0.188
2017-02-27 22:02:43		-0.74	2.854	-0.01	0.063	0.05	0.188																-0.125	-0.098	-0.01	0.063	0.05	0.188
2017-02-27 23:02:43		-0.808	2.393	0	0.063	0.06	0.125																-0.125	-0.105	0	0.063	0.06	0.125
2017-02-28 00:02:43		-0.673	2.045	-0.01	0.063	0.04	0.188																-0.188	-0.09	-0.01	0.063	0.04	0.188
2017-02-28 01:02:43		-0.404	1.842	-0.02	0.063	0.05	0.188																-0.188	-0.09	-0.02	0.063	0.05	0.188
2017-02-28 02:02:47		-0.067	1.708	-0.02	0.05	0.05	0.188																-0.125	-2.25	-0.02	0.05	0.05	0.188
2017-02-28 03:02:43		0.269	1.595	-0.02	0.05	0.04	0.188																-0.063	-0.413	-0.02	0.05	0.04	0.188
2017-02-28 04:02:44		0.74	1.404	-0.03	0.05	0.03	0.25																0	-0.338	-0.03	0.05	0.03	0.25
2017-02-28 05:02:43		0.942	1.247	-0.03	0.05	0.05	0.25																0.125	-0.3	-0.03	0.05	0.05	0.25
2017-02-28 06:02:43		1.077	1.067	-0.02	0.05	0.04	0.25																0.25	-0.225	-0.02	0.05	0.04	0.25
2017-02-28 07:02:42		1.144	0.899	-0.02	0.05	0.05	0.188																0.313	-0.15	-0.02	0.05	0.05	0.188
2017-02-28 08:02:49		1.144	0.719	-0.03	0.05	0.05	0.188																0.313	-0.075	-0.03	0.05	0.05	0.188
2017-02-28 09:02:44		1.077	0.584	-0.02	0.05	0.06	0.188																0.438	-0.113	-0.02	0.05	0.06	0.188
2017-02-28 10:03:15		0.337	0.281	-0.02	0.05	0.04	0.188																0.438	-0.075	-0.02	0.05	0.04	0.188
2017-02-28 11:03:10		-1.01	-0.022	-0.02	0.05	0.05	0.188																0.25	-0.113	-0.02	0.05	0.05	0.188
2017-02-28 12:03:30		-2.221	-0.315	-0.03	0.05	0.03	0.25																0.063	-0.3	-0.03	0.05	0.03	0.25
2017-02-28 13:02:52		-3.702	-0.584	-0.01	0.05	0.04	0.25																-0.25	-0.525	-0.01	0.05	0.04	0.25
2017-02-28 14:02:48		-4.509	-0.73	-0.03	0.05	0.05	0.25																-0.688	-0.713	-0.03	0.05	0.05	0.25
2017-02-28 15:03:15		-4.98	-0.843	-0.04	0.05	0.04	0.25																-1.063	-0.863	-0.04	0.05	0.04	0.25
2017-02-28 16:02:42		-5.384	-0.899	-0.03	0.025	0.04	0.188																-1.375	-1.088	-0.03	0.025	0.04	0.188
2017-02-28 17:04:20		-5.317	-0.899	-0.04	0.038	0.03	0.25																-1.688	-1.163	-0.04	0.038	0.03	0.25
2017-02-28 18:02:51		-4.98	-0.843	-0.05	0.025	0.03	0.25																-1.938	-1.238	-0.05	0.025	0.03	0.25
2017-02-28 19:03:04		-4.442	-0.753	-0.06	0.013	0.04	0.25																-1.938	-1.275	-0.06	0.013	0.04	0.25
2017-02-28 20:02:45		-3.971	-0.685	-0.05	-0.013	0.03	0.25																-2	-1.275	-0.05	-0.013	0.03	0.25
2017-02-28 21:02:41		-3.634	-0.629	-0.08	-0.013	0.04	0.25																-2	-1.238	-0.08	-0.013	0.04	0.25
2017-02-28 22:02:44		-3.432	-0.595	-0.08	-0.038	0.04	0.25																-1.938	-1.2	-0.08	-0.038	0.04	0.25
2017-02-28 23:02:45		-3.231	-0.584	-0.09	-0.05	0.03	0.25																-1.938	-1.125	-0.09	-0.05	0.03	0.25
2017-03-01 00:02:44		-3.163	-0.595	-0.1	-0.063	0.04	0.188																-1.875	-1.125	-0.1	-0.063	0.04	0.188
2017-03-01 01:02:45		-3.096	-0.595	-0.1	-0.075	0.03	0.25																-1.813	-1.125	-0.1	-0.075	0.03	0.25
2017-03-01 02:02:48		-3.231	-0.629	-0.11	-0.075	0.02	0.25																-1.813	-1.088	-0.11	-0.075	0.02	0.25
2017-03-01 03:02:45		-3.298	-0.652	-0.12	-0.075	0.05	0.25																-1.813	-1.05	-0.12	-0.075	0.05	0.25
2017-03-01 04:02:44		-3.5	-0.697	-0.12	-0.088	0.05	0.188																-1.875	-1.088	-0.12	-0.088	0.05	0.188
2017-03-01 05:02:44		-3.432	-0.697	-0.12	-0.1	0.05	0.188																-1.875	-1.088	-0.12	-0.1	0.05	0.188
2017-03-01 06:02:45		-3.298	-0.697	-0.13	-0.1	0.04	0.25																-1.938	-1.05	-0.13	-0.1	0.04	0.25
2017-03-01 07:02:45		-3.5	-0.753	-0.13	-0.113	0.04	0.188																-1.938	-1.163	-0.13	-0.113	0.04	0.188
2017-03-01 08:02:49		-3.5	-0.73	-0.13	-0.125	0.04	0.25																-1.938	-1.238	-0.13	-0.125	0.04	0.25
2017-03-01 09:02:44		-2.759	-0.618	-0.14	-0.125	0.05	0.25																-1.938	-1.2	-0.14	-0.125	0.05	0.25
2017-03-01 10:02:43		-1.413	-0.371	-0.14	-0.125	0.04	0.25																-1.875	-1.163	-0.14	-0.125	0.04	0.25
2017-03-01 11:03:59		0.269	-0.124	-0.15	-0.125	0.04	0.25																-1.563	-1.05	-0.15	-0.125	0.04	0.25
2017-03-01 12:02:42		1.952	0.135	-0.14	-0.138	0.06	0.188																-1.188	-0.788	-0.14	-0.138	0.06	0.188
2017-03-01 13:02:50		3.567	0.36	-0.16	-0.138	0.06	0.188																-0.688	-0.525	-0.16	-0.138	0.06	0.188
2017-03-01 14:02:50		4.644	0.494	-0.15	-0.125	0.05	0.188																-0.188	-0.3	-0.15	-0.125	0.05	0.188
2017-03-01 15:02:45		5.115	0.573	-0.13	-0.138	0.06	0.188																0.313	-0.075	-0.13	-0.138	0.06	0.188
2017-03-01 16:02:46		5.519	0.607	-0.14	-0.113	0.06	0.25																0.75	0.113	-0.14	-0.113	0.06	0.25
2017-03-01 17:02:44		5.384	0.595	-0.13	-0.113	0.06	0.188																1.125	0.263	-0.13	-0.113	0.06	0.188
2017-03-01 18:03:02		5.115	0.517	-0.14	-0.088	0.06	0.188																1.438	0.338	-0.14	-0.088	0.06	0.188
2017-03-01 19:03:00		4.644	0.427	-0.11	-0.075	0.04	0.188																1.5	0.413	-0.11	-0.075	0.04	0.188
2017-03-01 20:03:14		4.24	0.36	-0.12	-0.05	0.04	0.188																1.625	0.45	-0.12	-0.05	0.04	0.188
2017-03-01 21:02:45		3.971	0.303	-0.08	-0.05	0.04	0.188																1.688	0.45	-0.08	-0.05	0.04	0.188
2017-03-01 22:02:45		3.836	0.27	-0.08	-0.025	0.03	0.188																1.688	0.45	-0.08	-0.025	0.03	0.188
2017-03-01 23:02:46		3.769	0.258	-0.08	0	0.03	0.188																1.75	0.45	-0.08	0	0.03	0.188
2017-03-02 00:02:43		3.702	0.247	-0.06	0.013	0.04	0.188																1.75	0.45	-0.06	0.013	0.04	0.188
2017-03-02 01:02:46		3.567	0.225	-0.06	0.038	0.04	0.125																1.75	0.45	-0.06	0.038	0.04	0.125
2017-03-02 02:02:50		3.567	0.213	-0.04	0.038	0.05	0.125																1.75	0.488	-0.04	0.038	0.05	0.125
2017-03-02 03:02:44		3.432	0.191	-0.05	0.038	0.03	0.125																1.75	0.45	-0.05	0.038	0.03	0.125
2017-03-02 04:02:43		3.432	0.191	-0.03	0.05	0.02	0.188																1.813	0.45	-0.03	0.05	0.02	0.188
2017-03-02 05:02:47		3.365	0.18	-0.03	0.075	0.01	0.188																1.813	0.09	-0.03	0.075	0.01	0.188
2017-03-02 06:02:43		3.365	0.18	-0.02	0.075	0.03	0.125																1.875	0.075	-0.02	0.075	0.03	0.125
2017-03-02 07:02:46		3.702	0.27	-0.01	0.088	0.03	0.188																1.875	0.098	-0.01	0.088	0.03	0.188
2017-03-02 08:02:50		3.904	0.292	0	0.1	0.03	0.125																1.938	0.113	0	0.1	0.03	0.125
2017-03-02 09:02:43		3.432	0.191	0.01	0.1	0	0.125																1.938	0.12	0.01	0.1	0	0.125
2017-03-02 10:02:44		2.423	0.034	0	0.113	0.02	0.125																1.938	0.12	0	0.113	0.02	0.125
2017-03-02 11:02:44		1.144	-0.157	0.02	0.113	0.02	0.125																1.813	0.105	0.02	0.113	0.02	0.125
2017-03-02 12:02:47		-0.202	-0.348	0.02	0.125	0.02	0.125																1.563	0.075	0.02	0.125	0.02	0.125
2017-03-02 13:02:43		-1.413	-0.517	0.03	0.138	0	0.125																1.125	0.053	0.03	0.138	0	0.125
2017-03-02 14:02:50		-2.019	-0.573	0.04	0.125	0.01	0.125																0.813	0.008	0.04	0.125	0.01	0.125
2017-03-02 15:03:59		-1.884	-0.55	0.02	0.138	0.02	0.125																0.438	-0.015	0.02	0.138	0.02	0.125
2017-03-02 16:03:16		-1.615	-0.472	0.04	0.125	0	0.063																0.188	-0.015	0.04	0.125	0	0.063
2017-03-02 17:02:47		-1.01	-0.382	0.03	0.125	0.01	0.125																0.063	-0.023	0.03	0.125	0.01	0.125
2017-03-02 18:02:43		-0.269	-0.258	0.03	0.113	0	0.125																0.063	-0.015	0.03	0.113	0	0.125
2017-03-02 19:02:46		0.471	-0.124	0.03	0.1	0.02	0.125																0.125	0	0.03	0.1	0.02	0.125
2017-03-02 20:02:47		1.077	-0.045	0.04	0.1	0.03	0.125																0.25	0.015	0.04	0.1	0.03	0.125
2017-03-02 21:02:45		1.481	0.034	0.02	0.1	0.02	0.125																0.375	0.038	0.02	0.1	0.02	0.125
2017-03-02 22:02:45		1.817	0.079	0.01	0.088	0.03	0.125																0.5	0.045	0.01	0.088	0.03	0.125
2017-03-02 23:02:45		1.952	0.112	0.01	0.088	0.02	0.125																0.625	0.068	0.01	0.088	0.02	0.125
2017-03-03 00:02:44		2.086	0.135	0.02	0.075	0.02	0.125																0.75	0.083	0.02	0.075	0.02	0.125
2017-03-03 01:02:44		2.221	0.157	0.03	0.075	0.03	0.125																0.875	0.09	0.03	0.075	0.03	0.125
2017-03-03 02:02:48		2.288	0.18	0.02	0.088	0.02	0.125																1	0.098	0.02	0.088	0.02	0.125
2017-03-03 03:02:44		2.49	0.225	0.04	0.088	0.03	0.125																1.063	0.105	0.04	0.088	0.03	0.125
2017-03-03 04:02:44		2.49	0.315	0.03	0.1	0.04	0.063																1.125	0.12	0.03	0.1	0.04	0.063
2017-03-03 05:02:45		2.49	0.843	0.03	0.088	0.04	0.063																1.188	0.128	0.03	0.088	0.04	0.063
2017-03-03 06:02:45		2.558	2.696	0.03	0.1	0.03	0.063																1.25	0.143	0.03	0.1	0.03	0.063
2017-03-03 07:02:46		2.625	4.617	0.03	0.1	0.03	0.125																1.313	0.143	0.03	0.1	0.03	0.125
2017-03-03 08:02:48		2.625	7.381	0.04	0.1	0.03	0.125																1.375	0.165	0.04	0.1	0.03	0.125
2017-03-03 09:02:46		2.558	14.964	0.03	0.113	0.03	0.125																1.438	0.315	0.03	0.113	0.03	0.125
2017-03-03 10:02:42		2.356	15.56	0.04	0.113	0.03	0.125																1.438	0.638	0.04	0.113	0.03	0.125
2017-03-03 11:02:46		1.817	16.335	0.05	0.113	0.02	0.125																1.438	0.36	0.05	0.113	0.02	0.125
2017-03-03 12:02:43		1.077	18.177	0.04	0.125	0.02	0.125																1.313	0.143	0.04	0.125	0.02	0.125
2017-03-03 13:02:49		0.337	16.706	0.05	0.125	0.03	0.125																1.25	0.563	0.05	0.125	0.03	0.125
2017-03-03 14:02:48		-0.269	15.818	0.05	0.125	0.02	0.125																1	0.615	0.05	0.125	0.02	0.125
2017-03-03 15:02:45		-1.211	15.346	0.06	0.138	0.02	0.125																0.875	0.225	0.06	0.138	0.02	0.125
2017-03-03 16:02:45		-1.884	15.088	0.04	0.138	0.02	0.188																0.563	0.45	0.04	0.138	0.02	0.188
2017-03-03 17:02:47		-2.558	15.009	0.06	0.125	0.03	0.063																0.313	0.608	0.06	0.125	0.03	0.063
2017-03-03 18:02:42		-3.163	14.953	0.06	0.125	0.02	0.125																-0.063	0.03	0.06	0.125	0.02	0.125
2017-03-03 19:02:44		-3.567	14.493	0.04	0.125	0.03	0.125																-0.313	0.128	0.04	0.125	0.03	0.125
2017-03-03 20:02:49		-3.971	14.189	0.04	0.113	0.03	0.125																-0.625	0.503	0.04	0.113	0.03	0.125
2017-03-03 21:02:43		-4.24	13.908	0.03	0.1	0.04	0.125																-0.875	0.713	0.03	0.1	0.04	0.125
2017-03-03 22:02:46		-4.577	13.729	0.02	0.1	0.02	0.188																-1.063	0.585	0.02	0.1	0.02	0.188
2017-03-03 23:02:46		-4.779	13.526	0.03	0.075	0.04	0.125																-1.313	0.45	0.03	0.075	0.04	0.125
2017-03-04 00:02:46		-4.913	13.335	0.01	0.075	0.03	0.125																-1.5	0.443	0.01	0.075	0.03	0.125
2017-03-04 01:02:46		-5.25	13.156	0	0.05	0.03	0.188																-1.75	0.42	0	0.05	0.03	0.188
2017-03-04 02:02:49		-5.653	12.965	-0.01	0.025	0.05	0.188																-1.938	0.75	-0.01	0.025	0.05	0.188
2017-03-04 03:02:46		-6.192	12.796	-0.01	0.013	0.06	0.188																-2.125	0.375	-0.01	0.013	0.06	0.188
2017-03-04 04:02:45		-6.596	12.56	-0.02	0	0.07	0.188																-2.375	0.375	-0.02	0	0.07	0.188
2017-03-04 05:02:47		-6.865	11.909	-0.02	-0.013	0.07	0.188																-2.625	0.375	-0.02	-0.013	0.07	0.188
2017-03-04 06:02:42		-7.134	9.965	-0.03	-0.038	0.08	0.188																-2.813	1.875	-0.03	-0.038	0.08	0.188
2017-03-04 07:02:45		-7.471	7.932	-0.03	-0.05	0.06	0.125																-3.063	0.375	-0.03	-0.05	0.06	0.125
2017-03-04 08:02:49		-7.403	5.078	-0.05	-0.063	0.05	0.188																-3.313	0.375	-0.05	-0.063	0.05	0.188
2017-03-04 09:02:42		-7.134	-2.561	-0.04	-0.088	0.09	0.188																-3.438	0.375	-0.04	-0.088	0.09	0.188
2017-03-04 10:02:44		-6.057	-3.224	-0.04	-0.113	0.06	0.188																-3.5	0.375	-0.04	-0.113	0.06	0.188
2017-03-04 11:02:45		-4.24	-4.011	-0.05	-0.125	0.09	0.125																-3.438	0.375	-0.05	-0.125	0.09	0.125
2017-03-04 12:02:46		-2.019	-5.909	-0.05	-0.15	0.09	0.188																-3.125	0.375	-0.05	-0.15	0.09	0.188
2017-03-04 13:02:44		-0.269	-4.55	-0.06	-0.163	0.09	0.188																-2.688	0.068	-0.06	-0.163	0.09	0.188
2017-03-04 14:02:50		0.74	-3.808	-0.06	-0.175	0.1	0.188																-2.125	0.795	-0.06	-0.175	0.1	0.188
2017-03-04 15:02:41		1.346	-3.528	-0.06	-0.188	0.09	0.188																-1.688	0.42	-0.06	-0.188	0.09	0.188
2017-03-04 16:02:42		1.481	-3.46	-0.04	-0.188	0.09	0.125																-1.188	0.165	-0.04	-0.188	0.09	0.125
2017-03-04 17:02:46		1.279	-3.505	-0.04	-0.188	0.08	0.188																-0.875	-0.03	-0.04	-0.188	0.08	0.188
2017-03-04 18:02:42		1.144	-3.55	-0.03	-0.175	0.11	0.188																-0.625	-0.263	-0.03	-0.175	0.11	0.188
2017-03-04 19:02:47		0.942	-3.146	-0.01	-0.163	0.08	0.188																-0.438	-0.405	-0.01	-0.163	0.08	0.188
2017-03-04 20:02:48		0.942	-2.899	0	-0.163	0.07	0.188																-0.313	-0.473	0	-0.163	0.07	0.188
2017-03-04 21:02:44		0.808	-2.651	0.02	-0.15	0.07	0.188																-0.25	-0.495	0.02	-0.15	0.07	0.188
2017-03-04 22:02:45		0.74	-2.528	0.05	-0.15	0.08	0.125																-0.188	-0.525	0.05	-0.15	0.08	0.125
2017-03-04 23:02:44		0.404	-2.393	0.04	-0.125	0.07	0.188																-0.188	-0.555	0.04	-0.125	0.07	0.188
2017-03-05 00:02:43		0.067	-2.269	0.06	-0.125	0.09	0.188																-0.188	-0.563	0.06	-0.125	0.09	0.188
2017-03-05 01:02:46		-0.067	-2.157	0.07	-0.113	0.07	0.125																-0.125	-0.585	0.07	-0.113	0.07	0.125
2017-03-05 02:02:50		0.202	-1.989	0.09	-0.1	0.07	0.125																-0.188	-0.578	0.09	-0.1	0.07	0.125
2017-03-05 03:02:44		0.404	-1.887	0.09	-0.088	0.05	0.125																-0.125	-0.57	0.09	-0.088	0.05	0.125
2017-03-05 04:02:43		0.673	-1.775	0.11	-0.088	0.04	0.125																-0.063	-0.563	0.11	-0.088	0.04	0.125
2017-03-05 05:02:45		0.875	-1.663	0.11	-0.088	0.03	0.188																0	-0.563	0.11	-0.088	0.03	0.188
2017-03-05 06:02:43		1.077	-1.562	0.12	-0.075	0.03	0.125																0.063	-0.54	0.12	-0.075	0.03	0.125
2017-03-05 07:02:43		1.144	-1.483	0.12	-0.075	0.03	0.188																0.125	-0.54	0.12	-0.075	0.03	0.188
2017-03-05 08:02:48		1.211	-1.404	0.13	-0.063	0.04	0.125																0.25	-0.525	0.13	-0.063	0.04	0.125
2017-03-05 09:02:45		1.413	-1.337	0.14	-0.063	0.01	0.125																0.313	-0.51	0.14	-0.063	0.01	0.125
2017-03-05 10:02:45		0.942	-1.303	0.15	-0.05	0.03	0.125																0.375	-0.51	0.15	-0.05	0.03	0.125
2017-03-05 11:02:43		0.135	-1.314	0.15	-0.038	0.03	0.188																0.313	-0.495	0.15	-0.038	0.03	0.188
2017-03-05 12:03:01		-1.077	-1.303	0.16	-0.038	0.02	0.125																0.188	-0.518	0.16	-0.038	0.02	0.125
2017-03-05 13:03:10		-1.75	-1.247	0.16	-0.038	0.03	0.125																0	-0.54	0.16	-0.038	0.03	0.125
2017-03-05 14:02:48		-2.086	-1.202	0.16	-0.025	0.02	0.125																-0.313	-0.548	0.16	-0.025	0.02	0.125
2017-03-05 15:02:44		-2.019	-1.135	0.17	-0.038	0.02	0.125																-0.438	-0.548	0.17	-0.038	0.02	0.125
2017-03-05 16:02:45		-2.019	-1.067	0.16	-0.038	0.03	0.125																-0.625	-0.548	0.16	-0.038	0.03	0.125
2017-03-05 17:03:16		-1.683	-1.034	0.16	-0.038	0.02	0.125																-0.75	-0.533	0.16	-0.038	0.02	0.125
2017-03-05 18:02:45		-1.413	-0.989	0.16	-0.05	0.02	0.063																-0.75	-0.503	0.16	-0.05	0.02	0.063
2017-03-05 19:02:45		-1.144	-0.977	0.16	-0.05	0.02	0.063																-0.75	-0.495	0.16	-0.05	0.02	0.063
2017-03-05 20:02:50		-0.942	-0.932	0.15	-0.038	0.03	0.063																-0.75	-0.473	0.15	-0.038	0.03	0.063
2017-03-05 21:02:44		-0.673	-0.899	0.15	-0.05	0.02	0.063																-0.688	-0.465	0.15	-0.05	0.02	0.063
2017-03-05 22:02:43		-0.337	-0.843	0.14	-0.05	0.02	0.063																-0.625	-0.458	0.14	-0.05	0.02	0.063
2017-03-05 23:02:41		0.067	-0.786	0.15	-0.063	0.02	0.063																-0.5	-0.42	0.15	-0.063	0.02	0.063
2017-03-06 00:02:44		0.471	-0.73	0.15	-0.063	0	0.063																-0.375	-0.405	0.15	-0.063	0	0.063
2017-03-06 01:02:44		0.875	-0.663	0.15	-0.063	0.02	0.063																-0.313	-0.368	0.15	-0.063	0.02	0.063
2017-03-06 02:02:48		0.875	-0.685	0.15	-0.063	0	0.063																-0.125	-0.36	0.15	-0.063	0	0.063
2017-03-06 03:02:45		0.875	-0.685	0.14	-0.063	-0.01	0.125																-0.125	-0.345	0.14	-0.063	-0.01	0.125
2017-03-06 04:02:46		0.808	-0.674	0.13	-0.05	0	0.063																0	-0.338	0.13	-0.05	0	0.063
2017-03-06 05:02:45		0.875	-0.674	0.14	-0.05	0.01	0																0.063	-0.33	0.14	-0.05	0.01	0
2017-03-06 06:02:46		0.875	-0.652	0.14	-0.05	0	0.063																0.125	-0.33	0.14	-0.05	0	0.063
2017-03-06 07:02:46		1.144	-0.618	0.14	-0.038	0.01	0																0.188	-0.315	0.14	-0.038	0.01	0
2017-03-06 09:02:45		1.01	-0.607	0.15	-0.05	0	0.063																0.25	-0.308	0.15	-0.05	0	0.063
2017-03-06 09:02:45		0.606	-0.629	0.14	-0.038	0.01	0																0.25	-0.308	0.14	-0.038	0.01	0
2017-03-06 10:04:06		0.067	-0.652	0.14	-0.038	-0.01	0.063																0.25	-0.315	0.14	-0.038	-0.01	0.063
2017-03-06 11:02:51		-0.471	-0.652	0.14	-0.038	-0.02	0.063																0.125	-0.323	0.14	-0.038	-0.02	0.063
2017-03-06 12:03:56		-0.875	-0.685	0.14	-0.025	-0.01	0																0.063	-0.345	0.14	-0.025	-0.01	0
2017-03-06 13:02:29		-1.211	-0.685	0.14	-0.025	-0.01	0																-0.188	-0.345	0.14	-0.025	-0.01	0
2017-03-06 14:02:51		-1.211	-0.64	0.14	-0.025	-0.03	0.063																-0.188	-0.375	0.14	-0.025	-0.03	0.063
2017-03-06 15:02:46		-1.077	-0.573	0.13	-0.013	-0.01	0																-0.375	-0.375	0.13	-0.013	-0.01	0
2017-03-06 16:02:45		-0.606	-0.517	0.14	-0.025	-0.01	0																-0.375	-0.368	0.14	-0.025	-0.01	0
2017-03-06 17:02:46		0.067	-0.461	0.13	-0.025	0.01	0																-0.375	-0.345	0.13	-0.025	0.01	0
2017-03-06 18:02:42		0	-0.494	0.11	-0.013	0	0																-0.313	-0.338	0.11	-0.013	0	0
2017-03-06 19:02:47		-0.202	-0.528	0.12	-0.038	0	0																-0.313	-0.33	0.12	-0.038	0	0
2017-03-06 20:02:46		-0.538	-0.539	0.11	-0.038	-0.01	0																-0.313	-0.338	0.11	-0.038	-0.01	0
2017-03-06 21:02:43		-0.808	-0.584	0.11	-0.038	0	0																-0.313	-0.338	0.11	-0.038	0	0
2017-03-06 22:02:43		-1.144	-0.607	0.1	-0.038	-0.02	0.063																-0.375	-0.338	0.1	-0.038	-0.02	0.063
2017-03-06 23:02:46		-1.413	-0.64	0.1	-0.038	-0.01	0																-0.5	-0.353	0.1	-0.038	-0.01	0
2017-03-07 00:02:52		-1.75	-0.674	0.09	-0.038	-0.01	0																-0.625	-0.368	0.09	-0.038	-0.01	0
2017-03-07 01:02:43		-2.154	-0.719	0.08	-0.038	-0.01	0																-0.813	-0.383	0.08	-0.038	-0.01	0
2017-03-07 02:03:08		-2.423	-0.697	0.07	-0.038	-0.01	0																-0.813	-0.398	0.07	-0.038	-0.01	0
2017-03-07 03:02:43		-2.019	-0.64	0.07	-0.038	0	-0.063																-0.875	-0.405	0.07	-0.038	0	-0.063
2017-03-07 04:02:43		-1.683	-0.573	0.08	-0.063	-0.02	0.063																-1	-0.39	0.08	-0.063	-0.02	0.063
2017-03-07 05:02:43		-1.952	-0.573	0.07	-0.05	-0.01	0																-0.938	-0.405	0.07	-0.05	-0.01	0
2017-03-07 06:02:44		-2.154	-0.618	0.05	-0.063	-0.01	0																-1.063	-0.405	0.05	-0.063	-0.01	0
2017-03-07 07:02:44		-1.884	-0.607	0.06	-0.063	-0.01	0																-1.063	-0.398	0.06	-0.063	-0.01	0
2017-03-07 08:03:36		-1.683	-0.562	0.06	-0.063	0.01	-0.063																-1.063	-0.398	0.06	-0.063	0.01	-0.063
2017-03-07 09:02:44		-1.279	-0.494	0.05	-0.075	0.03	0																-1.063	-0.39	0.05	-0.075	0.03	0
2017-03-07 10:04:05		-0.337	-0.404	0.05	-0.075	0.01	-0.063																-1	-0.36	0.05	-0.075	0.01	-0.063
2017-03-07 11:02:27		0.875	-0.303	0.04	-0.088	0.01	-0.063																-0.75	-0.338	0.04	-0.088	0.01	-0.063
2017-03-07 12:02:49		2.221	-0.213	0.03	-0.088	0.02	0																-0.5	-0.278	0.03	-0.088	0.02	0
2017-03-07 13:02:46		3.029	-0.191	0.02	-0.075	0.01	0																-0.063	-0.24	0.02	-0.075	0.01	0
2017-03-07 14:02:52		3.5	-0.225	0.01	-0.088	0.02	0																0.25	-0.18	0.01	-0.088	0.02	0
2017-03-07 15:02:44		3.567	-0.292	0.02	-0.088	0.01	0.063																0.625	-0.15	0.02	-0.088	0.01	0.063
2017-03-07 16:02:45		3.163	-0.393	0.01	-0.063	0	0.063																0.813	-0.128	0.01	-0.063	0	0.063
2017-03-07 17:02:45		2.288	-0.573	0.01	-0.05	0	0																0.938	-0.143	0.01	-0.05	0	0
2017-03-07 18:02:44		1.548	-0.708	0.04	-0.063	-0.01	0																0.875	-0.158	0.04	-0.063	-0.01	0
2017-03-07 19:02:45		0.74	-0.831	0.02	-0.038	0	0.063																0.75	-0.195	0.02	-0.038	0	0.063
2017-03-07 20:02:52		0.135	-0.977	0.02	-0.038	-0.02	0																0.5	-0.225	0.02	-0.038	-0.02	0
2017-03-07 21:02:44		-0.404	-1.067	0.02	-0.025	-0.04	0																0.125	-0.248	0.02	-0.025	-0.04	0
2017-03-07 22:02:47		-0.808	-1.123	0.02	-0.013	-0.03	0																0.063	-0.293	0.02	-0.013	-0.03	0
2017-03-07 23:02:44		-1.01	-1.157	0.01	0	-0.05	0																-0.125	-0.323	0.01	0	-0.05	0
2017-03-08 00:02:44		-1.077	-1.191	0.02	0	-0.03	0																-0.188	-0.345	0.02	0	-0.03	0
2017-03-08 01:02:44		-0.942	-1.213	0.01	0	-0.05	0																-0.25	-0.368	0.01	0	-0.05	0
2017-03-08 02:02:48		-0.808	-1.258	0.01	0	-0.05	0																-0.438	-0.383	0.01	0	-0.05	0
2017-03-08 03:02:45		-1.144	-1.337	0.01	-0.013	-0.03	0																-0.5	-0.398	0.01	-0.013	-0.03	0
2017-03-08 04:02:44		-1.481	-1.427	0	0	-0.04	-0.063																-0.563	-0.435	0	0	-0.04	-0.063
2017-03-08 05:02:45		-1.279	-1.46	-0.02	-0.013	-0.05	0																-0.688	-0.45	-0.02	-0.013	-0.05	0
2017-03-08 06:02:46		-1.144	-1.494	0	-0.013	-0.05	0																-0.688	-0.458	0	-0.013	-0.05	0
2017-03-08 07:02:46		-1.481	-1.562	-0.02	-0.025	-0.03	0																-0.75	-0.473	-0.02	-0.025	-0.03	0
2017-03-08 08:02:49		-1.683	-1.629	-0.03	-0.025	0.01	0																-0.625	-0.503	-0.03	-0.025	0.01	0
2017-03-08 09:02:48		-2.154	-1.618	-0.01	-0.025	-0.06	0																-0.688	-0.51	-0.01	-0.025	-0.06	0
2017-03-08 10:02:45		-2.288	-1.472	-0.03	-0.025	-0.02	0																-0.813	-0.525	-0.03	-0.025	-0.02	0
2017-03-08 11:02:45		-1.75	-1.292	-0.03	-0.025	-0.01	0																-0.875	-0.54	-0.03	-0.025	-0.01	0
2017-03-08 12:02:44		-1.346	-1.112	-0.03	-0.038	-0.03	0																-0.875	-0.548	-0.03	-0.038	-0.03	0
2017-03-08 13:02:47		-0.942	-0.966	-0.04	-0.05	-0.02	0																-0.813	-0.525	-0.04	-0.05	-0.02	0
2017-03-08 14:02:46		-0.538	-0.843	-0.03	-0.05	-0.01	-0.063																-0.75	-0.503	-0.03	-0.05	-0.01	-0.063
2017-03-08 15:02:48		-0.337	-0.753	-0.05	-0.05	0	-0.125																-0.688	-0.473	-0.05	-0.05	0	-0.125
2017-03-08 16:02:46		0	-0.685	-0.04	-0.063	0	-0.063																-0.563	-0.458	-0.04	-0.063	0	-0.063
2017-03-08 17:02:42		0.269	-0.618	-0.04	-0.063	-0.02	0																-0.5	-0.42	-0.04	-0.063	-0.02	0
2017-03-08 18:02:44		0.606	-0.55	-0.06	-0.05	-0.01	0																-0.313	-0.405	-0.06	-0.05	-0.01	0
2017-03-08 19:02:43		1.144	-0.528	-0.04	-0.05	0	-0.063																-0.125	-0.375	-0.04	-0.05	0	-0.063
2017-03-08 20:02:46		1.548	-0.494	-0.03	-0.05	-0.01	0																0.125	-0.345	-0.03	-0.05	-0.01	0
2017-03-08 21:02:42		1.884	-0.472	-0.02	-0.05	0.01	0																0.438	-0.33	-0.02	-0.05	0.01	0
2017-03-08 22:02:46		2.154	-0.483	-0.01	-0.05	0.02	-0.063																0.5	-0.293	-0.01	-0.05	0.02	-0.063
2017-03-09 00:02:43		2.423	-0.483	0.01	-0.05	0.02	0																0.75	-0.27	0.01	-0.05	0.02	0
2017-03-09 00:02:43		2.625	-0.461	0.01	-0.05	0.01	0																0.813	-0.248	0.01	-0.05	0.01	0
2017-03-09 01:02:46		2.759	-0.449	0.02	-0.038	0.03	0																1	-0.225	0.02	-0.038	0.03	0
2017-03-09 02:02:50		2.759	-0.438	0.03	-0.038	0.03	0																1.063	-0.203	0.03	-0.038	0.03	0
2017-03-09 03:02:43		2.759	-0.416	0.03	-0.013	0	-0.063																1.188	-0.188	0.03	-0.013	0	-0.063
2017-03-09 04:02:43		2.827	-0.393	0.03	-0.013	0.02	-0.063																1.313	-0.173	0.03	-0.013	0.02	-0.063
2017-03-09 05:02:43		2.827	-0.36	0.05	0	0.03	-0.063																1.313	-0.158	0.05	0	0.03	-0.063
2017-03-09 06:02:44		2.894	-0.315	0.06	0	0.02	-0.063																1.438	-0.158	0.06	0	0.02	-0.063
2017-03-09 07:03:30		2.894	-0.27	0.07	0.013	0	-0.063																1.5	-0.15	0.07	0.013	0	-0.063
2017-03-09 08:02:39		3.029	-0.247	0.06	0.025	0	-0.063																1.375	-0.143	0.06	0.025	0	-0.063
2017-03-09 09:02:45		4.98	0	0.04	0.025	0	-0.063																1.5	-0.128	0.04	0.025	0	-0.063
2017-03-09 10:02:45		5.923	0.022	0.05	0.038	0.03	-0.063																1.75	-0.083	0.05	0.038	0.03	-0.063
2017-03-09 11:02:43		5.855	-0.045	0.05	0.038	0.01	-0.063																2.063	-0.038	0.05	0.038	0.01	-0.063
2017-03-09 12:02:45		5.653	-0.056	0.05	0.05	0.01	0																2.313	0	0.05	0.05	0.01	0
2017-03-09 13:02:44		5.384	-0.079	0.06	0.075	0.01	-0.063																2.438	0.03	0.06	0.075	0.01	-0.063
2017-03-09 14:02:49		4.98	-0.101	0.07	0.088	0.02	-0.063																2.563	0.023	0.07	0.088	0.02	-0.063
2017-03-09 15:02:43		4.577	-0.169	0.08	0.1	-0.01	0																2.563	0	0.08	0.1	-0.01	0
2017-03-09 16:02:44		4.038	-0.236	0.09	0.113	0	-0.063																2.5	-0.008	0.09	0.113	0	-0.063
2017-03-09 17:02:45		3.432	-0.292	0.1	0.125	0	-0.063																2.438	-0.045	0.1	0.125	0	-0.063
2017-03-09 18:02:44		3.096	-0.337	0.12	0.125	-0.01	-0.063																2.313	-0.068	0.12	0.125	-0.01	-0.063
2017-03-09 19:02:43		2.827	-0.382	0.11	0.15	-0.03	-0.063																2.25	-0.083	0.11	0.15	-0.03	-0.063
2017-03-09 20:02:48		2.625	-0.404	0.11	0.163	-0.01	-0.063																2.188	-0.105	0.11	0.163	-0.01	-0.063
2017-03-09 21:02:45		2.49	-0.427	0.12	0.163	-0.01	-0.063																2.125	-0.113	0.12	0.163	-0.01	-0.063
2017-03-09 22:02:44		2.288	-0.449	0.13	0.163	-0.02	-0.063																2	-0.128	0.13	0.163	-0.02	-0.063
2017-03-09 23:02:44		2.086	-0.472	0.12	0.175	-0.01	-0.063																1.875	-0.143	0.12	0.175	-0.01	-0.063
2017-03-10 00:02:44		2.019	-0.494	0.12	0.188	-0.02	-0.063																1.875	-0.15	0.12	0.188	-0.02	-0.063
2017-03-10 01:02:45		1.884	-0.506	0.12	0.188	-0.02	-0.063																1.75	-0.158	0.12	0.188	-0.02	-0.063
2017-03-10 02:02:49		1.683	-0.528	0.12	0.188	-0.02	-0.063																1.75	-0.18	0.12	0.188	-0.02	-0.063
2017-03-10 03:02:41		1.548	-0.539	0.12	0.188	-0.01	0																1.625	-0.195	0.12	0.188	-0.01	0
2017-03-10 04:02:44		1.346	-0.562	0.11	0.188	-0.02	0																1.563	-0.203	0.11	0.188	-0.02	0
2017-03-10 05:02:44		1.144	-0.607	0.12	0.188	-0.02	0																1.563	-0.218	0.12	0.188	-0.02	0
2017-03-10 06:02:46		0.942	-0.618	0.11	0.188	0	0																1.375	-0.218	0.11	0.188	0	0
2017-03-10 07:02:45		1.279	-0.573	0.11	0.188	0.02	0																1.375	-0.225	0.11	0.188	0.02	0
2017-03-10 08:02:49		1.952	-0.404	0.12	0.188	-0.04	0																1.313	-0.218	0.12	0.188	-0.04	0
2017-03-10 10:02:29		1.817	-0.416	0.12	0.2	0	0																1.375	-0.21	0.12	0.2	0	0
2017-03-10 11:02:42		2.288	-0.315	0.11	0.188	0	0																1.438	-0.188	0.11	0.188	0	0
2017-03-10 12:02:46		2.558	-0.225	0.11	0.188	0	0																1.5	-0.165	0.11	0.188	0	0
2017-03-10 13:03:21		2.558	-0.225	0.1	0.2	0.02	-0.063																1.563	-0.135	0.1	0.2	0.02	-0.063
2017-03-10 14:02:53		2.558	-0.258	0.1	0.188	0.01	0																1.625	-0.143	0.1	0.188	0.01	0
2017-03-10 15:02:41		2.288	-0.315	0.09	0.188	0.01	0																1.625	-0.15	0.09	0.188	0.01	0
2017-03-10 16:02:46		2.154	-0.36	0.11	0.188	0.02	0																1.625	-0.165	0.11	0.188	0.02	0
2017-03-10 17:02:42		1.884	-0.416	0.1	0.188	0.02	0																1.563	-0.18	0.1	0.188	0.02	0
2017-03-10 18:02:53		1.75	-0.449	0.1	0.188	0.03	0																1.563	-0.18	0.1	0.188	0.03	0
2017-03-10 19:02:45		1.548	-0.517	0.09	0.2	0.02	0																1.5	-0.195	0.09	0.2	0.02	0
2017-03-10 20:02:51		1.413	-0.528	0.1	0.188	0.02	0.063																1.375	-0.203	0.1	0.188	0.02	0.063
2017-03-10 21:02:42		1.413	-0.539	0.11	0.188	0.02	0																1.313	-0.21	0.11	0.188	0.02	0
2017-03-10 22:02:42		1.346	-0.562	0.1	0.188	0.01	0.063																1.25	-0.225	0.1	0.188	0.01	0.063
2017-03-10 23:02:45		1.279	-0.573	0.09	0.2	0.03	0.063																1.25	-0.233	0.09	0.2	0.03	0.063
2017-03-11 00:02:45		1.211	-0.595	0.08	0.188	0.03	0.063																1.25	-0.233	0.08	0.188	0.03	0.063
2017-03-11 01:02:45		1.01	-0.618	0.08	0.188	0.03	0.063																1.188	-0.248	0.08	0.188	0.03	0.063
2017-03-11 02:02:49		0.875	-0.64	0.07	0.188	0.03	0.063																1.125	-0.263	0.07	0.188	0.03	0.063
2017-03-11 03:02:42		0.942	-0.652	0.07	0.188	0.03	0.063																1.063	-0.263	0.07	0.188	0.03	0.063
2017-03-11 04:02:45		0.808	-0.663	0.06	0.175	0.03	0.063																1	-0.255	0.06	0.175	0.03	0.063
2017-03-11 05:02:46		0.875	-0.685	0.07	0.175	0.04	0.063																0.938	-0.27	0.07	0.175	0.04	0.063
2017-03-11 06:02:46		1.01	-0.652	0.06	0.175	0.03	0.063																0.938	-0.263	0.06	0.175	0.03	0.063
2017-03-11 07:02:48		1.413	-0.595	0.06	0.188	0.03	0.063																1	-0.255	0.06	0.188	0.03	0.063
2017-03-11 08:02:47		1.615	-0.562	0.06	0.175	0.06	0.063																1	-0.24	0.06	0.175	0.06	0.063
2017-03-11 09:02:49		1.75	-0.573	0.05	0.175	0.03	0.125																1.063	-0.24	0.05	0.175	0.03	0.125
2017-03-11 10:02:47		1.211	-0.674	0.05	0.163	0.04	0.125																1.063	-0.248	0.05	0.163	0.04	0.125
2017-03-11 11:02:43		0.808	-0.753	0.04	0.175	0.02	0.125																1.063	-0.278	0.04	0.175	0.02	0.125
2017-03-11 12:02:43		0.673	-0.798	0.04	0.175	0.05	0.125																0.938	-0.293	0.04	0.175	0.05	0.125
2017-03-11 13:02:47		0.606	-0.843	0.05	0.163	0.03	0.125																0.938	-0.323	0.05	0.163	0.03	0.125
2017-03-11 14:02:49		0.538	-0.831	0.04	0.163	0.04	0.125																0.813	-0.338	0.04	0.163	0.04	0.125
2017-03-11 15:02:43		0.673	-0.82	0.04	0.163	0.04	0.125																0.813	-0.345	0.04	0.163	0.04	0.125
2017-03-11 16:02:45		0.538	-0.831	0.03	0.163	0.04	0.125																0.75	-0.345	0.03	0.163	0.04	0.125
2017-03-11 17:02:42		0.673	-0.809	0.02	0.163	0.03	0.188																0.75	-0.338	0.02	0.163	0.03	0.188
2017-03-11 18:02:47		0.942	-0.786	0.02	0.163	0.02	0.188																0.75	-0.338	0.02	0.163	0.02	0.188
2017-03-11 19:02:44		1.413	-0.685	0.03	0.15	0.04	0.188																0.75	-0.308	0.03	0.15	0.04	0.188
2017-03-11 20:02:47		1.817	-0.618	0.03	0.15	0.05	0.125																0.875	-0.293	0.03	0.15	0.05	0.125
2017-03-11 21:02:45		2.086	-0.584	0.02	0.15	0.05	0.188																0.938	-0.27	0.02	0.15	0.05	0.188
2017-03-11 22:02:47		2.49	-0.517	0.02	0.163	0.06	0.125																1.125	-0.24	0.02	0.163	0.06	0.125
2017-03-11 23:02:43		2.894	-0.461	0.02	0.15	0.05	0.125																1.188	-0.21	0.02	0.15	0.05	0.125
2017-03-12 00:02:44		3.163	-0.427	0.03	0.15	0.05	0.188																1.313	-0.195	0.03	0.15	0.05	0.188
2017-03-12 01:02:45		3.432	-0.393	0.04	0.15	0.05	0.188																1.438	-0.165	0.04	0.15	0.05	0.188
2017-03-12 02:02:47		3.567	-0.382	0.05	0.15	0.05	0.188																1.625	-0.143	0.05	0.15	0.05	0.188
2017-03-12 03:02:45		3.634	-0.371	0.04	0.163	0.05	0.188																1.688	-0.128	0.04	0.163	0.05	0.188
2017-03-12 04:02:45		3.836	-0.36	0.06	0.163	0.06	0.188																1.875	-0.128	0.06	0.163	0.06	0.188
2017-03-12 05:02:44		3.904	-0.348	0.05	0.175	0.05	0.188																2	-0.098	0.05	0.175	0.05	0.188
2017-03-12 06:02:44		3.904	-0.36	0.06	0.175	0.04	0.25																2	-0.083	0.06	0.175	0.04	0.25
2017-03-12 07:02:44		3.634	-0.438	0.07	0.175	0.05	0.25																2.063	-0.09	0.07	0.175	0.05	0.25
2017-03-12 08:02:50		3.298	-0.483	0.05	0.188	0.07	0.188																2.063	-0.105	0.05	0.188	0.07	0.188
2017-03-12 09:02:46		2.961	-0.55	0.06	0.188	0.07	0.125																2.063	-0.105	0.06	0.188	0.07	0.125
2017-03-12 10:02:48		2.827	-0.595	0.06	0.2	0.07	0.188																2.063	-0.113	0.06	0.2	0.07	0.188
2017-03-12 11:02:41		2.49	-0.685	0.07	0.2	0.07	0.188																2	-0.135	0.07	0.2	0.07	0.188
2017-03-12 12:02:44		2.221	-0.753	0.07	0.213	0.06	0.188																1.938	-0.158	0.07	0.213	0.06	0.188
2017-03-12 13:02:46		1.817	-0.843	0.07	0.213	0.06	0.188																1.813	-0.188	0.07	0.213	0.06	0.188
[truncated: 1,874 more rows]
